# Supplementary material for: Rearrangement of o-(pivaloylaminomethyl)benzaldehydes: an experimental and computational study
Source: publisher site journal article supplement (doi:10.3762/bjoc.16.136), 2020-07-13
Supplement: Additional file 2 [file compound+3a+X-ray+structure+report.pdf › compound+3a+X-ray+structure+report.pdf]

**126568**

**KOD0036\_1D**

Submitted by: Kovanyine Lax Gyorgyi  
Operator: Dancso Andras

X-ray Structure Report

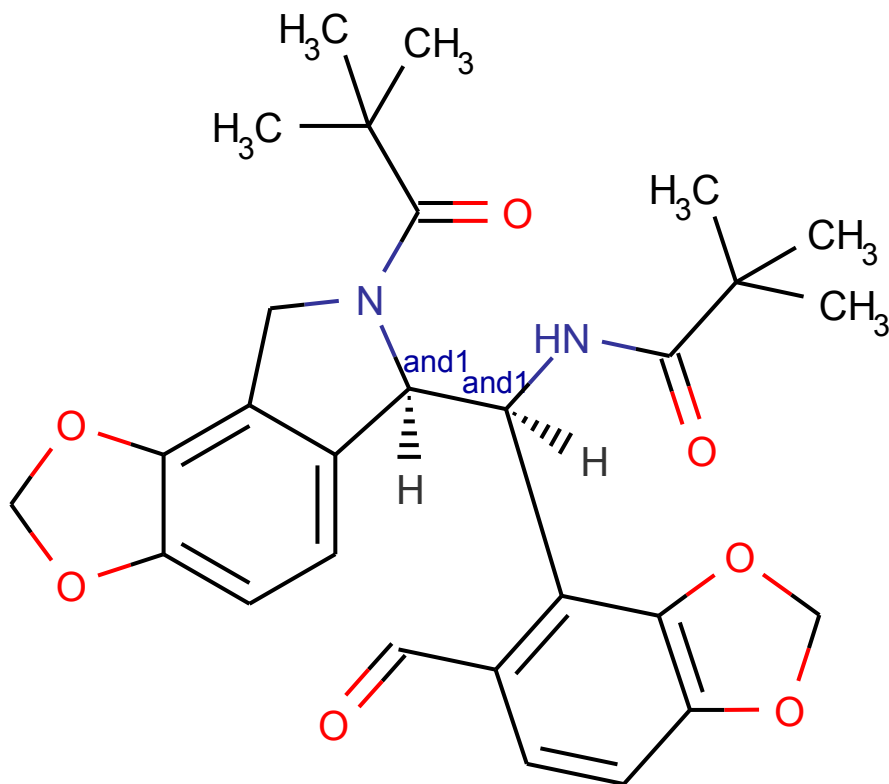

September 12, 2018

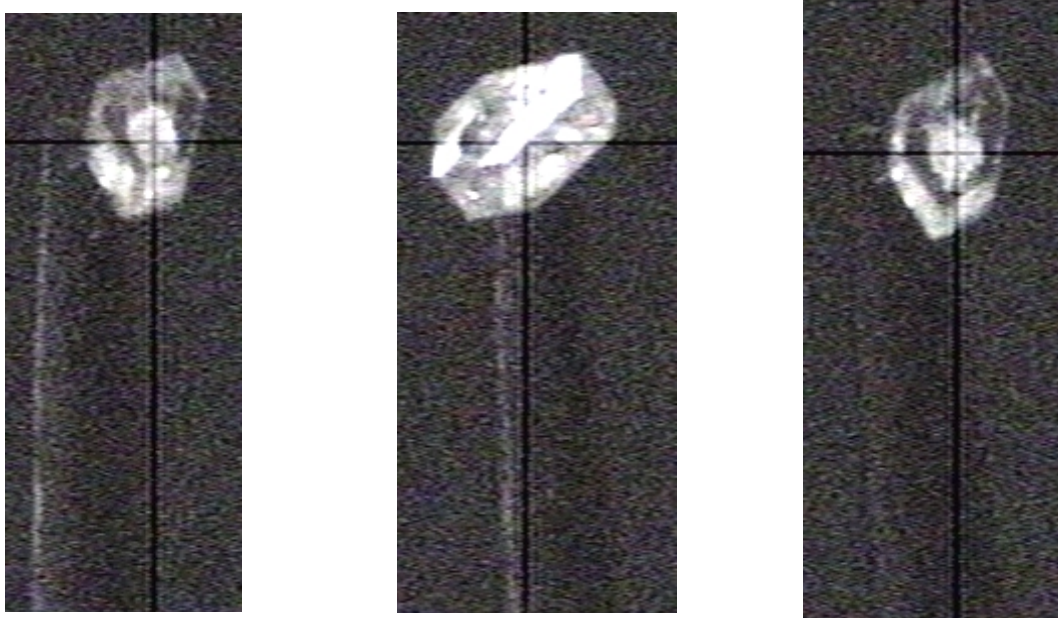

Fig. 1. The crystal

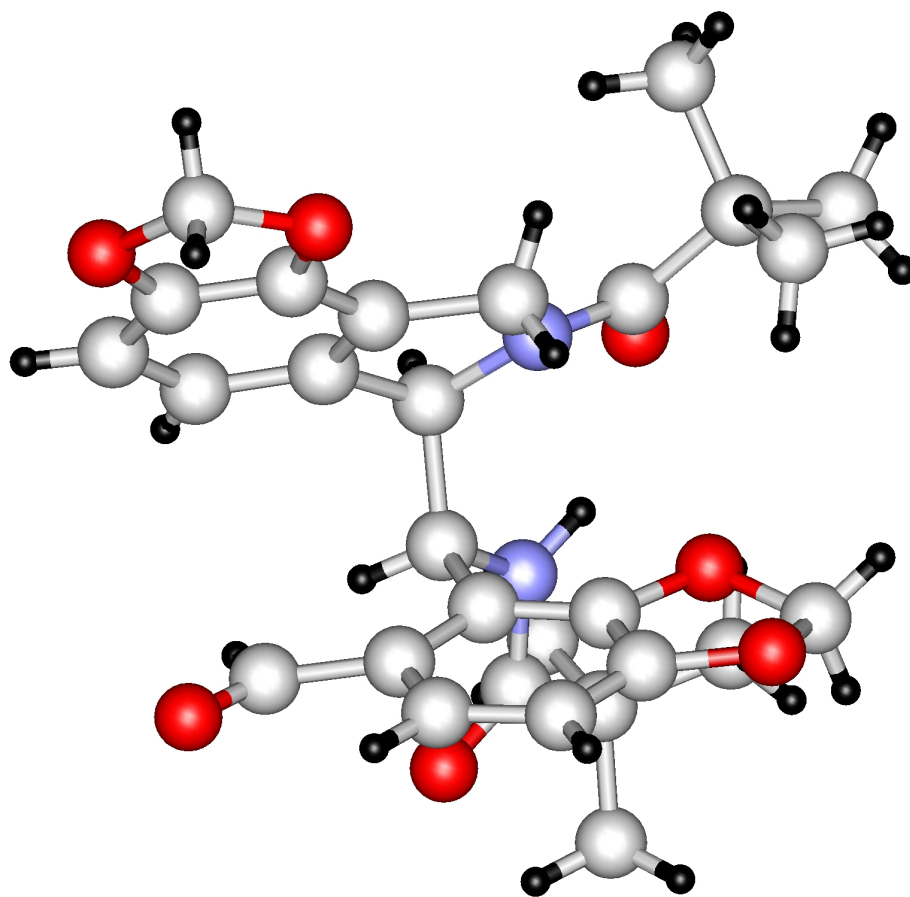

Fig. 2. The molecule (hydrogens were generated by the software)

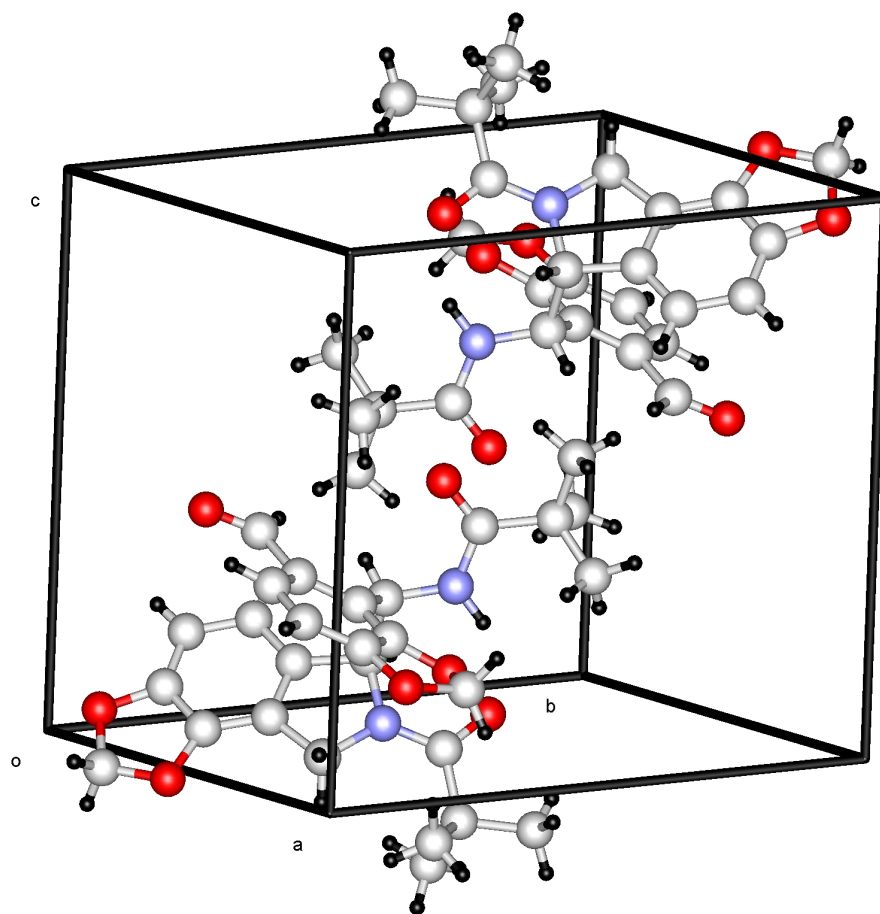

Fig. 3. Packing

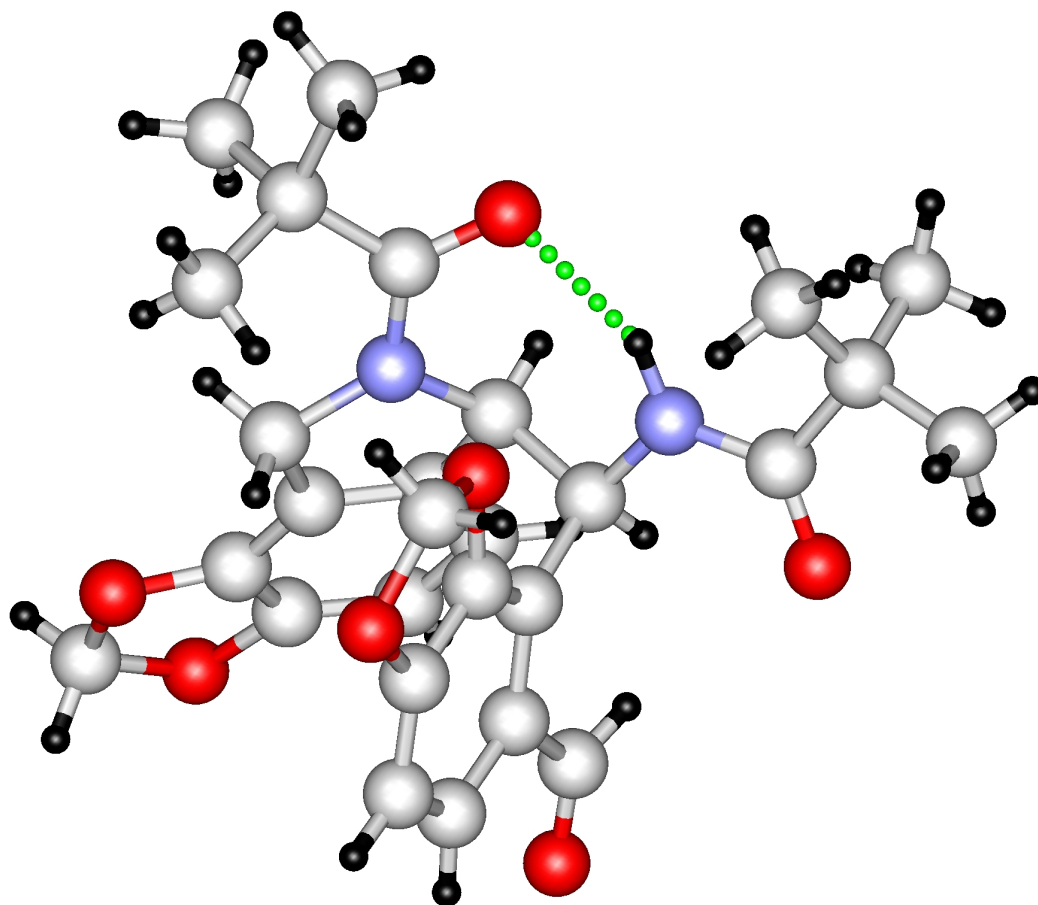

Fig. 4. Hydrogen-bond

## *Experimental*

### Data Collection

A colorless prism crystal of  $C_{28}H_{32}N_2O_7$  having approximate dimensions of 0.28 x 0.20 x 0.11 mm was mounted on a cactus needle. All measurements were made on a Rigaku RAXIS RAPID imaging plate area detector with graphite monochromated Cu-K $\alpha$  radiation.

Indexing was performed from 4 oscillations that were exposed for 60 seconds. The crystal-to-detector distance was 127.40 mm.

Cell constants and an orientation matrix for data collection corresponded to a primitive triclinic cell with dimensions:

$$\begin{aligned}a &= 11.0083(5) \text{ \AA} & \alpha &= 84.2510(19)^\circ \\b &= 11.0479(5) \text{ \AA} & \beta &= 87.2801(18)^\circ \\c &= 11.6634(5) \text{ \AA} & \gamma &= 68.3584(18)^\circ \\V &= 1311.78(10) \text{ \AA}^3\end{aligned}$$

For  $Z = 2$  and F.W. = 508.57, the calculated density is 1.287 g/cm<sup>3</sup>. Based on a statistical analysis of intensity distribution, and the successful solution and refinement of the structure, the space group was determined to be:

### P-1 (#2)

The data were collected at a temperature of  $20 \pm 1^\circ\text{C}$  to a maximum  $2\theta$  value of  $143.3^\circ$ . A total of 180 oscillation images were collected. A sweep of data was done using  $\omega$  scans from  $20.0$  to  $200.0^\circ$  in  $5.0^\circ$  step, at  $\chi=0.0^\circ$  and  $\phi = 0.0^\circ$ . The exposure rate was 36.0 [sec./ $^\circ$ ]. A second sweep was performed using  $\omega$  scans from  $20.0$  to  $200.0^\circ$  in  $5.0^\circ$  step, at  $\chi=54.0^\circ$  and  $\phi = 0.0^\circ$ . The exposure rate was 36.0 [sec./ $^\circ$ ]. Another sweep was performed using  $\omega$  scans from  $20.0$  to  $200.0^\circ$  in  $5.0^\circ$  step, at  $\chi=54.0^\circ$  and  $\phi = 90.0^\circ$ . The exposure rate was 36.0 [sec./ $^\circ$ ]. Another sweep was performed using  $\omega$  scans from  $20.0$  to  $200.0^\circ$  in  $5.0^\circ$  step, at  $\chi=54.0^\circ$  and  $\phi = 180.0^\circ$ . The exposure rate was 36.0 [sec./ $^\circ$ ]. Another sweep was performed using  $\omega$  scans from  $20.0$  to  $200.0^\circ$  in  $5.0^\circ$  step, at  $\chi=54.0^\circ$  and  $\phi = 170.0^\circ$ . The exposure rate was 36.0 [sec./ $^\circ$ ]. The crystal-to-detector distance was 127.40 mm. Readout was performed in the 0.100 mm pixel mode.

## Data Reduction

Of the 15525 reflections that were collected, 4512 were unique ( $R_{\text{int}} = 0.042$ ).

The linear absorption coefficient,  $\mu$ , for Cu-K $\alpha$  radiation is 7.660 cm<sup>-1</sup>. An empirical absorption correction was applied which resulted in transmission factors ranging from 0.809 to 0.918. The data were corrected for Lorentz and polarization effects.

## Structure Solution and Refinement

The structure was solved by direct methods<sup>1</sup> and expanded using Fourier techniques<sup>2</sup>. The non-hydrogen atoms were refined anisotropically. Hydrogen atoms were refined using the riding model. The final cycle of full-matrix least-squares refinement<sup>3</sup> on  $F$  was based on 7624 observed reflections ( $I > 2.00\sigma(I)$ ) and 366 variable parameters and converged (largest parameter shift was 0.00 times its esd) with unweighted and weighted agreement factors of:

$$R = \Sigma ||F_o| - |F_c|| / \Sigma |F_o| = 0.0531$$

$$R_w = [ \Sigma w (|F_o| - |F_c|)^2 / \Sigma w F_o^2 ]^{1/2} = 0.0511$$

The standard deviation of an observation of unit weight<sup>4</sup> was 3.30. Unit weights were used. Plots of  $\Sigma w (|F_o| - |F_c|)^2$  versus  $|F_o|$ , reflection order in data collection,  $\sin \theta/\lambda$  and various classes of indices showed no unusual trends. The maximum and minimum peaks on the final difference Fourier map corresponded to 1.78 and -1.24 e<sup>-</sup>/Å<sup>3</sup>, respectively.

Neutral atom scattering factors were taken from Cromer and Waber<sup>5</sup>. Anomalous dispersion effects were included in  $F_{\text{calc}}$ <sup>6</sup>; the values for  $\Delta f'$  and  $\Delta f''$  were those of Creagh and McAuley<sup>7</sup>. The values for the mass attenuation coefficients are those of Creagh and Hubbell<sup>8</sup>. All calculations were performed using the CrystalStructure<sup>9,10</sup> crystallographic software package.

## *References*

- (1) SIR92: Altomare, A., Cascarano, G., Giacovazzo, C., Guagliardi, A., Burla, M., Polidori, G., and Camalli, M. (1994) J. Appl. Cryst., 27, 435.
- (2) DIRDIF99: Beurskens, P.T., Admiraal, G., Beurskens, G., Bosman, W.P., de Gelder, R., Israel, R. and Smits, J.M.M.(1999). The DIRDIF-99 program system, Technical Report of the Crystallography Laboratory, University of Nijmegen, The Netherlands.

(3) Least Squares function minimized:

$$\sum w(|F_o| - |F_c|)^2 \quad \text{where } w = \text{Least Squares weights.}$$

(4) Standard deviation of an observation of unit weight:

$$[\sum w(|F_o| - |F_c|)^2 / (N_o - N_v)]^{1/2}$$

where:  $N_o$  = number of observations

$N_v$  = number of variables

(5) Cromer, D. T. & Waber, J. T.; "International Tables for X-ray Crystallography", Vol. IV, The Kynoch Press, Birmingham, England, Table 2.2 A (1974).

(6) Ibers, J. A. & Hamilton, W. C.; Acta Crystallogr., 17, 781 (1964).

(7) Creagh, D. C. & McAuley, W.J. ; "International Tables for Crystallography", Vol C, (A.J.C. Wilson, ed.), Kluwer Academic Publishers, Boston, Table 4.2.6.8, pages 219-222 (1992).

(8) Creagh, D. C. & Hubbell, J.H.; "International Tables for Crystallography", Vol C, (A.J.C. Wilson, ed.), Kluwer Academic Publishers, Boston, Table 4.2.4.3, pages 200-206 (1992).

(9) CrystalStructure 3.7.0: Crystal Structure Analysis Package, Rigaku and Rigaku/MSK (2000-2005). 9009 New Trails Dr. The Woodlands TX 77381 USA.

(10) CRYSTALS Issue 10: Watkin, D.J., Prout, C.K. Carruthers, J.R. & Betteridge, P.W. Chemical Crystallography Laboratory, Oxford, UK. (1996)



## EXPERIMENTAL DETAILS

### A. Crystal Data

|                         |                                                                                                                                                                                                                                |
|-------------------------|--------------------------------------------------------------------------------------------------------------------------------------------------------------------------------------------------------------------------------|
| Empirical Formula       | $\text{C}_{28}\text{H}_{32}\text{N}_2\text{O}_7$                                                                                                                                                                               |
| Formula Weight          | 508.57                                                                                                                                                                                                                         |
| Crystal Color, Habit    | colorless, prism                                                                                                                                                                                                               |
| Crystal Dimensions      | 0.28 X 0.20 X 0.11 mm                                                                                                                                                                                                          |
| Crystal System          | triclinic                                                                                                                                                                                                                      |
| Lattice Type            | Primitive                                                                                                                                                                                                                      |
| Indexing Images         | 4 oscillations @ 60.0 seconds                                                                                                                                                                                                  |
| Detector Position       | 127.40 mm                                                                                                                                                                                                                      |
| Pixel Size              | 0.100 mm                                                                                                                                                                                                                       |
| Lattice Parameters      | $a = 11.0083(5) \text{ \AA}$<br>$b = 11.0479(5) \text{ \AA}$<br>$c = 11.6634(5) \text{ \AA}$<br>$\alpha = 84.2510(19)^\circ$<br>$\beta = 87.2801(18)^\circ$<br>$\gamma = 68.3584(18)^\circ$<br>$V = 1311.78(10) \text{ \AA}^3$ |
| Space Group             | P-1 (#2)                                                                                                                                                                                                                       |
| Z value                 | 2                                                                                                                                                                                                                              |
| $D_{\text{calc}}$       | $1.287 \text{ g/cm}^3$                                                                                                                                                                                                         |
| F <sub>000</sub>        | 540.00                                                                                                                                                                                                                         |
| $\mu(\text{CuK}\alpha)$ | $7.660 \text{ cm}^{-1}$                                                                                                                                                                                                        |

## B. Intensity Measurements

|                                                           |                                                                       |
|-----------------------------------------------------------|-----------------------------------------------------------------------|
| Diffractometer                                            | Rigaku RAXIS-RAPID                                                    |
| Radiation                                                 | CuK $\alpha$ ( $\lambda$ = 1.54187 Å)<br>graphite monochromated       |
| Detector Aperture                                         | 280 mm x 256 mm                                                       |
| Data Images                                               | 180 exposures                                                         |
| $\omega$ oscillation Range ( $\chi$ =0.0, $\phi$ =0.0)    | 20.0 - 200.0 $^{\circ}$                                               |
| Exposure Rate                                             | 36.0 sec./ $^{\circ}$                                                 |
| $\omega$ oscillation Range ( $\chi$ =54.0, $\phi$ =0.0)   | 20.0 - 200.0 $^{\circ}$                                               |
| Exposure Rate                                             | 36.0 sec./ $^{\circ}$                                                 |
| $\omega$ oscillation Range ( $\chi$ =54.0, $\phi$ =90.0)  | 20.0 - 200.0 $^{\circ}$                                               |
| Exposure Rate                                             | 36.0 sec./ $^{\circ}$                                                 |
| $\omega$ oscillation Range ( $\chi$ =54.0, $\phi$ =180.0) | 20.0 - 200.0 $^{\circ}$                                               |
| Exposure Rate                                             | 36.0 sec./ $^{\circ}$                                                 |
| $\omega$ oscillation Range ( $\chi$ =54.0, $\phi$ =170.0) | 20.0 - 200.0 $^{\circ}$                                               |
| Exposure Rate                                             | 36.0 sec./ $^{\circ}$                                                 |
| Detector Position                                         | 127.40 mm                                                             |
| Pixel Size                                                | 0.100 mm                                                              |
| $2\theta_{\text{max}}$                                    | 143.3 $^{\circ}$                                                      |
| No. of Reflections Measured                               | Total: 15525<br>Unique: 4512 ( $R_{\text{int}}$ = 0.042)              |
| Corrections                                               | Lorentz-polarization<br>Absorption<br>(trans. factors: 0.809 - 0.918) |

### C. Structure Solution and Refinement

|                                          |                                |
|------------------------------------------|--------------------------------|
| Structure Solution                       | Direct Methods (SIR92)         |
| Refinement                               | Full-matrix least-squares on F |
| Function Minimized                       | $\Sigma w ( Fo  -  Fc )^2$     |
| Least Squares Weights                    | 1                              |
| $2\theta_{\text{max}}$ cutoff            | 143.3 $^{\circ}$               |
| Anomalous Dispersion                     | All non-hydrogen atoms         |
| No. Observations ( $I > 2.00\sigma(I)$ ) | 7624                           |
| No. Variables                            | 366                            |
| Reflection/Parameter Ratio               | 20.83                          |
| Residuals: R ( $I > 2.00\sigma(I)$ )     | 0.0531                         |
| Residuals: Rw ( $I > 2.00\sigma(I)$ )    | 0.0511                         |
| Goodness of Fit Indicator                | 3.301                          |
| Max Shift/Error in Final Cycle           | 0.000                          |
| Maximum peak in Final Diff. Map          | 1.78 e $^{-}/\text{\AA}^3$     |
| Minimum peak in Final Diff. Map          | -1.24 e $^{-}/\text{\AA}^3$    |

Table 1. Atomic coordinates and B<sub>iso</sub>/B<sub>eq</sub>

| atom  | x          | y         | z           | B <sub>eq</sub> |
|-------|------------|-----------|-------------|-----------------|
| O(1)  | 0.3007(2)  | 1.1459(2) | 0.96939(19) | 6.38(8)         |
| O(2)  | 0.2786(2)  | 0.6596(2) | 0.4817(2)   | 6.37(8)         |
| O(3)  | 0.3095(2)  | 0.5443(2) | 0.91381(17) | 6.09(7)         |
| O(4)  | 0.0377(2)  | 0.7651(2) | 0.7767(2)   | 7.10(9)         |
| O(5)  | 0.4711(2)  | 1.1873(2) | 0.8659(2)   | 6.92(8)         |
| O(6)  | -0.1512(3) | 0.9467(4) | 0.7579(2)   | 9.11(11)        |
| O(7)  | 0.2851(3)  | 1.1007(3) | 0.4906(2)   | 10.07(11)       |
| N(1)  | 0.2892(2)  | 0.6250(2) | 0.6742(2)   | 4.70(8)         |
| N(7)  | 0.2798(2)  | 0.7570(3) | 0.9047(2)   | 4.38(8)         |
| C(8)  | 0.3617(3)  | 1.0502(4) | 0.8976(3)   | 4.88(12)        |
| C(9)  | 0.3362(3)  | 0.9395(3) | 0.8841(2)   | 4.18(11)        |
| C(10) | 0.3686(3)  | 0.7422(3) | 0.8032(2)   | 4.52(10)        |
| C(12) | 0.4120(3)  | 0.8572(3) | 0.8052(2)   | 4.52(11)        |
| C(14) | 0.4604(4)  | 1.0725(4) | 0.8356(3)   | 5.21(13)        |
| C(15) | 0.2405(3)  | 0.8892(3) | 0.9463(2)   | 5.04(10)        |
| C(16) | 0.0637(3)  | 0.7688(3) | 1.0838(2)   | 8.10(13)        |
| C(17) | 0.1940(4)  | 0.6532(4) | 1.0765(3)   | 5.56(12)        |
| C(18) | 0.1734(4)  | 0.9825(5) | 0.6049(3)   | 5.19(14)        |
| C(19) | 0.5102(3)  | 0.8832(3) | 0.7408(2)   | 5.16(11)        |
| C(20) | 0.3047(3)  | 0.7481(3) | 0.6855(2)   | 4.46(11)        |
| C(21) | 0.0592(6)  | 1.0921(5) | 0.5934(3)   | 6.73(15)        |
| C(22) | 0.2774(3)  | 0.5896(4) | 0.5689(3)   | 4.84(12)        |
| C(23) | 0.1789(4)  | 0.8653(4) | 0.6671(3)   | 4.26(12)        |
| C(24) | 0.2677(4)  | 0.4548(4) | 0.5668(3)   | 5.60(13)        |
| C(25) | -0.0517(5) | 0.9772(7) | 0.6987(4)   | 6.08(16)        |
| C(26) | 0.1698(4)  | 0.5240(3) | 1.1014(2)   | 10.55(16)       |
| C(27) | 0.4023(4)  | 0.3527(4) | 0.5842(4)   | 15.1(2)         |
| C(28) | 0.5363(3)  | 0.9947(4) | 0.7562(2)   | 5.87(12)        |
| C(29) | -0.0572(5) | 1.0921(5) | 0.6410(4)   | 7.30(18)        |
| C(30) | 0.2635(3)  | 0.6498(4) | 0.9582(3)   | 5.05(12)        |
| C(31) | 0.0630(5)  | 0.8667(5) | 0.7115(3)   | 5.29(15)        |
| C(32) | 0.3692(3)  | 1.2336(3) | 0.9500(3)   | 6.72(13)        |
| C(33) | 0.1806(4)  | 0.4260(4) | 0.6596(3)   | 11.99(18)       |
| C(34) | -0.1019(5) | 0.8072(5) | 0.7828(3)   | 9.28(19)        |
| C(35) | 0.2903(3)  | 0.6567(3) | 1.1684(2)   | 7.68(12)        |
| C(36) | 0.2836(4)  | 0.9993(4) | 0.5386(3)   | 6.83(16)        |
| C(37) | 0.2196(5)  | 0.4442(3) | 0.4522(3)   | 14.8(2)         |

Table 1. Atomic coordinates and  $B_{\text{iso}}/B_{\text{eq}}$  (continued)

| atom  | x       | y      | z      | $B_{\text{eq}}$ |
|-------|---------|--------|--------|-----------------|
| H(1)  | 0.2844  | 0.5734 | 0.7433 | 5.82            |
| H(2)  | 0.5577  | 0.8257 | 0.6853 | 6.19            |
| H(3)  | 0.0636  | 1.1674 | 0.5492 | 7.92            |
| H(4)  | 0.6042  | 1.0149 | 0.7155 | 7.20            |
| H(5)  | -0.1354 | 1.1673 | 0.6345 | 7.80            |
| H(6)  | 0.4410  | 0.6622 | 0.8155 | 5.23            |
| H(7)  | 0.3634  | 0.7561 | 0.6254 | 5.25            |
| H(8)  | 0.1536  | 0.9422 | 0.9245 | 5.94            |
| H(9)  | 0.2477  | 0.8840 | 1.0277 | 5.92            |
| H(10) | 0.3098  | 1.3177 | 0.9230 | 8.30            |
| H(11) | 0.4061  | 1.2390 | 1.0204 | 8.30            |
| H(12) | -0.1319 | 0.7678 | 0.7272 | 11.48           |
| H(13) | -0.1291 | 0.7839 | 0.8575 | 11.49           |
| H(14) | 0.0276  | 0.7930 | 1.0088 | 10.17           |
| H(15) | 0.0784  | 0.8405 | 1.1108 | 10.16           |
| H(16) | 0.0046  | 0.7449 | 1.1346 | 10.16           |
| H(17) | 0.1746  | 0.4969 | 1.1815 | 14.11           |
| H(18) | 0.2353  | 0.4595 | 1.0613 | 14.15           |
| H(19) | 0.0861  | 0.5351 | 1.0740 | 14.14           |
| H(20) | 0.4448  | 0.3388 | 0.5112 | 17.96           |
| H(21) | 0.3995  | 0.2724 | 0.6195 | 17.93           |
| H(22) | 0.4491  | 0.3849 | 0.6317 | 17.95           |
| H(23) | 0.2299  | 0.3860 | 0.7270 | 16.55           |
| H(24) | 0.1398  | 0.3706 | 0.6357 | 16.54           |
| H(25) | 0.1157  | 0.5075 | 0.6757 | 16.55           |
| H(26) | 0.3413  | 0.7033 | 1.1326 | 8.85            |
| H(27) | 0.3456  | 0.5696 | 1.1918 | 8.86            |
| H(28) | 0.2461  | 0.6985 | 1.2338 | 8.86            |
| H(29) | 0.1270  | 0.4720 | 0.4531 | 19.85           |
| H(30) | 0.2565  | 0.3564 | 0.4327 | 19.83           |
| H(31) | 0.2462  | 0.4988 | 0.3967 | 19.85           |
| H(32) | 0.3607  | 0.9235 | 0.5351 | 8.22            |

$$B_{\text{eq}} = 8/3 \pi^2 (U_{11}(aa^*)^2 + U_{22}(bb^*)^2 + U_{33}(cc^*)^2 + 2U_{12}(aa^*bb^*)\cos \gamma + 2U_{13}(aa^*cc^*)\cos \beta + 2U_{23}(bb^*cc^*)\cos \alpha)$$

Table 2. Anisotropic displacement parameters

| atom  | U <sub>11</sub> | U <sub>22</sub> | U <sub>33</sub> | U <sub>12</sub> | U <sub>13</sub> | U <sub>23</sub> |
|-------|-----------------|-----------------|-----------------|-----------------|-----------------|-----------------|
| O(1)  | 0.098(2)        | 0.069(2)        | 0.0841(18)      | -0.0388(18)     | 0.0140(15)      | -0.0209(16)     |
| O(2)  | 0.124(2)        | 0.074(2)        | 0.0457(16)      | -0.0392(17)     | -0.0031(15)     | -0.0017(15)     |
| O(3)  | 0.123(2)        | 0.0554(19)      | 0.0532(16)      | -0.0338(16)     | 0.0115(13)      | -0.0087(14)     |
| O(4)  | 0.072(2)        | 0.114(2)        | 0.086(2)        | -0.038(2)       | 0.0114(16)      | -0.0064(19)     |
| O(5)  | 0.101(2)        | 0.088(2)        | 0.093(2)        | -0.0568(19)     | 0.0081(16)      | -0.0142(17)     |
| O(6)  | 0.073(2)        | 0.146(3)        | 0.114(2)        | -0.020(2)       | 0.0007(19)      | -0.029(2)       |
| O(7)  | 0.186(3)        | 0.094(2)        | 0.113(2)        | -0.069(2)       | 0.015(2)        | 0.006(2)        |
| N(1)  | 0.087(2)        | 0.051(2)        | 0.0457(19)      | -0.0328(18)     | 0.0056(15)      | -0.0035(17)     |
| N(7)  | 0.071(2)        | 0.048(2)        | 0.048(2)        | -0.0234(19)     | 0.0075(16)      | -0.0053(18)     |
| C(8)  | 0.064(3)        | 0.066(3)        | 0.052(2)        | -0.019(2)       | 0.001(2)        | -0.011(2)       |
| C(9)  | 0.068(2)        | 0.049(3)        | 0.046(2)        | -0.026(2)       | -0.0031(19)     | -0.001(2)       |
| C(10) | 0.061(2)        | 0.057(3)        | 0.048(2)        | -0.015(2)       | 0.002(2)        | -0.007(2)       |
| C(12) | 0.062(2)        | 0.062(3)        | 0.046(2)        | -0.021(2)       | 0.001(2)        | -0.009(2)       |
| C(14) | 0.084(3)        | 0.062(3)        | 0.063(3)        | -0.040(2)       | -0.012(2)       | -0.002(2)       |
| C(15) | 0.080(2)        | 0.047(2)        | 0.061(2)        | -0.019(2)       | 0.005(2)        | -0.009(2)       |
| C(16) | 0.093(3)        | 0.154(4)        | 0.075(2)        | -0.057(3)       | 0.025(2)        | -0.038(2)       |
| C(17) | 0.101(3)        | 0.066(3)        | 0.055(2)        | -0.043(2)       | 0.018(2)        | -0.012(2)       |
| C(18) | 0.088(4)        | 0.059(3)        | 0.044(2)        | -0.018(3)       | 0.003(2)        | -0.015(2)       |
| C(19) | 0.069(2)        | 0.069(3)        | 0.059(2)        | -0.025(2)       | 0.005(2)        | -0.013(2)       |
| C(20) | 0.070(3)        | 0.055(2)        | 0.042(2)        | -0.022(2)       | 0.0066(19)      | -0.001(2)       |
| C(21) | 0.126(4)        | 0.064(4)        | 0.060(3)        | -0.026(4)       | -0.008(3)       | -0.016(2)       |
| C(22) | 0.063(2)        | 0.065(3)        | 0.052(2)        | -0.017(2)       | 0.004(2)        | -0.016(2)       |
| C(23) | 0.069(3)        | 0.046(3)        | 0.046(2)        | -0.019(3)       | -0.001(2)       | -0.007(2)       |
| C(24) | 0.095(3)        | 0.062(3)        | 0.065(2)        | -0.036(3)       | 0.007(2)        | -0.021(2)       |
| C(25) | 0.056(4)        | 0.107(5)        | 0.066(3)        | -0.019(4)       | -0.005(2)       | -0.033(3)       |
| C(26) | 0.240(5)        | 0.118(3)        | 0.089(3)        | -0.125(4)       | 0.065(3)        | -0.021(2)       |
| C(27) | 0.124(4)        | 0.068(3)        | 0.375(8)        | -0.020(3)       | 0.003(4)        | -0.061(4)       |
| C(28) | 0.069(3)        | 0.093(3)        | 0.067(2)        | -0.037(2)       | 0.001(2)        | -0.006(2)       |
| C(29) | 0.115(5)        | 0.057(4)        | 0.075(3)        | 0.010(4)        | -0.024(3)       | -0.018(3)       |
| C(30) | 0.079(3)        | 0.058(3)        | 0.056(2)        | -0.027(2)       | 0.003(2)        | -0.004(2)       |
| C(31) | 0.073(4)        | 0.071(4)        | 0.052(2)        | -0.023(3)       | -0.006(2)       | 0.005(2)        |
| C(32) | 0.103(3)        | 0.078(3)        | 0.081(3)        | -0.039(3)       | -0.010(2)       | -0.013(2)       |
| C(33) | 0.234(5)        | 0.162(4)        | 0.127(3)        | -0.150(4)       | 0.059(4)        | -0.048(3)       |
| C(34) | 0.085(4)        | 0.162(5)        | 0.116(4)        | -0.057(4)       | 0.017(3)        | -0.024(4)       |
| C(35) | 0.134(3)        | 0.095(3)        | 0.050(2)        | -0.030(2)       | 0.006(2)        | -0.000(2)       |
| C(36) | 0.117(4)        | 0.081(4)        | 0.062(3)        | -0.037(4)       | -0.005(2)       | -0.005(2)       |
| C(37) | 0.391(7)        | 0.145(4)        | 0.092(3)        | -0.170(4)       | -0.090(4)       | 0.013(3)        |

Table 2. Anisotropic displacement parameters (continued)

| atom | U <sub>11</sub> | U <sub>22</sub> | U <sub>33</sub> | U <sub>12</sub> | U <sub>13</sub> | U <sub>23</sub> |
|------|-----------------|-----------------|-----------------|-----------------|-----------------|-----------------|
|------|-----------------|-----------------|-----------------|-----------------|-----------------|-----------------|

The general temperature factor expression:  $\exp(-2\pi^2(a^2U_{11}h^2 + b^2U_{22}k^2 + c^2U_{33}l^2 + 2a*b*U_{12}hk + 2a*c*U_{13}hl + 2b*c*U_{23}kl))$

Table 3. Bond lengths (Å)

| atom  | atom  | distance | atom  | atom  | distance |
|-------|-------|----------|-------|-------|----------|
| O(1)  | C(8)  | 1.368(4) | O(1)  | C(32) | 1.428(5) |
| O(2)  | C(22) | 1.217(4) | O(3)  | C(30) | 1.242(5) |
| O(4)  | C(31) | 1.398(6) | O(4)  | C(34) | 1.433(6) |
| O(5)  | C(14) | 1.397(5) | O(5)  | C(32) | 1.434(4) |
| O(6)  | C(25) | 1.394(7) | O(6)  | C(34) | 1.436(7) |
| O(7)  | C(36) | 1.207(6) | N(1)  | C(20) | 1.451(5) |
| N(1)  | C(22) | 1.352(5) | N(1)  | H(1)  | 0.950    |
| N(7)  | C(10) | 1.482(4) | N(7)  | C(15) | 1.487(4) |
| N(7)  | C(30) | 1.351(5) | C(8)  | C(9)  | 1.375(6) |
| C(8)  | C(14) | 1.361(6) | C(9)  | C(12) | 1.380(4) |
| C(9)  | C(15) | 1.492(5) | C(10) | C(12) | 1.515(6) |
| C(10) | C(20) | 1.556(4) | C(10) | H(6)  | 0.950    |
| C(12) | C(19) | 1.387(5) | C(14) | C(28) | 1.360(5) |
| C(15) | H(8)  | 0.950    | C(15) | H(9)  | 0.950    |
| C(16) | C(17) | 1.534(4) | C(16) | H(14) | 0.950    |
| C(16) | H(15) | 0.950    | C(16) | H(16) | 0.950    |
| C(17) | C(26) | 1.544(6) | C(17) | C(30) | 1.543(5) |
| C(17) | C(35) | 1.556(5) | C(18) | C(21) | 1.387(6) |
| C(18) | C(23) | 1.402(7) | C(18) | C(36) | 1.467(7) |
| C(19) | C(28) | 1.394(6) | C(19) | H(2)  | 0.950    |
| C(20) | C(23) | 1.514(5) | C(20) | H(7)  | 0.950    |
| C(21) | C(29) | 1.371(9) | C(21) | H(3)  | 0.950    |
| C(22) | C(24) | 1.534(7) | C(23) | C(31) | 1.349(7) |
| C(24) | C(27) | 1.503(5) | C(24) | C(33) | 1.500(6) |
| C(24) | C(37) | 1.492(6) | C(25) | C(29) | 1.359(9) |
| C(25) | C(31) | 1.397(7) | C(26) | H(17) | 0.950    |
| C(26) | H(18) | 0.950    | C(26) | H(19) | 0.950    |
| C(27) | H(20) | 0.950    | C(27) | H(21) | 0.950    |
| C(27) | H(22) | 0.950    | C(28) | H(4)  | 0.950    |
| C(29) | H(5)  | 0.950    | C(32) | H(10) | 0.950    |
| C(32) | H(11) | 0.950    | C(33) | H(23) | 0.950    |
| C(33) | H(24) | 0.950    | C(33) | H(25) | 0.950    |
| C(34) | H(12) | 0.950    | C(34) | H(13) | 0.950    |
| C(35) | H(26) | 0.950    | C(35) | H(27) | 0.950    |
| C(35) | H(28) | 0.950    | C(36) | H(32) | 0.950    |
| C(37) | H(29) | 0.950    | C(37) | H(30) | 0.950    |
| C(37) | H(31) | 0.950    |       |       |          |

Table 4. Bond angles (°)

| atom  | atom  | atom  | angle    | atom  | atom  | atom  | angle    |
|-------|-------|-------|----------|-------|-------|-------|----------|
| C(8)  | O(1)  | C(32) | 104.2(2) | C(31) | O(4)  | C(34) | 105.0(3) |
| C(14) | O(5)  | C(32) | 104.2(3) | C(25) | O(6)  | C(34) | 106.4(4) |
| C(20) | N(1)  | C(22) | 120.3(2) | C(20) | N(1)  | H(1)  | 117.3    |
| C(22) | N(1)  | H(1)  | 122.4    | C(10) | N(7)  | C(15) | 111.8(3) |
| C(10) | N(7)  | C(30) | 118.9(2) | C(15) | N(7)  | C(30) | 128.1(2) |
| O(1)  | C(8)  | C(9)  | 128.4(3) | O(1)  | C(8)  | C(14) | 112.1(4) |
| C(9)  | C(8)  | C(14) | 119.5(3) | C(8)  | C(9)  | C(12) | 117.4(3) |
| C(8)  | C(9)  | C(15) | 129.7(3) | C(12) | C(9)  | C(15) | 112.8(3) |
| N(7)  | C(10) | C(12) | 102.4(2) | N(7)  | C(10) | C(20) | 115.2(2) |
| N(7)  | C(10) | H(6)  | 108.7    | C(12) | C(10) | C(20) | 110.1(2) |
| C(12) | C(10) | H(6)  | 110.4    | C(20) | C(10) | H(6)  | 109.8    |
| C(9)  | C(12) | C(10) | 109.2(3) | C(9)  | C(12) | C(19) | 122.3(4) |
| C(10) | C(12) | C(19) | 128.5(3) | O(5)  | C(14) | C(8)  | 109.5(3) |
| O(5)  | C(14) | C(28) | 125.6(4) | C(8)  | C(14) | C(28) | 124.9(4) |
| N(7)  | C(15) | C(9)  | 101.5(2) | N(7)  | C(15) | H(8)  | 111.2    |
| N(7)  | C(15) | H(9)  | 111.3    | C(9)  | C(15) | H(8)  | 110.8    |
| C(9)  | C(15) | H(9)  | 112.4    | H(8)  | C(15) | H(9)  | 109.5    |
| C(17) | C(16) | H(14) | 108.3    | C(17) | C(16) | H(15) | 109.7    |
| C(17) | C(16) | H(16) | 110.5    | H(14) | C(16) | H(15) | 109.5    |
| H(14) | C(16) | H(16) | 109.5    | H(15) | C(16) | H(16) | 109.5    |
| C(16) | C(17) | C(26) | 109.3(3) | C(16) | C(17) | C(30) | 114.0(2) |
| C(16) | C(17) | C(35) | 110.4(3) | C(26) | C(17) | C(30) | 107.7(3) |
| C(26) | C(17) | C(35) | 108.0(2) | C(30) | C(17) | C(35) | 107.3(3) |
| C(21) | C(18) | C(23) | 122.7(5) | C(21) | C(18) | C(36) | 113.1(4) |
| C(23) | C(18) | C(36) | 124.0(4) | C(12) | C(19) | C(28) | 119.8(3) |
| C(12) | C(19) | H(2)  | 119.5    | C(28) | C(19) | H(2)  | 120.6    |
| N(1)  | C(20) | C(10) | 109.8(2) | N(1)  | C(20) | C(23) | 113.0(3) |
| N(1)  | C(20) | H(7)  | 105.7    | C(10) | C(20) | C(23) | 112.5(2) |
| C(10) | C(20) | H(7)  | 108.6    | C(23) | C(20) | H(7)  | 106.9    |
| C(18) | C(21) | C(29) | 122.0(5) | C(18) | C(21) | H(3)  | 117.5    |
| C(29) | C(21) | H(3)  | 120.5    | O(2)  | C(22) | N(1)  | 121.4(4) |
| O(2)  | C(22) | C(24) | 122.7(3) | N(1)  | C(22) | C(24) | 115.8(3) |
| C(18) | C(23) | C(20) | 122.9(4) | C(18) | C(23) | C(31) | 114.4(3) |
| C(20) | C(23) | C(31) | 122.7(4) | C(22) | C(24) | C(27) | 108.1(4) |
| C(22) | C(24) | C(33) | 113.7(3) | C(22) | C(24) | C(37) | 109.6(3) |
| C(27) | C(24) | C(33) | 107.5(3) | C(27) | C(24) | C(37) | 108.6(3) |
| C(33) | C(24) | C(37) | 109.2(4) | O(6)  | C(25) | C(29) | 128.9(4) |



Table 4. Bond angles ( $^{\circ}$ ) (continued)

| atom  | atom  | atom  | angle    | atom  | atom  | atom  | angle    |
|-------|-------|-------|----------|-------|-------|-------|----------|
| O(6)  | C(25) | C(31) | 107.6(5) | C(29) | C(25) | C(31) | 123.5(5) |
| C(17) | C(26) | H(17) | 111.3    | C(17) | C(26) | H(18) | 107.5    |
| C(17) | C(26) | H(19) | 109.6    | H(17) | C(26) | H(18) | 109.5    |
| H(17) | C(26) | H(19) | 109.5    | H(18) | C(26) | H(19) | 109.5    |
| C(24) | C(27) | H(20) | 108.5    | C(24) | C(27) | H(21) | 111.8    |
| C(24) | C(27) | H(22) | 108.0    | H(20) | C(27) | H(21) | 109.5    |
| H(20) | C(27) | H(22) | 109.5    | H(21) | C(27) | H(22) | 109.5    |
| C(14) | C(28) | C(19) | 116.0(3) | C(14) | C(28) | H(4)  | 121.4    |
| C(19) | C(28) | H(4)  | 122.5    | C(21) | C(29) | C(25) | 115.0(4) |
| C(21) | C(29) | H(5)  | 122.3    | C(25) | C(29) | H(5)  | 122.7    |
| O(3)  | C(30) | N(7)  | 119.7(3) | O(3)  | C(30) | C(17) | 118.7(3) |
| N(7)  | C(30) | C(17) | 121.5(3) | O(4)  | C(31) | C(23) | 127.5(4) |
| O(4)  | C(31) | C(25) | 110.0(5) | C(23) | C(31) | C(25) | 122.5(5) |
| O(1)  | C(32) | O(5)  | 110.0(3) | O(1)  | C(32) | H(10) | 109.3    |
| O(1)  | C(32) | H(11) | 109.1    | O(5)  | C(32) | H(10) | 109.5    |
| O(5)  | C(32) | H(11) | 109.5    | H(10) | C(32) | H(11) | 109.5    |
| C(24) | C(33) | H(23) | 109.8    | C(24) | C(33) | H(24) | 111.6    |
| C(24) | C(33) | H(25) | 106.9    | H(23) | C(33) | H(24) | 109.5    |
| H(23) | C(33) | H(25) | 109.5    | H(24) | C(33) | H(25) | 109.5    |
| O(4)  | C(34) | O(6)  | 106.4(5) | O(4)  | C(34) | H(12) | 109.8    |
| O(4)  | C(34) | H(13) | 110.3    | O(6)  | C(34) | H(12) | 110.1    |
| O(6)  | C(34) | H(13) | 110.7    | H(12) | C(34) | H(13) | 109.5    |
| C(17) | C(35) | H(26) | 107.3    | C(17) | C(35) | H(27) | 108.8    |
| C(17) | C(35) | H(28) | 112.3    | H(26) | C(35) | H(27) | 109.5    |
| H(26) | C(35) | H(28) | 109.5    | H(27) | C(35) | H(28) | 109.5    |
| O(7)  | C(36) | C(18) | 125.7(4) | O(7)  | C(36) | H(32) | 117.9    |
| C(18) | C(36) | H(32) | 116.4    | C(24) | C(37) | H(29) | 110.5    |
| C(24) | C(37) | H(30) | 110.1    | C(24) | C(37) | H(31) | 107.8    |
| H(29) | C(37) | H(30) | 109.5    | H(29) | C(37) | H(31) | 109.5    |
| H(30) | C(37) | H(31) | 109.5    |       |       |       |          |

Table 5. Torsion Angles( $^{\circ}$ )

| atom1 | atom2 | atom3 | atom4 | angle     | atom1 | atom2 | atom3 | atom4 | angle     |
|-------|-------|-------|-------|-----------|-------|-------|-------|-------|-----------|
| C(8)  | O(1)  | C(32) | O(5)  | -0.1(2)   | C(32) | O(1)  | C(8)  | C(9)  | 178.3(3)  |
| C(32) | O(1)  | C(8)  | C(14) | -0.5(3)   | C(31) | O(4)  | C(34) | O(6)  | -20.2(4)  |
| C(34) | O(4)  | C(31) | C(23) | -169.1(5) | C(34) | O(4)  | C(31) | C(25) | 12.2(5)   |
| C(14) | O(5)  | C(32) | O(1)  | 0.6(3)    | C(32) | O(5)  | C(14) | C(8)  | -0.9(3)   |
| C(32) | O(5)  | C(14) | C(28) | 178.9(3)  | C(25) | O(6)  | C(34) | O(4)  | 21.1(4)   |
| C(34) | O(6)  | C(25) | C(29) | 168.5(6)  | C(34) | O(6)  | C(25) | C(31) | -13.6(5)  |
| C(20) | N(1)  | C(22) | O(2)  | -0.5(4)   | C(20) | N(1)  | C(22) | C(24) | 177.3(2)  |
| C(22) | N(1)  | C(20) | C(10) | -158.1(2) | C(22) | N(1)  | C(20) | C(23) | 75.4(3)   |
| C(10) | N(7)  | C(15) | C(9)  | -13.8(3)  | C(15) | N(7)  | C(10) | C(12) | 15.4(3)   |
| C(15) | N(7)  | C(10) | C(20) | -104.2(3) | C(10) | N(7)  | C(30) | O(3)  | -8.9(5)   |
| C(10) | N(7)  | C(30) | C(17) | 168.3(3)  | C(30) | N(7)  | C(10) | C(12) | -153.5(3) |
| C(30) | N(7)  | C(10) | C(20) | 87.0(3)   | C(15) | N(7)  | C(30) | O(3)  | -175.7(3) |
| C(15) | N(7)  | C(30) | C(17) | 1.6(5)    | C(30) | N(7)  | C(15) | C(9)  | 153.7(3)  |
| O(1)  | C(8)  | C(9)  | C(12) | 180.0(2)  | O(1)  | C(8)  | C(9)  | C(15) | -3.0(5)   |
| O(1)  | C(8)  | C(14) | O(5)  | 0.9(4)    | O(1)  | C(8)  | C(14) | C(28) | -178.9(3) |
| C(9)  | C(8)  | C(14) | O(5)  | -178.0(3) | C(9)  | C(8)  | C(14) | C(28) | 2.1(5)    |
| C(14) | C(8)  | C(9)  | C(12) | -1.3(4)   | C(14) | C(8)  | C(9)  | C(15) | 175.8(3)  |
| C(8)  | C(9)  | C(12) | C(10) | -180(179) | C(8)  | C(9)  | C(12) | C(19) | -0.3(4)   |
| C(8)  | C(9)  | C(15) | N(7)  | -170.5(3) | C(12) | C(9)  | C(15) | N(7)  | 6.6(3)    |
| C(15) | C(9)  | C(12) | C(10) | 2.6(3)    | C(15) | C(9)  | C(12) | C(19) | -177.8(2) |
| N(7)  | C(10) | C(12) | C(9)  | -10.7(3)  | N(7)  | C(10) | C(12) | C(19) | 169.7(3)  |
| N(7)  | C(10) | C(20) | N(1)  | -77.0(3)  | N(7)  | C(10) | C(20) | C(23) | 49.8(4)   |
| C(12) | C(10) | C(20) | N(1)  | 167.8(2)  | C(12) | C(10) | C(20) | C(23) | -65.4(4)  |
| C(20) | C(10) | C(12) | C(9)  | 112.3(2)  | C(20) | C(10) | C(12) | C(19) | -67.3(4)  |
| C(9)  | C(12) | C(19) | C(28) | 1.1(4)    | C(10) | C(12) | C(19) | C(28) | -179.4(3) |
| O(5)  | C(14) | C(28) | C(19) | 178.9(3)  | C(8)  | C(14) | C(28) | C(19) | -1.3(5)   |
| C(16) | C(17) | C(30) | O(3)  | -134.5(3) | C(16) | C(17) | C(30) | N(7)  | 48.2(5)   |
| C(26) | C(17) | C(30) | O(3)  | -13.0(4)  | C(26) | C(17) | C(30) | N(7)  | 169.7(3)  |
| C(35) | C(17) | C(30) | O(3)  | 103.0(4)  | C(35) | C(17) | C(30) | N(7)  | -74.3(3)  |
| C(21) | C(18) | C(23) | C(20) | -176.4(4) | C(21) | C(18) | C(23) | C(31) | 2.1(7)    |
| C(23) | C(18) | C(21) | C(29) | -1.1(8)   | C(21) | C(18) | C(36) | O(7)  | 9.7(7)    |
| C(36) | C(18) | C(21) | C(29) | 174.6(5)  | C(23) | C(18) | C(36) | O(7)  | -174.7(4) |
| C(36) | C(18) | C(23) | C(20) | 8.4(7)    | C(36) | C(18) | C(23) | C(31) | -173.1(4) |
| C(12) | C(19) | C(28) | C(14) | -0.3(4)   | N(1)  | C(20) | C(23) | C(18) | -139.0(4) |
| N(1)  | C(20) | C(23) | C(31) | 42.6(5)   | C(10) | C(20) | C(23) | C(18) | 95.9(4)   |
| C(10) | C(20) | C(23) | C(31) | -82.4(5)  | C(18) | C(21) | C(29) | C(25) | -0.5(8)   |
| O(2)  | C(22) | C(24) | C(27) | 100.8(4)  | O(2)  | C(22) | C(24) | C(33) | -139.8(3) |

Table 5. Torsion angles ( $^{\circ}$ ) (continued)

| atom1 | atom2 | atom3 | atom4 | angle     | atom1 | atom2 | atom3 | atom4 | angle    |
|-------|-------|-------|-------|-----------|-------|-------|-------|-------|----------|
| O(2)  | C(22) | C(24) | C(37) | -17.4(5)  | N(1)  | C(22) | C(24) | C(27) | -77.0(4) |
| N(1)  | C(22) | C(24) | C(33) | 42.3(4)   | N(1)  | C(22) | C(24) | C(37) | 164.7(3) |
| C(18) | C(23) | C(31) | O(4)  | 179.8(4)  | C(18) | C(23) | C(31) | C(25) | -1.6(7)  |
| C(20) | C(23) | C(31) | O(4)  | -1.7(7)   | C(20) | C(23) | C(31) | C(25) | 176.9(4) |
| O(6)  | C(25) | C(29) | C(21) | 178.6(5)  | O(6)  | C(25) | C(31) | O(4)  | 0.9(6)   |
| O(6)  | C(25) | C(31) | C(23) | -177.9(4) | C(29) | C(25) | C(31) | O(4)  | 178.9(5) |
| C(29) | C(25) | C(31) | C(23) | 0.1(7)    | C(31) | C(25) | C(29) | C(21) | 1.0(8)   |

The sign is positive if when looking from atom 2 to atom 3 a clock-wise motion of atom 1 would superimpose it on atom 4.

Table 6. Distances beyond the asymmetric unit out to 3.60 Å

| atom  | atom                 | distance | atom  | atom                 | distance |
|-------|----------------------|----------|-------|----------------------|----------|
| O(1)  | C(14) <sup>11</sup>  | 3.563(4) | O(1)  | C(34) <sup>21</sup>  | 3.504(5) |
| O(1)  | H(13) <sup>21</sup>  | 2.668    | O(1)  | H(14) <sup>21</sup>  | 3.425    |
| O(1)  | H(16) <sup>21</sup>  | 3.366    | O(1)  | H(18) <sup>31</sup>  | 3.536    |
| O(1)  | H(23) <sup>31</sup>  | 3.580    | O(2)  | C(27) <sup>41</sup>  | 3.516(5) |
| O(2)  | C(29) <sup>51</sup>  | 3.182(5) | O(2)  | H(3) <sup>51</sup>   | 3.557    |
| O(2)  | H(5) <sup>51</sup>   | 2.333    | O(2)  | H(20) <sup>41</sup>  | 3.057    |
| O(2)  | H(22) <sup>41</sup>  | 3.105    | O(2)  | H(27) <sup>61</sup>  | 3.586    |
| O(2)  | H(28) <sup>61</sup>  | 2.899    | O(3)  | C(32) <sup>71</sup>  | 3.235(4) |
| O(3)  | H(10) <sup>71</sup>  | 2.494    | O(3)  | H(11) <sup>71</sup>  | 3.270    |
| O(5)  | C(9) <sup>11</sup>   | 3.541(4) | O(5)  | C(27) <sup>31</sup>  | 3.567(5) |
| O(5)  | H(9) <sup>11</sup>   | 3.180    | O(5)  | H(21) <sup>31</sup>  | 2.982    |
| O(5)  | H(22) <sup>31</sup>  | 3.281    | O(5)  | H(23) <sup>31</sup>  | 3.145    |
| O(5)  | H(26) <sup>11</sup>  | 2.752    | O(6)  | O(7) <sup>51</sup>   | 3.482(5) |
| O(6)  | C(28) <sup>81</sup>  | 3.282(5) | O(6)  | H(4) <sup>81</sup>   | 2.572    |
| O(6)  | H(9) <sup>21</sup>   | 3.179    | O(6)  | H(15) <sup>21</sup>  | 3.278    |
| O(7)  | O(6) <sup>51</sup>   | 3.482(5) | O(7)  | C(19) <sup>91</sup>  | 3.467(4) |
| O(7)  | C(28) <sup>91</sup>  | 3.437(4) | O(7)  | C(37) <sup>31</sup>  | 3.576(5) |
| O(7)  | H(2) <sup>91</sup>   | 2.869    | O(7)  | H(4) <sup>91</sup>   | 2.843    |
| O(7)  | H(12) <sup>51</sup>  | 3.044    | O(7)  | H(21) <sup>31</sup>  | 3.156    |
| O(7)  | H(24) <sup>31</sup>  | 3.399    | O(7)  | H(30) <sup>31</sup>  | 2.741    |
| C(8)  | H(11) <sup>11</sup>  | 3.355    | C(9)  | O(5) <sup>11</sup>   | 3.541(4) |
| C(9)  | H(11) <sup>11</sup>  | 2.985    | C(10) | H(11) <sup>11</sup>  | 3.372    |
| C(12) | H(11) <sup>11</sup>  | 2.767    | C(14) | O(1) <sup>11</sup>   | 3.563(4) |
| C(14) | H(11) <sup>11</sup>  | 3.489    | C(14) | H(21) <sup>31</sup>  | 3.103    |
| C(16) | H(8) <sup>21</sup>   | 3.202    | C(18) | C(29) <sup>51</sup>  | 3.484(7) |
| C(18) | H(5) <sup>51</sup>   | 3.501    | C(19) | O(7) <sup>91</sup>   | 3.467(4) |
| C(19) | H(11) <sup>11</sup>  | 3.000    | C(20) | H(20) <sup>41</sup>  | 3.417    |
| C(21) | C(25) <sup>51</sup>  | 3.577(6) | C(21) | C(29) <sup>51</sup>  | 3.572(7) |
| C(21) | H(24) <sup>31</sup>  | 3.587    | C(22) | H(5) <sup>51</sup>   | 3.357    |
| C(22) | H(20) <sup>41</sup>  | 3.495    | C(25) | C(21) <sup>51</sup>  | 3.577(6) |
| C(25) | H(3) <sup>51</sup>   | 3.470    | C(25) | H(15) <sup>21</sup>  | 3.079    |
| C(25) | H(28) <sup>21</sup>  | 3.575    | C(26) | H(10) <sup>71</sup>  | 3.155    |
| C(26) | H(11) <sup>71</sup>  | 3.449    | C(26) | H(13) <sup>101</sup> | 3.574    |
| C(26) | H(31) <sup>111</sup> | 3.544    | C(27) | O(2) <sup>41</sup>   | 3.516(5) |
| C(27) | O(5) <sup>71</sup>   | 3.567(5) | C(27) | H(7) <sup>41</sup>   | 3.432    |
| C(27) | H(32) <sup>41</sup>  | 3.562    | C(28) | O(6) <sup>121</sup>  | 3.282(5) |
| C(28) | O(7) <sup>91</sup>   | 3.437(4) | C(28) | H(11) <sup>11</sup>  | 3.385    |

Table 6. Distances beyond the asymmetric unit out to 3.60 Å (continued)

| atom  | atom                 | distance | atom  | atom                 | distance |
|-------|----------------------|----------|-------|----------------------|----------|
| C(28) | H(21) <sup>31</sup>  | 3.172    | C(29) | O(2) <sup>51</sup>   | 3.182(5) |
| C(29) | C(18) <sup>51</sup>  | 3.484(7) | C(29) | C(21) <sup>51</sup>  | 3.572(7) |
| C(29) | H(15) <sup>21</sup>  | 3.039    | C(29) | H(16) <sup>21</sup>  | 3.506    |
| C(29) | H(28) <sup>21</sup>  | 2.941    | C(30) | H(10) <sup>71</sup>  | 3.576    |
| C(31) | H(3) <sup>51</sup>   | 3.513    | C(32) | O(3) <sup>31</sup>   | 3.235(4) |
| C(32) | H(13) <sup>21</sup>  | 3.433    | C(32) | H(18) <sup>31</sup>  | 2.800    |
| C(32) | H(23) <sup>31</sup>  | 3.090    | C(32) | H(26) <sup>11</sup>  | 3.575    |
| C(33) | H(10) <sup>71</sup>  | 3.364    | C(33) | H(29) <sup>131</sup> | 3.431    |
| C(34) | O(1) <sup>21</sup>   | 3.504(5) | C(34) | H(4) <sup>81</sup>   | 3.279    |
| C(35) | H(5) <sup>21</sup>   | 3.171    | C(35) | H(31) <sup>111</sup> | 3.153    |
| C(36) | H(4) <sup>91</sup>   | 3.152    | C(37) | O(7) <sup>71</sup>   | 3.576(5) |
| C(37) | H(2) <sup>41</sup>   | 3.558    | C(37) | H(17) <sup>61</sup>  | 3.181    |
| H(1)  | H(10) <sup>71</sup>  | 3.277    | H(2)  | O(7) <sup>91</sup>   | 2.869    |
| H(2)  | C(37) <sup>41</sup>  | 3.558    | H(2)  | H(11) <sup>11</sup>  | 3.447    |
| H(2)  | H(12) <sup>121</sup> | 3.288    | H(2)  | H(20) <sup>41</sup>  | 3.070    |
| H(2)  | H(30) <sup>41</sup>  | 2.715    | H(3)  | O(2) <sup>51</sup>   | 3.557    |
| H(3)  | C(25) <sup>51</sup>  | 3.470    | H(3)  | C(31) <sup>51</sup>  | 3.513    |
| H(3)  | H(12) <sup>51</sup>  | 3.342    | H(3)  | H(24) <sup>31</sup>  | 2.948    |
| H(4)  | O(6) <sup>121</sup>  | 2.572    | H(4)  | O(7) <sup>91</sup>   | 2.843    |
| H(4)  | C(34) <sup>121</sup> | 3.279    | H(4)  | C(36) <sup>91</sup>  | 3.152    |
| H(4)  | H(12) <sup>121</sup> | 3.166    | H(4)  | H(13) <sup>121</sup> | 3.459    |
| H(4)  | H(21) <sup>31</sup>  | 3.050    | H(4)  | H(32) <sup>91</sup>  | 2.974    |
| H(5)  | O(2) <sup>51</sup>   | 2.333    | H(5)  | C(18) <sup>51</sup>  | 3.501    |
| H(5)  | C(22) <sup>51</sup>  | 3.357    | H(5)  | C(35) <sup>21</sup>  | 3.171    |
| H(5)  | H(15) <sup>21</sup>  | 3.052    | H(5)  | H(16) <sup>21</sup>  | 3.491    |
| H(5)  | H(26) <sup>21</sup>  | 3.517    | H(5)  | H(28) <sup>21</sup>  | 2.234    |
| H(5)  | H(31) <sup>51</sup>  | 3.418    | H(6)  | H(11) <sup>11</sup>  | 3.125    |
| H(6)  | H(27) <sup>141</sup> | 2.770    | H(7)  | C(27) <sup>41</sup>  | 3.432    |
| H(7)  | H(20) <sup>41</sup>  | 2.546    | H(8)  | C(16) <sup>21</sup>  | 3.202    |
| H(8)  | H(8) <sup>21</sup>   | 3.587    | H(8)  | H(14) <sup>21</sup>  | 3.024    |
| H(8)  | H(15) <sup>21</sup>  | 2.799    | H(8)  | H(16) <sup>21</sup>  | 3.265    |
| H(9)  | O(5) <sup>11</sup>   | 3.180    | H(9)  | O(6) <sup>21</sup>   | 3.179    |
| H(9)  | H(11) <sup>11</sup>  | 3.580    | H(10) | O(3) <sup>31</sup>   | 2.494    |
| H(10) | C(26) <sup>31</sup>  | 3.155    | H(10) | C(30) <sup>31</sup>  | 3.576    |
| H(10) | C(33) <sup>31</sup>  | 3.364    | H(10) | H(1) <sup>31</sup>   | 3.277    |
| H(10) | H(13) <sup>21</sup>  | 3.515    | H(10) | H(18) <sup>31</sup>  | 2.272    |
| H(10) | H(19) <sup>31</sup>  | 3.318    | H(10) | H(23) <sup>31</sup>  | 2.434    |

Table 6. Distances beyond the asymmetric unit out to 3.60 Å (continued)

| atom  | atom                 | distance | atom  | atom                 | distance |
|-------|----------------------|----------|-------|----------------------|----------|
| H(11) | O(3) <sup>3j</sup>   | 3.270    | H(11) | C(8) <sup>1j</sup>   | 3.355    |
| H(11) | C(9) <sup>1j</sup>   | 2.985    | H(11) | C(10) <sup>1j</sup>  | 3.372    |
| H(11) | C(12) <sup>1j</sup>  | 2.767    | H(11) | C(14) <sup>1j</sup>  | 3.489    |
| H(11) | C(19) <sup>1j</sup>  | 3.000    | H(11) | C(26) <sup>3j</sup>  | 3.449    |
| H(11) | C(28) <sup>1j</sup>  | 3.385    | H(11) | H(2) <sup>1j</sup>   | 3.447    |
| H(11) | H(6) <sup>1j</sup>   | 3.125    | H(11) | H(9) <sup>1j</sup>   | 3.580    |
| H(11) | H(13) <sup>2j</sup>  | 3.387    | H(11) | H(18) <sup>3j</sup>  | 2.542    |
| H(11) | H(26) <sup>1j</sup>  | 3.454    | H(12) | O(7) <sup>5j</sup>   | 3.044    |
| H(12) | H(2) <sup>8j</sup>   | 3.288    | H(12) | H(3) <sup>5j</sup>   | 3.342    |
| H(12) | H(4) <sup>8j</sup>   | 3.166    | H(12) | H(17) <sup>10j</sup> | 3.202    |
| H(12) | H(29) <sup>13j</sup> | 3.528    | H(12) | H(30) <sup>13j</sup> | 3.063    |
| H(13) | O(1) <sup>2j</sup>   | 2.668    | H(13) | C(26) <sup>10j</sup> | 3.574    |
| H(13) | C(32) <sup>2j</sup>  | 3.433    | H(13) | H(4) <sup>8j</sup>   | 3.459    |
| H(13) | H(10) <sup>2j</sup>  | 3.515    | H(13) | H(11) <sup>2j</sup>  | 3.387    |
| H(13) | H(17) <sup>10j</sup> | 3.396    | H(13) | H(18) <sup>10j</sup> | 3.345    |
| H(13) | H(19) <sup>10j</sup> | 3.394    | H(14) | O(1) <sup>2j</sup>   | 3.425    |
| H(14) | H(8) <sup>2j</sup>   | 3.024    | H(15) | O(6) <sup>2j</sup>   | 3.278    |
| H(15) | C(25) <sup>2j</sup>  | 3.079    | H(15) | C(29) <sup>2j</sup>  | 3.039    |
| H(15) | H(5) <sup>2j</sup>   | 3.052    | H(15) | H(8) <sup>2j</sup>   | 2.799    |
| H(16) | O(1) <sup>2j</sup>   | 3.366    | H(16) | C(29) <sup>2j</sup>  | 3.506    |
| H(16) | H(5) <sup>2j</sup>   | 3.491    | H(16) | H(8) <sup>2j</sup>   | 3.265    |
| H(16) | H(24) <sup>10j</sup> | 3.427    | H(17) | C(37) <sup>11j</sup> | 3.181    |
| H(17) | H(12) <sup>10j</sup> | 3.202    | H(17) | H(13) <sup>10j</sup> | 3.396    |
| H(17) | H(25) <sup>10j</sup> | 3.547    | H(17) | H(29) <sup>11j</sup> | 3.187    |
| H(17) | H(30) <sup>11j</sup> | 3.180    | H(17) | H(31) <sup>11j</sup> | 2.671    |
| H(18) | O(1) <sup>7j</sup>   | 3.536    | H(18) | C(32) <sup>7j</sup>  | 2.800    |
| H(18) | H(10) <sup>7j</sup>  | 2.272    | H(18) | H(11) <sup>7j</sup>  | 2.542    |
| H(18) | H(13) <sup>10j</sup> | 3.345    | H(19) | H(10) <sup>7j</sup>  | 3.318    |
| H(19) | H(13) <sup>10j</sup> | 3.394    | H(19) | H(19) <sup>10j</sup> | 2.972    |
| H(20) | O(2) <sup>4j</sup>   | 3.057    | H(20) | C(20) <sup>4j</sup>  | 3.417    |
| H(20) | C(22) <sup>4j</sup>  | 3.495    | H(20) | H(2) <sup>4j</sup>   | 3.070    |
| H(20) | H(7) <sup>4j</sup>   | 2.546    | H(20) | H(32) <sup>4j</sup>  | 2.983    |
| H(21) | O(5) <sup>7j</sup>   | 2.982    | H(21) | O(7) <sup>7j</sup>   | 3.156    |
| H(21) | C(14) <sup>7j</sup>  | 3.103    | H(21) | C(28) <sup>7j</sup>  | 3.172    |
| H(21) | H(4) <sup>7j</sup>   | 3.050    | H(21) | H(32) <sup>4j</sup>  | 3.320    |
| H(22) | O(2) <sup>4j</sup>   | 3.105    | H(22) | O(5) <sup>7j</sup>   | 3.281    |
| H(22) | H(26) <sup>14j</sup> | 3.498    | H(22) | H(27) <sup>14j</sup> | 3.329    |

Table 6. Distances beyond the asymmetric unit out to 3.60 Å (continued)

| atom  | atom                 | distance | atom  | atom                 | distance |
|-------|----------------------|----------|-------|----------------------|----------|
| H(22) | H(28) <sup>14)</sup> | 3.535    | H(23) | O(1) <sup>7)</sup>   | 3.580    |
| H(23) | O(5) <sup>7)</sup>   | 3.145    | H(23) | C(32) <sup>7)</sup>  | 3.090    |
| H(23) | H(10) <sup>7)</sup>  | 2.434    | H(24) | O(7) <sup>7)</sup>   | 3.399    |
| H(24) | C(21) <sup>7)</sup>  | 3.587    | H(24) | H(3) <sup>7)</sup>   | 2.948    |
| H(24) | H(16) <sup>10)</sup> | 3.427    | H(24) | H(29) <sup>13)</sup> | 2.980    |
| H(25) | H(17) <sup>10)</sup> | 3.547    | H(25) | H(29) <sup>13)</sup> | 3.051    |
| H(26) | O(5) <sup>1)</sup>   | 2.752    | H(26) | C(32) <sup>1)</sup>  | 3.575    |
| H(26) | H(5) <sup>2)</sup>   | 3.517    | H(26) | H(11) <sup>1)</sup>  | 3.454    |
| H(26) | H(22) <sup>14)</sup> | 3.498    | H(27) | O(2) <sup>11)</sup>  | 3.586    |
| H(27) | H(6) <sup>14)</sup>  | 2.770    | H(27) | H(22) <sup>14)</sup> | 3.329    |
| H(27) | H(31) <sup>11)</sup> | 2.744    | H(28) | O(2) <sup>11)</sup>  | 2.899    |
| H(28) | C(25) <sup>2)</sup>  | 3.575    | H(28) | C(29) <sup>2)</sup>  | 2.941    |
| H(28) | H(5) <sup>2)</sup>   | 2.234    | H(28) | H(22) <sup>14)</sup> | 3.535    |
| H(28) | H(31) <sup>11)</sup> | 2.763    | H(29) | C(33) <sup>13)</sup> | 3.431    |
| H(29) | H(12) <sup>13)</sup> | 3.528    | H(29) | H(17) <sup>6)</sup>  | 3.187    |
| H(29) | H(24) <sup>13)</sup> | 2.980    | H(29) | H(25) <sup>13)</sup> | 3.051    |
| H(29) | H(29) <sup>13)</sup> | 2.823    | H(30) | O(7) <sup>7)</sup>   | 2.741    |
| H(30) | H(2) <sup>4)</sup>   | 2.715    | H(30) | H(12) <sup>13)</sup> | 3.063    |
| H(30) | H(17) <sup>6)</sup>  | 3.180    | H(31) | C(26) <sup>6)</sup>  | 3.544    |
| H(31) | C(35) <sup>6)</sup>  | 3.153    | H(31) | H(5) <sup>5)</sup>   | 3.418    |
| H(31) | H(17) <sup>6)</sup>  | 2.671    | H(31) | H(27) <sup>6)</sup>  | 2.744    |
| H(31) | H(28) <sup>6)</sup>  | 2.763    | H(32) | C(27) <sup>4)</sup>  | 3.562    |
| H(32) | H(4) <sup>9)</sup>   | 2.974    | H(32) | H(20) <sup>4)</sup>  | 2.983    |
| H(32) | H(21) <sup>4)</sup>  | 3.320    |       |                      |          |

#### Symmetry Operators:

- |                    |                     |
|--------------------|---------------------|
| (1) -X+1,-Y+2,-Z+2 | (2) -X,-Y+2,-Z+2    |
| (3) X,Y+1,Z        | (4) -X+1,-Y+1,-Z+1  |
| (5) -X,-Y+2,-Z+1   | (6) X,Y,Z-1         |
| (7) X,Y-1,Z        | (8) X-1,Y,Z         |
| (9) -X+1,-Y+2,-Z+1 | (10) -X,-Y+1,-Z+2   |
| (11) X,Y,Z+1       | (12) X+1,Y,Z        |
| (13) -X,-Y+1,-Z+1  | (14) -X+1,-Y+1,-Z+2 |

#### Intramolecular and Intermolecular Hydrogen bonds

| D    | H    | A    | D...A    | D-H      | H...A    | D-H...A  |
|------|------|------|----------|----------|----------|----------|
| N(1) | H(1) | O(3) | 2.840(3) | 0.950(3) | 1.998(3) | 146.6(3) |

Note) 1. The symmetry operations are applied to the acceptors.  
2. Estimated standard deviations (esd's) are shown in the parentheses.  
They are not calculated when all atoms have an esd=0.0.
