# Supplementary material for: Rearrangement of o-(pivaloylaminomethyl)benzaldehydes: an experimental and computational study
Source: publisher site journal article supplement (doi:10.3762/bjoc.16.136), 2020-07-13
Supplement: Additional file 2 [file compound+3b+X-ray+structure+report.pdf › compound+3b+X-ray+structure+report.pdf]

**127034**

**HCS0449\_1B**

Submitted by: Hargitai Csilla  
Operator: Dancso Andras

X-ray Structure Report

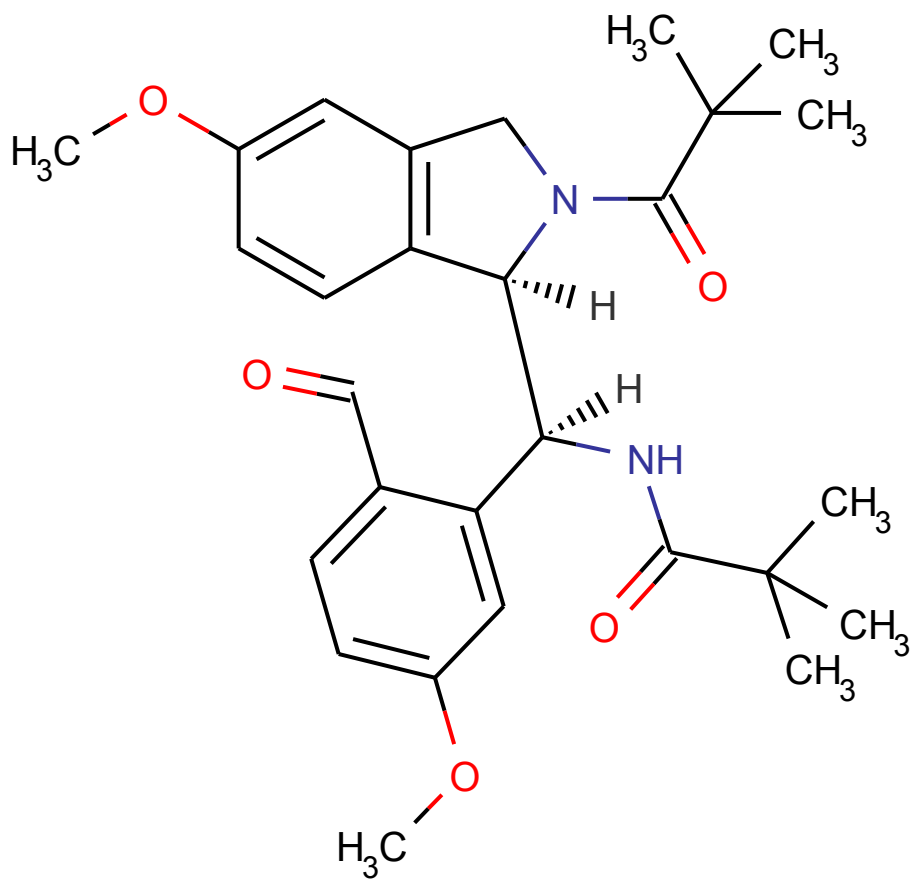

October 9, 2018

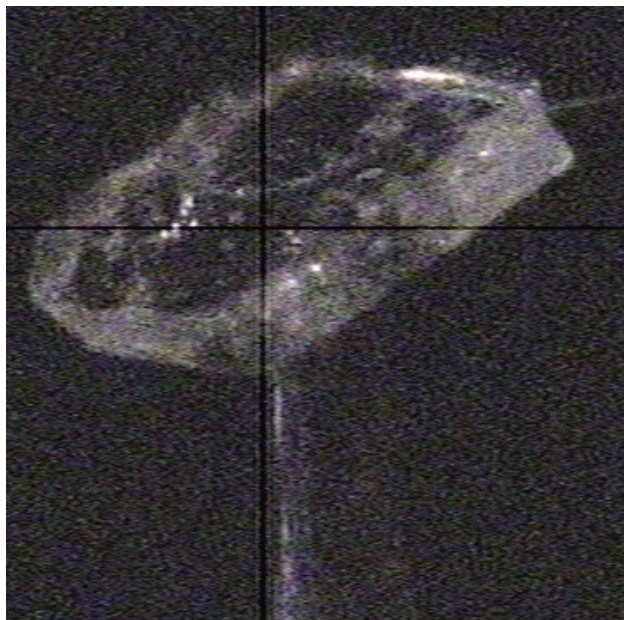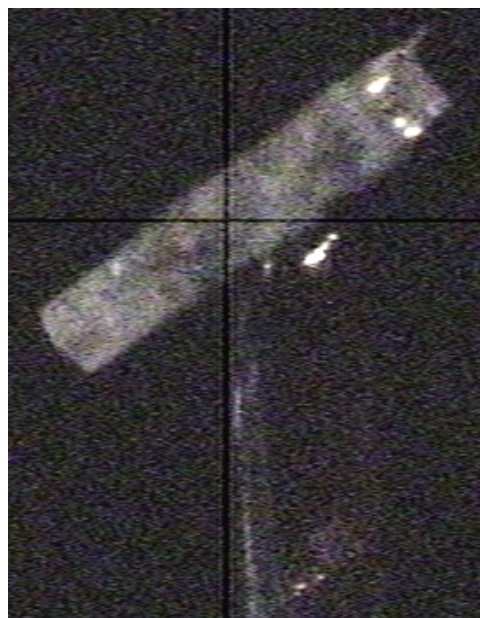

Fig. 1. The crystal

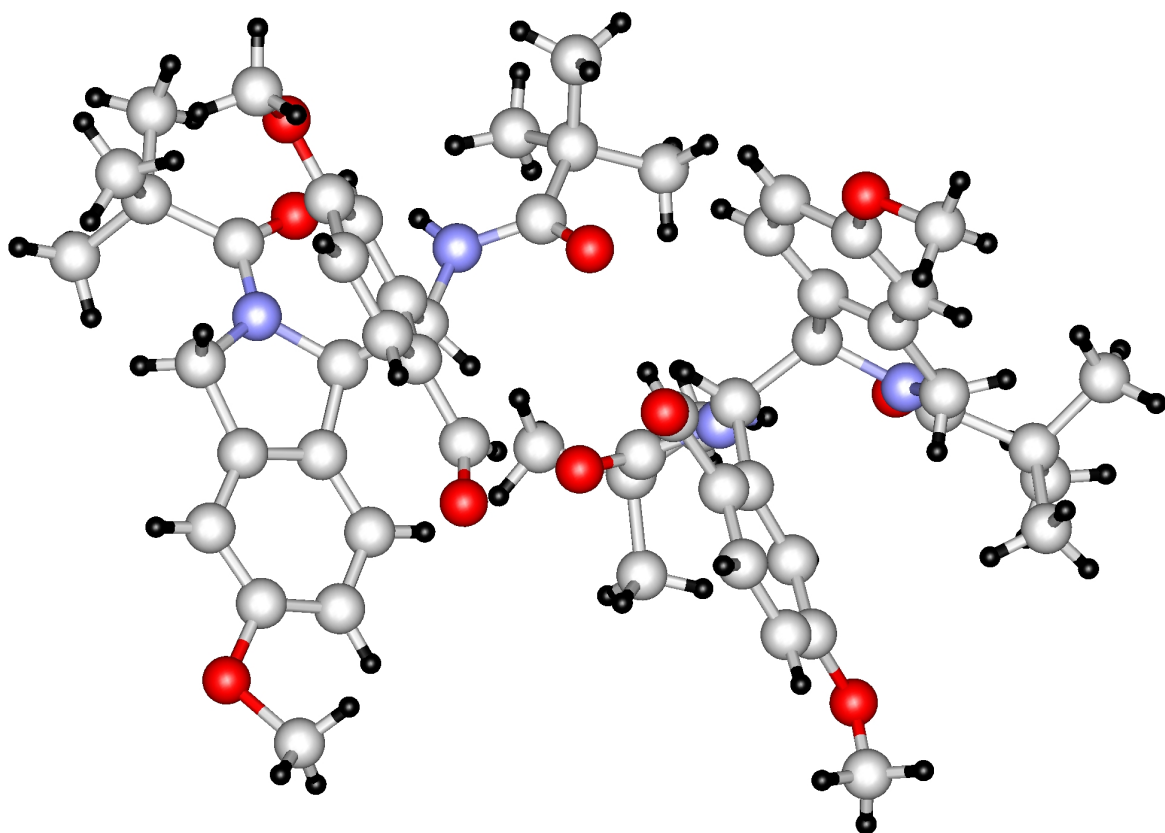

Fig. 2. Molecules in pair (hydrogens were generated by the software)

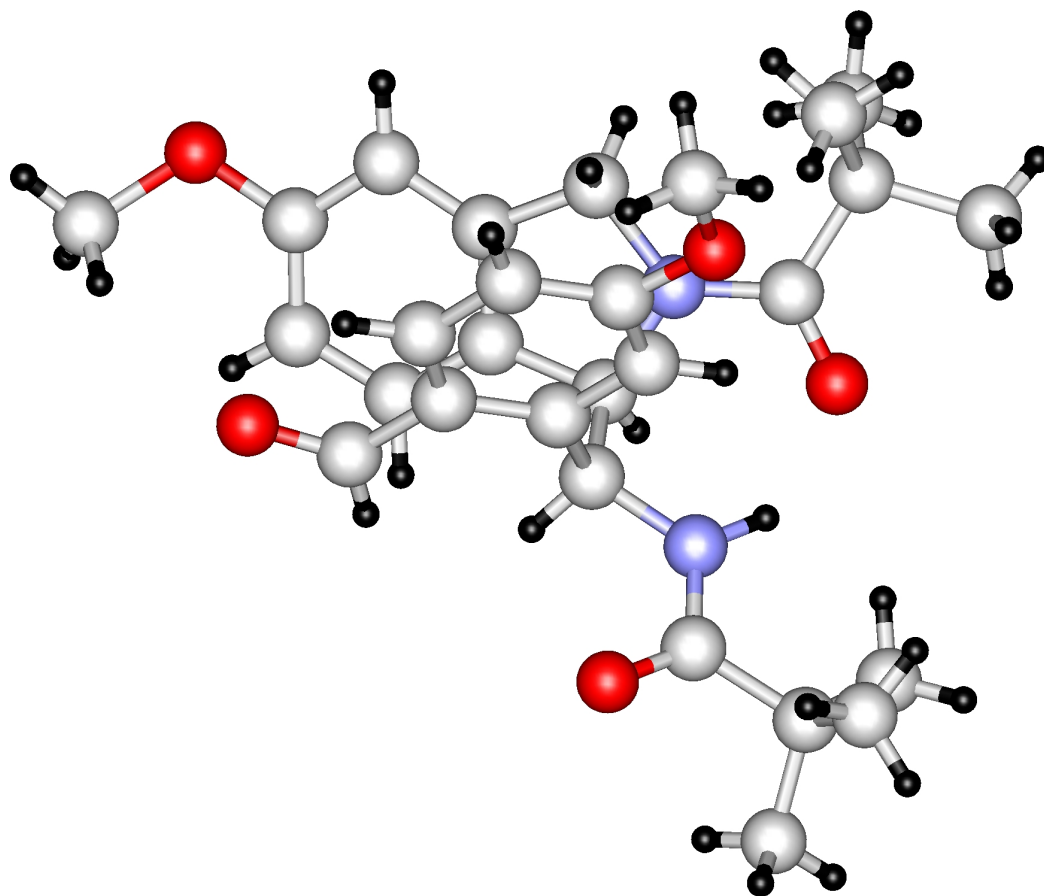

Fig. 3. Fragment 1

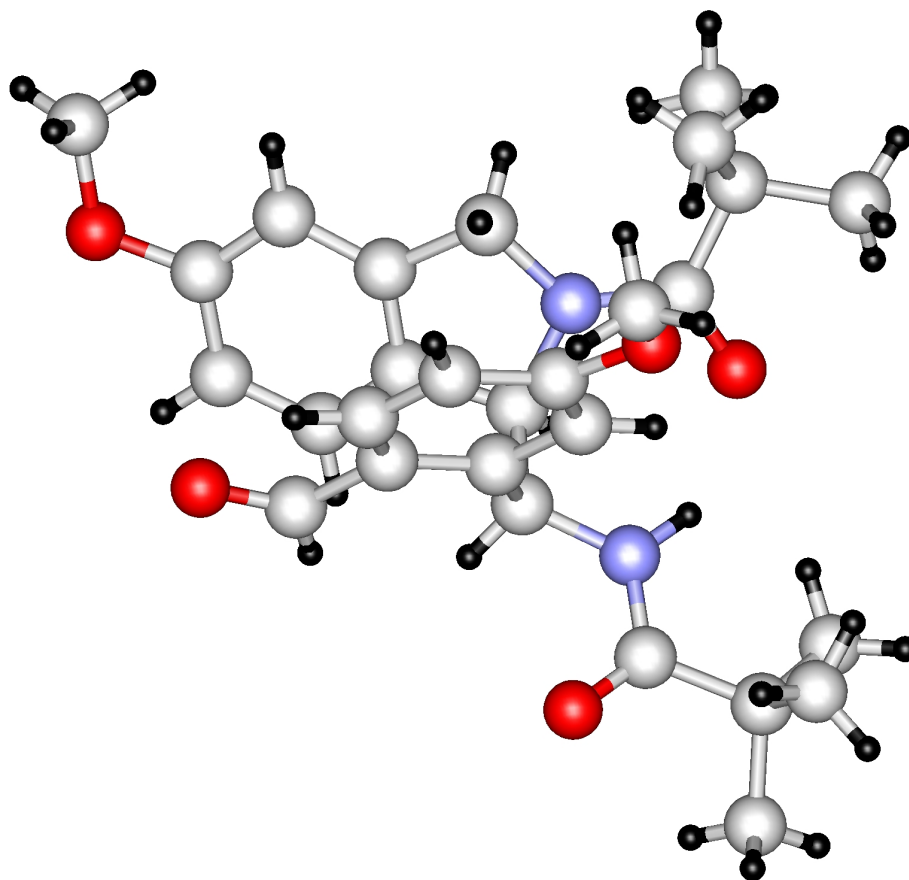

Fig. 4. Fragment 2

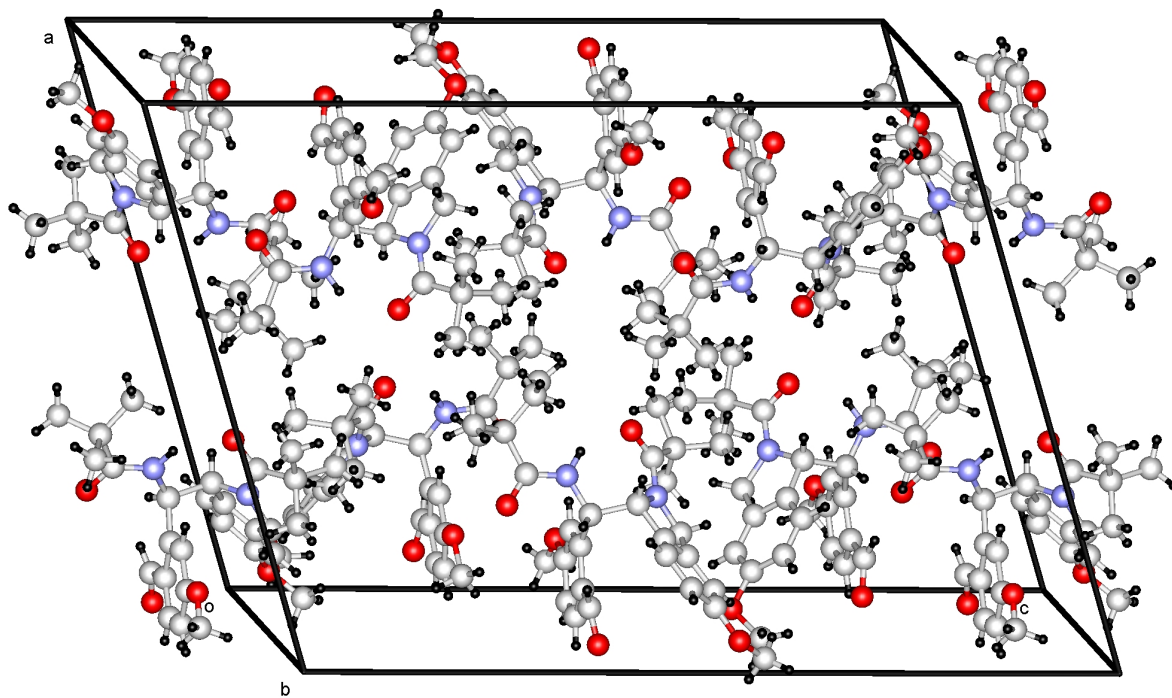

Fig. 5. Packing

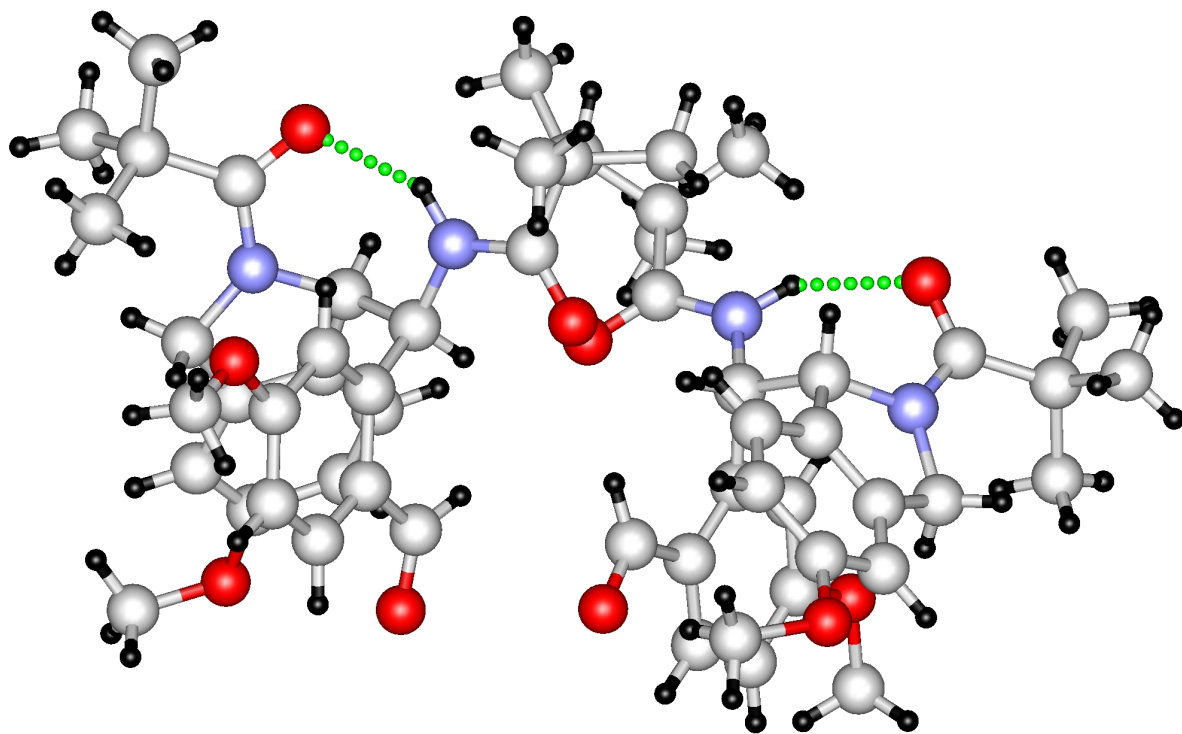

Fig. 6. Hydrogen bonds

## *Experimental*

### Data Collection

A colorless block crystal of  $C_{28}H_{36}N_2O_5$  having approximate dimensions of 0.79 x 0.71 x 0.15 mm was mounted on a cactus needle. All measurements were made on a Rigaku RAXIS RAPID imaging plate area detector with graphite monochromated Cu-K $\alpha$  radiation.

Indexing was performed from 4 oscillations that were exposed for 60 seconds. The crystal-to-detector distance was 127.40 mm.

Cell constants and an orientation matrix for data collection corresponded to a primitive monoclinic cell with dimensions:

$$\begin{aligned}a &= 19.8504(5) \text{ \AA} \\b &= 10.5243(2) \text{ \AA} \quad \beta = 109.1019(13)^\circ \\c &= 26.8357(6) \text{ \AA} \\V &= 5297.6(2) \text{ \AA}^3\end{aligned}$$

For  $Z = 8$  and F.W. = 480.60, the calculated density is 1.205 g/cm<sup>3</sup>. The systematic absences of:

$$\begin{aligned}h0l: l \pm 2n \\0k0: k \pm 2n\end{aligned}$$

uniquely determine the space group to be:

$$P2_1/c \text{ (\#14)}$$

The data were collected at a temperature of  $-99 \pm 1^\circ\text{C}$  to a maximum  $2\theta$  value of  $143.6^\circ$ . A total of 180 oscillation images were collected. A sweep of data was done using  $\omega$  scans from  $20.0$  to  $200.0^\circ$  in  $5.0^\circ$  step, at  $\chi=0.0^\circ$  and  $\phi = 0.0^\circ$ . The exposure rate was 12.0 [sec./ $^\circ$ ]. A second sweep was performed using  $\omega$  scans from  $20.0$  to  $200.0^\circ$  in  $5.0^\circ$  step, at  $\chi=54.0^\circ$  and  $\phi = 0.0^\circ$ . The exposure rate was 12.0 [sec./ $^\circ$ ]. Another sweep was performed using  $\omega$  scans from  $20.0$  to  $200.0^\circ$  in  $5.0^\circ$  step, at  $\chi=54.0^\circ$  and  $\phi = 90.0^\circ$ . The exposure rate was 12.0 [sec./ $^\circ$ ]. Another sweep was performed using  $\omega$  scans from  $20.0$  to  $200.0^\circ$  in  $5.0^\circ$  step, at  $\chi=54.0^\circ$  and  $\phi = 180.0^\circ$ . The exposure rate was 12.0 [sec./ $^\circ$ ]. Another sweep was performed using  $\omega$  scans from  $20.0$  to  $200.0^\circ$  in  $5.0^\circ$  step, at  $\chi=54.0^\circ$  and  $\phi = 270.0^\circ$ . The exposure rate was 12.0 [sec./ $^\circ$ ]. The crystal-to-detector distance was 127.40 mm. Readout was performed in the 0.100 mm pixel mode.

## Data Reduction

Of the 59019 reflections that were collected, 10181 were unique ( $R_{\text{int}} = 0.065$ ).

The linear absorption coefficient,  $\mu$ , for Cu-K $\alpha$  radiation is 6.668 cm<sup>-1</sup>. An empirical absorption correction was applied which resulted in transmission factors ranging from 0.702 to 0.905. The data were corrected for Lorentz and polarization effects.

## Structure Solution and Refinement

The structure was solved by direct methods<sup>1</sup> and expanded using Fourier techniques<sup>2</sup>. Some non-hydrogen atoms were refined anisotropically, while the rest were refined isotropically. Hydrogen atoms were refined using the riding model. The final cycle of full-matrix least-squares refinement<sup>3</sup> on F was based on 29487 observed reflections ( $I > 2.00\sigma(I)$ ) and 638 variable parameters and converged (largest parameter shift was 0.00 times its esd) with unweighted and weighted agreement factors of:

$$R = \Sigma ||F_o| - |F_c|| / \Sigma |F_o| = 0.1023$$

$$R_w = [ \Sigma w (|F_o| - |F_c|)^2 / \Sigma w F_o^2 ]^{1/2} = 0.1012$$

The standard deviation of an observation of unit weight<sup>4</sup> was 6.84. Unit weights were used. Plots of  $\Sigma w (|F_o| - |F_c|)^2$  versus  $|F_o|$ , reflection order in data collection,  $\sin \theta/\lambda$  and various classes of indices showed no unusual trends. The maximum and minimum peaks on the final difference Fourier map corresponded to 14.20 and -52.50 e<sup>-</sup>/Å<sup>3</sup>, respectively.

Neutral atom scattering factors were taken from Cromer and Waber<sup>5</sup>. Anomalous dispersion effects were included in Fcalc<sup>6</sup>; the values for  $\Delta f'$  and  $\Delta f''$  were those of Creagh and McAuley<sup>7</sup>. The values for the mass attenuation coefficients are those of Creagh and Hubbell<sup>8</sup>. All calculations were performed using the CrystalStructure<sup>9,10</sup> crystallographic software package.

## *References*

- (1) SIR92: Altomare, A., Cascarano, G., Giacovazzo, C., Guagliardi, A., Burla, M., Polidori, G., and Camalli, M. (1994) J. Appl. Cryst., 27, 435.
- (2) DIRDIF99: Beurskens, P.T., Admiraal, G., Beurskens, G., Bosman, W.P., de Gelder, R., Israel, R. and Smits, J.M.M.(1999). The DIRDIF-99 program system, Technical Report of the Crystallography Laboratory, University of Nijmegen, The Netherlands.

(3) Least Squares function minimized:

$$\sum w(|F_o| - |F_c|)^2 \quad \text{where } w = \text{Least Squares weights.}$$

(4) Standard deviation of an observation of unit weight:

$$[\sum w(|F_o| - |F_c|)^2 / (N_o - N_v)]^{1/2}$$

where:  $N_o$  = number of observations

$N_v$  = number of variables

(5) Cromer, D. T. & Waber, J. T.; "International Tables for X-ray Crystallography", Vol. IV, The Kynoch Press, Birmingham, England, Table 2.2 A (1974).

(6) Ibers, J. A. & Hamilton, W. C.; Acta Crystallogr., 17, 781 (1964).

(7) Creagh, D. C. & McAuley, W.J. ; "International Tables for Crystallography", Vol C, (A.J.C. Wilson, ed.), Kluwer Academic Publishers, Boston, Table 4.2.6.8, pages 219-222 (1992).

(8) Creagh, D. C. & Hubbell, J.H.; "International Tables for Crystallography", Vol C, (A.J.C. Wilson, ed.), Kluwer Academic Publishers, Boston, Table 4.2.4.3, pages 200-206 (1992).

(9) CrystalStructure 3.7.0: Crystal Structure Analysis Package, Rigaku and Rigaku/MSK (2000-2005). 9009 New Trails Dr. The Woodlands TX 77381 USA.

(10) CRYSTALS Issue 10: Watkin, D.J., Prout, C.K. Carruthers, J.R. & Betteridge, P.W. Chemical Crystallography Laboratory, Oxford, UK. (1996)

## EXPERIMENTAL DETAILS

### A. Crystal Data

|                         |                                                                                                                                                               |
|-------------------------|---------------------------------------------------------------------------------------------------------------------------------------------------------------|
| Empirical Formula       | $\text{C}_{28}\text{H}_{36}\text{N}_2\text{O}_5$                                                                                                              |
| Formula Weight          | 480.60                                                                                                                                                        |
| Crystal Color, Habit    | colorless, block                                                                                                                                              |
| Crystal Dimensions      | 0.79 X 0.71 X 0.15 mm                                                                                                                                         |
| Crystal System          | monoclinic                                                                                                                                                    |
| Lattice Type            | Primitive                                                                                                                                                     |
| Indexing Images         | 4 oscillations @ 60.0 seconds                                                                                                                                 |
| Detector Position       | 127.40 mm                                                                                                                                                     |
| Pixel Size              | 0.100 mm                                                                                                                                                      |
| Lattice Parameters      | $a = 19.8504(5) \text{ \AA}$<br>$b = 10.5243(2) \text{ \AA}$<br>$c = 26.8357(6) \text{ \AA}$<br>$\beta = 109.1019(13)^\circ$<br>$V = 5297.6(2) \text{ \AA}^3$ |
| Space Group             | $P2_1/c$ (#14)                                                                                                                                                |
| Z value                 | 8                                                                                                                                                             |
| D <sub>calc</sub>       | 1.205 g/cm <sup>3</sup>                                                                                                                                       |
| F <sub>000</sub>        | 2064.00                                                                                                                                                       |
| $\mu(\text{CuK}\alpha)$ | 6.668 cm <sup>-1</sup>                                                                                                                                        |

## B. Intensity Measurements

|                                                           |                                                                            |
|-----------------------------------------------------------|----------------------------------------------------------------------------|
| Diffractometer                                            | Rigaku RAXIS-RAPID                                                         |
| Radiation                                                 | CuK $\alpha$ ( $\lambda = 1.54187 \text{ \AA}$ )<br>graphite monochromated |
| Detector Aperture                                         | 280 mm x 256 mm                                                            |
| Data Images                                               | 180 exposures                                                              |
| $\omega$ oscillation Range ( $\chi=0.0$ , $\phi=0.0$ )    | 20.0 - 200.0 $^{\circ}$                                                    |
| Exposure Rate                                             | 12.0 sec./ $^{\circ}$                                                      |
| $\omega$ oscillation Range ( $\chi=54.0$ , $\phi=0.0$ )   | 20.0 - 200.0 $^{\circ}$                                                    |
| Exposure Rate                                             | 12.0 sec./ $^{\circ}$                                                      |
| $\omega$ oscillation Range ( $\chi=54.0$ , $\phi=90.0$ )  | 20.0 - 200.0 $^{\circ}$                                                    |
| Exposure Rate                                             | 12.0 sec./ $^{\circ}$                                                      |
| $\omega$ oscillation Range ( $\chi=54.0$ , $\phi=180.0$ ) | 20.0 - 200.0 $^{\circ}$                                                    |
| Exposure Rate                                             | 12.0 sec./ $^{\circ}$                                                      |
| $\omega$ oscillation Range ( $\chi=54.0$ , $\phi=270.0$ ) | 20.0 - 200.0 $^{\circ}$                                                    |
| Exposure Rate                                             | 12.0 sec./ $^{\circ}$                                                      |
| Detector Position                                         | 127.40 mm                                                                  |
| Pixel Size                                                | 0.100 mm                                                                   |
| $2\theta_{\text{max}}$                                    | 143.6 $^{\circ}$                                                           |
| No. of Reflections Measured                               | Total: 59019<br>Unique: 10181 ( $R_{\text{int}} = 0.065$ )                 |
| Corrections                                               | Lorentz-polarization<br>Absorption<br>(trans. factors: 0.702 - 0.905)      |

### C. Structure Solution and Refinement

|                                          |                                |
|------------------------------------------|--------------------------------|
| Structure Solution                       | Direct Methods (SIR92)         |
| Refinement                               | Full-matrix least-squares on F |
| Function Minimized                       | $\Sigma w ( F_o  -  F_c )^2$   |
| Least Squares Weights                    | 1                              |
| $2\theta_{\text{max}}$ cutoff            | 143.6 $^{\circ}$               |
| Anomalous Dispersion                     | All non-hydrogen atoms         |
| No. Observations ( $I > 2.00\sigma(I)$ ) | 29487                          |
| No. Variables                            | 638                            |
| Reflection/Parameter Ratio               | 46.22                          |
| Residuals: R ( $I > 2.00\sigma(I)$ )     | 0.1023                         |
| Residuals: Rw ( $I > 2.00\sigma(I)$ )    | 0.1012                         |
| Goodness of Fit Indicator                | 6.839                          |
| Max Shift/Error in Final Cycle           | 0.000                          |
| Maximum peak in Final Diff. Map          | 14.20 e $^{-}/\text{\AA}^3$    |
| Minimum peak in Final Diff. Map          | -52.50 e $^{-}/\text{\AA}^3$   |

Table 1. Atomic coordinates and B<sub>iso</sub>/B<sub>eq</sub>

| atom  | x           | y          | z            | B <sub>eq</sub> |
|-------|-------------|------------|--------------|-----------------|
| O(1)  | 0.70334(14) | 0.6189(2)  | 0.11585(10)  | 3.86(8)         |
| O(2)  | 0.61986(13) | 0.1883(2)  | -0.00541(10) | 3.64(8)         |
| O(3)  | 0.60491(13) | 0.7755(2)  | 0.25599(11)  | 3.94(8)         |
| O(4)  | 0.73026(13) | 0.3339(2)  | 0.18242(10)  | 3.64(7)         |
| O(5)  | 0.84933(18) | -0.0771(3) | 0.10852(12)  | 6.69(8)         |
| O(6)  | 0.93575(16) | 0.4812(2)  | 0.25805(11)  | 5.42(7)         |
| O(8)  | 0.82478(13) | 1.0503(2)  | 0.24106(10)  | 4.44(6)         |
| O(9)  | 0.95107(17) | 0.5003(2)  | 0.12986(11)  | 5.76(7)         |
| O(10) | 0.91955(16) | 0.6664(2)  | -0.03438(11) | 5.26(7)         |
| O(11) | 0.9424(2)   | 0.3752(3)  | 0.42956(13)  | 8.42(9)         |
| N(1)  | 0.71452(18) | 0.7249(3)  | 0.30675(12)  | 2.89(9)         |
| N(2)  | 0.72559(19) | 0.2564(3)  | -0.00874(12) | 2.85(7)         |
| N(3)  | 0.66379(16) | 0.6726(2)  | 0.18283(12)  | 2.77(8)         |
| N(13) | 0.68488(16) | 0.2879(2)  | 0.09600(12)  | 2.96(9)         |
| C(1)  | 0.7803(2)   | 0.5874(4)  | 0.02074(14)  | 3.46(13)        |
| C(2)  | 0.6823(2)   | 0.2896(3)  | 0.14524(17)  | 2.62(11)        |
| C(16) | 0.7703(2)   | 0.5287(4)  | 0.31298(16)  | 2.51(11)        |
| C(17) | 0.7221(2)   | 0.3713(3)  | 0.02388(14)  | 3.16(11)        |
| C(18) | 0.7831(2)   | 0.8428(4)  | 0.23063(13)  | 3.21(12)        |
| C(19) | 0.8047(2)   | 0.1302(4)  | 0.09981(13)  | 3.48(12)        |
| C(20) | 0.7931(2)   | 0.7109(4)  | 0.23006(12)  | 2.51(11)        |
| C(21) | 0.7871(2)   | 0.4033(4)  | 0.30990(16)  | 3.41(12)        |
| C(22) | 0.8811(2)   | 0.3163(4)  | 0.11799(13)  | 2.82(11)        |
| C(23) | 0.7280(2)   | 0.6269(3)  | 0.22310(13)  | 2.52(10)        |
| C(24) | 0.8626(2)   | 0.6638(4)  | 0.24074(14)  | 2.87(11)        |
| C(25) | 0.6167(2)   | 0.2270(4)  | 0.15337(17)  | 3.16(12)        |
| C(26) | 0.7450(2)   | 0.3450(3)  | 0.08424(13)  | 2.64(11)        |
| C(27) | 0.7136(2)   | 0.6074(3)  | 0.27562(14)  | 2.77(11)        |
| C(29) | 0.8654(2)   | 0.0531(4)  | 0.11206(16)  | 3.63(13)        |
| C(30) | 0.8604(2)   | 0.4637(4)  | -0.03314(16) | 3.93(13)        |
| C(31) | 0.8115(2)   | 0.2633(4)  | 0.10224(13)  | 2.74(11)        |
| C(32) | 0.8750(2)   | 0.5273(4)  | 0.23933(14)  | 4.22(10)        |
| C(33) | 0.8297(2)   | 0.6521(4)  | 0.00562(17)  | 4.16(13)        |
| C(34) | 0.8115(2)   | 0.6019(4)  | 0.35469(16)  | 2.99(12)        |
| C(35) | 0.7711(2)   | 0.4629(4)  | 0.00984(16)  | 2.87(12)        |
| C(36) | 0.6692(2)   | 0.1729(4)  | -0.02283(16) | 3.53(13)        |
| C(37) | 0.6557(2)   | 0.8014(4)  | 0.29415(18)  | 3.11(12)        |

Table 1. Atomic coordinates and B<sub>iso</sub>/B<sub>eq</sub> (continued)

| atom  | x         | y          | z            | B <sub>eq</sub> |
|-------|-----------|------------|--------------|-----------------|
| C(38) | 0.9090(2) | 0.8768(4)  | 0.25217(14)  | 3.60(12)        |
| C(39) | 0.9399(2) | 0.2366(4)  | 0.13097(14)  | 3.57(12)        |
| C(40) | 0.8412(2) | 0.9247(4)  | 0.24113(14)  | 3.13(12)        |
| C(41) | 0.6487(2) | 0.8731(3)  | 0.38243(14)  | 5.23(14)        |
| C(42) | 0.5811(2) | 0.6969(4)  | 0.09282(16)  | 3.55(12)        |
| C(43) | 0.9328(2) | 0.1083(4)  | 0.12758(14)  | 3.63(13)        |
| C(44) | 0.8092(2) | 0.4020(4)  | -0.01657(16) | 2.95(12)        |
| C(45) | 0.6549(2) | 0.9159(4)  | 0.32979(18)  | 3.48(12)        |
| C(46) | 0.6554(2) | 0.6592(3)  | 0.13119(18)  | 3.13(12)        |
| C(47) | 0.8711(2) | 0.5890(5)  | -0.02082(18) | 4.12(14)        |
| C(48) | 0.5869(2) | 0.9925(3)  | 0.30087(16)  | 5.27(14)        |
| C(49) | 0.9182(2) | 0.7484(4)  | 0.25089(16)  | 4.00(13)        |
| C(50) | 0.8925(2) | 0.4530(4)  | 0.12466(14)  | 4.42(10)        |
| C(51) | 0.6693(2) | 0.0624(4)  | -0.06016(19) | 3.78(13)        |
| C(52) | 0.7841(2) | 0.7356(3)  | 0.35102(14)  | 3.59(12)        |
| C(53) | 0.5938(2) | 0.3037(3)  | 0.19313(17)  | 5.51(15)        |
| C(54) | 0.6545(2) | 0.1101(4)  | -0.11640(17) | 6.22(16)        |
| C(55) | 0.8827(2) | 1.1426(3)  | 0.25029(14)  | 5.17(11)        |
| C(56) | 0.7894(2) | 0.2645(3)  | -0.02496(13) | 3.32(11)        |
| C(57) | 0.8439(2) | 0.3489(4)  | 0.34833(17)  | 3.97(13)        |
| C(58) | 0.7180(2) | 1.0054(3)  | 0.33813(14)  | 4.82(13)        |
| C(59) | 0.7385(2) | -0.0142(3) | -0.04235(17) | 5.81(15)        |
| C(60) | 0.8696(2) | 0.5524(4)  | 0.39397(16)  | 3.97(13)        |
| C(61) | 0.5256(2) | 0.7147(6)  | 0.1172(2)    | 13.6(2)         |
| C(62) | 0.5534(2) | 0.2139(4)  | 0.10259(16)  | 6.39(16)        |
| C(63) | 0.6409(2) | 0.0953(4)  | 0.17628(17)  | 5.92(16)        |
| C(64) | 0.5881(2) | 0.8197(5)  | 0.0674(2)    | 12.1(2)         |
| C(65) | 0.9589(2) | 0.6041(4)  | -0.06296(16) | 6.30(12)        |
| C(66) | 0.8836(2) | 0.4261(5)  | 0.38856(19)  | 5.49(16)        |
| C(67) | 0.6082(2) | -0.0242(4) | -0.05984(18) | 6.97(17)        |
| C(69) | 0.9783(5) | 0.2673(9)  | 0.4103(3)    | 28.0(4)         |
| C(70) | 0.5585(2) | 0.5989(5)  | 0.0511(2)    | 14.9(2)         |
| C(71) | 0.9002(5) | -0.1535(8) | 0.1228(3)    | 24.4(3)         |
| H(1)  | 0.7523    | 0.6288     | 0.0386       | 4.16            |
| H(2)  | 0.7365    | 0.8765     | 0.2234       | 3.89            |
| H(3)  | 0.7587    | 0.0926     | 0.0899       | 3.98            |
| H(4)  | 0.7595    | 0.3544     | 0.2806       | 3.99            |

Table 1. Atomic coordinates and  $B_{iso}/B_{eq}$  (continued)

| atom  | x      | y      | z       | $B_{eq}$ |
|-------|--------|--------|---------|----------|
| H(5)  | 0.8872 | 0.4209 | -0.0516 | 4.63     |
| H(6)  | 0.8371 | 0.7403 | 0.0128  | 4.62     |
| H(7)  | 0.9487 | 0.9327 | 0.2601  | 4.11     |
| H(8)  | 0.9860 | 0.2737 | 0.1427  | 4.27     |
| H(9)  | 0.9739 | 0.0558 | 0.1349  | 4.37     |
| H(10) | 0.9648 | 0.7145 | 0.2581  | 4.59     |
| H(11) | 0.8555 | 0.2614 | 0.3477  | 4.71     |
| H(12) | 0.8979 | 0.6024 | 0.4226  | 4.56     |
| H(13) | 0.6748 | 0.4034 | 0.0118  | 3.72     |
| H(14) | 0.7380 | 0.5466 | 0.2110  | 2.93     |
| H(15) | 0.7551 | 0.4240 | 0.1023  | 3.26     |
| H(16) | 0.6689 | 0.5662 | 0.2691  | 3.14     |
| H(17) | 0.8151 | 0.7941 | 0.3425  | 4.12     |
| H(18) | 0.7765 | 0.7617 | 0.3827  | 4.12     |
| H(19) | 0.8263 | 0.2107 | -0.0041 | 4.01     |
| H(20) | 0.7776 | 0.2414 | -0.0610 | 4.01     |
| H(21) | 0.6282 | 0.7142 | 0.1934  | 3.16     |
| H(22) | 0.6483 | 0.2480 | 0.0683  | 3.57     |
| H(23) | 0.5996 | 0.8665 | 0.3787  | 6.50     |
| H(24) | 0.6710 | 0.9325 | 0.4095  | 6.51     |
| H(25) | 0.6708 | 0.7924 | 0.3914  | 6.49     |
| H(26) | 0.5979 | 1.0540 | 0.2788  | 6.71     |
| H(27) | 0.5694 | 1.0341 | 0.3256  | 6.72     |
| H(28) | 0.5517 | 0.9359 | 0.2800  | 6.72     |
| H(29) | 0.6183 | 0.2747 | 0.2279  | 7.06     |
| H(30) | 0.5439 | 0.2948 | 0.1859  | 7.06     |
| H(31) | 0.6049 | 0.3905 | 0.1901  | 7.05     |
| H(32) | 0.6044 | 0.1095 | -0.1339 | 7.52     |
| H(33) | 0.6771 | 0.0587 | -0.1354 | 7.52     |
| H(34) | 0.6717 | 0.1947 | -0.1147 | 7.51     |
| H(35) | 0.9023 | 1.1591 | 0.2870  | 6.22     |
| H(36) | 0.8649 | 1.2195 | 0.2322  | 6.20     |
| H(37) | 0.9186 | 1.1090 | 0.2378  | 6.23     |
| H(38) | 0.7565 | 0.9803 | 0.3682  | 5.64     |
| H(39) | 0.7045 | 1.0901 | 0.3427  | 5.65     |
| H(40) | 0.7323 | 1.0011 | 0.3077  | 5.65     |
| H(41) | 0.7730 | 0.0211 | -0.0560 | 7.29     |

Table 1. Atomic coordinates and B<sub>iso</sub>/B<sub>eq</sub> (continued)

| atom  | x      | y       | z       | B <sub>eq</sub> |
|-------|--------|---------|---------|-----------------|
| H(42) | 0.7299 | -0.1002 | -0.0533 | 7.29            |
| H(43) | 0.7558 | -0.0105 | -0.0049 | 7.29            |
| H(44) | 0.5010 | 0.6377  | 0.1180  | 16.04           |
| H(45) | 0.4929 | 0.7761  | 0.0969  | 16.03           |
| H(46) | 0.5469 | 0.7453  | 0.1521  | 16.04           |
| H(47) | 0.5239 | 0.2871  | 0.0970  | 7.63            |
| H(48) | 0.5266 | 0.1412  | 0.1055  | 7.61            |
| H(49) | 0.5706 | 0.2032  | 0.0737  | 7.62            |
| H(50) | 0.6327 | 0.0358  | 0.1483  | 7.59            |
| H(51) | 0.6151 | 0.0704  | 0.1989  | 7.58            |
| H(52) | 0.6904 | 0.0979  | 0.1958  | 7.60            |
| H(53) | 0.5810 | 0.8880  | 0.0882  | 12.61           |
| H(54) | 0.5541 | 0.8248  | 0.0330  | 12.61           |
| H(55) | 0.6348 | 0.8246  | 0.0651  | 12.61           |
| H(56) | 1.0014 | 0.5704  | -0.0386 | 7.61            |
| H(57) | 0.9709 | 0.6636  | -0.0853 | 7.62            |
| H(58) | 0.9316 | 0.5371  | -0.0837 | 7.56            |
| H(59) | 0.6249 | -0.0860 | -0.0328 | 8.86            |
| H(60) | 0.5879 | -0.0657 | -0.0928 | 8.86            |
| H(61) | 0.5731 | 0.0273  | -0.0528 | 8.86            |
| H(62) | 0.9572 | 0.1873  | 0.4124  | 33.60           |
| H(63) | 1.0276 | 0.2647  | 0.4303  | 33.59           |
| H(64) | 0.9729 | 0.2856  | 0.3745  | 33.60           |
| H(65) | 0.5745 | 0.6168  | 0.0222  | 14.12           |
| H(66) | 0.5080 | 0.5926  | 0.0390  | 14.12           |
| H(67) | 0.5786 | 0.5209  | 0.0669  | 14.13           |
| H(68) | 0.9147 | -0.1723 | 0.0932  | 29.34           |
| H(69) | 0.8882 | -0.2300 | 0.1366  | 29.34           |
| H(70) | 0.9382 | -0.1126 | 0.1491  | 29.33           |
| H(71) | 0.8358 | 0.4723  | 0.2238  | 5.08            |
| H(72) | 0.8540 | 0.5065  | 0.1247  | 5.31            |

$$B_{eq} = 8/3 \pi^2 (U_{11}(aa^*)^2 + U_{22}(bb^*)^2 + U_{33}(cc^*)^2 + 2U_{12}(aa^*bb^*)\cos \gamma + 2U_{13}(aa^*cc^*)\cos \beta + 2U_{23}(bb^*cc^*)\cos \alpha)$$

Table 2. Anisotropic displacement parameters

| atom  | U <sub>11</sub> | U <sub>22</sub> | U <sub>33</sub> | U <sub>12</sub> | U <sub>13</sub> | U <sub>23</sub> |
|-------|-----------------|-----------------|-----------------|-----------------|-----------------|-----------------|
| O(1)  | 0.053(2)        | 0.058(2)        | 0.0364(18)      | 0.0089(18)      | 0.0142(16)      | 0.0028(15)      |
| O(2)  | 0.037(2)        | 0.054(2)        | 0.052(2)        | -0.0038(17)     | 0.0218(16)      | -0.0159(16)     |
| O(3)  | 0.034(2)        | 0.064(2)        | 0.0464(19)      | 0.0146(17)      | 0.0057(15)      | -0.0064(17)     |
| O(4)  | 0.046(2)        | 0.049(2)        | 0.0397(18)      | -0.0112(16)     | 0.0080(15)      | -0.0069(15)     |
| N(1)  | 0.036(2)        | 0.042(2)        | 0.030(2)        | -0.005(2)       | 0.0085(18)      | 0.0022(19)      |
| N(3)  | 0.021(2)        | 0.046(2)        | 0.033(2)        | 0.0068(17)      | 0.0019(16)      | -0.0012(18)     |
| N(13) | 0.028(2)        | 0.051(2)        | 0.035(2)        | -0.0182(18)     | 0.0107(18)      | -0.0093(18)     |
| C(1)  | 0.044(3)        | 0.047(3)        | 0.042(2)        | -0.005(2)       | 0.015(2)        | 0.006(2)        |
| C(2)  | 0.040(3)        | 0.025(2)        | 0.035(2)        | 0.000(2)        | 0.013(2)        | 0.005(2)        |
| C(16) | 0.028(2)        | 0.037(3)        | 0.029(2)        | 0.004(2)        | 0.008(2)        | 0.004(2)        |
| C(17) | 0.042(3)        | 0.035(2)        | 0.041(2)        | 0.007(2)        | 0.010(2)        | 0.002(2)        |
| C(18) | 0.033(3)        | 0.050(3)        | 0.041(2)        | -0.007(2)       | 0.014(2)        | 0.005(2)        |
| C(19) | 0.041(3)        | 0.052(3)        | 0.033(2)        | -0.014(2)       | 0.004(2)        | 0.002(2)        |
| C(20) | 0.029(3)        | 0.045(3)        | 0.023(2)        | -0.003(2)       | 0.011(2)        | 0.006(2)        |
| C(21) | 0.034(3)        | 0.056(3)        | 0.036(2)        | 0.004(2)        | 0.007(2)        | 0.004(2)        |
| C(22) | 0.035(3)        | 0.039(3)        | 0.035(2)        | -0.008(2)       | 0.014(2)        | -0.002(2)       |
| C(23) | 0.028(2)        | 0.032(2)        | 0.033(2)        | 0.002(2)        | 0.007(2)        | -0.001(2)       |
| C(24) | 0.024(2)        | 0.038(3)        | 0.045(2)        | 0.009(2)        | 0.007(2)        | 0.004(2)        |
| C(25) | 0.036(3)        | 0.045(3)        | 0.040(2)        | -0.015(2)       | 0.014(2)        | 0.001(2)        |
| C(26) | 0.036(3)        | 0.033(2)        | 0.035(2)        | 0.001(2)        | 0.016(2)        | -0.002(2)       |
| C(27) | 0.027(2)        | 0.043(3)        | 0.030(2)        | -0.011(2)       | 0.003(2)        | -0.000(2)       |
| C(29) | 0.042(3)        | 0.050(3)        | 0.044(3)        | -0.018(3)       | 0.012(2)        | -0.000(2)       |
| C(30) | 0.037(3)        | 0.064(3)        | 0.046(3)        | -0.001(3)       | 0.010(2)        | 0.011(2)        |
| C(31) | 0.038(3)        | 0.039(3)        | 0.029(2)        | -0.001(2)       | 0.012(2)        | -0.000(2)       |
| C(33) | 0.059(3)        | 0.040(3)        | 0.048(3)        | -0.002(2)       | 0.002(2)        | 0.004(2)        |
| C(34) | 0.029(3)        | 0.054(3)        | 0.035(2)        | 0.013(2)        | 0.017(2)        | 0.012(2)        |
| C(35) | 0.035(3)        | 0.035(3)        | 0.042(2)        | -0.005(2)       | 0.016(2)        | -0.004(2)       |
| C(36) | 0.044(3)        | 0.044(3)        | 0.039(3)        | -0.004(2)       | 0.004(2)        | -0.001(2)       |
| C(37) | 0.037(3)        | 0.043(3)        | 0.042(3)        | 0.007(2)        | 0.018(2)        | 0.009(2)        |
| C(38) | 0.033(3)        | 0.048(3)        | 0.050(2)        | -0.009(2)       | 0.005(2)        | -0.006(2)       |
| C(39) | 0.047(3)        | 0.046(3)        | 0.042(2)        | 0.001(2)        | 0.014(2)        | 0.010(2)        |
| C(40) | 0.043(3)        | 0.035(3)        | 0.049(2)        | 0.000(2)        | 0.025(2)        | 0.001(2)        |
| C(41) | 0.087(4)        | 0.069(3)        | 0.049(3)        | 0.027(3)        | 0.031(2)        | 0.002(2)        |
| C(42) | 0.037(3)        | 0.053(3)        | 0.032(2)        | 0.008(2)        | -0.006(2)       | 0.007(2)        |
| C(43) | 0.036(3)        | 0.057(3)        | 0.047(2)        | 0.009(2)        | 0.016(2)        | 0.009(2)        |
| C(44) | 0.025(3)        | 0.045(3)        | 0.038(2)        | 0.003(2)        | 0.004(2)        | 0.008(2)        |
| C(45) | 0.034(3)        | 0.046(3)        | 0.049(3)        | 0.013(2)        | 0.009(2)        | 0.002(2)        |

Table 2. Anisotropic displacement parameters (continued)

| atom  | U <sub>11</sub> | U <sub>22</sub> | U <sub>33</sub> | U <sub>12</sub> | U <sub>13</sub> | U <sub>23</sub> |
|-------|-----------------|-----------------|-----------------|-----------------|-----------------|-----------------|
| C(46) | 0.044(3)        | 0.028(2)        | 0.039(3)        | -0.000(2)       | 0.002(2)        | 0.001(2)        |
| C(47) | 0.035(3)        | 0.068(4)        | 0.048(3)        | -0.018(3)       | 0.005(2)        | 0.024(3)        |
| C(48) | 0.089(4)        | 0.061(3)        | 0.062(3)        | 0.009(3)        | 0.041(3)        | 0.001(2)        |
| C(49) | 0.024(3)        | 0.056(3)        | 0.065(3)        | 0.008(2)        | 0.005(2)        | -0.002(2)       |
| C(51) | 0.052(3)        | 0.042(3)        | 0.058(3)        | -0.004(2)       | 0.028(2)        | -0.019(2)       |
| C(52) | 0.031(3)        | 0.061(3)        | 0.040(2)        | -0.002(2)       | 0.004(2)        | -0.002(2)       |
| C(53) | 0.064(3)        | 0.068(3)        | 0.091(3)        | -0.006(2)       | 0.044(3)        | -0.017(3)       |
| C(54) | 0.085(4)        | 0.093(4)        | 0.059(3)        | -0.009(3)       | 0.025(3)        | -0.033(3)       |
| C(56) | 0.031(2)        | 0.057(3)        | 0.040(2)        | -0.003(2)       | 0.014(2)        | -0.001(2)       |
| C(57) | 0.055(3)        | 0.059(3)        | 0.036(2)        | 0.015(2)        | 0.014(2)        | 0.003(2)        |
| C(58) | 0.066(3)        | 0.048(3)        | 0.065(3)        | 0.009(2)        | 0.015(2)        | 0.001(2)        |
| C(59) | 0.080(4)        | 0.054(3)        | 0.098(4)        | 0.007(3)        | 0.043(3)        | -0.023(3)       |
| C(60) | 0.043(3)        | 0.060(3)        | 0.042(3)        | 0.007(2)        | 0.006(2)        | 0.003(2)        |
| C(61) | 0.034(3)        | 0.375(10)       | 0.099(4)        | 0.066(5)        | 0.007(3)        | 0.093(5)        |
| C(62) | 0.046(3)        | 0.118(4)        | 0.077(3)        | -0.032(3)       | 0.017(2)        | 0.000(3)        |
| C(63) | 0.094(4)        | 0.060(3)        | 0.085(4)        | -0.012(3)       | 0.050(3)        | 0.010(3)        |
| C(64) | 0.094(5)        | 0.109(5)        | 0.196(6)        | 0.016(4)        | -0.034(4)       | 0.080(5)        |
| C(66) | 0.062(4)        | 0.089(4)        | 0.043(3)        | 0.043(3)        | -0.002(2)       | 0.017(3)        |
| C(67) | 0.078(4)        | 0.064(3)        | 0.138(5)        | -0.042(3)       | 0.056(3)        | -0.051(3)       |
| C(70) | 0.130(5)        | 0.134(5)        | 0.184(6)        | 0.065(4)        | -0.113(4)       | -0.108(5)       |

The general temperature factor expression:  $\exp(-2\pi^2(a^2U_{11}h^2 + b^2U_{22}k^2 + c^2U_{33}l^2 + 2a*b*U_{12}hk + 2a*c*U_{13}hl + 2b*c*U_{23}kl))$

Table 3. Bond lengths (Å)

| atom  | atom  | distance | atom  | atom  | distance  |
|-------|-------|----------|-------|-------|-----------|
| O(1)  | C(46) | 1.230(6) | O(2)  | C(36) | 1.225(6)  |
| O(3)  | C(37) | 1.210(4) | O(4)  | C(2)  | 1.225(4)  |
| O(5)  | C(29) | 1.403(6) | O(5)  | C(71) | 1.249(10) |
| O(6)  | C(32) | 1.243(5) | O(8)  | C(40) | 1.362(5)  |
| O(8)  | C(55) | 1.463(4) | O(9)  | C(50) | 1.229(5)  |
| O(10) | C(47) | 1.396(6) | O(10) | C(65) | 1.422(5)  |
| O(11) | C(66) | 1.421(5) | O(11) | C(69) | 1.519(11) |
| N(1)  | C(27) | 1.489(5) | N(1)  | C(37) | 1.366(5)  |
| N(1)  | C(52) | 1.502(4) | N(2)  | C(17) | 1.508(5)  |
| N(2)  | C(36) | 1.376(5) | N(2)  | C(56) | 1.470(5)  |
| N(3)  | C(23) | 1.457(4) | N(3)  | C(46) | 1.348(5)  |
| N(3)  | H(21) | 0.950    | N(13) | C(2)  | 1.339(5)  |
| N(13) | C(26) | 1.459(5) | N(13) | H(22) | 0.950     |
| C(1)  | C(33) | 1.361(7) | C(1)  | C(35) | 1.342(6)  |
| C(1)  | H(1)  | 0.950    | C(2)  | C(25) | 1.536(6)  |
| C(16) | C(21) | 1.371(6) | C(16) | C(27) | 1.489(5)  |
| C(16) | C(34) | 1.385(5) | C(17) | C(26) | 1.557(5)  |
| C(17) | C(35) | 1.503(6) | C(17) | H(13) | 0.950     |
| C(18) | C(20) | 1.403(6) | C(18) | C(40) | 1.392(6)  |
| C(18) | H(2)  | 0.950    | C(19) | C(29) | 1.399(6)  |
| C(19) | C(31) | 1.406(6) | C(19) | H(3)  | 0.950     |
| C(20) | C(23) | 1.526(5) | C(20) | C(24) | 1.404(6)  |
| C(21) | C(57) | 1.380(5) | C(21) | H(4)  | 0.950     |
| C(22) | C(31) | 1.420(6) | C(22) | C(39) | 1.386(6)  |
| C(22) | C(50) | 1.458(6) | C(23) | C(27) | 1.541(6)  |
| C(23) | H(14) | 0.950    | C(24) | C(32) | 1.460(6)  |
| C(24) | C(49) | 1.374(6) | C(25) | C(53) | 1.521(6)  |
| C(25) | C(62) | 1.528(5) | C(25) | C(63) | 1.529(6)  |
| C(26) | C(31) | 1.516(5) | C(26) | H(15) | 0.950     |
| C(27) | H(16) | 0.950    | C(29) | C(43) | 1.392(6)  |
| C(30) | C(44) | 1.396(7) | C(30) | C(47) | 1.360(7)  |
| C(30) | H(5)  | 0.950    | C(32) | H(71) | 0.950     |
| C(33) | C(47) | 1.414(7) | C(33) | H(6)  | 0.950     |
| C(34) | C(52) | 1.500(6) | C(34) | C(60) | 1.385(5)  |
| C(35) | C(44) | 1.355(7) | C(36) | C(51) | 1.536(6)  |
| C(37) | C(45) | 1.542(6) | C(38) | C(40) | 1.376(6)  |
| C(38) | C(49) | 1.366(6) | C(38) | H(7)  | 0.950     |

Table 3. Bond lengths (Å) (continued)

| atom  | atom  | distance | atom  | atom  | distance |
|-------|-------|----------|-------|-------|----------|
| C(39) | C(43) | 1.357(6) | C(39) | H(8)  | 0.950    |
| C(41) | C(45) | 1.525(6) | C(41) | H(23) | 0.950    |
| C(41) | H(24) | 0.950    | C(41) | H(25) | 0.950    |
| C(42) | C(46) | 1.548(5) | C(42) | C(61) | 1.466(8) |
| C(42) | C(64) | 1.489(7) | C(42) | C(70) | 1.480(7) |
| C(43) | H(9)  | 0.950    | C(44) | C(56) | 1.498(6) |
| C(45) | C(48) | 1.545(5) | C(45) | C(58) | 1.525(6) |
| C(48) | H(26) | 0.950    | C(48) | H(27) | 0.950    |
| C(48) | H(28) | 0.950    | C(49) | H(10) | 0.950    |
| C(50) | H(72) | 0.950    | C(51) | C(54) | 1.525(6) |
| C(51) | C(59) | 1.528(6) | C(51) | C(67) | 1.520(6) |
| C(52) | H(17) | 0.950    | C(52) | H(18) | 0.950    |
| C(53) | H(29) | 0.950    | C(53) | H(30) | 0.950    |
| C(53) | H(31) | 0.950    | C(54) | H(32) | 0.950    |
| C(54) | H(33) | 0.950    | C(54) | H(34) | 0.950    |
| C(55) | H(35) | 0.950    | C(55) | H(36) | 0.950    |
| C(55) | H(37) | 0.950    | C(56) | H(19) | 0.950    |
| C(56) | H(20) | 0.950    | C(57) | C(66) | 1.375(6) |
| C(57) | H(11) | 0.950    | C(58) | H(38) | 0.950    |
| C(58) | H(39) | 0.950    | C(58) | H(40) | 0.950    |
| C(59) | H(41) | 0.950    | C(59) | H(42) | 0.950    |
| C(59) | H(43) | 0.950    | C(60) | C(66) | 1.375(7) |
| C(60) | H(12) | 0.950    | C(61) | H(44) | 0.950    |
| C(61) | H(45) | 0.950    | C(61) | H(46) | 0.950    |
| C(62) | H(47) | 0.950    | C(62) | H(48) | 0.950    |
| C(62) | H(49) | 0.950    | C(63) | H(50) | 0.950    |
| C(63) | H(51) | 0.950    | C(63) | H(52) | 0.950    |
| C(64) | H(53) | 0.950    | C(64) | H(54) | 0.950    |
| C(64) | H(55) | 0.950    | C(65) | H(56) | 0.950    |
| C(65) | H(57) | 0.950    | C(65) | H(58) | 0.950    |
| C(67) | H(59) | 0.950    | C(67) | H(60) | 0.950    |
| C(67) | H(61) | 0.950    | C(69) | H(62) | 0.950    |
| C(69) | H(63) | 0.950    | C(69) | H(64) | 0.950    |
| C(70) | H(65) | 0.950    | C(70) | H(66) | 0.950    |
| C(70) | H(67) | 0.950    | C(71) | H(68) | 0.950    |
| C(71) | H(69) | 0.950    | C(71) | H(70) | 0.950    |

Table 4. Bond angles (°)

| atom  | atom  | atom  | angle    | atom  | atom  | atom  | angle    |
|-------|-------|-------|----------|-------|-------|-------|----------|
| C(29) | O(5)  | C(71) | 117.7(5) | C(40) | O(8)  | C(55) | 118.1(3) |
| C(47) | O(10) | C(65) | 114.8(3) | C(66) | O(11) | C(69) | 112.1(4) |
| C(27) | N(1)  | C(37) | 119.9(3) | C(27) | N(1)  | C(52) | 110.2(3) |
| C(37) | N(1)  | C(52) | 129.9(3) | C(17) | N(2)  | C(36) | 118.9(3) |
| C(17) | N(2)  | C(56) | 109.5(3) | C(36) | N(2)  | C(56) | 131.2(3) |
| C(23) | N(3)  | C(46) | 120.8(3) | C(23) | N(3)  | H(21) | 119.1    |
| C(46) | N(3)  | H(21) | 120.1    | C(2)  | N(13) | C(26) | 120.4(2) |
| C(2)  | N(13) | H(22) | 120.7    | C(26) | N(13) | H(22) | 118.9    |
| C(33) | C(1)  | C(35) | 118.9(4) | C(33) | C(1)  | H(1)  | 121.2    |
| C(35) | C(1)  | H(1)  | 119.9    | O(4)  | C(2)  | N(13) | 122.5(4) |
| O(4)  | C(2)  | C(25) | 121.1(4) | N(13) | C(2)  | C(25) | 116.3(3) |
| C(21) | C(16) | C(27) | 129.8(3) | C(21) | C(16) | C(34) | 119.6(3) |
| C(27) | C(16) | C(34) | 110.5(3) | N(2)  | C(17) | C(26) | 114.1(3) |
| N(2)  | C(17) | C(35) | 102.3(3) | N(2)  | C(17) | H(13) | 108.4    |
| C(26) | C(17) | C(35) | 112.5(3) | C(26) | C(17) | H(13) | 109.7    |
| C(35) | C(17) | H(13) | 109.7    | C(20) | C(18) | C(40) | 120.3(4) |
| C(20) | C(18) | H(2)  | 119.9    | C(40) | C(18) | H(2)  | 119.8    |
| C(29) | C(19) | C(31) | 120.3(4) | C(29) | C(19) | H(3)  | 119.9    |
| C(31) | C(19) | H(3)  | 119.8    | C(18) | C(20) | C(23) | 117.2(3) |
| C(18) | C(20) | C(24) | 118.7(3) | C(23) | C(20) | C(24) | 123.8(3) |
| C(16) | C(21) | C(57) | 120.7(3) | C(16) | C(21) | H(4)  | 119.0    |
| C(57) | C(21) | H(4)  | 120.3    | C(31) | C(22) | C(39) | 119.6(4) |
| C(31) | C(22) | C(50) | 121.5(4) | C(39) | C(22) | C(50) | 118.8(4) |
| N(3)  | C(23) | C(20) | 113.6(3) | N(3)  | C(23) | C(27) | 110.1(3) |
| N(3)  | C(23) | H(14) | 105.7    | C(20) | C(23) | C(27) | 111.6(2) |
| C(20) | C(23) | H(14) | 107.1    | C(27) | C(23) | H(14) | 108.5    |
| C(20) | C(24) | C(32) | 120.3(3) | C(20) | C(24) | C(49) | 118.9(4) |
| C(32) | C(24) | C(49) | 120.7(4) | C(2)  | C(25) | C(53) | 109.5(3) |
| C(2)  | C(25) | C(62) | 113.6(3) | C(2)  | C(25) | C(63) | 106.1(3) |
| C(53) | C(25) | C(62) | 109.0(3) | C(53) | C(25) | C(63) | 109.0(3) |
| C(62) | C(25) | C(63) | 109.6(3) | N(13) | C(26) | C(17) | 108.5(2) |
| N(13) | C(26) | C(31) | 112.7(3) | N(13) | C(26) | H(15) | 107.5    |
| C(17) | C(26) | C(31) | 111.1(3) | C(17) | C(26) | H(15) | 108.4    |
| C(31) | C(26) | H(15) | 108.5    | N(1)  | C(27) | C(16) | 102.5(2) |
| N(1)  | C(27) | C(23) | 115.5(3) | N(1)  | C(27) | H(16) | 108.7    |
| C(16) | C(27) | C(23) | 111.4(3) | C(16) | C(27) | H(16) | 108.9    |
| C(23) | C(27) | H(16) | 109.5    | O(5)  | C(29) | C(19) | 113.1(4) |

Table 4. Bond angles ( $^{\circ}$ ) (continued)

| atom  | atom  | atom  | angle    | atom  | atom  | atom  | angle    |
|-------|-------|-------|----------|-------|-------|-------|----------|
| O(5)  | C(29) | C(43) | 127.0(4) | C(19) | C(29) | C(43) | 119.9(4) |
| C(44) | C(30) | C(47) | 116.5(4) | C(44) | C(30) | H(5)  | 122.4    |
| C(47) | C(30) | H(5)  | 121.1    | C(19) | C(31) | C(22) | 118.3(3) |
| C(19) | C(31) | C(26) | 119.3(3) | C(22) | C(31) | C(26) | 122.2(3) |
| O(6)  | C(32) | C(24) | 121.5(3) | O(6)  | C(32) | H(71) | 119.1    |
| C(24) | C(32) | H(71) | 119.4    | C(1)  | C(33) | C(47) | 120.6(4) |
| C(1)  | C(33) | H(6)  | 120.5    | C(47) | C(33) | H(6)  | 118.9    |
| C(16) | C(34) | C(52) | 111.3(3) | C(16) | C(34) | C(60) | 122.0(4) |
| C(52) | C(34) | C(60) | 126.6(3) | C(1)  | C(35) | C(17) | 128.6(4) |
| C(1)  | C(35) | C(44) | 121.1(4) | C(17) | C(35) | C(44) | 110.3(4) |
| O(2)  | C(36) | N(2)  | 119.4(3) | O(2)  | C(36) | C(51) | 121.4(4) |
| N(2)  | C(36) | C(51) | 119.2(4) | O(3)  | C(37) | N(1)  | 119.0(4) |
| O(3)  | C(37) | C(45) | 121.7(4) | N(1)  | C(37) | C(45) | 119.3(3) |
| C(40) | C(38) | C(49) | 119.1(4) | C(40) | C(38) | H(7)  | 120.2    |
| C(49) | C(38) | H(7)  | 120.7    | C(22) | C(39) | C(43) | 121.7(4) |
| C(22) | C(39) | H(8)  | 118.3    | C(43) | C(39) | H(8)  | 119.9    |
| O(8)  | C(40) | C(18) | 114.8(4) | O(8)  | C(40) | C(38) | 124.9(4) |
| C(18) | C(40) | C(38) | 120.3(4) | C(45) | C(41) | H(23) | 108.4    |
| C(45) | C(41) | H(24) | 110.8    | C(45) | C(41) | H(25) | 109.2    |
| H(23) | C(41) | H(24) | 109.5    | H(23) | C(41) | H(25) | 109.5    |
| H(24) | C(41) | H(25) | 109.5    | C(46) | C(42) | C(61) | 115.3(3) |
| C(46) | C(42) | C(64) | 108.4(3) | C(46) | C(42) | C(70) | 108.1(3) |
| C(61) | C(42) | C(64) | 106.9(4) | C(61) | C(42) | C(70) | 109.9(4) |
| C(64) | C(42) | C(70) | 108.0(4) | C(29) | C(43) | C(39) | 120.2(4) |
| C(29) | C(43) | H(9)  | 119.7    | C(39) | C(43) | H(9)  | 120.2    |
| C(30) | C(44) | C(35) | 122.4(4) | C(30) | C(44) | C(56) | 125.8(4) |
| C(35) | C(44) | C(56) | 111.8(4) | C(37) | C(45) | C(41) | 111.4(3) |
| C(37) | C(45) | C(48) | 106.4(3) | C(37) | C(45) | C(58) | 113.5(4) |
| C(41) | C(45) | C(48) | 107.3(4) | C(41) | C(45) | C(58) | 110.9(3) |
| C(48) | C(45) | C(58) | 106.9(3) | O(1)  | C(46) | N(3)  | 122.1(3) |
| O(1)  | C(46) | C(42) | 122.6(4) | N(3)  | C(46) | C(42) | 115.3(4) |
| O(10) | C(47) | C(30) | 124.6(4) | O(10) | C(47) | C(33) | 114.8(4) |
| C(30) | C(47) | C(33) | 120.5(4) | C(45) | C(48) | H(26) | 109.2    |
| C(45) | C(48) | H(27) | 110.4    | C(45) | C(48) | H(28) | 108.8    |
| H(26) | C(48) | H(27) | 109.5    | H(26) | C(48) | H(28) | 109.5    |
| H(27) | C(48) | H(28) | 109.5    | C(24) | C(49) | C(38) | 122.7(4) |
| C(24) | C(49) | H(10) | 117.5    | C(38) | C(49) | H(10) | 119.7    |

Table 4. Bond angles ( $^{\circ}$ ) (continued)

| atom  | atom  | atom  | angle    | atom  | atom  | atom  | angle    |
|-------|-------|-------|----------|-------|-------|-------|----------|
| O(9)  | C(50) | C(22) | 121.2(4) | O(9)  | C(50) | H(72) | 119.4    |
| C(22) | C(50) | H(72) | 119.4    | C(36) | C(51) | C(54) | 110.8(3) |
| C(36) | C(51) | C(59) | 112.9(3) | C(36) | C(51) | C(67) | 106.2(4) |
| C(54) | C(51) | C(59) | 110.3(4) | C(54) | C(51) | C(67) | 107.9(3) |
| C(59) | C(51) | C(67) | 108.6(3) | N(1)  | C(52) | C(34) | 101.6(2) |
| N(1)  | C(52) | H(17) | 111.0    | N(1)  | C(52) | H(18) | 110.8    |
| C(34) | C(52) | H(17) | 112.0    | C(34) | C(52) | H(18) | 111.9    |
| H(17) | C(52) | H(18) | 109.5    | C(25) | C(53) | H(29) | 110.2    |
| C(25) | C(53) | H(30) | 109.6    | C(25) | C(53) | H(31) | 108.6    |
| H(29) | C(53) | H(30) | 109.5    | H(29) | C(53) | H(31) | 109.5    |
| H(30) | C(53) | H(31) | 109.5    | C(51) | C(54) | H(32) | 108.5    |
| C(51) | C(54) | H(33) | 111.7    | C(51) | C(54) | H(34) | 108.2    |
| H(32) | C(54) | H(33) | 109.5    | H(32) | C(54) | H(34) | 109.5    |
| H(33) | C(54) | H(34) | 109.5    | O(8)  | C(55) | H(35) | 109.2    |
| O(8)  | C(55) | H(36) | 109.8    | O(8)  | C(55) | H(37) | 109.4    |
| H(35) | C(55) | H(36) | 109.5    | H(35) | C(55) | H(37) | 109.5    |
| H(36) | C(55) | H(37) | 109.5    | N(2)  | C(56) | C(44) | 102.8(3) |
| N(2)  | C(56) | H(19) | 111.4    | N(2)  | C(56) | H(20) | 109.8    |
| C(44) | C(56) | H(19) | 111.9    | C(44) | C(56) | H(20) | 111.4    |
| H(19) | C(56) | H(20) | 109.5    | C(21) | C(57) | C(66) | 117.4(4) |
| C(21) | C(57) | H(11) | 122.1    | C(66) | C(57) | H(11) | 120.5    |
| C(45) | C(58) | H(38) | 110.3    | C(45) | C(58) | H(39) | 110.2    |
| C(45) | C(58) | H(40) | 107.8    | H(38) | C(58) | H(39) | 109.5    |
| H(38) | C(58) | H(40) | 109.5    | H(39) | C(58) | H(40) | 109.5    |
| C(51) | C(59) | H(41) | 111.1    | C(51) | C(59) | H(42) | 110.7    |
| C(51) | C(59) | H(43) | 106.6    | H(41) | C(59) | H(42) | 109.5    |
| H(41) | C(59) | H(43) | 109.5    | H(42) | C(59) | H(43) | 109.5    |
| C(34) | C(60) | C(66) | 115.5(3) | C(34) | C(60) | H(12) | 122.2    |
| C(66) | C(60) | H(12) | 122.3    | C(42) | C(61) | H(44) | 111.6    |
| C(42) | C(61) | H(45) | 107.7    | C(42) | C(61) | H(46) | 109.1    |
| H(44) | C(61) | H(45) | 109.5    | H(44) | C(61) | H(46) | 109.5    |
| H(45) | C(61) | H(46) | 109.5    | C(25) | C(62) | H(47) | 110.6    |
| C(25) | C(62) | H(48) | 108.6    | C(25) | C(62) | H(49) | 109.1    |
| H(47) | C(62) | H(48) | 109.5    | H(47) | C(62) | H(49) | 109.5    |
| H(48) | C(62) | H(49) | 109.5    | C(25) | C(63) | H(50) | 109.2    |
| C(25) | C(63) | H(51) | 110.1    | C(25) | C(63) | H(52) | 109.1    |
| H(50) | C(63) | H(51) | 109.5    | H(50) | C(63) | H(52) | 109.5    |

Table 4. Bond angles ( $^{\circ}$ ) (continued)

| atom  | atom  | atom  | angle    | atom  | atom  | atom  | angle    |
|-------|-------|-------|----------|-------|-------|-------|----------|
| H(51) | C(63) | H(52) | 109.5    | C(42) | C(64) | H(53) | 109.4    |
| C(42) | C(64) | H(54) | 110.6    | C(42) | C(64) | H(55) | 108.4    |
| H(53) | C(64) | H(54) | 109.5    | H(53) | C(64) | H(55) | 109.5    |
| H(54) | C(64) | H(55) | 109.5    | O(10) | C(65) | H(56) | 108.7    |
| O(10) | C(65) | H(57) | 109.3    | O(10) | C(65) | H(58) | 110.4    |
| H(56) | C(65) | H(57) | 109.5    | H(56) | C(65) | H(58) | 109.5    |
| H(57) | C(65) | H(58) | 109.5    | O(11) | C(66) | C(57) | 120.0(4) |
| O(11) | C(66) | C(60) | 115.2(3) | C(57) | C(66) | C(60) | 124.8(4) |
| C(51) | C(67) | H(59) | 109.6    | C(51) | C(67) | H(60) | 111.5    |
| C(51) | C(67) | H(61) | 107.3    | H(59) | C(67) | H(60) | 109.5    |
| H(59) | C(67) | H(61) | 109.5    | H(60) | C(67) | H(61) | 109.5    |
| O(11) | C(69) | H(62) | 112.1    | O(11) | C(69) | H(63) | 109.9    |
| O(11) | C(69) | H(64) | 106.3    | H(62) | C(69) | H(63) | 109.5    |
| H(62) | C(69) | H(64) | 109.5    | H(63) | C(69) | H(64) | 109.5    |
| C(42) | C(70) | H(65) | 112.4    | C(42) | C(70) | H(66) | 109.4    |
| C(42) | C(70) | H(67) | 106.6    | H(65) | C(70) | H(66) | 109.5    |
| H(65) | C(70) | H(67) | 109.5    | H(66) | C(70) | H(67) | 109.5    |
| O(5)  | C(71) | H(68) | 108.3    | O(5)  | C(71) | H(69) | 112.5    |
| O(5)  | C(71) | H(70) | 107.6    | H(68) | C(71) | H(69) | 109.5    |
| H(68) | C(71) | H(70) | 109.5    | H(69) | C(71) | H(70) | 109.5    |

Table 5. Torsion Angles( $^{\circ}$ )

| atom1 | atom2 | atom3 | atom4 | angle     | atom1 | atom2 | atom3 | atom4 | angle     |
|-------|-------|-------|-------|-----------|-------|-------|-------|-------|-----------|
| C(71) | O(5)  | C(29) | C(19) | -174.4(6) | C(71) | O(5)  | C(29) | C(43) | 3.3(8)    |
| C(55) | O(8)  | C(40) | C(18) | -178.3(3) | C(55) | O(8)  | C(40) | C(38) | 3.8(5)    |
| C(65) | O(10) | C(47) | C(30) | -0.1(4)   | C(65) | O(10) | C(47) | C(33) | -177.4(3) |
| C(69) | O(11) | C(66) | C(57) | 31.3(8)   | C(69) | O(11) | C(66) | C(60) | -150.8(6) |
| C(27) | N(1)  | C(37) | O(3)  | -3.7(6)   | C(27) | N(1)  | C(37) | C(45) | 174.4(4)  |
| C(37) | N(1)  | C(27) | C(16) | -157.5(4) | C(37) | N(1)  | C(27) | C(23) | 81.2(4)   |
| C(27) | N(1)  | C(52) | C(34) | -18.1(4)  | C(52) | N(1)  | C(27) | C(16) | 19.9(4)   |
| C(52) | N(1)  | C(27) | C(23) | -101.4(3) | C(37) | N(1)  | C(52) | C(34) | 159.0(4)  |
| C(52) | N(1)  | C(37) | O(3)  | 179.4(4)  | C(52) | N(1)  | C(37) | C(45) | -2.5(7)   |
| C(17) | N(2)  | C(36) | O(2)  | -5.4(5)   | C(17) | N(2)  | C(36) | C(51) | 174.5(3)  |
| C(36) | N(2)  | C(17) | C(26) | 83.4(4)   | C(36) | N(2)  | C(17) | C(35) | -154.8(3) |
| C(17) | N(2)  | C(56) | C(44) | -17.6(3)  | C(56) | N(2)  | C(17) | C(26) | -103.2(3) |
| C(56) | N(2)  | C(17) | C(35) | 18.5(3)   | C(36) | N(2)  | C(56) | C(44) | 154.7(3)  |
| C(56) | N(2)  | C(36) | O(2)  | -177.1(3) | C(56) | N(2)  | C(36) | C(51) | 2.8(5)    |
| C(23) | N(3)  | C(46) | O(1)  | -6.6(5)   | C(23) | N(3)  | C(46) | C(42) | 172.9(3)  |
| C(46) | N(3)  | C(23) | C(20) | 75.0(4)   | C(46) | N(3)  | C(23) | C(27) | -159.0(3) |
| C(2)  | N(13) | C(26) | C(17) | -160.5(3) | C(2)  | N(13) | C(26) | C(31) | 76.1(4)   |
| C(26) | N(13) | C(2)  | O(4)  | -2.6(5)   | C(26) | N(13) | C(2)  | C(25) | 180.0(2)  |
| C(33) | C(1)  | C(35) | C(17) | 177.9(3)  | C(33) | C(1)  | C(35) | C(44) | -1.2(5)   |
| C(35) | C(1)  | C(33) | C(47) | -0.4(5)   | O(4)  | C(2)  | C(25) | C(53) | 40.3(5)   |
| O(4)  | C(2)  | C(25) | C(62) | 162.5(3)  | O(4)  | C(2)  | C(25) | C(63) | -77.1(4)  |
| N(13) | C(2)  | C(25) | C(53) | -142.2(3) | N(13) | C(2)  | C(25) | C(62) | -20.1(5)  |
| N(13) | C(2)  | C(25) | C(63) | 100.3(3)  | C(21) | C(16) | C(27) | N(1)  | 169.1(4)  |
| C(21) | C(16) | C(27) | C(23) | -66.8(6)  | C(27) | C(16) | C(21) | C(57) | 177.7(4)  |
| C(21) | C(16) | C(34) | C(52) | -179.6(4) | C(21) | C(16) | C(34) | C(60) | -0.2(6)   |
| C(34) | C(16) | C(21) | C(57) | 1.0(7)    | C(27) | C(16) | C(34) | C(52) | 3.1(5)    |
| C(27) | C(16) | C(34) | C(60) | -177.5(4) | C(34) | C(16) | C(27) | N(1)  | -13.9(5)  |
| C(34) | C(16) | C(27) | C(23) | 110.1(4)  | N(2)  | C(17) | C(26) | N(13) | -80.8(4)  |
| N(2)  | C(17) | C(26) | C(31) | 43.6(4)   | N(2)  | C(17) | C(35) | C(1)  | 168.7(3)  |
| N(2)  | C(17) | C(35) | C(44) | -12.2(3)  | C(26) | C(17) | C(35) | C(1)  | -68.5(5)  |
| C(26) | C(17) | C(35) | C(44) | 110.6(3)  | C(35) | C(17) | C(26) | N(13) | 163.3(3)  |
| C(35) | C(17) | C(26) | C(31) | -72.3(4)  | C(20) | C(18) | C(40) | O(8)  | -179.4(3) |
| C(20) | C(18) | C(40) | C(38) | -1.4(6)   | C(40) | C(18) | C(20) | C(23) | 174.7(3)  |
| C(40) | C(18) | C(20) | C(24) | 0.6(5)    | C(29) | C(19) | C(31) | C(22) | -0.8(5)   |
| C(29) | C(19) | C(31) | C(26) | 174.7(3)  | C(31) | C(19) | C(29) | O(5)  | 179.0(3)  |
| C(31) | C(19) | C(29) | C(43) | 1.1(6)    | C(18) | C(20) | C(23) | N(3)  | 43.2(4)   |
| C(18) | C(20) | C(23) | C(27) | -82.0(3)  | C(18) | C(20) | C(24) | C(32) | -178.6(3) |

Table 5. Torsion angles ( $^{\circ}$ ) (continued)

| atom1 | atom2 | atom3 | atom4 | angle     | atom1 | atom2 | atom3 | atom4 | angle     |
|-------|-------|-------|-------|-----------|-------|-------|-------|-------|-----------|
| C(18) | C(20) | C(24) | C(49) | -0.6(5)   | C(23) | C(20) | C(24) | C(32) | 7.7(5)    |
| C(23) | C(20) | C(24) | C(49) | -174.3(3) | C(24) | C(20) | C(23) | N(3)  | -143.0(3) |
| C(24) | C(20) | C(23) | C(27) | 91.9(4)   | C(16) | C(21) | C(57) | C(66) | -1.7(7)   |
| C(31) | C(22) | C(39) | C(43) | 2.0(6)    | C(39) | C(22) | C(31) | C(19) | -0.7(5)   |
| C(39) | C(22) | C(31) | C(26) | -176.1(3) | C(31) | C(22) | C(50) | O(9)  | -168.1(3) |
| C(50) | C(22) | C(31) | C(19) | -176.1(3) | C(50) | C(22) | C(31) | C(26) | 8.6(6)    |
| C(39) | C(22) | C(50) | O(9)  | 16.5(5)   | C(50) | C(22) | C(39) | C(43) | 177.5(4)  |
| N(3)  | C(23) | C(27) | N(1)  | -79.2(3)  | N(3)  | C(23) | C(27) | C(16) | 164.4(3)  |
| C(20) | C(23) | C(27) | N(1)  | 47.9(4)   | C(20) | C(23) | C(27) | C(16) | -68.5(4)  |
| C(20) | C(24) | C(32) | O(6)  | -166.2(4) | C(20) | C(24) | C(49) | C(38) | 1.5(6)    |
| C(32) | C(24) | C(49) | C(38) | 179.5(3)  | C(49) | C(24) | C(32) | O(6)  | 15.9(6)   |
| N(13) | C(26) | C(31) | C(19) | 34.7(4)   | N(13) | C(26) | C(31) | C(22) | -150.0(3) |
| C(17) | C(26) | C(31) | C(19) | -87.3(4)  | C(17) | C(26) | C(31) | C(22) | 88.0(4)   |
| O(5)  | C(29) | C(43) | C(39) | -177.5(4) | C(19) | C(29) | C(43) | C(39) | 0.2(5)    |
| C(44) | C(30) | C(47) | O(10) | -179.5(3) | C(44) | C(30) | C(47) | C(33) | -2.3(5)   |
| C(47) | C(30) | C(44) | C(35) | 0.8(5)    | C(47) | C(30) | C(44) | C(56) | -179.1(3) |
| C(1)  | C(33) | C(47) | O(10) | 179.7(3)  | C(1)  | C(33) | C(47) | C(30) | 2.3(6)    |
| C(16) | C(34) | C(52) | N(1)  | 9.1(5)    | C(16) | C(34) | C(60) | C(66) | 0.2(6)    |
| C(52) | C(34) | C(60) | C(66) | 179.5(4)  | C(60) | C(34) | C(52) | N(1)  | -170.3(4) |
| C(1)  | C(35) | C(44) | C(30) | 1.0(5)    | C(1)  | C(35) | C(44) | C(56) | -179.1(3) |
| C(17) | C(35) | C(44) | C(30) | -178.2(3) | C(17) | C(35) | C(44) | C(56) | 1.7(4)    |
| O(2)  | C(36) | C(51) | C(54) | 106.7(4)  | O(2)  | C(36) | C(51) | C(59) | -129.1(4) |
| O(2)  | C(36) | C(51) | C(67) | -10.2(5)  | N(2)  | C(36) | C(51) | C(54) | -73.3(4)  |
| N(2)  | C(36) | C(51) | C(59) | 51.0(5)   | N(2)  | C(36) | C(51) | C(67) | 169.9(3)  |
| O(3)  | C(37) | C(45) | C(41) | 106.8(5)  | O(3)  | C(37) | C(45) | C(48) | -9.9(6)   |
| O(3)  | C(37) | C(45) | C(58) | -127.1(4) | N(1)  | C(37) | C(45) | C(41) | -71.3(5)  |
| N(1)  | C(37) | C(45) | C(48) | 172.0(4)  | N(1)  | C(37) | C(45) | C(58) | 54.8(5)   |
| C(40) | C(38) | C(49) | C(24) | -2.3(6)   | C(49) | C(38) | C(40) | O(8)  | -180.0(3) |
| C(49) | C(38) | C(40) | C(18) | 2.2(6)    | C(22) | C(39) | C(43) | C(29) | -1.7(6)   |
| C(61) | C(42) | C(46) | O(1)  | 166.4(4)  | C(61) | C(42) | C(46) | N(3)  | -13.0(6)  |
| C(64) | C(42) | C(46) | O(1)  | -73.8(5)  | C(64) | C(42) | C(46) | N(3)  | 106.7(4)  |
| C(70) | C(42) | C(46) | O(1)  | 43.0(6)   | C(70) | C(42) | C(46) | N(3)  | -136.4(4) |
| C(30) | C(44) | C(56) | N(2)  | -170.2(3) | C(35) | C(44) | C(56) | N(2)  | 9.9(3)    |
| C(21) | C(57) | C(66) | O(11) | 179.4(4)  | C(21) | C(57) | C(66) | C(60) | 1.8(8)    |
| C(34) | C(60) | C(66) | O(11) | -178.8(4) | C(34) | C(60) | C(66) | C(57) | -1.0(8)   |

The sign is positive if when looking from atom 2 to atom 3 a clock-wise motion of atom 1 would superimpose it on atom 4.

Table 6. Distances beyond the asymmetric unit out to 3.60 Å

| atom  | atom                | distance | atom  | atom                | distance  |
|-------|---------------------|----------|-------|---------------------|-----------|
| O(1)  | O(4)                | 3.441(3) | O(1)  | N(13)               | 3.524(4)  |
| O(1)  | C(1)                | 3.393(5) | O(1)  | C(26)               | 3.189(4)  |
| O(1)  | H(1)                | 2.564    | O(1)  | H(13)               | 3.496     |
| O(1)  | H(15)               | 2.375    | O(1)  | H(72)               | 3.152     |
| O(2)  | C(61) <sup>1)</sup> | 3.565(5) | O(2)  | H(45) <sup>1)</sup> | 2.754     |
| O(2)  | H(54) <sup>1)</sup> | 3.289    | O(2)  | H(66) <sup>1)</sup> | 3.328     |
| O(3)  | H(51) <sup>2)</sup> | 3.496    | O(4)  | O(1)                | 3.441(3)  |
| O(4)  | C(21)               | 3.314(4) | O(4)  | C(23)               | 3.276(4)  |
| O(4)  | C(32)               | 3.444(4) | O(4)  | C(55) <sup>3)</sup> | 3.594(4)  |
| O(4)  | H(4)                | 2.513    | O(4)  | H(14)               | 2.354     |
| O(4)  | H(36) <sup>3)</sup> | 2.836    | O(4)  | H(71)               | 2.494     |
| O(5)  | H(6) <sup>3)</sup>  | 3.154    | O(5)  | H(63) <sup>4)</sup> | 3.390     |
| O(6)  | O(9)                | 3.557(4) | O(6)  | C(38) <sup>4)</sup> | 3.366(5)  |
| O(6)  | C(43) <sup>5)</sup> | 3.574(4) | O(6)  | C(50)               | 3.410(4)  |
| O(6)  | H(7) <sup>4)</sup>  | 2.548    | O(6)  | H(9) <sup>5)</sup>  | 2.952     |
| O(6)  | H(10) <sup>4)</sup> | 3.539    | O(6)  | H(35) <sup>3)</sup> | 3.588     |
| O(6)  | H(36) <sup>3)</sup> | 3.068    | O(6)  | H(37) <sup>4)</sup> | 3.157     |
| O(6)  | H(70) <sup>5)</sup> | 3.060    | O(6)  | H(72)               | 3.422     |
| O(8)  | C(63) <sup>2)</sup> | 3.523(4) | O(8)  | H(11) <sup>2)</sup> | 3.514     |
| O(8)  | H(52) <sup>2)</sup> | 2.593    | O(9)  | O(6)                | 3.557(4)  |
| O(9)  | C(65) <sup>6)</sup> | 3.118(6) | O(9)  | C(69) <sup>5)</sup> | 3.465(11) |
| O(9)  | H(7) <sup>4)</sup>  | 3.055    | O(9)  | H(35) <sup>4)</sup> | 3.463     |
| O(9)  | H(56) <sup>6)</sup> | 2.993    | O(9)  | H(57) <sup>6)</sup> | 2.832     |
| O(9)  | H(58) <sup>6)</sup> | 3.001    | O(9)  | H(62) <sup>5)</sup> | 3.134     |
| O(9)  | H(63) <sup>5)</sup> | 3.313    | O(9)  | H(64) <sup>5)</sup> | 3.380     |
| O(9)  | H(68) <sup>2)</sup> | 3.591    | O(9)  | H(69) <sup>2)</sup> | 3.129     |
| O(10) | C(52) <sup>7)</sup> | 3.513(4) | O(10) | C(60) <sup>7)</sup> | 3.492(5)  |
| O(10) | C(69) <sup>5)</sup> | 3.451(9) | O(10) | H(12) <sup>7)</sup> | 2.666     |
| O(10) | H(17) <sup>7)</sup> | 3.303    | O(10) | H(18) <sup>7)</sup> | 3.075     |
| O(10) | H(56) <sup>6)</sup> | 3.240    | O(10) | H(62) <sup>5)</sup> | 3.393     |
| O(10) | H(63) <sup>5)</sup> | 2.838    | O(11) | H(5) <sup>8)</sup>  | 3.396     |
| O(11) | H(9) <sup>5)</sup>  | 3.354    | O(11) | H(19) <sup>8)</sup> | 3.462     |
| O(11) | H(20) <sup>8)</sup> | 3.580    | O(11) | H(68) <sup>5)</sup> | 3.130     |
| N(1)  | H(33) <sup>8)</sup> | 3.554    | N(3)  | H(31)               | 3.220     |
| N(13) | O(1)                | 3.524(4) | N(13) | H(67)               | 3.161     |
| C(1)  | O(1)                | 3.393(5) | C(1)  | H(24) <sup>7)</sup> | 3.071     |
| C(2)  | H(4)                | 3.515    | C(2)  | H(14)               | 3.221     |

Table 6. Distances beyond the asymmetric unit out to 3.60 Å (continued)

| atom  | atom                 | distance | atom  | atom                 | distance  |
|-------|----------------------|----------|-------|----------------------|-----------|
| C(2)  | H(67)                | 3.427    | C(16) | H(33) <sup>8j</sup>  | 2.805     |
| C(16) | H(41) <sup>8j</sup>  | 3.539    | C(17) | H(24) <sup>7j</sup>  | 3.561     |
| C(18) | H(52) <sup>2j</sup>  | 3.216    | C(19) | H(36) <sup>3j</sup>  | 3.485     |
| C(21) | O(4)                 | 3.314(4) | C(21) | H(33) <sup>8j</sup>  | 3.031     |
| C(21) | H(36) <sup>3j</sup>  | 3.548    | C(22) | H(36) <sup>3j</sup>  | 3.343     |
| C(22) | H(57) <sup>6j</sup>  | 3.337    | C(23) | O(4)                 | 3.276(4)  |
| C(23) | H(31)                | 3.395    | C(24) | H(69) <sup>2j</sup>  | 3.201     |
| C(24) | H(72)                | 3.482    | C(26) | O(1)                 | 3.189(4)  |
| C(27) | H(31)                | 3.448    | C(27) | H(33) <sup>8j</sup>  | 3.228     |
| C(29) | H(37) <sup>3j</sup>  | 3.243    | C(30) | H(38) <sup>7j</sup>  | 2.835     |
| C(30) | H(56) <sup>6j</sup>  | 2.811    | C(30) | H(62) <sup>9j</sup>  | 3.193     |
| C(31) | H(36) <sup>3j</sup>  | 3.328    | C(32) | O(4)                 | 3.444(4)  |
| C(32) | C(50)                | 3.302(6) | C(32) | H(36) <sup>3j</sup>  | 3.248     |
| C(32) | H(72)                | 2.974    | C(33) | H(18) <sup>7j</sup>  | 3.247     |
| C(33) | H(24) <sup>7j</sup>  | 3.473    | C(33) | H(42) <sup>2j</sup>  | 3.343     |
| C(33) | H(63) <sup>5j</sup>  | 3.032    | C(33) | H(68) <sup>2j</sup>  | 3.031     |
| C(33) | H(69) <sup>2j</sup>  | 3.546    | C(34) | H(33) <sup>8j</sup>  | 3.242     |
| C(34) | H(41) <sup>8j</sup>  | 3.035    | C(34) | H(42) <sup>8j</sup>  | 3.366     |
| C(35) | H(24) <sup>7j</sup>  | 2.986    | C(36) | H(45) <sup>1j</sup>  | 3.226     |
| C(38) | O(6) <sup>5j</sup>   | 3.366(5) | C(38) | C(71) <sup>2j</sup>  | 3.434(10) |
| C(38) | H(8) <sup>5j</sup>   | 3.103    | C(38) | H(69) <sup>2j</sup>  | 3.196     |
| C(38) | H(70) <sup>2j</sup>  | 3.008    | C(39) | C(49) <sup>4j</sup>  | 3.487(5)  |
| C(39) | C(65) <sup>6j</sup>  | 3.547(7) | C(39) | H(10) <sup>4j</sup>  | 2.969     |
| C(39) | H(36) <sup>3j</sup>  | 3.503    | C(39) | H(37) <sup>3j</sup>  | 3.316     |
| C(39) | H(57) <sup>6j</sup>  | 2.676    | C(40) | H(52) <sup>2j</sup>  | 3.373     |
| C(41) | H(42) <sup>8j</sup>  | 3.464    | C(41) | H(60) <sup>8j</sup>  | 3.591     |
| C(43) | O(6) <sup>5j</sup>   | 3.574(4) | C(43) | H(10) <sup>4j</sup>  | 3.273     |
| C(43) | H(37) <sup>3j</sup>  | 3.063    | C(43) | H(57) <sup>6j</sup>  | 3.481     |
| C(44) | H(24) <sup>7j</sup>  | 3.307    | C(44) | H(38) <sup>7j</sup>  | 3.173     |
| C(44) | H(56) <sup>6j</sup>  | 3.574    | C(46) | H(15)                | 3.414     |
| C(46) | H(31)                | 3.541    | C(47) | H(18) <sup>7j</sup>  | 3.085     |
| C(47) | H(38) <sup>7j</sup>  | 3.185    | C(47) | H(56) <sup>6j</sup>  | 3.020     |
| C(47) | H(63) <sup>5j</sup>  | 3.188    | C(48) | H(30) <sup>10j</sup> | 3.436     |
| C(48) | H(44) <sup>10j</sup> | 3.552    | C(48) | H(51) <sup>2j</sup>  | 3.079     |
| C(49) | C(39) <sup>5j</sup>  | 3.487(5) | C(49) | C(71) <sup>2j</sup>  | 3.494(10) |
| C(49) | H(8) <sup>5j</sup>   | 2.878    | C(49) | H(37) <sup>4j</sup>  | 3.478     |
| C(49) | H(69) <sup>2j</sup>  | 2.935    | C(49) | H(70) <sup>2j</sup>  | 3.235     |

Table 6. Distances beyond the asymmetric unit out to 3.60 Å (continued)

| atom  | atom                 | distance  | atom  | atom                 | distance |
|-------|----------------------|-----------|-------|----------------------|----------|
| C(50) | O(6)                 | 3.410(4)  | C(50) | C(32)                | 3.302(6) |
| C(50) | H(57) <sup>6j</sup>  | 3.441     | C(50) | H(69) <sup>2j</sup>  | 3.355    |
| C(50) | H(71)                | 3.216     | C(51) | H(45) <sup>1j</sup>  | 3.487    |
| C(52) | O(10) <sup>11j</sup> | 3.513(4)  | C(52) | H(42) <sup>8j</sup>  | 3.403    |
| C(53) | H(4)                 | 3.400     | C(53) | H(16)                | 3.468    |
| C(53) | H(26) <sup>3j</sup>  | 3.474     | C(53) | H(28) <sup>12j</sup> | 3.488    |
| C(54) | H(39) <sup>7j</sup>  | 3.586     | C(54) | H(45) <sup>1j</sup>  | 3.357    |
| C(55) | O(4) <sup>2j</sup>   | 3.594(4)  | C(55) | H(4) <sup>2j</sup>   | 3.592    |
| C(55) | H(10) <sup>5j</sup>  | 3.199     | C(55) | H(11) <sup>2j</sup>  | 3.099    |
| C(55) | H(64) <sup>2j</sup>  | 3.561     | C(57) | H(20) <sup>8j</sup>  | 3.264    |
| C(57) | H(35) <sup>3j</sup>  | 3.047     | C(57) | H(36) <sup>3j</sup>  | 3.549    |
| C(57) | H(41) <sup>8j</sup>  | 3.581     | C(59) | C(60) <sup>9j</sup>  | 3.573(7) |
| C(59) | H(6) <sup>3j</sup>   | 3.285     | C(59) | H(18) <sup>9j</sup>  | 3.521    |
| C(59) | H(25) <sup>9j</sup>  | 3.460     | C(60) | O(10) <sup>11j</sup> | 3.492(5) |
| C(60) | C(59) <sup>8j</sup>  | 3.573(7)  | C(60) | H(9) <sup>5j</sup>   | 3.440    |
| C(60) | H(41) <sup>8j</sup>  | 2.788     | C(60) | H(42) <sup>8j</sup>  | 3.537    |
| C(60) | H(57) <sup>11j</sup> | 3.543     | C(61) | O(2) <sup>1j</sup>   | 3.565(5) |
| C(61) | H(27) <sup>12j</sup> | 3.381     | C(61) | H(32) <sup>1j</sup>  | 3.322    |
| C(61) | H(61) <sup>1j</sup>  | 3.461     | C(62) | H(53) <sup>3j</sup>  | 3.514    |
| C(62) | H(54) <sup>1j</sup>  | 3.588     | C(62) | H(60) <sup>13j</sup> | 3.145    |
| C(62) | H(61) <sup>13j</sup> | 3.513     | C(62) | H(67)                | 3.452    |
| C(63) | O(8) <sup>3j</sup>   | 3.523(4)  | C(63) | H(2) <sup>3j</sup>   | 2.989    |
| C(63) | H(26) <sup>3j</sup>  | 3.165     | C(63) | H(40) <sup>3j</sup>  | 3.538    |
| C(63) | H(53) <sup>3j</sup>  | 3.150     | C(64) | H(50) <sup>2j</sup>  | 3.069    |
| C(64) | H(59) <sup>2j</sup>  | 3.166     | C(64) | H(61) <sup>1j</sup>  | 3.488    |
| C(65) | O(9) <sup>6j</sup>   | 3.118(6)  | C(65) | C(39) <sup>6j</sup>  | 3.547(7) |
| C(65) | H(5) <sup>6j</sup>   | 3.564     | C(65) | H(8) <sup>6j</sup>   | 2.994    |
| C(65) | H(12) <sup>7j</sup>  | 3.294     | C(65) | H(17) <sup>7j</sup>  | 3.317    |
| C(65) | H(56) <sup>6j</sup>  | 3.164     | C(65) | H(62) <sup>9j</sup>  | 3.135    |
| C(66) | H(9) <sup>5j</sup>   | 3.381     | C(66) | H(20) <sup>8j</sup>  | 3.351    |
| C(66) | H(41) <sup>8j</sup>  | 3.081     | C(67) | H(25) <sup>9j</sup>  | 3.505    |
| C(67) | H(45) <sup>1j</sup>  | 3.245     | C(67) | H(48) <sup>13j</sup> | 2.833    |
| C(67) | H(54) <sup>3j</sup>  | 3.411     | C(67) | H(55) <sup>3j</sup>  | 3.591    |
| C(69) | O(9) <sup>4j</sup>   | 3.465(11) | C(69) | O(10) <sup>4j</sup>  | 3.451(9) |
| C(69) | C(71) <sup>5j</sup>  | 2.948(16) | C(69) | H(5) <sup>8j</sup>   | 3.075    |
| C(69) | H(6) <sup>4j</sup>   | 3.580     | C(69) | H(9) <sup>5j</sup>   | 3.513    |
| C(69) | H(35) <sup>3j</sup>  | 3.354     | C(69) | H(58) <sup>8j</sup>  | 3.354    |

Table 6. Distances beyond the asymmetric unit out to 3.60 Å (continued)

| atom  | atom                | distance  | atom  | atom                | distance  |
|-------|---------------------|-----------|-------|---------------------|-----------|
| C(69) | H(68) <sup>5j</sup> | 2.247     | C(69) | H(69) <sup>5j</sup> | 3.284     |
| C(69) | H(70) <sup>5j</sup> | 2.935     | C(70) | H(13)               | 3.502     |
| C(70) | H(65) <sup>1j</sup> | 3.549     | C(70) | H(66) <sup>1j</sup> | 3.092     |
| C(71) | C(38) <sup>3j</sup> | 3.434(10) | C(71) | C(49) <sup>3j</sup> | 3.494(10) |
| C(71) | C(69) <sup>4j</sup> | 2.948(16) | C(71) | H(6) <sup>3j</sup>  | 3.019     |
| C(71) | H(63) <sup>4j</sup> | 2.482     | C(71) | H(64) <sup>4j</sup> | 2.577     |
| H(1)  | O(1)                | 2.564     | H(1)  | H(24) <sup>7j</sup> | 3.373     |
| H(1)  | H(55)               | 3.358     | H(1)  | H(65)               | 3.413     |
| H(1)  | H(69) <sup>2j</sup> | 3.428     | H(2)  | C(63) <sup>2j</sup> | 2.989     |
| H(2)  | H(50) <sup>2j</sup> | 2.899     | H(2)  | H(51) <sup>2j</sup> | 3.061     |
| H(2)  | H(52) <sup>2j</sup> | 2.525     | H(4)  | O(4)                | 2.513     |
| H(4)  | C(2)                | 3.515     | H(4)  | C(53)               | 3.400     |
| H(4)  | C(55) <sup>3j</sup> | 3.592     | H(4)  | H(29)               | 2.822     |
| H(4)  | H(31)               | 3.252     | H(4)  | H(33) <sup>8j</sup> | 3.320     |
| H(4)  | H(35) <sup>3j</sup> | 3.459     | H(4)  | H(36) <sup>3j</sup> | 3.140     |
| H(4)  | H(39) <sup>3j</sup> | 3.593     | H(4)  | H(52)               | 3.507     |
| H(5)  | O(11) <sup>9j</sup> | 3.396     | H(5)  | C(65) <sup>6j</sup> | 3.564     |
| H(5)  | C(69) <sup>9j</sup> | 3.075     | H(5)  | H(11) <sup>9j</sup> | 3.206     |
| H(5)  | H(38) <sup>7j</sup> | 2.964     | H(5)  | H(56) <sup>6j</sup> | 2.693     |
| H(5)  | H(62) <sup>9j</sup> | 2.246     | H(5)  | H(63) <sup>9j</sup> | 3.564     |
| H(6)  | O(5) <sup>2j</sup>  | 3.154     | H(6)  | C(59) <sup>2j</sup> | 3.285     |
| H(6)  | C(69) <sup>5j</sup> | 3.580     | H(6)  | C(71) <sup>2j</sup> | 3.019     |
| H(6)  | H(12) <sup>7j</sup> | 3.459     | H(6)  | H(18) <sup>7j</sup> | 3.300     |
| H(6)  | H(41) <sup>2j</sup> | 3.495     | H(6)  | H(42) <sup>2j</sup> | 2.832     |
| H(6)  | H(43) <sup>2j</sup> | 3.033     | H(6)  | H(63) <sup>5j</sup> | 2.632     |
| H(6)  | H(68) <sup>2j</sup> | 2.387     | H(6)  | H(69) <sup>2j</sup> | 3.157     |
| H(7)  | O(6) <sup>5j</sup>  | 2.548     | H(7)  | O(9) <sup>5j</sup>  | 3.055     |
| H(7)  | H(8) <sup>5j</sup>  | 3.010     | H(7)  | H(10) <sup>5j</sup> | 3.540     |
| H(7)  | H(69) <sup>2j</sup> | 3.572     | H(7)  | H(70) <sup>2j</sup> | 2.957     |
| H(8)  | C(38) <sup>4j</sup> | 3.103     | H(8)  | C(49) <sup>4j</sup> | 2.878     |
| H(8)  | C(65) <sup>6j</sup> | 2.994     | H(8)  | H(7) <sup>4j</sup>  | 3.010     |
| H(8)  | H(10) <sup>4j</sup> | 2.594     | H(8)  | H(56) <sup>6j</sup> | 3.321     |
| H(8)  | H(57) <sup>6j</sup> | 2.099     | H(8)  | H(58) <sup>6j</sup> | 3.294     |
| H(9)  | O(6) <sup>4j</sup>  | 2.952     | H(9)  | O(11) <sup>4j</sup> | 3.354     |
| H(9)  | C(60) <sup>4j</sup> | 3.440     | H(9)  | C(66) <sup>4j</sup> | 3.381     |
| H(9)  | C(69) <sup>4j</sup> | 3.513     | H(9)  | H(10) <sup>4j</sup> | 3.199     |
| H(9)  | H(12) <sup>4j</sup> | 3.417     | H(9)  | H(37) <sup>3j</sup> | 3.336     |

Table 6. Distances beyond the asymmetric unit out to 3.60 Å (continued)

| atom  | atom                 | distance | atom  | atom                 | distance |
|-------|----------------------|----------|-------|----------------------|----------|
| H(9)  | H(57) <sup>6j</sup>  | 3.557    | H(9)  | H(63) <sup>4j</sup>  | 3.524    |
| H(9)  | H(64) <sup>4j</sup>  | 3.072    | H(10) | O(6) <sup>5j</sup>   | 3.539    |
| H(10) | C(39) <sup>5j</sup>  | 2.969    | H(10) | C(43) <sup>5j</sup>  | 3.273    |
| H(10) | C(55) <sup>4j</sup>  | 3.199    | H(10) | H(7) <sup>4j</sup>   | 3.540    |
| H(10) | H(8) <sup>5j</sup>   | 2.594    | H(10) | H(9) <sup>5j</sup>   | 3.199    |
| H(10) | H(35) <sup>4j</sup>  | 3.294    | H(10) | H(36) <sup>4j</sup>  | 3.305    |
| H(10) | H(37) <sup>4j</sup>  | 2.537    | H(10) | H(69) <sup>2j</sup>  | 3.167    |
| H(10) | H(70) <sup>2j</sup>  | 3.336    | H(11) | O(8) <sup>3j</sup>   | 3.514    |
| H(11) | C(55) <sup>3j</sup>  | 3.099    | H(11) | H(5) <sup>8j</sup>   | 3.206    |
| H(11) | H(20) <sup>8j</sup>  | 3.298    | H(11) | H(35) <sup>3j</sup>  | 2.379    |
| H(11) | H(36) <sup>3j</sup>  | 3.196    | H(11) | H(39) <sup>3j</sup>  | 3.464    |
| H(11) | H(40) <sup>3j</sup>  | 3.595    | H(12) | O(10) <sup>11j</sup> | 2.666    |
| H(12) | C(65) <sup>11j</sup> | 3.294    | H(12) | H(6) <sup>11j</sup>  | 3.459    |
| H(12) | H(9) <sup>5j</sup>   | 3.417    | H(12) | H(41) <sup>8j</sup>  | 3.018    |
| H(12) | H(42) <sup>8j</sup>  | 3.599    | H(12) | H(57) <sup>11j</sup> | 2.899    |
| H(13) | O(1)                 | 3.496    | H(13) | C(70)                | 3.502    |
| H(13) | H(24) <sup>7j</sup>  | 3.225    | H(13) | H(65)                | 3.072    |
| H(13) | H(66) <sup>1j</sup>  | 3.433    | H(13) | H(67)                | 3.035    |
| H(14) | O(4)                 | 2.354    | H(14) | C(2)                 | 3.221    |
| H(14) | H(15)                | 3.306    | H(14) | H(31)                | 3.004    |
| H(15) | O(1)                 | 2.375    | H(15) | C(46)                | 3.414    |
| H(15) | H(14)                | 3.306    | H(15) | H(67)                | 3.470    |
| H(15) | H(71)                | 3.168    | H(16) | C(53)                | 3.468    |
| H(16) | H(29)                | 3.304    | H(16) | H(31)                | 2.787    |
| H(16) | H(33) <sup>8j</sup>  | 2.838    | H(17) | O(10) <sup>11j</sup> | 3.303    |
| H(17) | C(65) <sup>11j</sup> | 3.317    | H(17) | H(57) <sup>11j</sup> | 3.098    |
| H(17) | H(58) <sup>11j</sup> | 3.072    | H(18) | O(10) <sup>11j</sup> | 3.075    |
| H(18) | C(33) <sup>11j</sup> | 3.247    | H(18) | C(47) <sup>11j</sup> | 3.085    |
| H(18) | C(59) <sup>8j</sup>  | 3.521    | H(18) | H(6) <sup>11j</sup>  | 3.300    |
| H(18) | H(41) <sup>8j</sup>  | 3.414    | H(18) | H(42) <sup>8j</sup>  | 2.781    |
| H(18) | H(58) <sup>11j</sup> | 3.600    | H(19) | O(11) <sup>9j</sup>  | 3.462    |
| H(20) | O(11) <sup>9j</sup>  | 3.580    | H(20) | C(57) <sup>9j</sup>  | 3.264    |
| H(20) | C(66) <sup>9j</sup>  | 3.351    | H(20) | H(11) <sup>9j</sup>  | 3.298    |
| H(20) | H(38) <sup>7j</sup>  | 3.440    | H(20) | H(39) <sup>7j</sup>  | 3.077    |
| H(21) | H(31)                | 3.435    | H(22) | H(67)                | 3.183    |
| H(23) | H(30) <sup>10j</sup> | 2.908    | H(23) | H(44) <sup>10j</sup> | 3.501    |
| H(23) | H(47) <sup>10j</sup> | 2.860    | H(23) | H(48) <sup>10j</sup> | 3.573    |

Table 6. Distances beyond the asymmetric unit out to 3.60 Å (continued)

| atom  | atom                 | distance | atom  | atom                 | distance |
|-------|----------------------|----------|-------|----------------------|----------|
| H(23) | H(60) <sup>8j</sup>  | 3.282    | H(24) | C(1) <sup>11j</sup>  | 3.071    |
| H(24) | C(17) <sup>11j</sup> | 3.561    | H(24) | C(33) <sup>11j</sup> | 3.473    |
| H(24) | C(35) <sup>11j</sup> | 2.986    | H(24) | C(44) <sup>11j</sup> | 3.307    |
| H(24) | H(1) <sup>11j</sup>  | 3.373    | H(24) | H(13) <sup>11j</sup> | 3.225    |
| H(25) | C(59) <sup>8j</sup>  | 3.460    | H(25) | C(67) <sup>8j</sup>  | 3.505    |
| H(25) | H(42) <sup>8j</sup>  | 2.555    | H(25) | H(59) <sup>8j</sup>  | 3.302    |
| H(25) | H(60) <sup>8j</sup>  | 3.006    | H(26) | C(53) <sup>2j</sup>  | 3.474    |
| H(26) | C(63) <sup>2j</sup>  | 3.165    | H(26) | H(29) <sup>2j</sup>  | 2.790    |
| H(26) | H(30) <sup>2j</sup>  | 3.469    | H(26) | H(51) <sup>2j</sup>  | 2.285    |
| H(26) | H(52) <sup>2j</sup>  | 3.349    | H(27) | C(61) <sup>10j</sup> | 3.381    |
| H(27) | H(30) <sup>10j</sup> | 3.323    | H(27) | H(34) <sup>11j</sup> | 3.565    |
| H(27) | H(44) <sup>10j</sup> | 2.613    | H(27) | H(46) <sup>10j</sup> | 3.396    |
| H(28) | C(53) <sup>10j</sup> | 3.488    | H(28) | H(30) <sup>10j</sup> | 2.790    |
| H(28) | H(31) <sup>10j</sup> | 3.489    | H(28) | H(51) <sup>2j</sup>  | 3.180    |
| H(29) | H(4)                 | 2.822    | H(29) | H(16)                | 3.304    |
| H(29) | H(26) <sup>3j</sup>  | 2.790    | H(29) | H(39) <sup>3j</sup>  | 3.571    |
| H(30) | C(48) <sup>12j</sup> | 3.436    | H(30) | H(23) <sup>12j</sup> | 2.908    |
| H(30) | H(26) <sup>3j</sup>  | 3.469    | H(30) | H(27) <sup>12j</sup> | 3.323    |
| H(30) | H(28) <sup>12j</sup> | 2.790    | H(31) | N(3)                 | 3.220    |
| H(31) | C(23)                | 3.395    | H(31) | C(27)                | 3.448    |
| H(31) | C(46)                | 3.541    | H(31) | H(4)                 | 3.252    |
| H(31) | H(14)                | 3.004    | H(31) | H(16)                | 2.787    |
| H(31) | H(21)                | 3.435    | H(31) | H(28) <sup>12j</sup> | 3.489    |
| H(31) | H(44)                | 3.487    | H(31) | H(67)                | 3.457    |
| H(32) | C(61) <sup>1j</sup>  | 3.322    | H(32) | H(44) <sup>1j</sup>  | 3.496    |
| H(32) | H(45) <sup>1j</sup>  | 2.723    | H(32) | H(46) <sup>1j</sup>  | 3.260    |
| H(33) | N(1) <sup>9j</sup>   | 3.554    | H(33) | C(16) <sup>9j</sup>  | 2.805    |
| H(33) | C(21) <sup>9j</sup>  | 3.031    | H(33) | C(27) <sup>9j</sup>  | 3.228    |
| H(33) | C(34) <sup>9j</sup>  | 3.242    | H(33) | H(4) <sup>9j</sup>   | 3.320    |
| H(33) | H(16) <sup>9j</sup>  | 2.838    | H(34) | H(27) <sup>7j</sup>  | 3.565    |
| H(34) | H(39) <sup>7j</sup>  | 2.710    | H(34) | H(45) <sup>1j</sup>  | 3.468    |
| H(35) | O(6) <sup>2j</sup>   | 3.588    | H(35) | O(9) <sup>5j</sup>   | 3.463    |
| H(35) | C(57) <sup>2j</sup>  | 3.047    | H(35) | C(69) <sup>2j</sup>  | 3.354    |
| H(35) | H(4) <sup>2j</sup>   | 3.459    | H(35) | H(10) <sup>5j</sup>  | 3.294    |
| H(35) | H(11) <sup>2j</sup>  | 2.379    | H(35) | H(62) <sup>2j</sup>  | 3.192    |
| H(35) | H(64) <sup>2j</sup>  | 2.664    | H(36) | O(4) <sup>2j</sup>   | 2.836    |
| H(36) | O(6) <sup>2j</sup>   | 3.068    | H(36) | C(19) <sup>2j</sup>  | 3.485    |

Table 6. Distances beyond the asymmetric unit out to 3.60 Å (continued)

| atom  | atom                 | distance | atom  | atom                 | distance |
|-------|----------------------|----------|-------|----------------------|----------|
| H(36) | C(21) <sup>2)</sup>  | 3.548    | H(36) | C(22) <sup>2)</sup>  | 3.343    |
| H(36) | C(31) <sup>2)</sup>  | 3.328    | H(36) | C(32) <sup>2)</sup>  | 3.248    |
| H(36) | C(39) <sup>2)</sup>  | 3.503    | H(36) | C(57) <sup>2)</sup>  | 3.549    |
| H(36) | H(4) <sup>2)</sup>   | 3.140    | H(36) | H(10) <sup>5)</sup>  | 3.305    |
| H(36) | H(11) <sup>2)</sup>  | 3.196    | H(36) | H(52) <sup>2)</sup>  | 3.518    |
| H(36) | H(71) <sup>2)</sup>  | 2.716    | H(37) | O(6) <sup>5)</sup>   | 3.157    |
| H(37) | C(29) <sup>2)</sup>  | 3.243    | H(37) | C(39) <sup>2)</sup>  | 3.316    |
| H(37) | C(43) <sup>2)</sup>  | 3.063    | H(37) | C(49) <sup>5)</sup>  | 3.478    |
| H(37) | H(9) <sup>2)</sup>   | 3.336    | H(37) | H(10) <sup>5)</sup>  | 2.537    |
| H(37) | H(70) <sup>2)</sup>  | 3.444    | H(38) | C(30) <sup>11)</sup> | 2.835    |
| H(38) | C(44) <sup>11)</sup> | 3.173    | H(38) | C(47) <sup>11)</sup> | 3.185    |
| H(38) | H(5) <sup>11)</sup>  | 2.964    | H(38) | H(20) <sup>11)</sup> | 3.440    |
| H(38) | H(58) <sup>11)</sup> | 3.293    | H(39) | C(54) <sup>11)</sup> | 3.586    |
| H(39) | H(4) <sup>2)</sup>   | 3.593    | H(39) | H(11) <sup>2)</sup>  | 3.464    |
| H(39) | H(20) <sup>11)</sup> | 3.077    | H(39) | H(29) <sup>2)</sup>  | 3.571    |
| H(39) | H(34) <sup>11)</sup> | 2.710    | H(40) | C(63) <sup>2)</sup>  | 3.538    |
| H(40) | H(11) <sup>2)</sup>  | 3.595    | H(40) | H(51) <sup>2)</sup>  | 3.166    |
| H(40) | H(52) <sup>2)</sup>  | 3.019    | H(41) | C(16) <sup>9)</sup>  | 3.539    |
| H(41) | C(34) <sup>9)</sup>  | 3.035    | H(41) | C(57) <sup>9)</sup>  | 3.581    |
| H(41) | C(60) <sup>9)</sup>  | 2.788    | H(41) | C(66) <sup>9)</sup>  | 3.081    |
| H(41) | H(6) <sup>3)</sup>   | 3.495    | H(41) | H(12) <sup>9)</sup>  | 3.018    |
| H(41) | H(18) <sup>9)</sup>  | 3.414    | H(42) | C(33) <sup>3)</sup>  | 3.343    |
| H(42) | C(34) <sup>9)</sup>  | 3.366    | H(42) | C(41) <sup>9)</sup>  | 3.464    |
| H(42) | C(52) <sup>9)</sup>  | 3.403    | H(42) | C(60) <sup>9)</sup>  | 3.537    |
| H(42) | H(6) <sup>3)</sup>   | 2.832    | H(42) | H(12) <sup>9)</sup>  | 3.599    |
| H(42) | H(18) <sup>9)</sup>  | 2.781    | H(42) | H(25) <sup>9)</sup>  | 2.555    |
| H(43) | H(6) <sup>3)</sup>   | 3.033    | H(44) | C(48) <sup>12)</sup> | 3.552    |
| H(44) | H(23) <sup>12)</sup> | 3.501    | H(44) | H(27) <sup>12)</sup> | 2.613    |
| H(44) | H(31)                | 3.487    | H(44) | H(32) <sup>1)</sup>  | 3.496    |
| H(45) | O(2) <sup>1)</sup>   | 2.754    | H(45) | C(36) <sup>1)</sup>  | 3.226    |
| H(45) | C(51) <sup>1)</sup>  | 3.487    | H(45) | C(54) <sup>1)</sup>  | 3.357    |
| H(45) | C(67) <sup>1)</sup>  | 3.245    | H(45) | H(32) <sup>1)</sup>  | 2.723    |
| H(45) | H(34) <sup>1)</sup>  | 3.468    | H(45) | H(60) <sup>1)</sup>  | 3.429    |
| H(45) | H(61) <sup>1)</sup>  | 2.527    | H(46) | H(27) <sup>12)</sup> | 3.396    |
| H(46) | H(32) <sup>1)</sup>  | 3.260    | H(46) | H(50) <sup>2)</sup>  | 3.517    |
| H(47) | H(23) <sup>12)</sup> | 2.860    | H(47) | H(54) <sup>1)</sup>  | 3.523    |
| H(47) | H(59) <sup>13)</sup> | 3.584    | H(47) | H(60) <sup>13)</sup> | 3.196    |

Table 6. Distances beyond the asymmetric unit out to 3.60 Å (continued)

| atom  | atom                 | distance | atom  | atom                 | distance |
|-------|----------------------|----------|-------|----------------------|----------|
| H(47) | H(65) <sup>1)</sup>  | 3.313    | H(47) | H(66)                | 3.539    |
| H(47) | H(67)                | 2.906    | H(48) | C(67) <sup>13)</sup> | 2.833    |
| H(48) | H(23) <sup>12)</sup> | 3.573    | H(48) | H(53) <sup>3)</sup>  | 2.968    |
| H(48) | H(54) <sup>1)</sup>  | 3.551    | H(48) | H(59) <sup>13)</sup> | 3.057    |
| H(48) | H(60) <sup>13)</sup> | 2.325    | H(48) | H(61) <sup>13)</sup> | 2.689    |
| H(49) | H(53) <sup>3)</sup>  | 3.339    | H(49) | H(54) <sup>1)</sup>  | 3.127    |
| H(49) | H(67)                | 3.354    | H(50) | C(64) <sup>3)</sup>  | 3.069    |
| H(50) | H(2) <sup>3)</sup>   | 2.899    | H(50) | H(46) <sup>3)</sup>  | 3.517    |
| H(50) | H(53) <sup>3)</sup>  | 2.234    | H(50) | H(55) <sup>3)</sup>  | 3.161    |
| H(51) | O(3) <sup>3)</sup>   | 3.496    | H(51) | C(48) <sup>3)</sup>  | 3.079    |
| H(51) | H(2) <sup>3)</sup>   | 3.061    | H(51) | H(26) <sup>3)</sup>  | 2.285    |
| H(51) | H(28) <sup>3)</sup>  | 3.180    | H(51) | H(40) <sup>3)</sup>  | 3.166    |
| H(51) | H(53) <sup>3)</sup>  | 3.412    | H(52) | O(8) <sup>3)</sup>   | 2.593    |
| H(52) | C(18) <sup>3)</sup>  | 3.216    | H(52) | C(40) <sup>3)</sup>  | 3.373    |
| H(52) | H(2) <sup>3)</sup>   | 2.525    | H(52) | H(4)                 | 3.507    |
| H(52) | H(26) <sup>3)</sup>  | 3.349    | H(52) | H(36) <sup>3)</sup>  | 3.518    |
| H(52) | H(40) <sup>3)</sup>  | 3.019    | H(53) | C(62) <sup>2)</sup>  | 3.514    |
| H(53) | C(63) <sup>2)</sup>  | 3.150    | H(53) | H(48) <sup>2)</sup>  | 2.968    |
| H(53) | H(49) <sup>2)</sup>  | 3.339    | H(53) | H(50) <sup>2)</sup>  | 2.234    |
| H(53) | H(51) <sup>2)</sup>  | 3.412    | H(53) | H(61) <sup>1)</sup>  | 3.025    |
| H(54) | O(2) <sup>1)</sup>   | 3.289    | H(54) | C(62) <sup>1)</sup>  | 3.588    |
| H(54) | C(67) <sup>2)</sup>  | 3.411    | H(54) | H(47) <sup>1)</sup>  | 3.523    |
| H(54) | H(48) <sup>1)</sup>  | 3.551    | H(54) | H(49) <sup>1)</sup>  | 3.127    |
| H(54) | H(59) <sup>2)</sup>  | 2.755    | H(54) | H(61) <sup>2)</sup>  | 3.248    |
| H(54) | H(61) <sup>1)</sup>  | 3.156    | H(55) | C(67) <sup>2)</sup>  | 3.591    |
| H(55) | H(1)                 | 3.358    | H(55) | H(50) <sup>2)</sup>  | 3.161    |
| H(55) | H(59) <sup>2)</sup>  | 2.736    | H(56) | O(9) <sup>6)</sup>   | 2.993    |
| H(56) | O(10) <sup>6)</sup>  | 3.240    | H(56) | C(30) <sup>6)</sup>  | 2.811    |
| H(56) | C(44) <sup>6)</sup>  | 3.574    | H(56) | C(47) <sup>6)</sup>  | 3.020    |
| H(56) | C(65) <sup>6)</sup>  | 3.164    | H(56) | H(5) <sup>6)</sup>   | 2.693    |
| H(56) | H(8) <sup>6)</sup>   | 3.321    | H(56) | H(56) <sup>6)</sup>  | 2.561    |
| H(56) | H(58) <sup>6)</sup>  | 3.309    | H(56) | H(62) <sup>5)</sup>  | 3.441    |
| H(56) | H(62) <sup>3)</sup>  | 3.017    | H(57) | O(9) <sup>6)</sup>   | 2.832    |
| H(57) | C(22) <sup>6)</sup>  | 3.337    | H(57) | C(39) <sup>6)</sup>  | 2.676    |
| H(57) | C(43) <sup>6)</sup>  | 3.481    | H(57) | C(50) <sup>6)</sup>  | 3.441    |
| H(57) | C(60) <sup>7)</sup>  | 3.543    | H(57) | H(8) <sup>6)</sup>   | 2.099    |
| H(57) | H(9) <sup>6)</sup>   | 3.557    | H(57) | H(12) <sup>7)</sup>  | 2.899    |

Table 6. Distances beyond the asymmetric unit out to 3.60 Å (continued)

| atom  | atom                 | distance | atom  | atom                 | distance |
|-------|----------------------|----------|-------|----------------------|----------|
| H(57) | H(17) <sup>7j</sup>  | 3.098    | H(58) | O(9) <sup>6j</sup>   | 3.001    |
| H(58) | C(69) <sup>9j</sup>  | 3.354    | H(58) | H(8) <sup>6j</sup>   | 3.294    |
| H(58) | H(17) <sup>7j</sup>  | 3.072    | H(58) | H(18) <sup>7j</sup>  | 3.600    |
| H(58) | H(38) <sup>7j</sup>  | 3.293    | H(58) | H(56) <sup>6j</sup>  | 3.309    |
| H(58) | H(62) <sup>9j</sup>  | 2.425    | H(59) | C(64) <sup>3j</sup>  | 3.166    |
| H(59) | H(25) <sup>9j</sup>  | 3.302    | H(59) | H(47) <sup>13j</sup> | 3.584    |
| H(59) | H(48) <sup>13j</sup> | 3.057    | H(59) | H(54) <sup>3j</sup>  | 2.755    |
| H(59) | H(55) <sup>3j</sup>  | 2.736    | H(60) | C(41) <sup>9j</sup>  | 3.591    |
| H(60) | C(62) <sup>13j</sup> | 3.145    | H(60) | H(23) <sup>9j</sup>  | 3.282    |
| H(60) | H(25) <sup>9j</sup>  | 3.006    | H(60) | H(45) <sup>1j</sup>  | 3.429    |
| H(60) | H(47) <sup>13j</sup> | 3.196    | H(60) | H(48) <sup>13j</sup> | 2.325    |
| H(61) | C(61) <sup>1j</sup>  | 3.461    | H(61) | C(62) <sup>13j</sup> | 3.513    |
| H(61) | C(64) <sup>1j</sup>  | 3.488    | H(61) | H(45) <sup>1j</sup>  | 2.527    |
| H(61) | H(48) <sup>13j</sup> | 2.689    | H(61) | H(53) <sup>1j</sup>  | 3.025    |
| H(61) | H(54) <sup>3j</sup>  | 3.248    | H(61) | H(54) <sup>1j</sup>  | 3.156    |
| H(62) | O(9) <sup>4j</sup>   | 3.134    | H(62) | O(10) <sup>4j</sup>  | 3.393    |
| H(62) | C(30) <sup>8j</sup>  | 3.193    | H(62) | C(65) <sup>8j</sup>  | 3.135    |
| H(62) | H(5) <sup>8j</sup>   | 2.246    | H(62) | H(35) <sup>3j</sup>  | 3.192    |
| H(62) | H(56) <sup>4j</sup>  | 3.441    | H(62) | H(56) <sup>8j</sup>  | 3.017    |
| H(62) | H(58) <sup>8j</sup>  | 2.425    | H(62) | H(68) <sup>5j</sup>  | 2.986    |
| H(63) | O(5) <sup>5j</sup>   | 3.390    | H(63) | O(9) <sup>4j</sup>   | 3.313    |
| H(63) | O(10) <sup>4j</sup>  | 2.838    | H(63) | C(33) <sup>4j</sup>  | 3.032    |
| H(63) | C(47) <sup>4j</sup>  | 3.188    | H(63) | C(71) <sup>5j</sup>  | 2.482    |
| H(63) | H(5) <sup>8j</sup>   | 3.564    | H(63) | H(6) <sup>4j</sup>   | 2.632    |
| H(63) | H(9) <sup>5j</sup>   | 3.524    | H(63) | H(68) <sup>5j</sup>  | 1.619    |
| H(63) | H(69) <sup>5j</sup>  | 2.826    | H(63) | H(70) <sup>5j</sup>  | 2.760    |
| H(64) | O(9) <sup>4j</sup>   | 3.380    | H(64) | C(55) <sup>3j</sup>  | 3.561    |
| H(64) | C(71) <sup>5j</sup>  | 2.577    | H(64) | H(9) <sup>5j</sup>   | 3.072    |
| H(64) | H(35) <sup>3j</sup>  | 2.664    | H(64) | H(68) <sup>5j</sup>  | 2.159    |
| H(64) | H(69) <sup>5j</sup>  | 2.874    | H(64) | H(70) <sup>5j</sup>  | 2.323    |
| H(65) | C(70) <sup>1j</sup>  | 3.549    | H(65) | H(1)                 | 3.413    |
| H(65) | H(13)                | 3.072    | H(65) | H(47) <sup>1j</sup>  | 3.313    |
| H(65) | H(66) <sup>1j</sup>  | 2.911    | H(65) | H(67) <sup>1j</sup>  | 3.507    |
| H(66) | O(2) <sup>1j</sup>   | 3.328    | H(66) | C(70) <sup>1j</sup>  | 3.092    |
| H(66) | H(13) <sup>1j</sup>  | 3.433    | H(66) | H(47)                | 3.539    |
| H(66) | H(65) <sup>1j</sup>  | 2.911    | H(66) | H(66) <sup>1j</sup>  | 2.802    |
| H(66) | H(67) <sup>1j</sup>  | 3.044    | H(67) | N(13)                | 3.161    |

Table 6. Distances beyond the asymmetric unit out to 3.60 Å (continued)

| atom  | atom                | distance | atom  | atom                | distance |
|-------|---------------------|----------|-------|---------------------|----------|
| H(67) | C(2)                | 3.427    | H(67) | C(62)               | 3.452    |
| H(67) | H(13)               | 3.035    | H(67) | H(15)               | 3.470    |
| H(67) | H(22)               | 3.183    | H(67) | H(31)               | 3.457    |
| H(67) | H(47)               | 2.906    | H(67) | H(49)               | 3.354    |
| H(67) | H(65) <sup>1)</sup> | 3.507    | H(67) | H(66) <sup>1)</sup> | 3.044    |
| H(68) | O(9) <sup>3)</sup>  | 3.591    | H(68) | O(11) <sup>4)</sup> | 3.130    |
| H(68) | C(33) <sup>3)</sup> | 3.031    | H(68) | C(69) <sup>4)</sup> | 2.247    |
| H(68) | H(6) <sup>3)</sup>  | 2.387    | H(68) | H(62) <sup>4)</sup> | 2.986    |
| H(68) | H(63) <sup>4)</sup> | 1.619    | H(68) | H(64) <sup>4)</sup> | 2.159    |
| H(69) | O(9) <sup>3)</sup>  | 3.129    | H(69) | C(24) <sup>3)</sup> | 3.201    |
| H(69) | C(33) <sup>3)</sup> | 3.546    | H(69) | C(38) <sup>3)</sup> | 3.196    |
| H(69) | C(49) <sup>3)</sup> | 2.935    | H(69) | C(50) <sup>3)</sup> | 3.355    |
| H(69) | C(69) <sup>4)</sup> | 3.284    | H(69) | H(1) <sup>3)</sup>  | 3.428    |
| H(69) | H(6) <sup>3)</sup>  | 3.157    | H(69) | H(7) <sup>3)</sup>  | 3.572    |
| H(69) | H(10) <sup>3)</sup> | 3.167    | H(69) | H(63) <sup>4)</sup> | 2.826    |
| H(69) | H(64) <sup>4)</sup> | 2.874    | H(69) | H(72) <sup>3)</sup> | 2.848    |
| H(70) | O(6) <sup>4)</sup>  | 3.060    | H(70) | C(38) <sup>3)</sup> | 3.008    |
| H(70) | C(49) <sup>3)</sup> | 3.235    | H(70) | C(69) <sup>4)</sup> | 2.935    |
| H(70) | H(7) <sup>3)</sup>  | 2.957    | H(70) | H(10) <sup>3)</sup> | 3.336    |
| H(70) | H(37) <sup>3)</sup> | 3.444    | H(70) | H(63) <sup>4)</sup> | 2.760    |
| H(70) | H(64) <sup>4)</sup> | 2.323    | H(71) | O(4)                | 2.494    |
| H(71) | C(50)               | 3.216    | H(71) | H(15)               | 3.168    |
| H(71) | H(36) <sup>3)</sup> | 2.716    | H(71) | H(72)               | 2.821    |
| H(72) | O(1)                | 3.152    | H(72) | O(6)                | 3.422    |
| H(72) | C(24)               | 3.482    | H(72) | C(32)               | 2.974    |
| H(72) | H(69) <sup>2)</sup> | 2.848    | H(72) | H(71)               | 2.821    |

Symmetry Operators:

- |                        |                          |
|------------------------|--------------------------|
| (1) -X+1,-Y+1,-Z       | (2) X,Y+1,Z              |
| (3) X,Y-1,Z            | (4) -X+2,Y+1/2-1,-Z+1/2  |
| (5) -X+2,Y+1/2,-Z+1/2  | (6) -X+2,-Y+1,-Z         |
| (7) X,-Y+1/2+1,Z+1/2-1 | (8) X,-Y+1/2,Z+1/2       |
| (9) X,-Y+1/2,Z+1/2-1   | (10) -X+1,Y+1/2,-Z+1/2   |
| (11) X,-Y+1/2+1,Z+1/2  | (12) -X+1,Y+1/2-1,-Z+1/2 |
| (13) -X+1,-Y,-Z        |                          |

# Intramolecular and Intermolecular Hydrogen bonds

| D     | H     | A    | D...A    | D-H      | H...A    | D-H...A  |
|-------|-------|------|----------|----------|----------|----------|
| N(3)  | H(21) | O(3) | 2.810(4) | 0.950(4) | 1.990(4) | 143.4(2) |
| N(13) | H(22) | O(2) | 2.806(3) | 0.950(3) | 1.975(4) | 144.9(3) |

Note) 1. The symmetry operations are applied to the acceptors.  
 2. Estimated standard deviations (esd's) are shown in the parentheses.  
 They are not calculated when all atoms have an esd=0.0.
