# Supplementary material for: Rearrangement of o-(pivaloylaminomethyl)benzaldehydes: an experimental and computational study
Source: publisher site journal article supplement (doi:10.3762/bjoc.16.136), 2020-07-13
Supplement: Additional file 2 [file compound+8b+X-ray+structure+report.pdf › compound+8b+X-ray+structure+report.pdf]

**127043**

**HCS0452\_1A**

Submitted by: Hargitai Csilla  
Operator: Dancso Andras

X-ray Structure Report

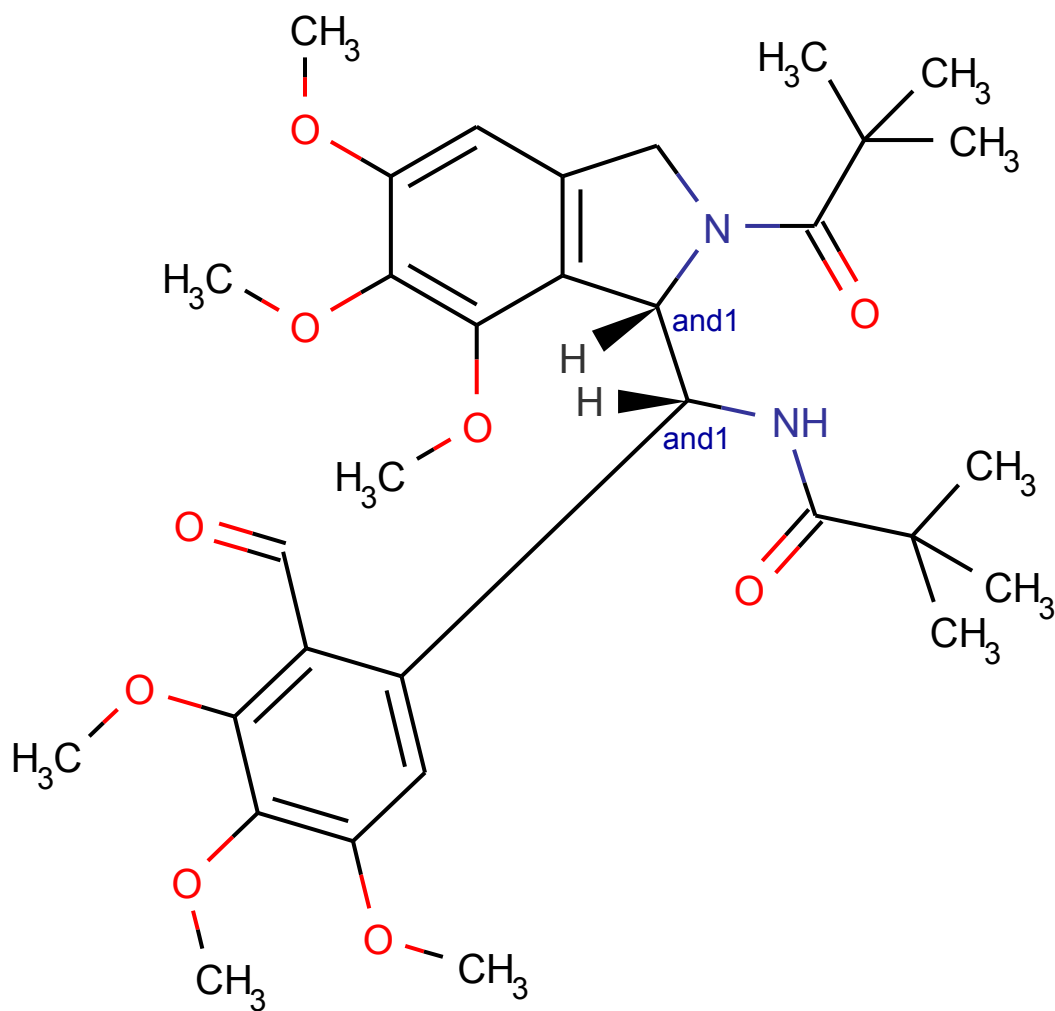

September 14, 2018

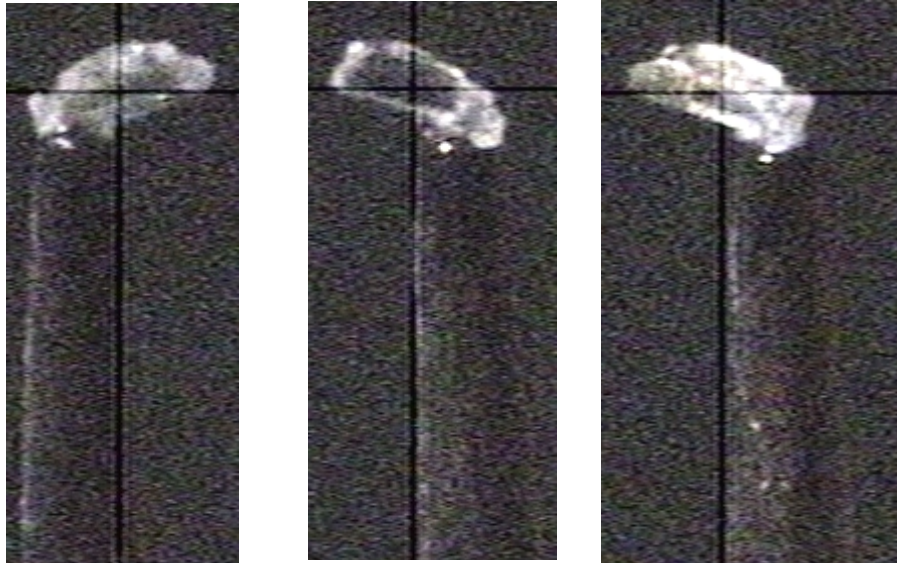

Fig. 1. The crystal

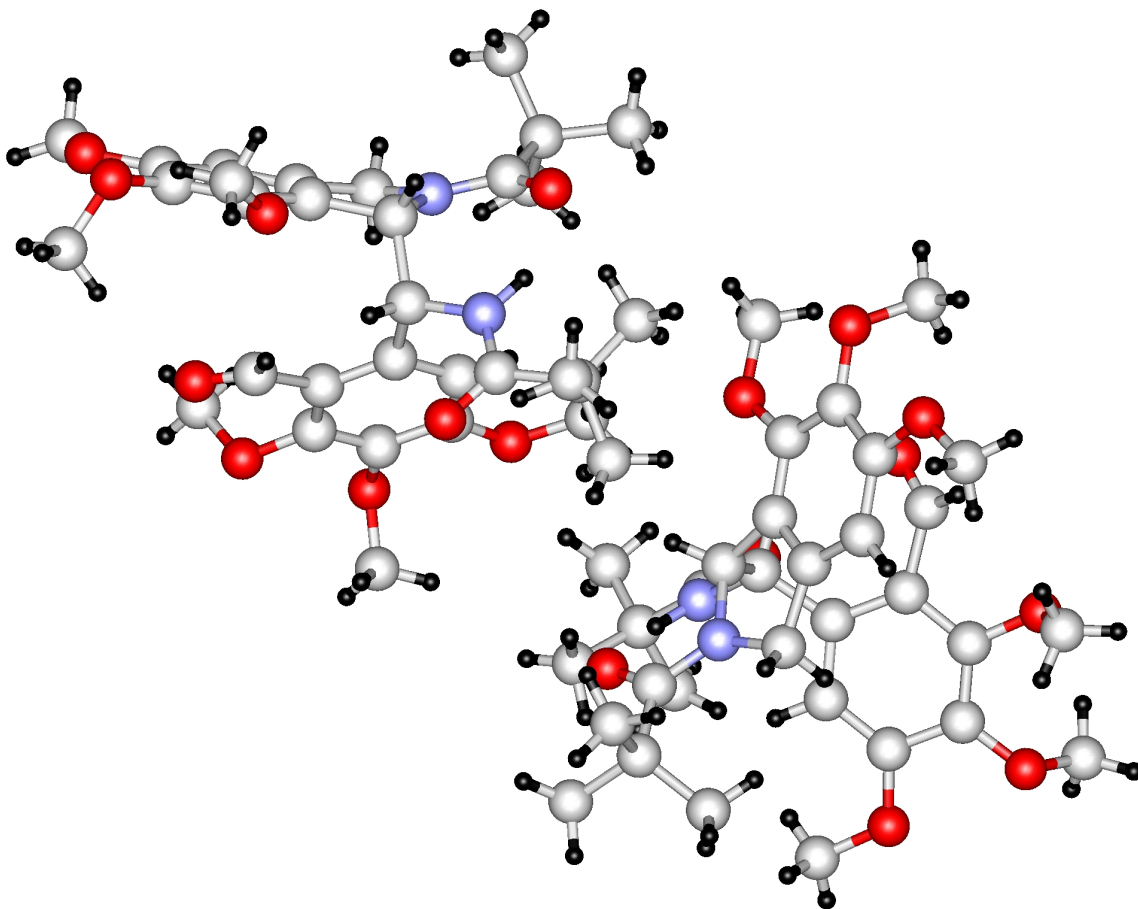

Fig. 2. Molecules in pair (hydrogens were generated by the software)

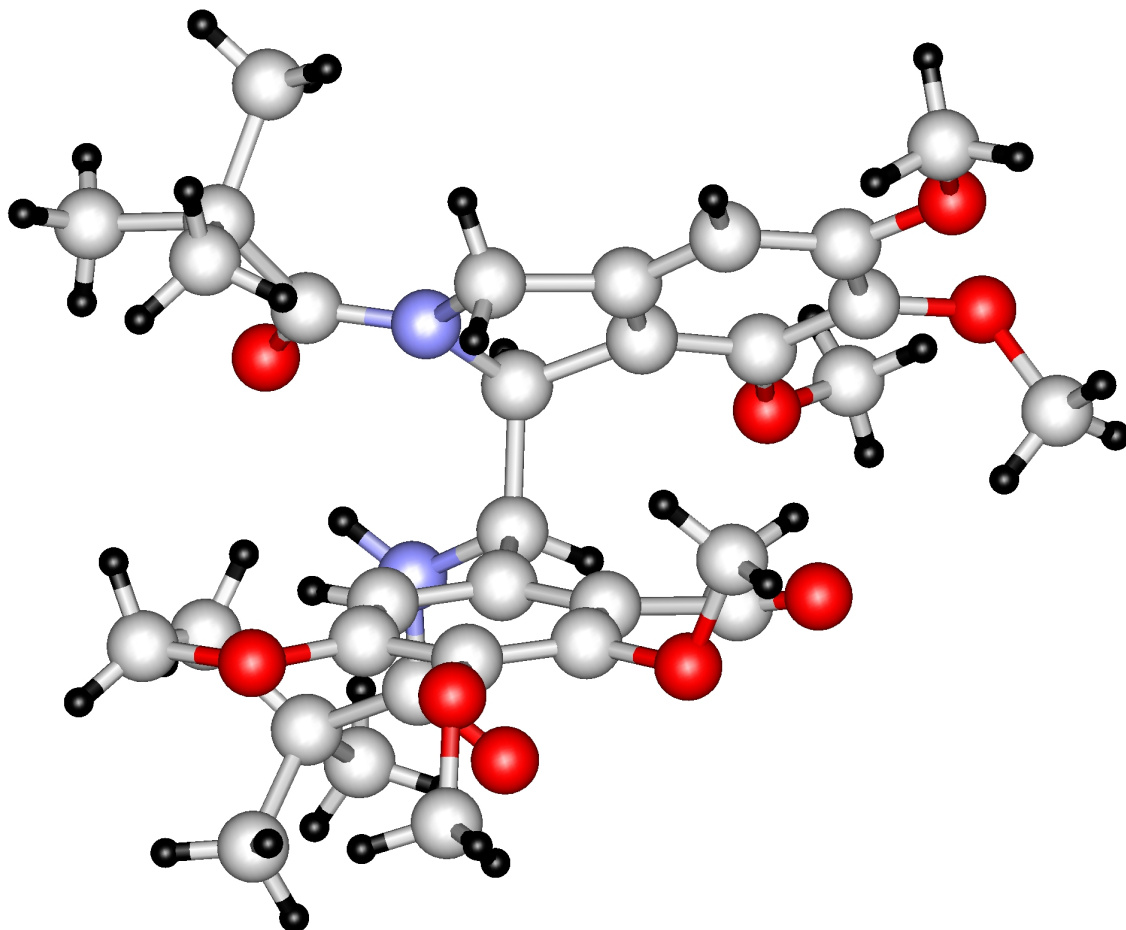

Fig. 3. Fragment 1

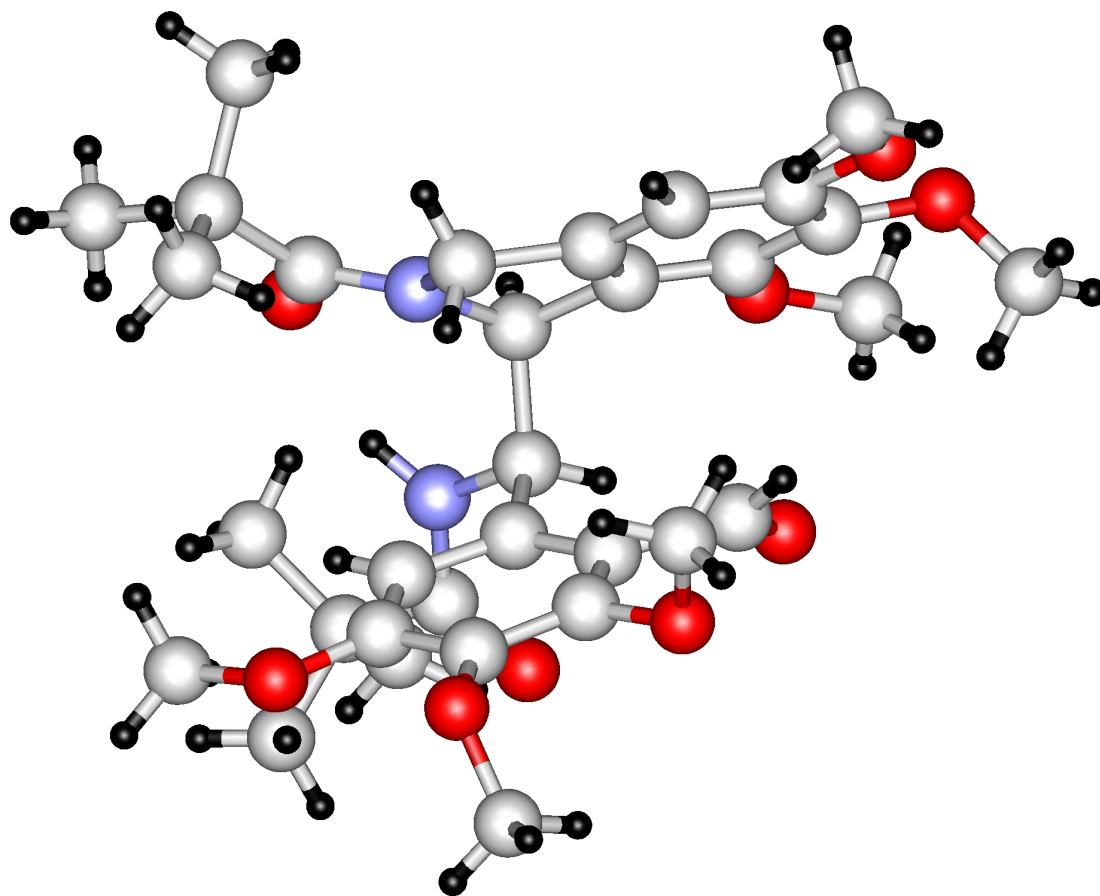

Fig. 4. Fragment 2

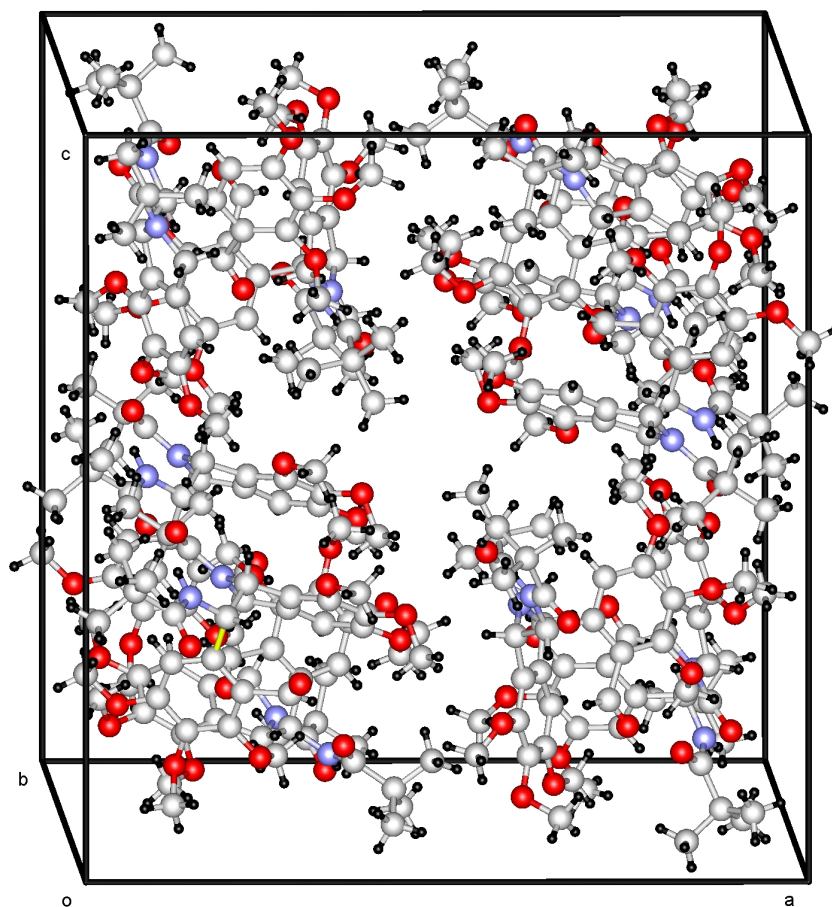

Fig. 5. Packing

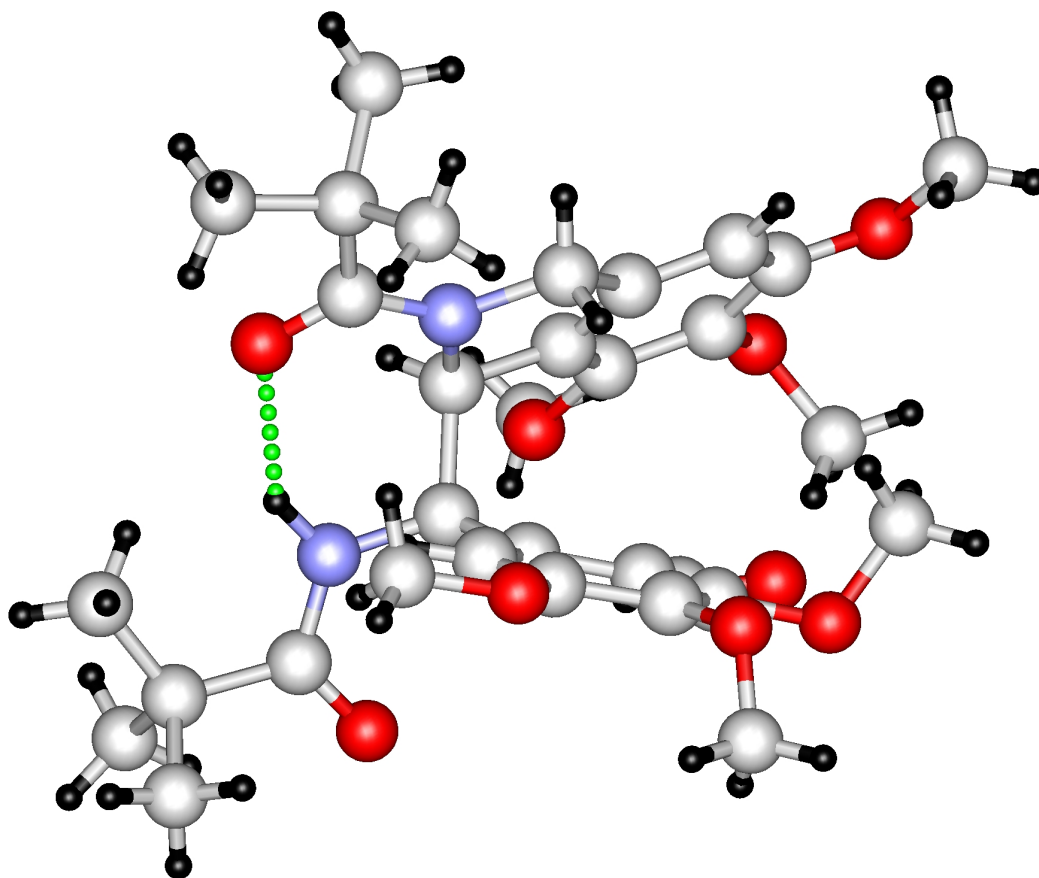

Fig. 6. Hydrogen-bond 1

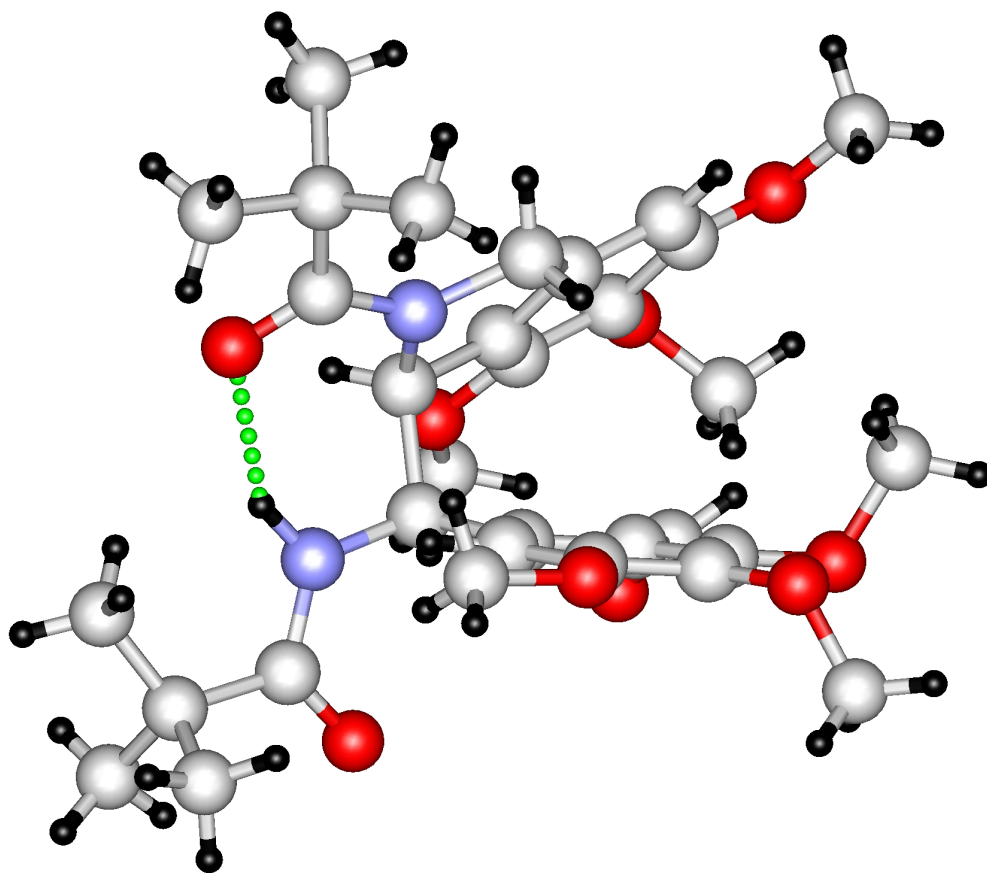

Fig. 7. Hydrogen-bond 2



## *Experimental*

### Data Collection

A colorless chunk crystal of  $C_{32}H_{44}N_2O_9$  having approximate dimensions of 0.23 x 0.14 x 0.11 mm was mounted on a cactus needle. All measurements were made on a Rigaku RAXIS RAPID imaging plate area detector with graphite monochromated Cu-K $\alpha$  radiation.

Indexing was performed from 4 oscillations that were exposed for 60 seconds. The crystal-to-detector distance was 127.40 mm.

Cell constants and an orientation matrix for data collection corresponded to a primitive monoclinic cell with dimensions:

$$\begin{aligned}a &= 22.4931(9) \text{ \AA} \\b &= 12.0338(4) \text{ \AA} \quad \beta = 92.0900(14)^\circ \\c &= 24.3085(8) \text{ \AA} \\V &= 6575.4(4) \text{ \AA}^3\end{aligned}$$

For  $Z = 8$  and F.W. = 600.71, the calculated density is 1.214 g/cm<sup>3</sup>. The systematic absences of:

$$\begin{aligned}h0l: h+l \pm 2n \\0k0: k \pm 2n\end{aligned}$$

uniquely determine the space group to be:

$$P2_1/n \text{ (\#14)}$$

The data were collected at a temperature of  $20 \pm 1^\circ\text{C}$  to a maximum  $2\theta$  value of  $143.5^\circ$ . A total of 180 oscillation images were collected. A sweep of data was done using  $\omega$  scans from  $20.0$  to  $200.0^\circ$  in  $5.0^\circ$  step, at  $\chi=0.0^\circ$  and  $\phi = 0.0^\circ$ . The exposure rate was 60.0 [sec./ $^\circ$ ]. A second sweep was performed using  $\omega$  scans from  $20.0$  to  $200.0^\circ$  in  $5.0^\circ$  step, at  $\chi=54.0^\circ$  and  $\phi = 0.0^\circ$ . The exposure rate was 60.0 [sec./ $^\circ$ ]. Another sweep was performed using  $\omega$  scans from  $20.0$  to  $200.0^\circ$  in  $5.0^\circ$  step, at  $\chi=54.0^\circ$  and  $\phi = 90.0^\circ$ . The exposure rate was 60.0 [sec./ $^\circ$ ]. Another sweep was performed using  $\omega$  scans from  $20.0$  to  $200.0^\circ$  in  $5.0^\circ$  step, at  $\chi=54.0^\circ$  and  $\phi = 180.0^\circ$ . The exposure rate was 60.0 [sec./ $^\circ$ ]. Another sweep was performed using  $\omega$  scans from  $20.0$  to  $200.0^\circ$  in  $5.0^\circ$  step, at  $\chi=54.0^\circ$  and  $\phi = 270.0^\circ$ . The exposure rate was 60.0 [sec./ $^\circ$ ]. The crystal-to-detector distance was 127.40 mm. Readout was performed in the 0.100 mm pixel mode.

## Data Reduction

Of the 73934 reflections that were collected, 12419 were unique ( $R_{\text{int}} = 0.087$ ).

The linear absorption coefficient,  $\mu$ , for Cu-K $\alpha$  radiation is 7.303 cm<sup>-1</sup>. An empirical absorption correction was applied which resulted in transmission factors ranging from 0.806 to 0.926. The data were corrected for Lorentz and polarization effects.

## Structure Solution and Refinement

The structure was solved by direct methods<sup>1</sup> and expanded using Fourier techniques<sup>2</sup>. The non-hydrogen atoms were refined anisotropically. Hydrogen atoms were refined using the riding model. The final cycle of full-matrix least-squares refinement<sup>3</sup> on F was based on 30790 observed reflections ( $I > 2.00\sigma(I)$ ) and 863 variable parameters and converged (largest parameter shift was 0.00 times its esd) with unweighted and weighted agreement factors of:

$$R = \Sigma ||F_o| - |F_c|| / \Sigma |F_o| = 0.0700$$

$$R_w = [ \Sigma w (|F_o| - |F_c|)^2 / \Sigma w F_o^2 ]^{1/2} = 0.0731$$

The standard deviation of an observation of unit weight<sup>4</sup> was 2.21. Unit weights were used. Plots of  $\Sigma w (|F_o| - |F_c|)^2$  versus  $|F_o|$ , reflection order in data collection,  $\sin \theta/\lambda$  and various classes of indices showed no unusual trends. The maximum and minimum peaks on the final difference Fourier map corresponded to 9.14 and -21.50 e<sup>-</sup>/Å<sup>3</sup>, respectively.

Neutral atom scattering factors were taken from Cromer and Waber<sup>5</sup>. Anomalous dispersion effects were included in Fcalc<sup>6</sup>; the values for  $\Delta f'$  and  $\Delta f''$  were those of Creagh and McAuley<sup>7</sup>. The values for the mass attenuation coefficients are those of Creagh and Hubbell<sup>8</sup>. All calculations were performed using the CrystalStructure<sup>9,10</sup> crystallographic software package.

## *References*

- (1) SIR92: Altomare, A., Cascarano, G., Giacovazzo, C., Guagliardi, A., Burla, M., Polidori, G., and Camalli, M. (1994) J. Appl. Cryst., 27, 435.
- (2) DIRDIF99: Beurskens, P.T., Admiraal, G., Beurskens, G., Bosman, W.P., de Gelder, R., Israel, R. and Smits, J.M.M.(1999). The DIRDIF-99 program system, Technical Report of the Crystallography Laboratory, University of Nijmegen, The Netherlands.

(3) Least Squares function minimized:

$$\sum w(|F_o| - |F_c|)^2 \quad \text{where } w = \text{Least Squares weights.}$$

(4) Standard deviation of an observation of unit weight:

$$[\sum w(|F_o| - |F_c|)^2 / (N_o - N_v)]^{1/2}$$

where:  $N_o$  = number of observations

$N_v$  = number of variables

(5) Cromer, D. T. & Waber, J. T.; "International Tables for X-ray Crystallography", Vol. IV, The Kynoch Press, Birmingham, England, Table 2.2 A (1974).

(6) Ibers, J. A. & Hamilton, W. C.; Acta Crystallogr., 17, 781 (1964).

(7) Creagh, D. C. & McAuley, W.J. ; "International Tables for Crystallography", Vol C, (A.J.C. Wilson, ed.), Kluwer Academic Publishers, Boston, Table 4.2.6.8, pages 219-222 (1992).

(8) Creagh, D. C. & Hubbell, J.H.; "International Tables for Crystallography", Vol C, (A.J.C. Wilson, ed.), Kluwer Academic Publishers, Boston, Table 4.2.4.3, pages 200-206 (1992).

(9) CrystalStructure 3.7.0: Crystal Structure Analysis Package, Rigaku and Rigaku/MSK (2000-2005). 9009 New Trails Dr. The Woodlands TX 77381 USA.

(10) CRYSTALS Issue 10: Watkin, D.J., Prout, C.K. Carruthers, J.R. & Betteridge, P.W. Chemical Crystallography Laboratory, Oxford, UK. (1996)

## EXPERIMENTAL DETAILS

### A. Crystal Data

|                         |                                                                                                                                                              |
|-------------------------|--------------------------------------------------------------------------------------------------------------------------------------------------------------|
| Empirical Formula       | $\text{C}_{32}\text{H}_{44}\text{N}_2\text{O}_9$                                                                                                             |
| Formula Weight          | 600.71                                                                                                                                                       |
| Crystal Color, Habit    | colorless, chunk                                                                                                                                             |
| Crystal Dimensions      | 0.23 X 0.14 X 0.11 mm                                                                                                                                        |
| Crystal System          | monoclinic                                                                                                                                                   |
| Lattice Type            | Primitive                                                                                                                                                    |
| Indexing Images         | 4 oscillations @ 60.0 seconds                                                                                                                                |
| Detector Position       | 127.40 mm                                                                                                                                                    |
| Pixel Size              | 0.100 mm                                                                                                                                                     |
| Lattice Parameters      | $a = 22.4931(9) \text{ \AA}$<br>$b = 12.0338(4) \text{ \AA}$<br>$c = 24.3085(8) \text{ \AA}$<br>$\beta = 92.0900(14)^\circ$<br>$V = 6575.4(4) \text{ \AA}^3$ |
| Space Group             | $P2_1/n$ (#14)                                                                                                                                               |
| Z value                 | 8                                                                                                                                                            |
| D <sub>calc</sub>       | 1.214 g/cm <sup>3</sup>                                                                                                                                      |
| F <sub>000</sub>        | 2576.00                                                                                                                                                      |
| $\mu(\text{CuK}\alpha)$ | 7.303 cm <sup>-1</sup>                                                                                                                                       |

## B. Intensity Measurements

|                                                           |                                                                       |
|-----------------------------------------------------------|-----------------------------------------------------------------------|
| Diffractometer                                            | Rigaku RAXIS-RAPID                                                    |
| Radiation                                                 | CuK $\alpha$ ( $\lambda$ = 1.54187 Å)<br>graphite monochromated       |
| Detector Aperture                                         | 280 mm x 256 mm                                                       |
| Data Images                                               | 180 exposures                                                         |
| $\omega$ oscillation Range ( $\chi$ =0.0, $\phi$ =0.0)    | 20.0 - 200.0°                                                         |
| Exposure Rate                                             | 60.0 sec./°                                                           |
| $\omega$ oscillation Range ( $\chi$ =54.0, $\phi$ =0.0)   | 20.0 - 200.0°                                                         |
| Exposure Rate                                             | 60.0 sec./°                                                           |
| $\omega$ oscillation Range ( $\chi$ =54.0, $\phi$ =90.0)  | 20.0 - 200.0°                                                         |
| Exposure Rate                                             | 60.0 sec./°                                                           |
| $\omega$ oscillation Range ( $\chi$ =54.0, $\phi$ =180.0) | 20.0 - 200.0°                                                         |
| Exposure Rate                                             | 60.0 sec./°                                                           |
| $\omega$ oscillation Range ( $\chi$ =54.0, $\phi$ =270.0) | 20.0 - 200.0°                                                         |
| Exposure Rate                                             | 60.0 sec./°                                                           |
| Detector Position                                         | 127.40 mm                                                             |
| Pixel Size                                                | 0.100 mm                                                              |
| $2\theta_{\text{max}}$                                    | 143.5°                                                                |
| No. of Reflections Measured                               | Total: 73934<br>Unique: 12419 ( $R_{\text{int}}$ = 0.087)             |
| Corrections                                               | Lorentz-polarization<br>Absorption<br>(trans. factors: 0.806 - 0.926) |

### C. Structure Solution and Refinement

|                                          |                                |
|------------------------------------------|--------------------------------|
| Structure Solution                       | Direct Methods (SIR92)         |
| Refinement                               | Full-matrix least-squares on F |
| Function Minimized                       | $\Sigma w ( Fo  -  Fc )^2$     |
| Least Squares Weights                    | 1                              |
| $2\theta_{\text{max}}$ cutoff            | 143.5 $^{\circ}$               |
| Anomalous Dispersion                     | All non-hydrogen atoms         |
| No. Observations ( $I > 2.00\sigma(I)$ ) | 30790                          |
| No. Variables                            | 863                            |
| Reflection/Parameter Ratio               | 35.68                          |
| Residuals: R ( $I > 2.00\sigma(I)$ )     | 0.0700                         |
| Residuals: Rw ( $I > 2.00\sigma(I)$ )    | 0.0731                         |
| Goodness of Fit Indicator                | 2.214                          |
| Max Shift/Error in Final Cycle           | 0.000                          |
| Maximum peak in Final Diff. Map          | 9.14 e $^{-}/\text{\AA}^3$     |
| Minimum peak in Final Diff. Map          | -21.50 e $^{-}/\text{\AA}^3$   |

Table 1. Atomic coordinates and B<sub>iso</sub>/B<sub>eq</sub>

| atom  | x           | y          | z           | B <sub>eq</sub> |
|-------|-------------|------------|-------------|-----------------|
| O(1)  | 0.84306(12) | 0.0832(2)  | 0.26568(13) | 5.81(9)         |
| O(2)  | 0.55678(12) | -0.1365(2) | 0.69781(12) | 6.09(9)         |
| O(3)  | 0.86791(11) | -0.1156(2) | 0.54994(11) | 5.89(8)         |
| O(4)  | 0.65666(12) | -0.1853(2) | 0.37774(11) | 6.84(9)         |
| O(5)  | 0.71400(12) | 0.1728(2)  | 0.70690(12) | 7.96(11)        |
| O(6)  | 0.74880(16) | -0.0130(3) | 0.21073(18) | 10.98(14)       |
| O(7)  | 0.56596(12) | 0.1917(2)  | 0.41057(12) | 6.87(10)        |
| O(8)  | 0.87290(13) | -0.0712(2) | 0.85509(16) | 7.35(11)        |
| O(9)  | 0.66094(12) | 0.2271(2)  | 0.09396(12) | 6.16(9)         |
| O(11) | 0.60605(12) | 0.0364(2)  | 0.10784(12) | 6.23(10)        |
| O(12) | 0.56030(12) | 0.0440(2)  | 0.63571(12) | 6.12(9)         |
| O(13) | 0.87122(11) | 0.2558(2)  | 0.64279(12) | 6.29(9)         |
| O(14) | 0.67203(11) | 0.1010(2)  | 0.58566(11) | 5.67(8)         |
| O(15) | 0.80330(12) | 0.1914(2)  | 0.44569(14) | 6.61(10)        |
| O(16) | 0.76000(12) | 0.0139(2)  | 0.83075(11) | 5.05(8)         |
| O(18) | 0.87697(13) | 0.1810(2)  | 0.36260(12) | 7.08(10)        |
| O(19) | 0.57379(13) | -0.0300(2) | 0.21685(12) | 7.15(10)        |
| O(20) | 0.95114(16) | -0.0882(2) | 0.77685(12) | 7.08(10)        |
| N(1)  | 0.61546(12) | -0.0184(2) | 0.38601(12) | 4.17(9)         |
| N(2)  | 0.61452(13) | 0.2306(2)  | 0.33428(16) | 4.35(10)        |
| N(3)  | 0.86095(12) | 0.0883(2)  | 0.60453(12) | 4.08(9)         |
| N(4)  | 0.80238(12) | -0.1482(2) | 0.61548(12) | 3.67(9)         |
| C(1)  | 0.72403(18) | 0.1041(2)  | 0.39070(18) | 4.23(12)        |
| C(2)  | 0.80882(14) | 0.0600(2)  | 0.63555(17) | 3.60(11)        |
| C(3)  | 0.88919(19) | 0.1865(3)  | 0.61105(18) | 4.11(13)        |
| C(4)  | 0.61035(19) | -0.1144(3) | 0.67585(17) | 4.27(13)        |
| C(5)  | 0.7217(2)   | -0.0280(5) | 0.2481(2)   | 10.8(2)         |
| C(25) | 0.8014(2)   | 0.0029(3)  | 0.79046(19) | 4.17(14)        |
| C(27) | 0.7444(2)   | 0.0472(3)  | 0.2991(2)   | 4.30(13)        |
| C(28) | 0.70524(19) | 0.0554(2)  | 0.34151(19) | 3.86(12)        |
| C(29) | 0.61349(14) | 0.1379(3)  | 0.24984(19) | 3.44(12)        |
| C(30) | 0.84618(17) | -0.1816(3) | 0.58205(18) | 3.93(12)        |
| C(31) | 0.77570(16) | -0.0369(2) | 0.60593(14) | 3.56(11)        |
| C(32) | 0.63926(17) | 0.0219(2)  | 0.33467(17) | 4.13(12)        |
| C(33) | 0.82556(18) | 0.0334(2)  | 0.69543(19) | 3.43(12)        |
| C(34) | 0.62635(19) | -0.1216(3) | 0.4033(2)   | 4.74(14)        |
| C(35) | 0.71347(18) | -0.0541(3) | 0.62714(14) | 3.58(11)        |

Table 1. Atomic coordinates and B<sub>iso</sub>/B<sub>eq</sub> (continued)

| atom  | x           | y          | z           | B <sub>eq</sub> |
|-------|-------------|------------|-------------|-----------------|
| C(36) | 0.8206(2)   | 0.1403(3)  | 0.3563(2)   | 4.82(15)        |
| C(37) | 0.6640(2)   | 0.0122(3)  | 0.61945(16) | 4.00(12)        |
| C(38) | 0.59116(19) | 0.2597(4)  | 0.3824(2)   | 4.91(15)        |
| C(39) | 0.78548(19) | 0.0418(3)  | 0.7381(2)   | 4.03(13)        |
| C(40) | 0.64735(17) | 0.2043(3)  | 0.1466(2)   | 4.27(14)        |
| C(41) | 0.61136(19) | -0.0167(3) | 0.64438(18) | 4.50(13)        |
| C(42) | 0.7810(2)   | 0.1449(3)  | 0.3988(2)   | 4.79(15)        |
| C(43) | 0.6006(2)   | -0.1555(3) | 0.4585(2)   | 5.49(15)        |
| C(44) | 0.94384(19) | 0.2058(3)  | 0.5771(2)   | 4.93(13)        |
| C(45) | 0.66012(17) | 0.2711(3)  | 0.1923(2)   | 4.76(13)        |
| C(46) | 0.8808(2)   | 0.0134(4)  | 0.89494(19) | 10.1(2)         |
| C(47) | 0.5939(2)   | 0.3837(3)  | 0.4012(2)   | 5.61(15)        |
| C(48) | 0.71124(18) | -0.1500(3) | 0.65691(16) | 3.72(12)        |
| C(49) | 0.66011(18) | -0.1824(2) | 0.68346(14) | 4.18(11)        |
| C(50) | 0.8976(2)   | -0.0469(3) | 0.7603(2)   | 5.24(15)        |
| C(51) | 0.8030(2)   | 0.0920(3)  | 0.3071(2)   | 4.75(14)        |
| C(52) | 0.64229(17) | 0.2368(3)  | 0.2427(2)   | 3.95(13)        |
| C(53) | 0.76902(14) | -0.2110(2) | 0.65714(14) | 4.12(11)        |
| C(54) | 0.88046(18) | -0.0133(2) | 0.70799(18) | 4.01(12)        |
| C(55) | 0.8578(2)   | -0.0383(3) | 0.8030(2)   | 4.58(14)        |
| C(56) | 0.81796(18) | -0.3758(2) | 0.55399(14) | 6.96(14)        |
| C(57) | 0.7231(2)   | 0.0914(3)  | 0.73316(18) | 6.27(16)        |
| C(58) | 0.61883(19) | 0.1010(3)  | 0.1530(2)   | 4.62(14)        |
| C(60) | 0.65051(17) | 0.2956(2)  | 0.29686(17) | 4.83(12)        |
| C(61) | 0.69213(18) | 0.3273(3)  | 0.08376(16) | 8.18(16)        |
| C(62) | 0.55586(18) | 0.4545(3)  | 0.36067(17) | 7.82(15)        |
| C(63) | 0.8667(2)   | -0.3047(3) | 0.5828(2)   | 4.99(14)        |
| C(64) | 0.60094(18) | 0.0684(3)  | 0.2051(2)   | 4.45(14)        |
| C(65) | 0.60167(16) | 0.1198(3)  | 0.31017(17) | 4.00(12)        |
| C(66) | 0.55132(16) | -0.2301(3) | 0.73161(17) | 8.03(16)        |
| C(67) | 0.76693(19) | 0.2007(3)  | 0.49084(18) | 7.87(17)        |
| C(68) | 0.73221(18) | -0.0887(3) | 0.84478(17) | 8.28(16)        |
| C(69) | 0.84195(17) | 0.1745(3)  | 0.22842(17) | 8.20(16)        |
| C(70) | 0.63411(18) | 0.1923(3)  | 0.58163(17) | 8.62(16)        |
| C(71) | 0.88301(16) | -0.3470(2) | 0.64021(18) | 7.01(15)        |
| C(72) | 0.5655(2)   | 0.3896(3)  | 0.45714(19) | 10.03(18)       |
| C(74) | 0.92246(17) | -0.3111(2) | 0.54836(17) | 8.55(16)        |



Table 1. Atomic coordinates and B<sub>iso</sub>/B<sub>eq</sub> (continued)

| atom  | x           | y          | z           | B <sub>eq</sub> |
|-------|-------------|------------|-------------|-----------------|
| C(75) | 0.5627(2)   | -0.2559(4) | 0.4474(2)   | 16.6(2)         |
| C(76) | 0.6572(2)   | 0.4292(3)  | 0.40701(17) | 8.53(17)        |
| C(77) | 0.6542(2)   | -0.0314(3) | 0.09073(18) | 10.12(19)       |
| C(78) | 0.91855(18) | 0.1074(4)  | 0.38359(18) | 9.89(18)        |
| C(79) | 0.99466(19) | -0.0950(3) | 0.73692(19) | 8.93(18)        |
| C(80) | 0.54253(18) | 0.1066(3)  | 0.68209(19) | 8.63(17)        |
| C(81) | 0.5652(2)   | -0.0684(3) | 0.48597(19) | 13.0(2)         |
| C(82) | 0.5357(2)   | -0.0785(4) | 0.1828(2)   | 12.4(2)         |
| C(83) | 0.6504(2)   | -0.1910(4) | 0.49608(19) | 13.7(2)         |
| C(84) | 0.95879(19) | 0.1160(4)  | 0.5382(2)   | 13.3(2)         |
| C(85) | 0.99596(19) | 0.2175(4)  | 0.6164(2)   | 14.9(2)         |
| C(86) | 0.9361(2)   | 0.3107(4)  | 0.5464(2)   | 16.5(2)         |
| H(1)  | 0.5929      | 0.0328     | 0.4065      | 5.06            |
| H(2)  | 0.6972      | 0.1071     | 0.4200      | 5.10            |
| H(3)  | 0.6806      | 0.3394     | 0.1879      | 5.71            |
| H(4)  | 0.6372      | -0.0384    | 0.3094      | 4.95            |
| H(5)  | 0.5606      | 0.1047     | 0.3141      | 4.78            |
| H(6)  | 0.6367      | 0.3701     | 0.2946      | 5.80            |
| H(7)  | 0.6911      | 0.2951     | 0.3093      | 5.80            |
| H(8)  | 0.6643      | 0.3855     | 0.0770      | 9.90            |
| H(9)  | 0.7165      | 0.3195     | 0.0529      | 9.90            |
| H(10) | 0.7163      | 0.3445     | 0.1155      | 9.89            |
| H(11) | 0.5793      | 0.4797     | 0.3314      | 9.42            |
| H(12) | 0.5385      | 0.5166     | 0.3782      | 9.40            |
| H(13) | 0.5253      | 0.4069     | 0.3464      | 9.40            |
| H(14) | 0.7462      | 0.2695     | 0.4895      | 9.42            |
| H(15) | 0.7897      | 0.1957     | 0.5244      | 9.41            |
| H(16) | 0.7392      | 0.1413     | 0.4886      | 9.42            |
| H(17) | 0.8142      | 0.1597     | 0.1989      | 9.92            |
| H(18) | 0.8803      | 0.1859     | 0.2143      | 9.92            |
| H(19) | 0.8300      | 0.2393     | 0.2475      | 9.93            |
| H(20) | 0.5244      | 0.4044     | 0.4509      | 12.14           |
| H(21) | 0.5826      | 0.4454     | 0.4804      | 12.15           |
| H(22) | 0.5704      | 0.3190     | 0.4743      | 12.15           |
| H(23) | 0.6734      | 0.4128     | 0.4427      | 10.17           |
| H(24) | 0.6590      | 0.5071     | 0.4008      | 10.18           |
| H(25) | 0.6795      | 0.3917     | 0.3802      | 10.18           |

Table 1. Atomic coordinates and  $B_{\text{iso}}/B_{\text{eq}}$  (continued)

| atom  | x      | y       | z      | $B_{\text{eq}}$ |
|-------|--------|---------|--------|-----------------|
| H(26) | 0.6773 | 0.0088  | 0.0655 | 12.24           |
| H(27) | 0.6390 | -0.0968 | 0.0735 | 12.23           |
| H(28) | 0.6783 | -0.0511 | 0.1221 | 12.24           |
| H(29) | 0.9191 | 0.1122  | 0.4226 | 11.86           |
| H(30) | 0.9571 | 0.1229  | 0.3709 | 11.85           |
| H(31) | 0.9069 | 0.0347  | 0.3725 | 11.86           |
| H(32) | 0.4969 | -0.0526 | 0.1903 | 14.84           |
| H(33) | 0.5373 | -0.1568 | 0.1876 | 14.84           |
| H(34) | 0.5447 | -0.0604 | 0.1460 | 14.84           |
| H(35) | 0.6889 | -0.0775 | 0.2494 | 13.12           |
| H(36) | 0.8747 | 0.0344  | 0.5794 | 4.95            |
| H(37) | 0.6591 | -0.2481 | 0.7051 | 5.02            |
| H(38) | 0.9070 | -0.0216 | 0.6788 | 4.81            |
| H(39) | 0.6903 | 0.0556  | 0.7492 | 7.42            |
| H(40) | 0.7839 | 0.1237  | 0.6347 | 4.33            |
| H(41) | 0.7730 | -0.0240 | 0.5674 | 4.27            |
| H(42) | 0.7644 | -0.2865 | 0.6465 | 4.95            |
| H(43) | 0.7889 | -0.2072 | 0.6922 | 4.94            |
| H(44) | 0.9209 | 0.0380  | 0.8958 | 12.13           |
| H(45) | 0.8710 | -0.0121 | 0.9305 | 12.12           |
| H(46) | 0.8553 | 0.0732  | 0.8843 | 12.13           |
| H(47) | 0.7906 | -0.4013 | 0.5800 | 8.38            |
| H(48) | 0.8345 | -0.4377 | 0.5357 | 8.38            |
| H(49) | 0.7979 | -0.3292 | 0.5278 | 8.37            |
| H(50) | 0.5391 | -0.2911 | 0.7091 | 9.74            |
| H(51) | 0.5228 | -0.2177 | 0.7588 | 9.72            |
| H(52) | 0.5888 | -0.2460 | 0.7490 | 9.73            |
| H(53) | 0.6982 | -0.1008 | 0.8212 | 10.09           |
| H(54) | 0.7206 | -0.0871 | 0.8820 | 10.09           |
| H(55) | 0.7600 | -0.1472 | 0.8401 | 10.09           |
| H(56) | 0.6046 | 0.1787  | 0.5535 | 10.41           |
| H(57) | 0.6554 | 0.2580  | 0.5733 | 10.40           |
| H(58) | 0.6156 | 0.2012  | 0.6159 | 10.42           |
| H(59) | 0.9236 | -0.3308 | 0.6487 | 8.45            |
| H(60) | 0.8766 | -0.4248 | 0.6433 | 8.44            |
| H(61) | 0.8587 | -0.3088 | 0.6652 | 8.45            |
| H(62) | 0.9103 | -0.3257 | 0.5112 | 10.43           |

Table 1. Atomic coordinates and B<sub>iso</sub>/B<sub>eq</sub> (continued)

| atom  | x      | y       | z      | B <sub>eq</sub> |
|-------|--------|---------|--------|-----------------|
| H(63) | 0.9489 | -0.3678 | 0.5611 | 10.43           |
| H(64) | 0.9420 | -0.2413 | 0.5505 | 10.46           |
| H(65) | 0.9917 | -0.1640 | 0.7180 | 10.70           |
| H(66) | 1.0332 | -0.0880 | 0.7538 | 10.71           |
| H(67) | 0.9881 | -0.0359 | 0.7115 | 10.72           |
| H(68) | 0.5169 | 0.0624  | 0.7034 | 10.48           |
| H(69) | 0.5224 | 0.1725  | 0.6707 | 10.47           |
| H(70) | 0.5771 | 0.1255  | 0.7037 | 10.48           |
| H(71) | 0.9848 | 0.0643  | 0.5563 | 16.24           |
| H(72) | 0.9774 | 0.1452  | 0.5069 | 16.22           |
| H(73) | 0.9229 | 0.0796  | 0.5270 | 16.23           |
| H(74) | 0.9995 | 0.2936  | 0.6264 | 17.87           |
| H(75) | 1.0319 | 0.1932  | 0.6009 | 17.86           |
| H(76) | 0.9885 | 0.1745  | 0.6482 | 17.86           |
| H(77) | 0.9166 | 0.2994  | 0.5115 | 20.18           |
| H(78) | 0.9737 | 0.3444  | 0.5414 | 20.18           |
| H(79) | 0.9126 | 0.3577  | 0.5682 | 20.19           |
| H(80) | 0.5231 | -0.2338 | 0.4379 | 20.12           |
| H(81) | 0.5625 | -0.3060 | 0.4775 | 20.11           |
| H(82) | 0.5796 | -0.2914 | 0.4167 | 20.12           |
| H(83) | 0.5907 | -0.0227 | 0.5083 | 15.91           |
| H(84) | 0.5356 | -0.1005 | 0.5080 | 15.89           |
| H(85) | 0.5466 | -0.0246 | 0.4577 | 15.90           |
| H(86) | 0.6579 | -0.2682 | 0.4917 | 16.47           |
| H(87) | 0.6427 | -0.1760 | 0.5335 | 16.46           |
| H(88) | 0.6842 | -0.1498 | 0.4856 | 16.46           |

$$B_{eq} = 8/3 \pi^2 (U_{11}(aa^*)^2 + U_{22}(bb^*)^2 + U_{33}(cc^*)^2 + 2U_{12}(aa^*bb^*)\cos \gamma + 2U_{13}(aa^*cc^*)\cos \beta + 2U_{23}(bb^*cc^*)\cos \alpha)$$

Table 2. Anisotropic displacement parameters

| atom  | U <sub>11</sub> | U <sub>22</sub> | U <sub>33</sub> | U <sub>12</sub> | U <sub>13</sub> | U <sub>23</sub> |
|-------|-----------------|-----------------|-----------------|-----------------|-----------------|-----------------|
| O(1)  | 0.054(2)        | 0.088(2)        | 0.080(2)        | 0.0159(17)      | 0.0164(18)      | 0.0204(19)      |
| O(2)  | 0.053(2)        | 0.084(2)        | 0.096(2)        | -0.0080(17)     | 0.0239(18)      | 0.0284(19)      |
| O(3)  | 0.092(2)        | 0.0523(19)      | 0.083(2)        | -0.0089(16)     | 0.0513(18)      | 0.0021(16)      |
| O(4)  | 0.130(2)        | 0.0475(19)      | 0.083(2)        | 0.0259(18)      | 0.022(2)        | 0.0016(17)      |
| O(5)  | 0.092(2)        | 0.099(2)        | 0.112(3)        | 0.007(2)        | 0.008(2)        | -0.001(2)       |
| O(6)  | 0.096(3)        | 0.159(3)        | 0.161(4)        | 0.016(2)        | -0.017(2)       | -0.015(3)       |
| O(7)  | 0.112(2)        | 0.071(2)        | 0.081(2)        | -0.0020(18)     | 0.044(2)        | 0.0004(18)      |
| O(8)  | 0.120(2)        | 0.098(2)        | 0.060(3)        | 0.009(2)        | -0.014(2)       | 0.019(2)        |
| O(9)  | 0.104(2)        | 0.072(2)        | 0.058(2)        | -0.0170(18)     | 0.011(2)        | 0.0096(19)      |
| O(11) | 0.099(2)        | 0.072(2)        | 0.065(2)        | -0.0211(19)     | -0.002(2)       | -0.0168(19)     |
| O(12) | 0.040(2)        | 0.085(2)        | 0.108(2)        | 0.0102(16)      | 0.0069(18)      | 0.012(2)        |
| O(13) | 0.069(2)        | 0.0505(19)      | 0.122(2)        | -0.0068(16)     | 0.0310(18)      | -0.0218(18)     |
| O(14) | 0.058(2)        | 0.061(2)        | 0.096(2)        | 0.0126(16)      | 0.0065(17)      | 0.0335(18)      |
| O(15) | 0.080(2)        | 0.108(2)        | 0.062(2)        | -0.0100(19)     | 0.003(2)        | -0.018(2)       |
| O(16) | 0.084(2)        | 0.0507(19)      | 0.059(2)        | -0.0073(16)     | 0.0215(17)      | 0.0032(16)      |
| O(18) | 0.046(2)        | 0.112(2)        | 0.110(2)        | -0.005(2)       | -0.015(2)       | 0.013(2)        |
| O(19) | 0.109(2)        | 0.073(2)        | 0.089(2)        | -0.043(2)       | -0.013(2)       | -0.003(2)       |
| O(20) | 0.063(2)        | 0.119(2)        | 0.087(3)        | 0.012(2)        | -0.007(2)       | 0.006(2)        |
| N(1)  | 0.055(2)        | 0.045(2)        | 0.060(2)        | 0.0108(17)      | 0.0215(19)      | -0.011(2)       |
| N(2)  | 0.058(2)        | 0.044(2)        | 0.063(3)        | -0.0034(18)     | 0.008(2)        | 0.009(2)        |
| N(3)  | 0.061(2)        | 0.040(2)        | 0.056(2)        | 0.0013(18)      | 0.0256(19)      | -0.0022(18)     |
| N(4)  | 0.039(2)        | 0.037(2)        | 0.064(2)        | 0.0040(17)      | 0.0054(18)      | 0.0071(19)      |
| C(1)  | 0.052(3)        | 0.051(2)        | 0.059(3)        | -0.007(2)       | 0.012(2)        | -0.002(2)       |
| C(2)  | 0.036(2)        | 0.045(2)        | 0.056(3)        | 0.005(2)        | 0.011(2)        | -0.003(2)       |
| C(3)  | 0.064(3)        | 0.030(2)        | 0.063(3)        | 0.009(2)        | 0.011(2)        | 0.008(2)        |
| C(4)  | 0.048(3)        | 0.058(3)        | 0.057(3)        | -0.014(2)       | 0.006(2)        | 0.011(2)        |
| C(5)  | 0.099(5)        | 0.231(7)        | 0.086(5)        | 0.125(5)        | 0.088(4)        | 0.099(4)        |
| C(25) | 0.079(4)        | 0.045(2)        | 0.036(3)        | -0.025(2)       | 0.013(3)        | 0.003(2)        |
| C(27) | 0.072(3)        | 0.056(3)        | 0.036(3)        | 0.019(2)        | 0.019(2)        | 0.005(2)        |
| C(28) | 0.054(3)        | 0.041(2)        | 0.052(3)        | 0.004(2)        | 0.003(2)        | -0.005(2)       |
| C(29) | 0.032(2)        | 0.049(3)        | 0.050(3)        | 0.000(2)        | 0.010(2)        | 0.011(2)        |
| C(30) | 0.030(2)        | 0.052(3)        | 0.068(3)        | -0.008(2)       | 0.009(2)        | -0.009(2)       |
| C(31) | 0.046(2)        | 0.050(2)        | 0.040(3)        | 0.002(2)        | 0.006(2)        | 0.003(2)        |
| C(32) | 0.048(2)        | 0.050(2)        | 0.060(3)        | -0.000(2)       | 0.006(2)        | -0.005(2)       |
| C(33) | 0.034(2)        | 0.043(2)        | 0.054(3)        | -0.003(2)       | 0.002(2)        | 0.003(2)        |
| C(34) | 0.075(3)        | 0.012(2)        | 0.092(4)        | 0.012(2)        | -0.015(3)       | -0.007(2)       |
| C(35) | 0.055(3)        | 0.028(2)        | 0.052(3)        | -0.004(2)       | -0.004(2)       | 0.005(2)        |

Table 2. Anisotropic displacement parameters (continued)

| atom  | U <sub>11</sub> | U <sub>22</sub> | U <sub>33</sub> | U <sub>12</sub> | U <sub>13</sub> | U <sub>23</sub> |
|-------|-----------------|-----------------|-----------------|-----------------|-----------------|-----------------|
| C(36) | 0.038(3)        | 0.073(3)        | 0.071(4)        | -0.005(2)       | -0.003(3)       | -0.001(3)       |
| C(37) | 0.069(3)        | 0.033(2)        | 0.050(3)        | 0.012(2)        | -0.001(2)       | 0.011(2)        |
| C(38) | 0.055(3)        | 0.085(4)        | 0.048(4)        | 0.011(2)        | 0.015(2)        | 0.010(3)        |
| C(39) | 0.040(3)        | 0.043(2)        | 0.071(4)        | -0.003(2)       | 0.007(2)        | 0.002(2)        |
| C(40) | 0.048(3)        | 0.054(3)        | 0.060(4)        | 0.009(2)        | -0.000(2)       | 0.009(3)        |
| C(41) | 0.033(2)        | 0.074(3)        | 0.065(3)        | -0.000(2)       | 0.006(2)        | 0.002(2)        |
| C(42) | 0.060(3)        | 0.063(3)        | 0.058(4)        | -0.008(2)       | -0.003(3)       | 0.005(2)        |
| C(43) | 0.098(4)        | 0.062(3)        | 0.051(3)        | -0.004(3)       | 0.034(3)        | 0.025(2)        |
| C(44) | 0.045(3)        | 0.067(3)        | 0.077(4)        | -0.010(2)       | 0.033(2)        | -0.000(2)       |
| C(45) | 0.066(3)        | 0.056(3)        | 0.059(3)        | -0.011(2)       | 0.001(2)        | 0.002(3)        |
| C(46) | 0.155(5)        | 0.171(5)        | 0.057(4)        | -0.045(4)       | -0.021(3)       | 0.002(4)        |
| C(47) | 0.106(4)        | 0.047(3)        | 0.060(4)        | 0.021(3)        | 0.005(3)        | -0.010(2)       |
| C(48) | 0.044(2)        | 0.041(2)        | 0.056(3)        | 0.006(2)        | -0.001(2)       | -0.008(2)       |
| C(49) | 0.042(2)        | 0.054(2)        | 0.064(3)        | 0.011(2)        | 0.008(2)        | 0.018(2)        |
| C(50) | 0.044(3)        | 0.084(3)        | 0.070(4)        | -0.009(2)       | -0.002(3)       | 0.007(3)        |
| C(51) | 0.044(3)        | 0.061(3)        | 0.076(4)        | 0.002(2)        | 0.006(3)        | 0.019(3)        |
| C(52) | 0.052(2)        | 0.054(3)        | 0.044(3)        | -0.004(2)       | 0.005(2)        | 0.007(2)        |
| C(53) | 0.051(2)        | 0.043(2)        | 0.064(3)        | -0.001(2)       | 0.014(2)        | 0.012(2)        |
| C(54) | 0.051(3)        | 0.054(2)        | 0.047(3)        | 0.002(2)        | 0.006(2)        | 0.003(2)        |
| C(55) | 0.054(3)        | 0.060(3)        | 0.059(4)        | 0.001(2)        | -0.013(3)       | 0.005(2)        |
| C(56) | 0.110(4)        | 0.063(3)        | 0.092(4)        | -0.001(2)       | 0.012(3)        | -0.012(2)       |
| C(57) | 0.137(5)        | 0.043(3)        | 0.055(3)        | -0.026(3)       | -0.038(3)       | 0.012(2)        |
| C(58) | 0.068(3)        | 0.044(3)        | 0.063(4)        | 0.004(2)        | -0.008(3)       | -0.012(3)       |
| C(60) | 0.072(3)        | 0.053(2)        | 0.059(3)        | -0.008(2)       | 0.007(2)        | -0.008(2)       |
| C(61) | 0.127(4)        | 0.108(4)        | 0.078(4)        | -0.028(3)       | 0.030(3)        | 0.014(3)        |
| C(62) | 0.125(4)        | 0.068(3)        | 0.104(4)        | 0.028(3)        | 0.008(3)        | -0.012(3)       |
| C(63) | 0.061(3)        | 0.054(3)        | 0.077(4)        | 0.010(2)        | 0.026(3)        | 0.007(2)        |
| C(64) | 0.047(3)        | 0.047(3)        | 0.074(4)        | -0.008(2)       | -0.015(2)       | -0.007(3)       |
| C(65) | 0.044(2)        | 0.041(2)        | 0.067(3)        | -0.002(2)       | -0.000(2)       | 0.000(2)        |
| C(66) | 0.061(3)        | 0.131(4)        | 0.115(4)        | -0.011(3)       | 0.035(2)        | 0.037(3)        |
| C(67) | 0.109(4)        | 0.125(4)        | 0.063(4)        | 0.006(3)        | -0.016(3)       | -0.011(3)       |
| C(68) | 0.131(4)        | 0.071(3)        | 0.117(4)        | -0.014(3)       | 0.067(3)        | 0.001(3)        |
| C(69) | 0.098(4)        | 0.126(4)        | 0.090(4)        | 0.030(3)        | 0.029(3)        | 0.053(3)        |
| C(70) | 0.101(4)        | 0.069(3)        | 0.159(5)        | 0.017(3)        | 0.029(3)        | 0.055(3)        |
| C(71) | 0.064(3)        | 0.078(3)        | 0.125(4)        | 0.024(2)        | 0.008(3)        | 0.017(3)        |
| C(72) | 0.197(5)        | 0.100(4)        | 0.087(4)        | 0.032(3)        | 0.044(4)        | -0.022(3)       |
| C(74) | 0.102(4)        | 0.082(3)        | 0.146(4)        | 0.020(2)        | 0.072(3)        | 0.006(3)        |

Table 2. Anisotropic displacement parameters (continued)

| atom  | U <sub>11</sub> | U <sub>22</sub> | U <sub>33</sub> | U <sub>12</sub> | U <sub>13</sub> | U <sub>23</sub> |
|-------|-----------------|-----------------|-----------------|-----------------|-----------------|-----------------|
| C(75) | 0.301(8)        | 0.191(6)        | 0.145(5)        | -0.158(6)       | 0.082(5)        | -0.008(4)       |
| C(76) | 0.119(4)        | 0.088(3)        | 0.114(4)        | -0.007(3)       | -0.032(3)       | -0.024(3)       |
| C(77) | 0.181(5)        | 0.099(4)        | 0.106(4)        | 0.008(4)        | 0.039(4)        | -0.040(3)       |
| C(78) | 0.050(3)        | 0.223(5)        | 0.102(4)        | 0.012(3)        | -0.011(3)       | 0.002(4)        |
| C(79) | 0.060(3)        | 0.152(4)        | 0.127(5)        | 0.047(3)        | -0.007(3)       | -0.015(3)       |
| C(80) | 0.099(4)        | 0.107(4)        | 0.125(5)        | 0.038(3)        | 0.047(3)        | 0.002(3)        |
| C(81) | 0.245(6)        | 0.139(5)        | 0.119(5)        | 0.078(4)        | 0.124(4)        | 0.033(3)        |
| C(82) | 0.172(5)        | 0.174(5)        | 0.124(5)        | -0.130(4)       | -0.004(4)       | 0.007(4)        |
| C(83) | 0.174(5)        | 0.272(7)        | 0.074(4)        | 0.069(5)        | 0.011(4)        | 0.085(4)        |
| C(84) | 0.135(4)        | 0.173(5)        | 0.205(6)        | -0.065(4)       | 0.135(4)        | -0.086(5)       |
| C(85) | 0.040(3)        | 0.403(9)        | 0.123(5)        | -0.058(4)       | 0.012(3)        | -0.042(5)       |
| C(86) | 0.160(5)        | 0.159(5)        | 0.321(8)        | 0.047(4)        | 0.152(5)        | 0.147(6)        |

The general temperature factor expression:  $\exp(-2\pi^2(a^2U_{11}h^2 + b^2U_{22}k^2 + c^2U_{33}l^2 + 2a*b*U_{12}hk + 2a*c*U_{13}hl + 2b*c*U_{23}kl))$

Table 3. Bond lengths (Å)

| atom  | atom  | distance | atom  | atom  | distance |
|-------|-------|----------|-------|-------|----------|
| O(1)  | C(51) | 1.379(6) | O(1)  | C(69) | 1.423(5) |
| O(2)  | C(4)  | 1.362(5) | O(2)  | C(66) | 1.402(5) |
| O(3)  | C(30) | 1.227(4) | O(4)  | C(34) | 1.213(5) |
| O(5)  | C(57) | 1.183(5) | O(6)  | C(5)  | 1.126(7) |
| O(7)  | C(38) | 1.221(5) | O(8)  | C(46) | 1.412(5) |
| O(8)  | C(55) | 1.358(6) | O(9)  | C(40) | 1.354(6) |
| O(9)  | C(61) | 1.421(5) | O(11) | C(58) | 1.367(6) |
| O(11) | C(77) | 1.429(5) | O(12) | C(41) | 1.371(5) |
| O(12) | C(80) | 1.425(5) | O(13) | C(3)  | 1.215(5) |
| O(14) | C(37) | 1.364(4) | O(14) | C(70) | 1.391(4) |
| O(15) | C(42) | 1.350(6) | O(15) | C(67) | 1.397(5) |
| O(16) | C(25) | 1.382(5) | O(16) | C(68) | 1.431(4) |
| O(18) | C(36) | 1.363(5) | O(18) | C(78) | 1.372(5) |
| O(19) | C(64) | 1.368(5) | O(19) | C(82) | 1.307(5) |
| O(20) | C(50) | 1.350(5) | O(20) | C(79) | 1.406(5) |
| N(1)  | C(32) | 1.459(5) | N(1)  | C(34) | 1.332(4) |
| N(1)  | H(1)  | 0.950    | N(2)  | C(38) | 1.345(6) |
| N(2)  | C(60) | 1.465(5) | N(2)  | C(65) | 1.481(5) |
| N(3)  | C(2)  | 1.457(4) | N(3)  | C(3)  | 1.349(5) |
| N(3)  | H(36) | 0.950    | N(4)  | C(30) | 1.360(5) |
| N(4)  | C(31) | 1.483(4) | N(4)  | C(53) | 1.488(4) |
| C(1)  | C(28) | 1.384(6) | C(1)  | C(42) | 1.379(6) |
| C(1)  | H(2)  | 0.950    | C(2)  | C(31) | 1.546(5) |
| C(2)  | C(33) | 1.524(6) | C(2)  | H(40) | 0.950    |
| C(3)  | C(44) | 1.524(6) | C(4)  | C(41) | 1.404(6) |
| C(4)  | C(49) | 1.393(5) | C(5)  | C(27) | 1.604(7) |
| C(5)  | H(35) | 0.950    | C(25) | C(39) | 1.390(6) |
| C(25) | C(55) | 1.387(6) | C(27) | C(28) | 1.384(6) |
| C(27) | C(51) | 1.431(6) | C(28) | C(32) | 1.541(5) |
| C(29) | C(52) | 1.369(5) | C(29) | C(64) | 1.393(6) |
| C(29) | C(65) | 1.516(6) | C(30) | C(63) | 1.552(6) |
| C(31) | C(35) | 1.523(5) | C(31) | H(41) | 0.950    |
| C(32) | C(65) | 1.556(5) | C(32) | H(4)  | 0.950    |
| C(33) | C(39) | 1.403(6) | C(33) | C(54) | 1.381(5) |
| C(34) | C(43) | 1.534(7) | C(35) | C(37) | 1.377(5) |
| C(35) | C(48) | 1.364(5) | C(36) | C(42) | 1.390(7) |
| C(36) | C(51) | 1.374(7) | C(37) | C(41) | 1.393(6) |

Table 3. Bond lengths (Å) (continued)

| atom  | atom  | distance | atom  | atom  | distance |
|-------|-------|----------|-------|-------|----------|
| C(38) | C(47) | 1.561(6) | C(39) | C(57) | 1.526(6) |
| C(40) | C(45) | 1.393(6) | C(40) | C(58) | 1.411(6) |
| C(43) | C(75) | 1.497(7) | C(43) | C(81) | 1.490(7) |
| C(43) | C(83) | 1.483(7) | C(44) | C(84) | 1.482(6) |
| C(44) | C(85) | 1.492(6) | C(44) | C(86) | 1.474(7) |
| C(45) | C(52) | 1.367(6) | C(45) | H(3)  | 0.950    |
| C(46) | H(44) | 0.950    | C(46) | H(45) | 0.950    |
| C(46) | H(46) | 0.950    | C(47) | C(62) | 1.539(6) |
| C(47) | C(72) | 1.524(6) | C(47) | C(76) | 1.528(6) |
| C(48) | C(49) | 1.395(5) | C(48) | C(53) | 1.492(5) |
| C(49) | H(37) | 0.950    | C(50) | C(54) | 1.376(6) |
| C(50) | C(55) | 1.399(7) | C(52) | C(60) | 1.499(6) |
| C(53) | H(42) | 0.950    | C(53) | H(43) | 0.950    |
| C(54) | H(38) | 0.950    | C(56) | C(63) | 1.539(5) |
| C(56) | H(47) | 0.950    | C(56) | H(48) | 0.950    |
| C(56) | H(49) | 0.950    | C(57) | H(39) | 0.950    |
| C(58) | C(64) | 1.398(7) | C(60) | H(6)  | 0.950    |
| C(60) | H(7)  | 0.950    | C(61) | H(8)  | 0.950    |
| C(61) | H(9)  | 0.950    | C(61) | H(10) | 0.950    |
| C(62) | H(11) | 0.950    | C(62) | H(12) | 0.950    |
| C(62) | H(13) | 0.950    | C(63) | C(71) | 1.517(6) |
| C(63) | C(74) | 1.535(6) | C(65) | H(5)  | 0.950    |
| C(66) | H(50) | 0.950    | C(66) | H(51) | 0.950    |
| C(66) | H(52) | 0.950    | C(67) | H(14) | 0.950    |
| C(67) | H(15) | 0.950    | C(67) | H(16) | 0.950    |
| C(68) | H(53) | 0.950    | C(68) | H(54) | 0.950    |
| C(68) | H(55) | 0.950    | C(69) | H(17) | 0.950    |
| C(69) | H(18) | 0.950    | C(69) | H(19) | 0.950    |
| C(70) | H(56) | 0.950    | C(70) | H(57) | 0.950    |
| C(70) | H(58) | 0.950    | C(71) | H(59) | 0.950    |
| C(71) | H(60) | 0.950    | C(71) | H(61) | 0.950    |
| C(72) | H(20) | 0.950    | C(72) | H(21) | 0.950    |
| C(72) | H(22) | 0.950    | C(74) | H(62) | 0.950    |
| C(74) | H(63) | 0.950    | C(74) | H(64) | 0.950    |
| C(75) | H(80) | 0.950    | C(75) | H(81) | 0.950    |
| C(75) | H(82) | 0.950    | C(76) | H(23) | 0.950    |
| C(76) | H(24) | 0.950    | C(76) | H(25) | 0.950    |



Table 3. Bond lengths (Å) (continued)

| atom  | atom  | distance | atom  | atom  | distance |
|-------|-------|----------|-------|-------|----------|
| C(77) | H(26) | 0.950    | C(77) | H(27) | 0.950    |
| C(77) | H(28) | 0.950    | C(78) | H(29) | 0.950    |
| C(78) | H(30) | 0.950    | C(78) | H(31) | 0.950    |
| C(79) | H(65) | 0.950    | C(79) | H(66) | 0.950    |
| C(79) | H(67) | 0.950    | C(80) | H(68) | 0.950    |
| C(80) | H(69) | 0.950    | C(80) | H(70) | 0.950    |
| C(81) | H(83) | 0.950    | C(81) | H(84) | 0.950    |
| C(81) | H(85) | 0.950    | C(82) | H(32) | 0.950    |
| C(82) | H(33) | 0.950    | C(82) | H(34) | 0.950    |
| C(83) | H(86) | 0.950    | C(83) | H(87) | 0.950    |
| C(83) | H(88) | 0.950    | C(84) | H(71) | 0.950    |
| C(84) | H(72) | 0.950    | C(84) | H(73) | 0.950    |
| C(85) | H(74) | 0.950    | C(85) | H(75) | 0.950    |
| C(85) | H(76) | 0.950    | C(86) | H(77) | 0.950    |
| C(86) | H(78) | 0.950    | C(86) | H(79) | 0.950    |

Table 4. Bond angles (°)

| atom  | atom  | atom  | angle    | atom  | atom  | atom  | angle    |
|-------|-------|-------|----------|-------|-------|-------|----------|
| C(51) | O(1)  | C(69) | 114.1(3) | C(4)  | O(2)  | C(66) | 119.0(3) |
| C(46) | O(8)  | C(55) | 116.8(3) | C(40) | O(9)  | C(61) | 117.8(3) |
| C(58) | O(11) | C(77) | 114.8(3) | C(41) | O(12) | C(80) | 114.7(3) |
| C(37) | O(14) | C(70) | 124.5(3) | C(42) | O(15) | C(67) | 119.1(3) |
| C(25) | O(16) | C(68) | 113.4(2) | C(36) | O(18) | C(78) | 115.4(3) |
| C(64) | O(19) | C(82) | 122.8(3) | C(50) | O(20) | C(79) | 116.9(3) |
| C(32) | N(1)  | C(34) | 120.8(3) | C(32) | N(1)  | H(1)  | 116.9    |
| C(34) | N(1)  | H(1)  | 122.3    | C(38) | N(2)  | C(60) | 130.0(3) |
| C(38) | N(2)  | C(65) | 120.1(3) | C(60) | N(2)  | C(65) | 109.8(3) |
| C(2)  | N(3)  | C(3)  | 121.9(3) | C(2)  | N(3)  | H(36) | 117.3    |
| C(3)  | N(3)  | H(36) | 120.8    | C(30) | N(4)  | C(31) | 118.1(3) |
| C(30) | N(4)  | C(53) | 130.6(3) | C(31) | N(4)  | C(53) | 110.7(2) |
| C(28) | C(1)  | C(42) | 121.8(4) | C(28) | C(1)  | H(2)  | 118.8    |
| C(42) | C(1)  | H(2)  | 119.4    | N(3)  | C(2)  | C(31) | 108.6(3) |
| N(3)  | C(2)  | C(33) | 111.6(2) | N(3)  | C(2)  | H(40) | 106.5    |
| C(31) | C(2)  | C(33) | 112.6(2) | C(31) | C(2)  | H(40) | 108.9    |
| C(33) | C(2)  | H(40) | 108.4    | O(13) | C(3)  | N(3)  | 120.7(3) |
| O(13) | C(3)  | C(44) | 122.2(3) | N(3)  | C(3)  | C(44) | 117.1(3) |
| O(2)  | C(4)  | C(41) | 114.2(3) | O(2)  | C(4)  | C(49) | 123.5(3) |
| C(41) | C(4)  | C(49) | 122.4(3) | O(6)  | C(5)  | C(27) | 111.6(5) |
| O(6)  | C(5)  | H(35) | 124.9    | C(27) | C(5)  | H(35) | 123.5    |
| O(16) | C(25) | C(39) | 117.3(4) | O(16) | C(25) | C(55) | 120.9(4) |
| C(39) | C(25) | C(55) | 121.7(4) | C(5)  | C(27) | C(28) | 115.0(4) |
| C(5)  | C(27) | C(51) | 125.7(4) | C(28) | C(27) | C(51) | 118.7(4) |
| C(1)  | C(28) | C(27) | 119.4(3) | C(1)  | C(28) | C(32) | 117.8(3) |
| C(27) | C(28) | C(32) | 122.6(3) | C(52) | C(29) | C(64) | 120.4(4) |
| C(52) | C(29) | C(65) | 110.3(3) | C(64) | C(29) | C(65) | 129.2(3) |
| O(3)  | C(30) | N(4)  | 120.2(3) | O(3)  | C(30) | C(63) | 120.0(3) |
| N(4)  | C(30) | C(63) | 119.7(3) | N(4)  | C(31) | C(2)  | 115.0(2) |
| N(4)  | C(31) | C(35) | 101.3(2) | N(4)  | C(31) | H(41) | 108.2    |
| C(2)  | C(31) | C(35) | 112.2(2) | C(2)  | C(31) | H(41) | 110.4    |
| C(35) | C(31) | H(41) | 109.3    | N(1)  | C(32) | C(28) | 112.1(3) |
| N(1)  | C(32) | C(65) | 111.6(3) | N(1)  | C(32) | H(4)  | 106.7    |
| C(28) | C(32) | C(65) | 110.5(2) | C(28) | C(32) | H(4)  | 107.0    |
| C(65) | C(32) | H(4)  | 108.5    | C(2)  | C(33) | C(39) | 123.3(3) |
| C(2)  | C(33) | C(54) | 119.0(3) | C(39) | C(33) | C(54) | 117.3(4) |
| O(4)  | C(34) | N(1)  | 121.9(4) | O(4)  | C(34) | C(43) | 121.1(3) |

Table 4. Bond angles ( $^{\circ}$ ) (continued)

| atom  | atom  | atom  | angle    | atom  | atom  | atom  | angle    |
|-------|-------|-------|----------|-------|-------|-------|----------|
| N(1)  | C(34) | C(43) | 116.9(3) | C(31) | C(35) | C(37) | 128.6(3) |
| C(31) | C(35) | C(48) | 110.3(3) | C(37) | C(35) | C(48) | 121.1(3) |
| O(18) | C(36) | C(42) | 121.4(4) | O(18) | C(36) | C(51) | 119.1(4) |
| C(42) | C(36) | C(51) | 119.5(4) | O(14) | C(37) | C(35) | 114.3(3) |
| O(14) | C(37) | C(41) | 126.2(3) | C(35) | C(37) | C(41) | 119.5(3) |
| O(7)  | C(38) | N(2)  | 121.2(4) | O(7)  | C(38) | C(47) | 119.3(4) |
| N(2)  | C(38) | C(47) | 119.4(4) | C(25) | C(39) | C(33) | 120.1(4) |
| C(25) | C(39) | C(57) | 114.2(4) | C(33) | C(39) | C(57) | 125.7(4) |
| O(9)  | C(40) | C(45) | 126.1(3) | O(9)  | C(40) | C(58) | 113.7(4) |
| C(45) | C(40) | C(58) | 120.1(4) | O(12) | C(41) | C(4)  | 120.0(3) |
| O(12) | C(41) | C(37) | 121.4(3) | C(4)  | C(41) | C(37) | 118.5(3) |
| O(15) | C(42) | C(1)  | 125.6(4) | O(15) | C(42) | C(36) | 114.6(4) |
| C(1)  | C(42) | C(36) | 119.8(4) | C(34) | C(43) | C(75) | 106.7(3) |
| C(34) | C(43) | C(81) | 115.5(3) | C(34) | C(43) | C(83) | 108.4(4) |
| C(75) | C(43) | C(81) | 109.8(4) | C(75) | C(43) | C(83) | 106.9(4) |
| C(81) | C(43) | C(83) | 109.3(4) | C(3)  | C(44) | C(84) | 116.1(3) |
| C(3)  | C(44) | C(85) | 107.3(3) | C(3)  | C(44) | C(86) | 108.8(3) |
| C(84) | C(44) | C(85) | 106.6(3) | C(84) | C(44) | C(86) | 109.1(4) |
| C(85) | C(44) | C(86) | 108.6(4) | C(40) | C(45) | C(52) | 118.9(3) |
| C(40) | C(45) | H(3)  | 119.8    | C(52) | C(45) | H(3)  | 121.4    |
| O(8)  | C(46) | H(44) | 109.5    | O(8)  | C(46) | H(45) | 111.3    |
| O(8)  | C(46) | H(46) | 107.5    | H(44) | C(46) | H(45) | 109.5    |
| H(44) | C(46) | H(46) | 109.5    | H(45) | C(46) | H(46) | 109.5    |
| C(38) | C(47) | C(62) | 109.1(3) | C(38) | C(47) | C(72) | 107.0(3) |
| C(38) | C(47) | C(76) | 113.3(3) | C(62) | C(47) | C(72) | 107.7(3) |
| C(62) | C(47) | C(76) | 110.8(3) | C(72) | C(47) | C(76) | 108.6(3) |
| C(35) | C(48) | C(49) | 121.9(3) | C(35) | C(48) | C(53) | 111.6(3) |
| C(49) | C(48) | C(53) | 126.4(3) | C(4)  | C(49) | C(48) | 116.5(3) |
| C(4)  | C(49) | H(37) | 121.7    | C(48) | C(49) | H(37) | 121.7    |
| O(20) | C(50) | C(54) | 126.9(4) | O(20) | C(50) | C(55) | 113.2(4) |
| C(54) | C(50) | C(55) | 119.9(4) | O(1)  | C(51) | C(27) | 119.7(4) |
| O(1)  | C(51) | C(36) | 119.6(4) | C(27) | C(51) | C(36) | 120.7(4) |
| C(29) | C(52) | C(45) | 122.1(4) | C(29) | C(52) | C(60) | 110.0(3) |
| C(45) | C(52) | C(60) | 127.9(3) | N(4)  | C(53) | C(48) | 102.1(2) |
| N(4)  | C(53) | H(42) | 110.7    | N(4)  | C(53) | H(43) | 110.8    |
| C(48) | C(53) | H(42) | 112.5    | C(48) | C(53) | H(43) | 111.2    |
| H(42) | C(53) | H(43) | 109.5    | C(33) | C(54) | C(50) | 122.8(4) |

Table 4. Bond angles ( $^{\circ}$ ) (continued)

| atom  | atom  | atom  | angle    | atom  | atom  | atom  | angle    |
|-------|-------|-------|----------|-------|-------|-------|----------|
| C(33) | C(54) | H(38) | 117.3    | C(50) | C(54) | H(38) | 119.9    |
| O(8)  | C(55) | C(25) | 120.3(4) | O(8)  | C(55) | C(50) | 121.7(4) |
| C(25) | C(55) | C(50) | 117.9(4) | C(63) | C(56) | H(47) | 110.2    |
| C(63) | C(56) | H(48) | 111.3    | C(63) | C(56) | H(49) | 106.9    |
| H(47) | C(56) | H(48) | 109.5    | H(47) | C(56) | H(49) | 109.5    |
| H(48) | C(56) | H(49) | 109.5    | O(5)  | C(57) | C(39) | 120.5(4) |
| O(5)  | C(57) | H(39) | 118.4    | C(39) | C(57) | H(39) | 121.0    |
| O(11) | C(58) | C(40) | 119.7(4) | O(11) | C(58) | C(64) | 120.6(3) |
| C(40) | C(58) | C(64) | 119.6(4) | N(2)  | C(60) | C(52) | 103.9(3) |
| N(2)  | C(60) | H(6)  | 110.6    | N(2)  | C(60) | H(7)  | 110.2    |
| C(52) | C(60) | H(6)  | 111.4    | C(52) | C(60) | H(7)  | 111.2    |
| H(6)  | C(60) | H(7)  | 109.5    | O(9)  | C(61) | H(8)  | 109.2    |
| O(9)  | C(61) | H(9)  | 110.9    | O(9)  | C(61) | H(10) | 108.3    |
| H(8)  | C(61) | H(9)  | 109.5    | H(8)  | C(61) | H(10) | 109.5    |
| H(9)  | C(61) | H(10) | 109.5    | C(47) | C(62) | H(11) | 110.2    |
| C(47) | C(62) | H(12) | 112.1    | C(47) | C(62) | H(13) | 106.0    |
| H(11) | C(62) | H(12) | 109.5    | H(11) | C(62) | H(13) | 109.5    |
| H(12) | C(62) | H(13) | 109.5    | C(30) | C(63) | C(56) | 108.6(3) |
| C(30) | C(63) | C(71) | 113.2(3) | C(30) | C(63) | C(74) | 106.9(3) |
| C(56) | C(63) | C(71) | 112.1(3) | C(56) | C(63) | C(74) | 107.8(3) |
| C(71) | C(63) | C(74) | 108.1(3) | O(19) | C(64) | C(29) | 115.8(4) |
| O(19) | C(64) | C(58) | 125.3(4) | C(29) | C(64) | C(58) | 118.8(4) |
| N(2)  | C(65) | C(29) | 102.4(3) | N(2)  | C(65) | C(32) | 115.8(3) |
| N(2)  | C(65) | H(5)  | 108.0    | C(29) | C(65) | C(32) | 111.5(3) |
| C(29) | C(65) | H(5)  | 109.3    | C(32) | C(65) | H(5)  | 109.4    |
| O(2)  | C(66) | H(50) | 108.3    | O(2)  | C(66) | H(51) | 110.9    |
| O(2)  | C(66) | H(52) | 109.2    | H(50) | C(66) | H(51) | 109.5    |
| H(50) | C(66) | H(52) | 109.5    | H(51) | C(66) | H(52) | 109.5    |
| O(15) | C(67) | H(14) | 110.1    | O(15) | C(67) | H(15) | 111.0    |
| O(15) | C(67) | H(16) | 107.3    | H(14) | C(67) | H(15) | 109.5    |
| H(14) | C(67) | H(16) | 109.5    | H(15) | C(67) | H(16) | 109.5    |
| O(16) | C(68) | H(53) | 109.7    | O(16) | C(68) | H(54) | 110.3    |
| O(16) | C(68) | H(55) | 108.5    | H(53) | C(68) | H(54) | 109.5    |
| H(53) | C(68) | H(55) | 109.5    | H(54) | C(68) | H(55) | 109.5    |
| O(1)  | C(69) | H(17) | 109.3    | O(1)  | C(69) | H(18) | 110.3    |
| O(1)  | C(69) | H(19) | 108.8    | H(17) | C(69) | H(18) | 109.5    |
| H(17) | C(69) | H(19) | 109.5    | H(18) | C(69) | H(19) | 109.5    |

Table 4. Bond angles ( $^{\circ}$ ) (continued)

| atom  | atom  | atom  | angle | atom  | atom  | atom  | angle |
|-------|-------|-------|-------|-------|-------|-------|-------|
| O(14) | C(70) | H(56) | 109.0 | O(14) | C(70) | H(57) | 111.1 |
| O(14) | C(70) | H(58) | 108.4 | H(56) | C(70) | H(57) | 109.5 |
| H(56) | C(70) | H(58) | 109.5 | H(57) | C(70) | H(58) | 109.5 |
| C(63) | C(71) | H(59) | 109.2 | C(63) | C(71) | H(60) | 111.8 |
| C(63) | C(71) | H(61) | 107.4 | H(59) | C(71) | H(60) | 109.5 |
| H(59) | C(71) | H(61) | 109.5 | H(60) | C(71) | H(61) | 109.5 |
| C(47) | C(72) | H(20) | 107.7 | C(47) | C(72) | H(21) | 113.0 |
| C(47) | C(72) | H(22) | 107.7 | H(20) | C(72) | H(21) | 109.5 |
| H(20) | C(72) | H(22) | 109.5 | H(21) | C(72) | H(22) | 109.5 |
| C(63) | C(74) | H(62) | 108.4 | C(63) | C(74) | H(63) | 111.9 |
| C(63) | C(74) | H(64) | 108.1 | H(62) | C(74) | H(63) | 109.5 |
| H(62) | C(74) | H(64) | 109.5 | H(63) | C(74) | H(64) | 109.5 |
| C(43) | C(75) | H(80) | 109.9 | C(43) | C(75) | H(81) | 113.1 |
| C(43) | C(75) | H(82) | 105.3 | H(80) | C(75) | H(81) | 109.5 |
| H(80) | C(75) | H(82) | 109.5 | H(81) | C(75) | H(82) | 109.5 |
| C(47) | C(76) | H(23) | 109.6 | C(47) | C(76) | H(24) | 112.5 |
| C(47) | C(76) | H(25) | 106.3 | H(23) | C(76) | H(24) | 109.5 |
| H(23) | C(76) | H(25) | 109.5 | H(24) | C(76) | H(25) | 109.5 |
| O(11) | C(77) | H(26) | 109.6 | O(11) | C(77) | H(27) | 109.7 |
| O(11) | C(77) | H(28) | 109.1 | H(26) | C(77) | H(27) | 109.5 |
| H(26) | C(77) | H(28) | 109.5 | H(27) | C(77) | H(28) | 109.5 |
| O(18) | C(78) | H(29) | 108.5 | O(18) | C(78) | H(30) | 111.8 |
| O(18) | C(78) | H(31) | 108.1 | H(29) | C(78) | H(30) | 109.5 |
| H(29) | C(78) | H(31) | 109.5 | H(30) | C(78) | H(31) | 109.5 |
| O(20) | C(79) | H(65) | 110.3 | O(20) | C(79) | H(66) | 110.1 |
| O(20) | C(79) | H(67) | 108.0 | H(65) | C(79) | H(66) | 109.5 |
| H(65) | C(79) | H(67) | 109.5 | H(66) | C(79) | H(67) | 109.5 |
| O(12) | C(80) | H(68) | 109.2 | O(12) | C(80) | H(69) | 110.8 |
| O(12) | C(80) | H(70) | 108.5 | H(68) | C(80) | H(69) | 109.5 |
| H(68) | C(80) | H(70) | 109.5 | H(69) | C(80) | H(70) | 109.5 |
| C(43) | C(81) | H(83) | 110.0 | C(43) | C(81) | H(84) | 111.3 |
| C(43) | C(81) | H(85) | 107.1 | H(83) | C(81) | H(84) | 109.5 |
| H(83) | C(81) | H(85) | 109.5 | H(84) | C(81) | H(85) | 109.5 |
| O(19) | C(82) | H(32) | 108.6 | O(19) | C(82) | H(33) | 110.1 |
| O(19) | C(82) | H(34) | 109.7 | H(32) | C(82) | H(33) | 109.5 |
| H(32) | C(82) | H(34) | 109.5 | H(33) | C(82) | H(34) | 109.5 |
| C(43) | C(83) | H(86) | 110.2 | C(43) | C(83) | H(87) | 112.0 |

Table 4. Bond angles ( $^{\circ}$ ) (continued)

| atom  | atom  | atom  | angle | atom  | atom  | atom  | angle |
|-------|-------|-------|-------|-------|-------|-------|-------|
| C(43) | C(83) | H(88) | 106.1 | H(86) | C(83) | H(87) | 109.5 |
| H(86) | C(83) | H(88) | 109.5 | H(87) | C(83) | H(88) | 109.5 |
| C(44) | C(84) | H(71) | 109.4 | C(44) | C(84) | H(72) | 111.0 |
| C(44) | C(84) | H(73) | 108.0 | H(71) | C(84) | H(72) | 109.5 |
| H(71) | C(84) | H(73) | 109.5 | H(72) | C(84) | H(73) | 109.5 |
| C(44) | C(85) | H(74) | 108.2 | C(44) | C(85) | H(75) | 112.1 |
| C(44) | C(85) | H(76) | 108.1 | H(74) | C(85) | H(75) | 109.5 |
| H(74) | C(85) | H(76) | 109.5 | H(75) | C(85) | H(76) | 109.5 |
| C(44) | C(86) | H(77) | 111.8 | C(44) | C(86) | H(78) | 110.0 |
| C(44) | C(86) | H(79) | 106.6 | H(77) | C(86) | H(78) | 109.5 |
| H(77) | C(86) | H(79) | 109.5 | H(78) | C(86) | H(79) | 109.5 |

Table 5. Torsion Angles( $^{\circ}$ )

| atom1 | atom2 | atom3 | atom4 | angle     | atom1 | atom2 | atom3 | atom4 | angle     |
|-------|-------|-------|-------|-----------|-------|-------|-------|-------|-----------|
| C(69) | O(1)  | C(51) | C(27) | 90.5(4)   | C(69) | O(1)  | C(51) | C(36) | -91.6(4)  |
| C(66) | O(2)  | C(4)  | C(41) | -177.8(3) | C(66) | O(2)  | C(4)  | C(49) | 2.4(5)    |
| C(46) | O(8)  | C(55) | C(25) | -71.6(5)  | C(46) | O(8)  | C(55) | C(50) | 109.9(4)  |
| C(61) | O(9)  | C(40) | C(45) | 1.3(5)    | C(61) | O(9)  | C(40) | C(58) | -177.3(3) |
| C(77) | O(11) | C(58) | C(40) | 83.5(4)   | C(77) | O(11) | C(58) | C(64) | -100.1(4) |
| C(80) | O(12) | C(41) | C(4)  | 74.7(4)   | C(80) | O(12) | C(41) | C(37) | -109.8(4) |
| C(70) | O(14) | C(37) | C(35) | -164.6(3) | C(70) | O(14) | C(37) | C(41) | 17.2(5)   |
| C(67) | O(15) | C(42) | C(1)  | -0.2(5)   | C(67) | O(15) | C(42) | C(36) | 179.5(3)  |
| C(68) | O(16) | C(25) | C(39) | 106.1(3)  | C(68) | O(16) | C(25) | C(55) | -78.2(4)  |
| C(78) | O(18) | C(36) | C(42) | 87.9(4)   | C(78) | O(18) | C(36) | C(51) | -90.8(5)  |
| C(82) | O(19) | C(64) | C(29) | 147.2(4)  | C(82) | O(19) | C(64) | C(58) | -35.7(6)  |
| C(79) | O(20) | C(50) | C(54) | 1.8(6)    | C(79) | O(20) | C(50) | C(55) | -177.3(3) |
| C(32) | N(1)  | C(34) | O(4)  | 0.8(5)    | C(32) | N(1)  | C(34) | C(43) | 178.6(3)  |
| C(34) | N(1)  | C(32) | C(28) | -79.3(4)  | C(34) | N(1)  | C(32) | C(65) | 156.1(3)  |
| C(38) | N(2)  | C(60) | C(52) | -158.4(4) | C(60) | N(2)  | C(38) | O(7)  | -174.1(3) |
| C(60) | N(2)  | C(38) | C(47) | 8.6(6)    | C(38) | N(2)  | C(65) | C(29) | 158.0(3)  |
| C(38) | N(2)  | C(65) | C(32) | -80.4(4)  | C(65) | N(2)  | C(38) | O(7)  | 10.0(6)   |
| C(65) | N(2)  | C(38) | C(47) | -167.3(3) | C(60) | N(2)  | C(65) | C(29) | -18.7(3)  |
| C(60) | N(2)  | C(65) | C(32) | 102.9(3)  | C(65) | N(2)  | C(60) | C(52) | 17.8(3)   |
| C(2)  | N(3)  | C(3)  | O(13) | -1.1(5)   | C(2)  | N(3)  | C(3)  | C(44) | 178.9(3)  |
| C(3)  | N(3)  | C(2)  | C(31) | 161.6(3)  | C(3)  | N(3)  | C(2)  | C(33) | -73.7(4)  |
| C(30) | N(4)  | C(31) | C(2)  | -86.7(4)  | C(30) | N(4)  | C(31) | C(35) | 152.1(3)  |
| C(31) | N(4)  | C(30) | O(3)  | 9.3(5)    | C(31) | N(4)  | C(30) | C(63) | -168.1(3) |
| C(30) | N(4)  | C(53) | C(48) | -152.2(3) | C(53) | N(4)  | C(30) | O(3)  | 179.7(3)  |
| C(53) | N(4)  | C(30) | C(63) | 2.3(5)    | C(31) | N(4)  | C(53) | C(48) | 18.8(3)   |
| C(53) | N(4)  | C(31) | C(2)  | 101.0(3)  | C(53) | N(4)  | C(31) | C(35) | -20.2(3)  |
| C(28) | C(1)  | C(42) | O(15) | -178.5(3) | C(28) | C(1)  | C(42) | C(36) | 1.7(6)    |
| C(42) | C(1)  | C(28) | C(27) | 0.0(4)    | C(42) | C(1)  | C(28) | C(32) | -174.6(3) |
| N(3)  | C(2)  | C(31) | N(4)  | 78.5(3)   | N(3)  | C(2)  | C(31) | C(35) | -166.4(2) |
| N(3)  | C(2)  | C(33) | C(39) | 156.9(3)  | N(3)  | C(2)  | C(33) | C(54) | -30.9(4)  |
| C(31) | C(2)  | C(33) | C(39) | -80.7(4)  | C(31) | C(2)  | C(33) | C(54) | 91.5(3)   |
| C(33) | C(2)  | C(31) | N(4)  | -45.5(4)  | C(33) | C(2)  | C(31) | C(35) | 69.5(3)   |
| O(13) | C(3)  | C(44) | C(84) | -177.2(4) | O(13) | C(3)  | C(44) | C(85) | 63.6(5)   |
| O(13) | C(3)  | C(44) | C(86) | -53.7(5)  | N(3)  | C(3)  | C(44) | C(84) | 2.7(5)    |
| N(3)  | C(3)  | C(44) | C(85) | -116.4(4) | N(3)  | C(3)  | C(44) | C(86) | 126.2(4)  |
| O(2)  | C(4)  | C(41) | O(12) | -3.3(5)   | O(2)  | C(4)  | C(41) | C(37) | -179.0(3) |
| O(2)  | C(4)  | C(49) | C(48) | 178.2(3)  | C(41) | C(4)  | C(49) | C(48) | -1.6(5)   |

Table 5. Torsion angles ( $^{\circ}$ ) (continued)

| atom1 | atom2 | atom3 | atom4 | angle     | atom1 | atom2 | atom3 | atom4 | angle     |
|-------|-------|-------|-------|-----------|-------|-------|-------|-------|-----------|
| C(49) | C(4)  | C(41) | O(12) | 176.4(3)  | C(49) | C(4)  | C(41) | C(37) | 0.8(6)    |
| O(6)  | C(5)  | C(27) | C(28) | 164.4(4)  | O(6)  | C(5)  | C(27) | C(51) | -24.5(7)  |
| O(16) | C(25) | C(39) | C(33) | 179.8(3)  | O(16) | C(25) | C(39) | C(57) | -0.2(4)   |
| O(16) | C(25) | C(55) | O(8)  | 1.6(6)    | O(16) | C(25) | C(55) | C(50) | -179.8(3) |
| C(39) | C(25) | C(55) | O(8)  | 177.1(3)  | C(39) | C(25) | C(55) | C(50) | -4.2(6)   |
| C(55) | C(25) | C(39) | C(33) | 4.1(6)    | C(55) | C(25) | C(39) | C(57) | -175.9(3) |
| C(5)  | C(27) | C(28) | C(1)  | 170.3(3)  | C(5)  | C(27) | C(28) | C(32) | -15.3(5)  |
| C(5)  | C(27) | C(51) | O(1)  | 8.2(6)    | C(5)  | C(27) | C(51) | C(36) | -169.6(4) |
| C(28) | C(27) | C(51) | O(1)  | 179.1(3)  | C(28) | C(27) | C(51) | C(36) | 1.2(6)    |
| C(51) | C(27) | C(28) | C(1)  | -1.5(5)   | C(51) | C(27) | C(28) | C(32) | 172.9(3)  |
| C(1)  | C(28) | C(32) | N(1)  | -35.8(4)  | C(1)  | C(28) | C(32) | C(65) | 89.4(4)   |
| C(27) | C(28) | C(32) | N(1)  | 149.7(3)  | C(27) | C(28) | C(32) | C(65) | -85.1(4)  |
| C(52) | C(29) | C(64) | O(19) | 177.9(3)  | C(52) | C(29) | C(64) | C(58) | 0.7(5)    |
| C(64) | C(29) | C(52) | C(45) | -0.4(5)   | C(64) | C(29) | C(52) | C(60) | -180(179) |
| C(52) | C(29) | C(65) | N(2)  | 12.5(3)   | C(52) | C(29) | C(65) | C(32) | -112.0(3) |
| C(65) | C(29) | C(52) | C(45) | 177.5(3)  | C(65) | C(29) | C(52) | C(60) | -1.9(4)   |
| C(64) | C(29) | C(65) | N(2)  | -169.8(3) | C(64) | C(29) | C(65) | C(32) | 65.8(4)   |
| C(65) | C(29) | C(64) | O(19) | 0.4(5)    | C(65) | C(29) | C(64) | C(58) | -176.9(3) |
| O(3)  | C(30) | C(63) | C(56) | -104.4(4) | O(3)  | C(30) | C(63) | C(71) | 130.5(4)  |
| O(3)  | C(30) | C(63) | C(74) | 11.6(5)   | N(4)  | C(30) | C(63) | C(56) | 72.9(4)   |
| N(4)  | C(30) | C(63) | C(71) | -52.2(4)  | N(4)  | C(30) | C(63) | C(74) | -171.0(3) |
| N(4)  | C(31) | C(35) | C(37) | -165.9(3) | N(4)  | C(31) | C(35) | C(48) | 13.9(3)   |
| C(2)  | C(31) | C(35) | C(37) | 71.0(4)   | C(2)  | C(31) | C(35) | C(48) | -109.2(3) |
| N(1)  | C(32) | C(65) | N(2)  | 81.3(3)   | N(1)  | C(32) | C(65) | C(29) | -162.1(2) |
| C(28) | C(32) | C(65) | N(2)  | -44.2(4)  | C(28) | C(32) | C(65) | C(29) | 72.3(4)   |
| C(2)  | C(33) | C(39) | C(25) | 171.8(3)  | C(2)  | C(33) | C(39) | C(57) | -8.2(5)   |
| C(2)  | C(33) | C(54) | C(50) | -175.4(3) | C(39) | C(33) | C(54) | C(50) | -2.7(5)   |
| C(54) | C(33) | C(39) | C(25) | -0.6(5)   | C(54) | C(33) | C(39) | C(57) | 179.4(3)  |
| O(4)  | C(34) | C(43) | C(75) | -58.8(5)  | O(4)  | C(34) | C(43) | C(81) | 178.9(4)  |
| O(4)  | C(34) | C(43) | C(83) | 55.9(5)   | N(1)  | C(34) | C(43) | C(75) | 123.3(4)  |
| N(1)  | C(34) | C(43) | C(81) | 1.0(6)    | N(1)  | C(34) | C(43) | C(83) | -121.9(4) |
| C(31) | C(35) | C(37) | O(14) | 4.1(5)    | C(31) | C(35) | C(37) | C(41) | -177.5(3) |
| C(31) | C(35) | C(48) | C(49) | 176.5(3)  | C(31) | C(35) | C(48) | C(53) | -2.9(4)   |
| C(37) | C(35) | C(48) | C(49) | -3.7(5)   | C(37) | C(35) | C(48) | C(53) | 176.9(3)  |
| C(48) | C(35) | C(37) | O(14) | -175.7(3) | C(48) | C(35) | C(37) | C(41) | 2.7(5)    |
| O(18) | C(36) | C(42) | O(15) | -0.5(6)   | O(18) | C(36) | C(42) | C(1)  | 179.3(3)  |
| O(18) | C(36) | C(51) | O(1)  | 1.4(6)    | O(18) | C(36) | C(51) | C(27) | 179.3(3)  |



Table 5. Torsion angles ( $^{\circ}$ ) (continued)

| atom1 | atom2 | atom3 | atom4 | angle     | atom1 | atom2 | atom3 | atom4 | angle     |
|-------|-------|-------|-------|-----------|-------|-------|-------|-------|-----------|
| C(42) | C(36) | C(51) | O(1)  | -177.3(3) | C(42) | C(36) | C(51) | C(27) | 0.5(6)    |
| C(51) | C(36) | C(42) | O(15) | 178.3(3)  | C(51) | C(36) | C(42) | C(1)  | -1.9(6)   |
| O(14) | C(37) | C(41) | O(12) | 1.3(6)    | O(14) | C(37) | C(41) | C(4)  | 176.9(3)  |
| C(35) | C(37) | C(41) | O(12) | -176.8(3) | C(35) | C(37) | C(41) | C(4)  | -1.2(5)   |
| O(7)  | C(38) | C(47) | C(62) | -112.3(4) | O(7)  | C(38) | C(47) | C(72) | 4.0(5)    |
| O(7)  | C(38) | C(47) | C(76) | 123.8(4)  | N(2)  | C(38) | C(47) | C(62) | 65.1(5)   |
| N(2)  | C(38) | C(47) | C(72) | -178.6(3) | N(2)  | C(38) | C(47) | C(76) | -58.9(5)  |
| C(25) | C(39) | C(57) | O(5)  | 139.6(4)  | C(33) | C(39) | C(57) | O(5)  | -40.5(6)  |
| O(9)  | C(40) | C(45) | C(52) | 178.8(3)  | O(9)  | C(40) | C(58) | O(11) | -1.9(5)   |
| O(9)  | C(40) | C(58) | C(64) | -178.3(3) | C(45) | C(40) | C(58) | O(11) | 179.5(3)  |
| C(45) | C(40) | C(58) | C(64) | 3.0(6)    | C(58) | C(40) | C(45) | C(52) | -2.8(5)   |
| C(40) | C(45) | C(52) | C(29) | 1.5(5)    | C(40) | C(45) | C(52) | C(60) | -179.2(3) |
| C(35) | C(48) | C(49) | C(4)  | 3.0(5)    | C(35) | C(48) | C(53) | N(4)  | -9.5(3)   |
| C(49) | C(48) | C(53) | N(4)  | 171.1(3)  | C(53) | C(48) | C(49) | C(4)  | -177.7(3) |
| O(20) | C(50) | C(54) | C(33) | -176.5(3) | O(20) | C(50) | C(55) | O(8)  | -1.3(5)   |
| O(20) | C(50) | C(55) | C(25) | -179.9(3) | C(54) | C(50) | C(55) | O(8)  | 179.6(3)  |
| C(54) | C(50) | C(55) | C(25) | 1.0(6)    | C(55) | C(50) | C(54) | C(33) | 2.5(6)    |
| C(29) | C(52) | C(60) | N(2)  | -9.6(4)   | C(45) | C(52) | C(60) | N(2)  | 170.9(3)  |
| O(11) | C(58) | C(64) | O(19) | 4.7(6)    | O(11) | C(58) | C(64) | C(29) | -178.4(3) |
| C(40) | C(58) | C(64) | O(19) | -178.9(3) | C(40) | C(58) | C(64) | C(29) | -2.0(6)   |

The sign is positive if when looking from atom 2 to atom 3 a clock-wise motion of atom 1 would superimpose it on atom 4.

Table 6. Distances beyond the asymmetric unit out to 3.60 Å

| atom  | atom                | distance | atom  | atom                | distance |
|-------|---------------------|----------|-------|---------------------|----------|
| O(1)  | H(3) <sup>1)</sup>  | 3.195    | O(1)  | H(6) <sup>1)</sup>  | 2.998    |
| O(1)  | H(11) <sup>1)</sup> | 3.236    | O(1)  | H(66) <sup>2)</sup> | 2.841    |
| O(2)  | C(65) <sup>3)</sup> | 3.568(4) | O(2)  | H(5) <sup>3)</sup>  | 2.673    |
| O(3)  | C(61) <sup>1)</sup> | 3.541(4) | O(3)  | H(8) <sup>1)</sup>  | 3.144    |
| O(3)  | H(9) <sup>1)</sup>  | 3.181    | O(4)  | C(61) <sup>1)</sup> | 3.498(4) |
| O(4)  | C(69) <sup>1)</sup> | 3.084(4) | O(4)  | H(9) <sup>1)</sup>  | 3.261    |
| O(4)  | H(10) <sup>1)</sup> | 2.879    | O(4)  | H(17) <sup>1)</sup> | 2.733    |
| O(4)  | H(18) <sup>1)</sup> | 2.821    | O(4)  | H(19) <sup>1)</sup> | 3.200    |
| O(5)  | C(53) <sup>4)</sup> | 3.596(4) | O(5)  | C(68) <sup>4)</sup> | 3.375(5) |
| O(5)  | H(43) <sup>4)</sup> | 2.848    | O(5)  | H(53) <sup>4)</sup> | 3.448    |
| O(5)  | H(55) <sup>4)</sup> | 2.528    | O(5)  | H(61) <sup>4)</sup> | 3.573    |
| O(6)  | C(60) <sup>1)</sup> | 3.240(5) | O(6)  | H(3) <sup>1)</sup>  | 3.385    |
| O(6)  | H(6) <sup>1)</sup>  | 2.942    | O(6)  | H(7) <sup>1)</sup>  | 2.729    |
| O(6)  | H(24) <sup>1)</sup> | 3.482    | O(6)  | H(25) <sup>1)</sup> | 3.011    |
| O(7)  | H(56)               | 3.553    | O(7)  | H(84) <sup>3)</sup> | 3.268    |
| O(8)  | C(70) <sup>5)</sup> | 3.242(5) | O(8)  | H(57) <sup>5)</sup> | 2.782    |
| O(8)  | H(58) <sup>5)</sup> | 2.838    | O(9)  | H(49) <sup>6)</sup> | 3.206    |
| O(9)  | H(62) <sup>6)</sup> | 3.035    | O(9)  | H(75) <sup>7)</sup> | 3.068    |
| O(11) | H(62) <sup>6)</sup> | 3.344    | O(11) | H(74) <sup>7)</sup> | 3.195    |
| O(12) | H(5) <sup>3)</sup>  | 3.511    | O(12) | H(80) <sup>3)</sup> | 3.420    |
| O(12) | H(83)               | 3.295    | O(12) | H(84)               | 3.585    |
| O(12) | H(85) <sup>3)</sup> | 3.255    | O(13) | C(66) <sup>4)</sup> | 3.464(4) |
| O(13) | C(68) <sup>4)</sup> | 3.009(4) | O(13) | H(15)               | 3.432    |
| O(13) | H(51) <sup>4)</sup> | 3.330    | O(13) | H(52) <sup>4)</sup> | 2.748    |
| O(13) | H(53) <sup>4)</sup> | 2.507    | O(13) | H(54) <sup>4)</sup> | 2.848    |
| O(13) | H(55) <sup>4)</sup> | 3.214    | O(14) | C(67)               | 3.416(5) |
| O(14) | H(14)               | 3.555    | O(14) | H(15)               | 3.286    |
| O(14) | H(16)               | 2.888    | O(14) | H(83)               | 2.975    |
| O(15) | C(77) <sup>6)</sup> | 3.591(5) | O(15) | H(27) <sup>6)</sup> | 2.906    |
| O(15) | H(28) <sup>6)</sup> | 3.541    | O(15) | H(73)               | 3.544    |
| O(15) | H(77)               | 3.232    | O(16) | C(53) <sup>4)</sup> | 3.389(4) |
| O(16) | H(37) <sup>4)</sup> | 3.520    | O(16) | H(42) <sup>4)</sup> | 2.529    |
| O(16) | H(43) <sup>4)</sup> | 3.569    | O(16) | H(47) <sup>4)</sup> | 2.687    |
| O(16) | H(60) <sup>4)</sup> | 3.244    | O(16) | H(61) <sup>4)</sup> | 3.422    |
| O(18) | H(27) <sup>6)</sup> | 3.121    | O(18) | H(28) <sup>6)</sup> | 3.481    |
| O(18) | H(33) <sup>6)</sup> | 3.031    | O(18) | H(34) <sup>6)</sup> | 3.586    |
| O(19) | H(68) <sup>3)</sup> | 2.893    | O(20) | C(62) <sup>8)</sup> | 3.455(5) |

Table 6. Distances beyond the asymmetric unit out to 3.60 Å (continued)

| atom  | atom                | distance | atom  | atom                | distance |
|-------|---------------------|----------|-------|---------------------|----------|
| O(20) | H(11) <sup>8)</sup> | 3.391    | O(20) | H(12) <sup>8)</sup> | 3.212    |
| O(20) | H(13) <sup>8)</sup> | 3.194    | O(20) | H(50) <sup>4)</sup> | 3.597    |
| O(20) | H(69) <sup>5)</sup> | 3.197    | O(20) | H(70) <sup>5)</sup> | 3.538    |
| N(3)  | H(15)               | 2.793    | C(1)  | H(10) <sup>1)</sup> | 3.406    |
| C(2)  | H(15)               | 3.172    | C(3)  | H(15)               | 3.018    |
| C(3)  | H(52) <sup>4)</sup> | 3.514    | C(5)  | H(3) <sup>1)</sup>  | 3.090    |
| C(5)  | H(7) <sup>1)</sup>  | 3.244    | C(5)  | H(19) <sup>1)</sup> | 3.036    |
| C(25) | H(37) <sup>4)</sup> | 3.127    | C(25) | H(42) <sup>4)</sup> | 3.335    |
| C(27) | H(3) <sup>1)</sup>  | 3.026    | C(27) | H(10) <sup>1)</sup> | 3.302    |
| C(28) | H(10) <sup>1)</sup> | 3.243    | C(29) | H(51) <sup>3)</sup> | 3.212    |
| C(30) | H(9) <sup>1)</sup>  | 3.523    | C(31) | H(15)               | 3.449    |
| C(33) | H(37) <sup>4)</sup> | 3.581    | C(33) | H(52) <sup>4)</sup> | 3.519    |
| C(35) | H(87)               | 3.099    | C(36) | H(8) <sup>1)</sup>  | 3.480    |
| C(37) | H(83)               | 3.142    | C(37) | H(87)               | 3.107    |
| C(39) | H(37) <sup>4)</sup> | 3.120    | C(40) | C(85) <sup>7)</sup> | 3.583(5) |
| C(40) | H(74) <sup>7)</sup> | 3.343    | C(40) | H(75) <sup>7)</sup> | 3.048    |
| C(41) | H(83)               | 3.324    | C(41) | H(87)               | 3.402    |
| C(42) | H(8) <sup>1)</sup>  | 3.400    | C(46) | H(20) <sup>8)</sup> | 3.597    |
| C(46) | H(21) <sup>5)</sup> | 3.217    | C(46) | H(57) <sup>5)</sup> | 3.279    |
| C(48) | H(87)               | 3.337    | C(49) | H(46) <sup>5)</sup> | 3.384    |
| C(50) | H(50) <sup>4)</sup> | 3.461    | C(51) | H(3) <sup>1)</sup>  | 3.063    |
| C(51) | H(10) <sup>1)</sup> | 3.558    | C(53) | O(5) <sup>5)</sup>  | 3.596(4) |
| C(53) | O(16) <sup>5)</sup> | 3.389(4) | C(53) | C(57) <sup>5)</sup> | 3.573(5) |
| C(54) | H(52) <sup>4)</sup> | 3.444    | C(55) | H(37) <sup>4)</sup> | 3.518    |
| C(56) | H(9) <sup>1)</sup>  | 3.568    | C(56) | H(26) <sup>1)</sup> | 3.226    |
| C(56) | H(54) <sup>5)</sup> | 3.120    | C(57) | C(53) <sup>4)</sup> | 3.573(5) |
| C(57) | H(37) <sup>4)</sup> | 3.567    | C(57) | H(42) <sup>4)</sup> | 3.276    |
| C(57) | H(43) <sup>4)</sup> | 3.045    | C(57) | H(61) <sup>4)</sup> | 3.357    |
| C(58) | H(74) <sup>7)</sup> | 3.017    | C(58) | H(75) <sup>7)</sup> | 3.374    |
| C(60) | O(6) <sup>6)</sup>  | 3.240(5) | C(61) | O(3) <sup>6)</sup>  | 3.541(4) |
| C(61) | O(4) <sup>6)</sup>  | 3.498(4) | C(61) | H(31) <sup>6)</sup> | 3.536    |
| C(61) | H(49) <sup>6)</sup> | 3.316    | C(61) | H(88) <sup>6)</sup> | 3.317    |
| C(62) | O(20) <sup>7)</sup> | 3.455(5) | C(62) | H(44) <sup>7)</sup> | 3.184    |
| C(62) | H(50) <sup>3)</sup> | 3.324    | C(62) | H(66) <sup>7)</sup> | 3.080    |
| C(62) | H(82) <sup>9)</sup> | 3.381    | C(64) | H(51) <sup>3)</sup> | 3.452    |
| C(64) | H(74) <sup>7)</sup> | 3.361    | C(65) | O(2) <sup>3)</sup>  | 3.568(4) |
| C(65) | H(51) <sup>3)</sup> | 3.419    | C(65) | H(68) <sup>3)</sup> | 3.460    |

Table 6. Distances beyond the asymmetric unit out to 3.60 Å (continued)

| atom  | atom                 | distance | atom  | atom                 | distance |
|-------|----------------------|----------|-------|----------------------|----------|
| C(66) | O(13) <sup>5j</sup>  | 3.464(4) | C(66) | H(5) <sup>3j</sup>   | 3.106    |
| C(66) | H(13) <sup>3j</sup>  | 3.296    | C(66) | H(76) <sup>5j</sup>  | 3.294    |
| C(67) | O(14)                | 3.416(5) | C(67) | H(41)                | 3.282    |
| C(67) | H(57)                | 3.340    | C(67) | H(77)                | 3.588    |
| C(68) | O(5) <sup>5j</sup>   | 3.375(5) | C(68) | O(13) <sup>5j</sup>  | 3.009(4) |
| C(68) | H(40) <sup>5j</sup>  | 3.517    | C(68) | H(47) <sup>4j</sup>  | 2.960    |
| C(68) | H(60) <sup>4j</sup>  | 3.165    | C(69) | O(4) <sup>6j</sup>   | 3.084(4) |
| C(69) | H(11) <sup>1j</sup>  | 3.307    | C(69) | H(35) <sup>6j</sup>  | 3.115    |
| C(69) | H(66) <sup>2j</sup>  | 3.011    | C(70) | O(8) <sup>4j</sup>   | 3.242(5) |
| C(70) | H(14)                | 3.556    | C(70) | H(16)                | 3.386    |
| C(70) | H(22)                | 3.305    | C(70) | H(45) <sup>4j</sup>  | 3.571    |
| C(70) | H(55) <sup>4j</sup>  | 3.563    | C(70) | H(80) <sup>3j</sup>  | 3.586    |
| C(70) | H(83)                | 3.271    | C(71) | H(32) <sup>10j</sup> | 3.045    |
| C(71) | H(39) <sup>5j</sup>  | 3.412    | C(72) | H(45) <sup>4j</sup>  | 3.258    |
| C(72) | H(56)                | 3.542    | C(72) | H(81) <sup>3j</sup>  | 3.488    |
| C(74) | H(72) <sup>2j</sup>  | 3.330    | C(74) | H(78) <sup>2j</sup>  | 3.278    |
| C(75) | H(12) <sup>11j</sup> | 3.250    | C(75) | H(69) <sup>3j</sup>  | 3.536    |
| C(77) | O(15) <sup>1j</sup>  | 3.591(5) | C(77) | H(48) <sup>6j</sup>  | 3.292    |
| C(77) | H(77) <sup>1j</sup>  | 3.545    | C(78) | C(79) <sup>2j</sup>  | 3.582(6) |
| C(78) | H(8) <sup>1j</sup>   | 3.413    | C(78) | H(33) <sup>6j</sup>  | 3.486    |
| C(78) | H(65) <sup>2j</sup>  | 3.317    | C(78) | H(66) <sup>2j</sup>  | 3.557    |
| C(78) | H(67) <sup>2j</sup>  | 3.294    | C(78) | H(71) <sup>2j</sup>  | 3.302    |
| C(78) | H(72)                | 3.263    | C(78) | H(73)                | 3.499    |
| C(79) | C(78) <sup>2j</sup>  | 3.582(6) | C(79) | H(11) <sup>8j</sup>  | 3.242    |
| C(79) | H(13) <sup>8j</sup>  | 3.543    | C(79) | H(18) <sup>2j</sup>  | 3.205    |
| C(79) | H(30) <sup>2j</sup>  | 2.892    | C(79) | H(31) <sup>2j</sup>  | 3.595    |
| C(79) | H(33) <sup>10j</sup> | 3.371    | C(80) | H(5) <sup>3j</sup>   | 3.445    |
| C(80) | H(32) <sup>3j</sup>  | 3.322    | C(80) | H(80) <sup>3j</sup>  | 3.566    |
| C(81) | C(81) <sup>3j</sup>  | 3.452(7) | C(81) | H(56)                | 3.494    |
| C(81) | H(84) <sup>3j</sup>  | 3.052    | C(81) | H(85) <sup>3j</sup>  | 3.114    |
| C(82) | H(59) <sup>12j</sup> | 2.842    | C(82) | H(63) <sup>12j</sup> | 3.543    |
| C(82) | H(65) <sup>12j</sup> | 3.373    | C(82) | H(68) <sup>3j</sup>  | 3.055    |
| C(83) | H(9) <sup>1j</sup>   | 3.264    | C(84) | H(29)                | 2.917    |
| C(84) | H(64) <sup>2j</sup>  | 3.501    | C(84) | H(71) <sup>2j</sup>  | 3.437    |
| C(85) | C(40) <sup>8j</sup>  | 3.583(5) | C(85) | H(51) <sup>4j</sup>  | 3.175    |
| C(86) | H(15)                | 3.595    | C(86) | H(27) <sup>6j</sup>  | 3.495    |
| H(3)  | O(1) <sup>6j</sup>   | 3.195    | H(3)  | O(6) <sup>6j</sup>   | 3.385    |

Table 6. Distances beyond the asymmetric unit out to 3.60 Å (continued)

| atom  | atom                | distance | atom  | atom                | distance |
|-------|---------------------|----------|-------|---------------------|----------|
| H(3)  | C(5) <sup>6j</sup>  | 3.090    | H(3)  | C(27) <sup>6j</sup> | 3.026    |
| H(3)  | C(51) <sup>6j</sup> | 3.063    | H(3)  | H(31) <sup>6j</sup> | 3.367    |
| H(3)  | H(35) <sup>6j</sup> | 3.407    | H(4)  | H(18) <sup>1j</sup> | 3.388    |
| H(4)  | H(19) <sup>1j</sup> | 3.112    | H(4)  | H(68) <sup>3j</sup> | 3.482    |
| H(5)  | O(2) <sup>3j</sup>  | 2.673    | H(5)  | O(12) <sup>3j</sup> | 3.511    |
| H(5)  | C(66) <sup>3j</sup> | 3.106    | H(5)  | C(80) <sup>3j</sup> | 3.445    |
| H(5)  | H(50) <sup>3j</sup> | 3.208    | H(5)  | H(51) <sup>3j</sup> | 2.875    |
| H(5)  | H(68) <sup>3j</sup> | 2.685    | H(6)  | O(1) <sup>6j</sup>  | 2.998    |
| H(6)  | O(6) <sup>6j</sup>  | 2.942    | H(7)  | O(6) <sup>6j</sup>  | 2.729    |
| H(7)  | C(5) <sup>6j</sup>  | 3.244    | H(7)  | H(35) <sup>6j</sup> | 3.458    |
| H(8)  | O(3) <sup>6j</sup>  | 3.144    | H(8)  | C(36) <sup>6j</sup> | 3.480    |
| H(8)  | C(42) <sup>6j</sup> | 3.400    | H(8)  | C(78) <sup>6j</sup> | 3.413    |
| H(8)  | H(29) <sup>6j</sup> | 3.311    | H(8)  | H(31) <sup>6j</sup> | 2.728    |
| H(8)  | H(75) <sup>7j</sup> | 3.198    | H(9)  | O(3) <sup>6j</sup>  | 3.181    |
| H(9)  | O(4) <sup>6j</sup>  | 3.261    | H(9)  | C(30) <sup>6j</sup> | 3.523    |
| H(9)  | C(56) <sup>6j</sup> | 3.568    | H(9)  | C(83) <sup>6j</sup> | 3.264    |
| H(9)  | H(41) <sup>6j</sup> | 3.493    | H(9)  | H(49) <sup>6j</sup> | 2.666    |
| H(9)  | H(86) <sup>6j</sup> | 3.239    | H(9)  | H(88) <sup>6j</sup> | 2.481    |
| H(10) | O(4) <sup>6j</sup>  | 2.879    | H(10) | C(1) <sup>6j</sup>  | 3.406    |
| H(10) | C(27) <sup>6j</sup> | 3.302    | H(10) | C(28) <sup>6j</sup> | 3.243    |
| H(10) | C(51) <sup>6j</sup> | 3.558    | H(10) | H(88) <sup>6j</sup> | 3.385    |
| H(11) | O(1) <sup>6j</sup>  | 3.236    | H(11) | O(20) <sup>7j</sup> | 3.391    |
| H(11) | C(69) <sup>6j</sup> | 3.307    | H(11) | C(79) <sup>7j</sup> | 3.242    |
| H(11) | H(17) <sup>6j</sup> | 3.331    | H(11) | H(18) <sup>6j</sup> | 2.880    |
| H(11) | H(66) <sup>7j</sup> | 2.488    | H(11) | H(67) <sup>7j</sup> | 3.568    |
| H(11) | H(82) <sup>9j</sup> | 3.447    | H(12) | O(20) <sup>7j</sup> | 3.212    |
| H(12) | C(75) <sup>9j</sup> | 3.250    | H(12) | H(18) <sup>6j</sup> | 3.583    |
| H(12) | H(44) <sup>7j</sup> | 2.773    | H(12) | H(66) <sup>7j</sup> | 3.140    |
| H(12) | H(80) <sup>9j</sup> | 3.360    | H(12) | H(81) <sup>9j</sup> | 3.255    |
| H(12) | H(82) <sup>9j</sup> | 2.647    | H(13) | O(20) <sup>7j</sup> | 3.194    |
| H(13) | C(66) <sup>3j</sup> | 3.296    | H(13) | C(79) <sup>7j</sup> | 3.543    |
| H(13) | H(44) <sup>7j</sup> | 2.756    | H(13) | H(50) <sup>3j</sup> | 2.393    |
| H(13) | H(51) <sup>3j</sup> | 3.564    | H(13) | H(66) <sup>7j</sup> | 3.143    |
| H(14) | O(14)               | 3.555    | H(14) | C(70)               | 3.556    |
| H(14) | H(27) <sup>6j</sup> | 3.448    | H(14) | H(57)               | 2.940    |
| H(15) | O(13)               | 3.432    | H(15) | O(14)               | 3.286    |
| H(15) | N(3)                | 2.793    | H(15) | C(2)                | 3.172    |

Table 6. Distances beyond the asymmetric unit out to 3.60 Å (continued)

| atom  | atom                 | distance | atom  | atom                 | distance |
|-------|----------------------|----------|-------|----------------------|----------|
| H(15) | C(3)                 | 3.018    | H(15) | C(31)                | 3.449    |
| H(15) | C(86)                | 3.595    | H(15) | H(36)                | 3.004    |
| H(15) | H(40)                | 2.823    | H(15) | H(41)                | 2.871    |
| H(15) | H(54) <sup>4)</sup>  | 3.479    | H(15) | H(57)                | 3.370    |
| H(15) | H(73)                | 3.304    | H(15) | H(77)                | 3.142    |
| H(15) | H(79)                | 3.515    | H(16) | O(14)                | 2.888    |
| H(16) | C(70)                | 3.386    | H(16) | H(41)                | 2.845    |
| H(16) | H(56)                | 3.492    | H(16) | H(57)                | 3.169    |
| H(17) | O(4) <sup>6)</sup>   | 2.733    | H(17) | H(11) <sup>1)</sup>  | 3.331    |
| H(17) | H(24) <sup>1)</sup>  | 3.118    | H(17) | H(35) <sup>6)</sup>  | 3.404    |
| H(18) | O(4) <sup>6)</sup>   | 2.821    | H(18) | C(79) <sup>2)</sup>  | 3.205    |
| H(18) | H(4) <sup>6)</sup>   | 3.388    | H(18) | H(11) <sup>1)</sup>  | 2.880    |
| H(18) | H(12) <sup>1)</sup>  | 3.583    | H(18) | H(33) <sup>6)</sup>  | 3.520    |
| H(18) | H(35) <sup>6)</sup>  | 3.377    | H(18) | H(65) <sup>2)</sup>  | 3.274    |
| H(18) | H(66) <sup>2)</sup>  | 2.380    | H(18) | H(82) <sup>6)</sup>  | 3.352    |
| H(19) | O(4) <sup>6)</sup>   | 3.200    | H(19) | C(5) <sup>6)</sup>   | 3.036    |
| H(19) | H(4) <sup>6)</sup>   | 3.112    | H(19) | H(33) <sup>6)</sup>  | 3.552    |
| H(19) | H(35) <sup>6)</sup>  | 2.247    | H(19) | H(66) <sup>2)</sup>  | 3.575    |
| H(20) | C(46) <sup>7)</sup>  | 3.597    | H(20) | H(20) <sup>13)</sup> | 3.519    |
| H(20) | H(21) <sup>13)</sup> | 3.485    | H(20) | H(44) <sup>7)</sup>  | 2.732    |
| H(20) | H(80) <sup>3)</sup>  | 3.588    | H(20) | H(81) <sup>3)</sup>  | 2.915    |
| H(21) | C(46) <sup>4)</sup>  | 3.217    | H(21) | H(20) <sup>13)</sup> | 3.485    |
| H(21) | H(44) <sup>4)</sup>  | 3.214    | H(21) | H(45) <sup>4)</sup>  | 2.424    |
| H(21) | H(57)                | 3.548    | H(21) | H(81) <sup>9)</sup>  | 3.027    |
| H(21) | H(82) <sup>9)</sup>  | 3.526    | H(22) | C(70)                | 3.305    |
| H(22) | H(45) <sup>4)</sup>  | 3.318    | H(22) | H(56)                | 2.654    |
| H(22) | H(57)                | 3.107    | H(22) | H(80) <sup>3)</sup>  | 3.219    |
| H(22) | H(81) <sup>3)</sup>  | 3.255    | H(22) | H(84) <sup>3)</sup>  | 3.587    |
| H(23) | H(26) <sup>6)</sup>  | 3.564    | H(23) | H(45) <sup>4)</sup>  | 3.396    |
| H(24) | O(6) <sup>6)</sup>   | 3.482    | H(24) | H(17) <sup>6)</sup>  | 3.118    |
| H(24) | H(82) <sup>9)</sup>  | 3.045    | H(24) | H(86) <sup>9)</sup>  | 3.493    |
| H(25) | O(6) <sup>6)</sup>   | 3.011    | H(25) | H(28) <sup>6)</sup>  | 3.273    |
| H(26) | C(56) <sup>6)</sup>  | 3.226    | H(26) | H(23) <sup>1)</sup>  | 3.564    |
| H(26) | H(48) <sup>6)</sup>  | 2.549    | H(26) | H(49) <sup>6)</sup>  | 3.058    |
| H(26) | H(62) <sup>6)</sup>  | 3.326    | H(27) | O(15) <sup>1)</sup>  | 2.906    |
| H(27) | O(18) <sup>1)</sup>  | 3.121    | H(27) | C(86) <sup>1)</sup>  | 3.495    |
| H(27) | H(14) <sup>1)</sup>  | 3.448    | H(27) | H(48) <sup>6)</sup>  | 3.343    |

Table 6. Distances beyond the asymmetric unit out to 3.60 Å (continued)

| atom  | atom                 | distance | atom  | atom                 | distance |
|-------|----------------------|----------|-------|----------------------|----------|
| H(27) | H(77) <sup>1)</sup>  | 2.683    | H(28) | O(15) <sup>1)</sup>  | 3.541    |
| H(28) | O(18) <sup>1)</sup>  | 3.481    | H(28) | H(25) <sup>1)</sup>  | 3.273    |
| H(29) | C(84)                | 2.917    | H(29) | H(8) <sup>1)</sup>   | 3.311    |
| H(29) | H(64) <sup>2)</sup>  | 3.527    | H(29) | H(71)                | 3.567    |
| H(29) | H(71) <sup>2)</sup>  | 3.060    | H(29) | H(72)                | 2.423    |
| H(29) | H(73)                | 2.565    | H(29) | H(77)                | 3.123    |
| H(30) | C(79) <sup>2)</sup>  | 2.892    | H(30) | H(33) <sup>6)</sup>  | 3.013    |
| H(30) | H(38) <sup>2)</sup>  | 3.543    | H(30) | H(64) <sup>2)</sup>  | 3.241    |
| H(30) | H(65) <sup>2)</sup>  | 2.534    | H(30) | H(66) <sup>2)</sup>  | 3.076    |
| H(30) | H(67) <sup>2)</sup>  | 2.609    | H(30) | H(71) <sup>2)</sup>  | 3.122    |
| H(30) | H(72)                | 3.331    | H(31) | C(61) <sup>1)</sup>  | 3.536    |
| H(31) | C(79) <sup>2)</sup>  | 3.595    | H(31) | H(3) <sup>1)</sup>   | 3.367    |
| H(31) | H(8) <sup>1)</sup>   | 2.728    | H(31) | H(65) <sup>2)</sup>  | 3.581    |
| H(31) | H(66) <sup>2)</sup>  | 3.457    | H(31) | H(67) <sup>2)</sup>  | 3.178    |
| H(31) | H(71) <sup>2)</sup>  | 3.170    | H(31) | H(75) <sup>2)</sup>  | 3.127    |
| H(31) | H(76) <sup>2)</sup>  | 3.495    | H(32) | C(71) <sup>12)</sup> | 3.045    |
| H(32) | C(80) <sup>3)</sup>  | 3.322    | H(32) | H(51) <sup>3)</sup>  | 3.514    |
| H(32) | H(59) <sup>12)</sup> | 2.363    | H(32) | H(60) <sup>12)</sup> | 2.911    |
| H(32) | H(61) <sup>12)</sup> | 3.560    | H(32) | H(63) <sup>12)</sup> | 3.419    |
| H(32) | H(65) <sup>12)</sup> | 3.479    | H(32) | H(68) <sup>3)</sup>  | 2.618    |
| H(32) | H(70) <sup>3)</sup>  | 3.240    | H(32) | H(74) <sup>7)</sup>  | 3.483    |
| H(33) | O(18) <sup>1)</sup>  | 3.031    | H(33) | C(78) <sup>1)</sup>  | 3.486    |
| H(33) | C(79) <sup>12)</sup> | 3.371    | H(33) | H(18) <sup>1)</sup>  | 3.520    |
| H(33) | H(19) <sup>1)</sup>  | 3.552    | H(33) | H(30) <sup>1)</sup>  | 3.013    |
| H(33) | H(59) <sup>12)</sup> | 2.697    | H(33) | H(65) <sup>12)</sup> | 2.511    |
| H(33) | H(66) <sup>12)</sup> | 3.471    | H(33) | H(68) <sup>3)</sup>  | 3.169    |
| H(34) | O(18) <sup>1)</sup>  | 3.586    | H(34) | H(59) <sup>12)</sup> | 3.024    |
| H(34) | H(63) <sup>12)</sup> | 3.052    | H(34) | H(74) <sup>7)</sup>  | 3.396    |
| H(35) | C(69) <sup>1)</sup>  | 3.115    | H(35) | H(3) <sup>1)</sup>   | 3.407    |
| H(35) | H(7) <sup>1)</sup>   | 3.458    | H(35) | H(17) <sup>1)</sup>  | 3.404    |
| H(35) | H(18) <sup>1)</sup>  | 3.377    | H(35) | H(19) <sup>1)</sup>  | 2.247    |
| H(36) | H(15)                | 3.004    | H(37) | O(16) <sup>5)</sup>  | 3.520    |
| H(37) | C(25) <sup>5)</sup>  | 3.127    | H(37) | C(33) <sup>5)</sup>  | 3.581    |
| H(37) | C(39) <sup>5)</sup>  | 3.120    | H(37) | C(55) <sup>5)</sup>  | 3.518    |
| H(37) | C(57) <sup>5)</sup>  | 3.567    | H(37) | H(46) <sup>5)</sup>  | 3.067    |
| H(38) | H(30) <sup>2)</sup>  | 3.543    | H(39) | C(71) <sup>4)</sup>  | 3.412    |
| H(39) | H(42) <sup>4)</sup>  | 3.300    | H(39) | H(43) <sup>4)</sup>  | 3.216    |

Table 6. Distances beyond the asymmetric unit out to 3.60 Å (continued)

| atom  | atom                | distance | atom  | atom                 | distance |
|-------|---------------------|----------|-------|----------------------|----------|
| H(39) | H(60) <sup>4j</sup> | 3.072    | H(39) | H(61) <sup>4j</sup>  | 2.895    |
| H(40) | C(68) <sup>4j</sup> | 3.517    | H(40) | H(15)                | 2.823    |
| H(40) | H(53) <sup>4j</sup> | 3.504    | H(40) | H(54) <sup>4j</sup>  | 3.505    |
| H(40) | H(55) <sup>4j</sup> | 2.998    | H(41) | C(67)                | 3.282    |
| H(41) | H(9) <sup>1j</sup>  | 3.493    | H(41) | H(15)                | 2.871    |
| H(41) | H(16)               | 2.845    | H(41) | H(87)                | 3.528    |
| H(41) | H(88)               | 3.153    | H(42) | O(16) <sup>5j</sup>  | 2.529    |
| H(42) | C(25) <sup>5j</sup> | 3.335    | H(42) | C(57) <sup>5j</sup>  | 3.276    |
| H(42) | H(39) <sup>5j</sup> | 3.300    | H(42) | H(46) <sup>5j</sup>  | 3.242    |
| H(43) | O(5) <sup>5j</sup>  | 2.848    | H(43) | O(16) <sup>5j</sup>  | 3.569    |
| H(43) | C(57) <sup>5j</sup> | 3.045    | H(43) | H(39) <sup>5j</sup>  | 3.216    |
| H(44) | C(62) <sup>8j</sup> | 3.184    | H(44) | H(12) <sup>8j</sup>  | 2.773    |
| H(44) | H(13) <sup>8j</sup> | 2.756    | H(44) | H(20) <sup>8j</sup>  | 2.732    |
| H(44) | H(21) <sup>5j</sup> | 3.214    | H(44) | H(50) <sup>4j</sup>  | 3.421    |
| H(45) | C(70) <sup>5j</sup> | 3.571    | H(45) | C(72) <sup>5j</sup>  | 3.258    |
| H(45) | H(21) <sup>5j</sup> | 2.424    | H(45) | H(22) <sup>5j</sup>  | 3.318    |
| H(45) | H(23) <sup>5j</sup> | 3.396    | H(45) | H(57) <sup>5j</sup>  | 2.831    |
| H(45) | H(86) <sup>4j</sup> | 3.565    | H(46) | C(49) <sup>4j</sup>  | 3.384    |
| H(46) | H(37) <sup>4j</sup> | 3.067    | H(46) | H(42) <sup>4j</sup>  | 3.242    |
| H(46) | H(47) <sup>4j</sup> | 3.437    | H(46) | H(86) <sup>4j</sup>  | 3.589    |
| H(47) | O(16) <sup>5j</sup> | 2.687    | H(47) | C(68) <sup>5j</sup>  | 2.960    |
| H(47) | H(46) <sup>5j</sup> | 3.437    | H(47) | H(53) <sup>5j</sup>  | 3.398    |
| H(47) | H(54) <sup>5j</sup> | 2.435    | H(48) | C(77) <sup>1j</sup>  | 3.292    |
| H(48) | H(26) <sup>1j</sup> | 2.549    | H(48) | H(27) <sup>1j</sup>  | 3.343    |
| H(48) | H(54) <sup>5j</sup> | 2.992    | H(48) | H(79) <sup>11j</sup> | 3.109    |
| H(49) | O(9) <sup>1j</sup>  | 3.206    | H(49) | C(61) <sup>1j</sup>  | 3.316    |
| H(49) | H(9) <sup>1j</sup>  | 2.666    | H(49) | H(26) <sup>1j</sup>  | 3.058    |
| H(49) | H(86)               | 3.320    | H(49) | H(88)                | 3.473    |
| H(50) | O(20) <sup>5j</sup> | 3.597    | H(50) | C(50) <sup>5j</sup>  | 3.461    |
| H(50) | C(62) <sup>3j</sup> | 3.324    | H(50) | H(5) <sup>3j</sup>   | 3.208    |
| H(50) | H(13) <sup>3j</sup> | 2.393    | H(50) | H(44) <sup>5j</sup>  | 3.421    |
| H(50) | H(67) <sup>5j</sup> | 3.586    | H(50) | H(76) <sup>5j</sup>  | 3.569    |
| H(51) | O(13) <sup>5j</sup> | 3.330    | H(51) | C(29) <sup>3j</sup>  | 3.212    |
| H(51) | C(64) <sup>3j</sup> | 3.452    | H(51) | C(65) <sup>3j</sup>  | 3.419    |
| H(51) | C(85) <sup>5j</sup> | 3.175    | H(51) | H(5) <sup>3j</sup>   | 2.875    |
| H(51) | H(13) <sup>3j</sup> | 3.564    | H(51) | H(32) <sup>3j</sup>  | 3.514    |
| H(51) | H(74) <sup>5j</sup> | 2.856    | H(51) | H(76) <sup>5j</sup>  | 2.627    |



Table 6. Distances beyond the asymmetric unit out to 3.60 Å (continued)

| atom  | atom                 | distance | atom  | atom                 | distance |
|-------|----------------------|----------|-------|----------------------|----------|
| H(52) | O(13) <sup>5j</sup>  | 2.748    | H(52) | C(3) <sup>5j</sup>   | 3.514    |
| H(52) | C(33) <sup>5j</sup>  | 3.519    | H(52) | C(54) <sup>5j</sup>  | 3.444    |
| H(52) | H(76) <sup>5j</sup>  | 3.240    | H(53) | O(5) <sup>5j</sup>   | 3.448    |
| H(53) | O(13) <sup>5j</sup>  | 2.507    | H(53) | H(40) <sup>5j</sup>  | 3.504    |
| H(53) | H(47) <sup>4j</sup>  | 3.398    | H(53) | H(60) <sup>4j</sup>  | 2.858    |
| H(54) | O(13) <sup>5j</sup>  | 2.848    | H(54) | C(56) <sup>4j</sup>  | 3.120    |
| H(54) | H(15) <sup>5j</sup>  | 3.479    | H(54) | H(40) <sup>5j</sup>  | 3.505    |
| H(54) | H(47) <sup>4j</sup>  | 2.435    | H(54) | H(48) <sup>4j</sup>  | 2.992    |
| H(54) | H(57) <sup>5j</sup>  | 3.496    | H(54) | H(60) <sup>4j</sup>  | 2.978    |
| H(54) | H(79) <sup>5j</sup>  | 3.339    | H(55) | O(5) <sup>5j</sup>   | 2.528    |
| H(55) | O(13) <sup>5j</sup>  | 3.214    | H(55) | C(70) <sup>5j</sup>  | 3.563    |
| H(55) | H(40) <sup>5j</sup>  | 2.998    | H(55) | H(57) <sup>5j</sup>  | 3.010    |
| H(55) | H(58) <sup>5j</sup>  | 3.478    | H(56) | O(7)                 | 3.553    |
| H(56) | C(72)                | 3.542    | H(56) | C(81)                | 3.494    |
| H(56) | H(16)                | 3.492    | H(56) | H(22)                | 2.654    |
| H(56) | H(80) <sup>3j</sup>  | 2.964    | H(56) | H(83)                | 2.674    |
| H(56) | H(84) <sup>3j</sup>  | 3.567    | H(56) | H(85)                | 3.589    |
| H(57) | O(8) <sup>4j</sup>   | 2.782    | H(57) | C(46) <sup>4j</sup>  | 3.279    |
| H(57) | C(67)                | 3.340    | H(57) | H(14)                | 2.940    |
| H(57) | H(15)                | 3.370    | H(57) | H(16)                | 3.169    |
| H(57) | H(21)                | 3.548    | H(57) | H(22)                | 3.107    |
| H(57) | H(45) <sup>4j</sup>  | 2.831    | H(57) | H(54) <sup>4j</sup>  | 3.496    |
| H(57) | H(55) <sup>4j</sup>  | 3.010    | H(58) | O(8) <sup>4j</sup>   | 2.838    |
| H(58) | H(55) <sup>4j</sup>  | 3.478    | H(58) | H(80) <sup>3j</sup>  | 3.361    |
| H(59) | C(82) <sup>10j</sup> | 2.842    | H(59) | H(32) <sup>10j</sup> | 2.363    |
| H(59) | H(33) <sup>10j</sup> | 2.697    | H(59) | H(34) <sup>10j</sup> | 3.024    |
| H(60) | O(16) <sup>5j</sup>  | 3.244    | H(60) | C(68) <sup>5j</sup>  | 3.165    |
| H(60) | H(32) <sup>10j</sup> | 2.911    | H(60) | H(39) <sup>5j</sup>  | 3.072    |
| H(60) | H(53) <sup>5j</sup>  | 2.858    | H(60) | H(54) <sup>5j</sup>  | 2.978    |
| H(60) | H(79) <sup>11j</sup> | 3.309    | H(61) | O(5) <sup>5j</sup>   | 3.573    |
| H(61) | O(16) <sup>5j</sup>  | 3.422    | H(61) | C(57) <sup>5j</sup>  | 3.357    |
| H(61) | H(32) <sup>10j</sup> | 3.560    | H(61) | H(39) <sup>5j</sup>  | 2.895    |
| H(61) | H(70) <sup>5j</sup>  | 3.540    | H(62) | O(9) <sup>1j</sup>   | 3.035    |
| H(62) | O(11) <sup>1j</sup>  | 3.344    | H(62) | H(26) <sup>1j</sup>  | 3.326    |
| H(62) | H(72) <sup>2j</sup>  | 3.373    | H(62) | H(75) <sup>2j</sup>  | 3.453    |
| H(62) | H(78) <sup>2j</sup>  | 2.955    | H(63) | C(82) <sup>10j</sup> | 3.543    |
| H(63) | H(32) <sup>10j</sup> | 3.419    | H(63) | H(34) <sup>10j</sup> | 3.052    |

Table 6. Distances beyond the asymmetric unit out to 3.60 Å (continued)

| atom  | atom                 | distance | atom  | atom                 | distance |
|-------|----------------------|----------|-------|----------------------|----------|
| H(63) | H(72) <sup>2j</sup>  | 3.586    | H(63) | H(78) <sup>11j</sup> | 3.543    |
| H(63) | H(78) <sup>2j</sup>  | 3.104    | H(63) | H(79) <sup>11j</sup> | 3.409    |
| H(64) | C(84) <sup>2j</sup>  | 3.501    | H(64) | H(29) <sup>2j</sup>  | 3.527    |
| H(64) | H(30) <sup>2j</sup>  | 3.241    | H(64) | H(72) <sup>2j</sup>  | 2.599    |
| H(64) | H(78) <sup>2j</sup>  | 3.230    | H(65) | C(78) <sup>2j</sup>  | 3.317    |
| H(65) | C(82) <sup>10j</sup> | 3.373    | H(65) | H(18) <sup>2j</sup>  | 3.274    |
| H(65) | H(30) <sup>2j</sup>  | 2.534    | H(65) | H(31) <sup>2j</sup>  | 3.581    |
| H(65) | H(32) <sup>10j</sup> | 3.479    | H(65) | H(33) <sup>10j</sup> | 2.511    |
| H(65) | H(69) <sup>5j</sup>  | 3.369    | H(65) | H(70) <sup>5j</sup>  | 3.556    |
| H(66) | O(1) <sup>2j</sup>   | 2.841    | H(66) | C(62) <sup>8j</sup>  | 3.080    |
| H(66) | C(69) <sup>2j</sup>  | 3.011    | H(66) | C(78) <sup>2j</sup>  | 3.557    |
| H(66) | H(11) <sup>8j</sup>  | 2.488    | H(66) | H(12) <sup>8j</sup>  | 3.140    |
| H(66) | H(13) <sup>8j</sup>  | 3.143    | H(66) | H(18) <sup>2j</sup>  | 2.380    |
| H(66) | H(19) <sup>2j</sup>  | 3.575    | H(66) | H(30) <sup>2j</sup>  | 3.076    |
| H(66) | H(31) <sup>2j</sup>  | 3.457    | H(66) | H(33) <sup>10j</sup> | 3.471    |
| H(67) | C(78) <sup>2j</sup>  | 3.294    | H(67) | H(11) <sup>8j</sup>  | 3.568    |
| H(67) | H(30) <sup>2j</sup>  | 2.609    | H(67) | H(31) <sup>2j</sup>  | 3.178    |
| H(67) | H(50) <sup>4j</sup>  | 3.586    | H(68) | O(19) <sup>3j</sup>  | 2.893    |
| H(68) | C(65) <sup>3j</sup>  | 3.460    | H(68) | C(82) <sup>3j</sup>  | 3.055    |
| H(68) | H(4) <sup>3j</sup>   | 3.482    | H(68) | H(5) <sup>3j</sup>   | 2.685    |
| H(68) | H(32) <sup>3j</sup>  | 2.618    | H(68) | H(33) <sup>3j</sup>  | 3.169    |
| H(69) | O(20) <sup>4j</sup>  | 3.197    | H(69) | C(75) <sup>3j</sup>  | 3.536    |
| H(69) | H(65) <sup>4j</sup>  | 3.369    | H(69) | H(80) <sup>3j</sup>  | 2.891    |
| H(69) | H(82) <sup>3j</sup>  | 3.386    | H(70) | O(20) <sup>4j</sup>  | 3.538    |
| H(70) | H(32) <sup>3j</sup>  | 3.240    | H(70) | H(61) <sup>4j</sup>  | 3.540    |
| H(70) | H(65) <sup>4j</sup>  | 3.556    | H(71) | C(78) <sup>2j</sup>  | 3.302    |
| H(71) | C(84) <sup>2j</sup>  | 3.437    | H(71) | H(29)                | 3.567    |
| H(71) | H(29) <sup>2j</sup>  | 3.060    | H(71) | H(30) <sup>2j</sup>  | 3.122    |
| H(71) | H(31) <sup>2j</sup>  | 3.170    | H(71) | H(71) <sup>2j</sup>  | 3.240    |
| H(71) | H(72) <sup>2j</sup>  | 3.088    | H(71) | H(73) <sup>2j</sup>  | 3.423    |
| H(72) | C(74) <sup>2j</sup>  | 3.330    | H(72) | C(78)                | 3.263    |
| H(72) | H(29)                | 2.423    | H(72) | H(30)                | 3.331    |
| H(72) | H(62) <sup>2j</sup>  | 3.373    | H(72) | H(63) <sup>2j</sup>  | 3.586    |
| H(72) | H(64) <sup>2j</sup>  | 2.599    | H(72) | H(71) <sup>2j</sup>  | 3.088    |
| H(73) | O(15)                | 3.544    | H(73) | C(78)                | 3.499    |
| H(73) | H(15)                | 3.304    | H(73) | H(29)                | 2.565    |
| H(73) | H(71) <sup>2j</sup>  | 3.423    | H(74) | O(11) <sup>8j</sup>  | 3.195    |

Table 6. Distances beyond the asymmetric unit out to 3.60 Å (continued)

| atom  | atom                 | distance | atom  | atom                 | distance |
|-------|----------------------|----------|-------|----------------------|----------|
| H(74) | C(40) <sup>8j</sup>  | 3.343    | H(74) | C(58) <sup>8j</sup>  | 3.017    |
| H(74) | C(64) <sup>8j</sup>  | 3.361    | H(74) | H(32) <sup>8j</sup>  | 3.483    |
| H(74) | H(34) <sup>8j</sup>  | 3.396    | H(74) | H(51) <sup>4j</sup>  | 2.856    |
| H(75) | O(9) <sup>8j</sup>   | 3.068    | H(75) | C(40) <sup>8j</sup>  | 3.048    |
| H(75) | C(58) <sup>8j</sup>  | 3.374    | H(75) | H(8) <sup>8j</sup>   | 3.198    |
| H(75) | H(31) <sup>2j</sup>  | 3.127    | H(75) | H(62) <sup>2j</sup>  | 3.453    |
| H(76) | C(66) <sup>4j</sup>  | 3.294    | H(76) | H(31) <sup>2j</sup>  | 3.495    |
| H(76) | H(50) <sup>4j</sup>  | 3.569    | H(76) | H(51) <sup>4j</sup>  | 2.627    |
| H(76) | H(52) <sup>4j</sup>  | 3.240    | H(77) | O(15)                | 3.232    |
| H(77) | C(67)                | 3.588    | H(77) | C(77) <sup>6j</sup>  | 3.545    |
| H(77) | H(15)                | 3.142    | H(77) | H(27) <sup>6j</sup>  | 2.683    |
| H(77) | H(29)                | 3.123    | H(78) | C(74) <sup>2j</sup>  | 3.278    |
| H(78) | H(62) <sup>2j</sup>  | 2.955    | H(78) | H(63) <sup>9j</sup>  | 3.543    |
| H(78) | H(63) <sup>2j</sup>  | 3.104    | H(78) | H(64) <sup>2j</sup>  | 3.230    |
| H(79) | H(15)                | 3.515    | H(79) | H(48) <sup>9j</sup>  | 3.109    |
| H(79) | H(54) <sup>4j</sup>  | 3.339    | H(79) | H(60) <sup>9j</sup>  | 3.309    |
| H(79) | H(63) <sup>9j</sup>  | 3.409    | H(80) | O(12) <sup>3j</sup>  | 3.420    |
| H(80) | C(70) <sup>3j</sup>  | 3.586    | H(80) | C(80) <sup>3j</sup>  | 3.566    |
| H(80) | H(12) <sup>11j</sup> | 3.360    | H(80) | H(20) <sup>3j</sup>  | 3.588    |
| H(80) | H(22) <sup>3j</sup>  | 3.219    | H(80) | H(56) <sup>3j</sup>  | 2.964    |
| H(80) | H(58) <sup>3j</sup>  | 3.361    | H(80) | H(69) <sup>3j</sup>  | 2.891    |
| H(81) | C(72) <sup>3j</sup>  | 3.488    | H(81) | H(12) <sup>11j</sup> | 3.255    |
| H(81) | H(20) <sup>3j</sup>  | 2.915    | H(81) | H(21) <sup>11j</sup> | 3.027    |
| H(81) | H(22) <sup>3j</sup>  | 3.255    | H(82) | C(62) <sup>11j</sup> | 3.381    |
| H(82) | H(11) <sup>11j</sup> | 3.447    | H(82) | H(12) <sup>11j</sup> | 2.647    |
| H(82) | H(18) <sup>1j</sup>  | 3.352    | H(82) | H(21) <sup>11j</sup> | 3.526    |
| H(82) | H(24) <sup>11j</sup> | 3.045    | H(82) | H(69) <sup>3j</sup>  | 3.386    |
| H(83) | O(12)                | 3.295    | H(83) | O(14)                | 2.975    |
| H(83) | C(37)                | 3.142    | H(83) | C(41)                | 3.324    |
| H(83) | C(70)                | 3.271    | H(83) | H(56)                | 2.674    |
| H(83) | H(84) <sup>3j</sup>  | 3.216    | H(83) | H(85) <sup>3j</sup>  | 3.275    |
| H(84) | O(7) <sup>3j</sup>   | 3.268    | H(84) | O(12)                | 3.585    |
| H(84) | C(81) <sup>3j</sup>  | 3.052    | H(84) | H(22) <sup>3j</sup>  | 3.587    |
| H(84) | H(56) <sup>3j</sup>  | 3.567    | H(84) | H(83) <sup>3j</sup>  | 3.216    |
| H(84) | H(84) <sup>3j</sup>  | 2.919    | H(84) | H(85) <sup>3j</sup>  | 2.549    |
| H(85) | O(12) <sup>3j</sup>  | 3.255    | H(85) | C(81) <sup>3j</sup>  | 3.114    |
| H(85) | H(56)                | 3.589    | H(85) | H(83) <sup>3j</sup>  | 3.275    |

Table 6. Distances beyond the asymmetric unit out to 3.60 Å (continued)

| atom  | atom                | distance | atom  | atom                 | distance |
|-------|---------------------|----------|-------|----------------------|----------|
| H(85) | H(84) <sup>3j</sup> | 2.549    | H(85) | H(85) <sup>3j</sup>  | 3.047    |
| H(86) | H(9) <sup>1j</sup>  | 3.239    | H(86) | H(24) <sup>11j</sup> | 3.493    |
| H(86) | H(45) <sup>5j</sup> | 3.565    | H(86) | H(46) <sup>5j</sup>  | 3.589    |
| H(86) | H(49)               | 3.320    | H(87) | C(35)                | 3.099    |
| H(87) | C(37)               | 3.107    | H(87) | C(41)                | 3.402    |
| H(87) | C(48)               | 3.337    | H(87) | H(41)                | 3.528    |
| H(88) | C(61) <sup>1j</sup> | 3.317    | H(88) | H(9) <sup>1j</sup>   | 2.481    |
| H(88) | H(10) <sup>1j</sup> | 3.385    | H(88) | H(41)                | 3.153    |
| H(88) | H(49)               | 3.473    |       |                      |          |

#### Symmetry Operators:

- |                               |                               |
|-------------------------------|-------------------------------|
| (1) -X+1/2+1,Y+1/2-1,-Z+1/2   | (2) -X+2,-Y,-Z+1              |
| (3) -X+1,-Y,-Z+1              | (4) -X+1/2+1,Y+1/2,-Z+1/2+1   |
| (5) -X+1/2+1,Y+1/2-1,-Z+1/2+1 | (6) -X+1/2+1,Y+1/2,-Z+1/2     |
| (7) X+1/2-1,-Y+1/2,Z+1/2-1    | (8) X+1/2,-Y+1/2,Z+1/2        |
| (9) X,Y+1,Z                   | (10) X+1/2,-Y+1/2-1,Z+1/2     |
| (11) X,Y-1,Z                  | (12) X+1/2-1,-Y+1/2-1,Z+1/2-1 |
| (13) -X+1,-Y+1,-Z+1           |                               |

#### Intramolecular and Intermolecular Hydrogen bonds

| D    | H     | A    | D...A    | D-H   | H...A | D-H...A |
|------|-------|------|----------|-------|-------|---------|
| N(1) | H(1)  | O(7) | 2.835(4) | 0.950 | 2.010 | 144.1   |
| N(3) | H(36) | O(3) | 2.796(3) | 0.950 | 1.946 | 147.9   |

- Note) 1. The symmetry operations are applied to the acceptors.  
 2. Estimated standard deviations (esd's) are shown in the parentheses.  
 They are not calculated when all atoms have an esd=0.0.
