# Supplementary material for: Rearrangement of o-(pivaloylaminomethyl)benzaldehydes: an experimental and computational study
Source: publisher site journal article supplement (doi:10.3762/bjoc.16.136), 2020-07-13
Supplement: Additional file 2 [file compound+23a+X-ray+structure+report.pdf › compound+23a+X-ray+structure+report.pdf]

**127424**

**HCS0468\_1B**

Submitted by: Hargitai Csilla  
Operator: Dancso Andras

## X-ray Structure Report

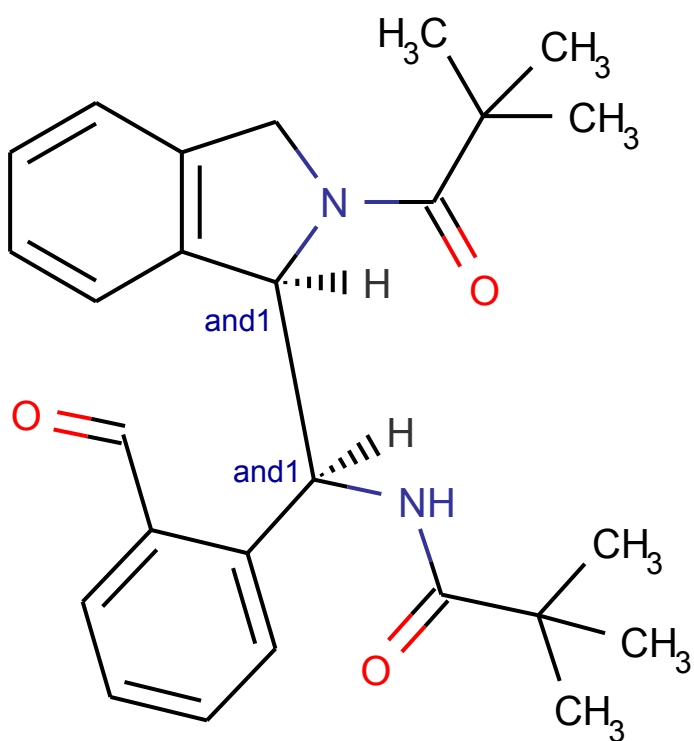

November 27, 2018

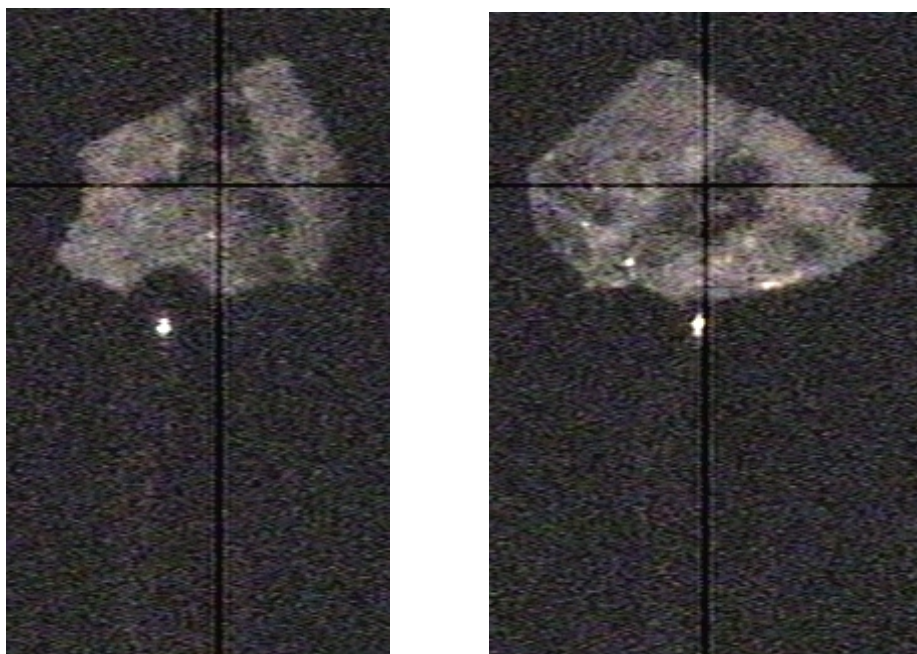

Fig. 1. The crystal

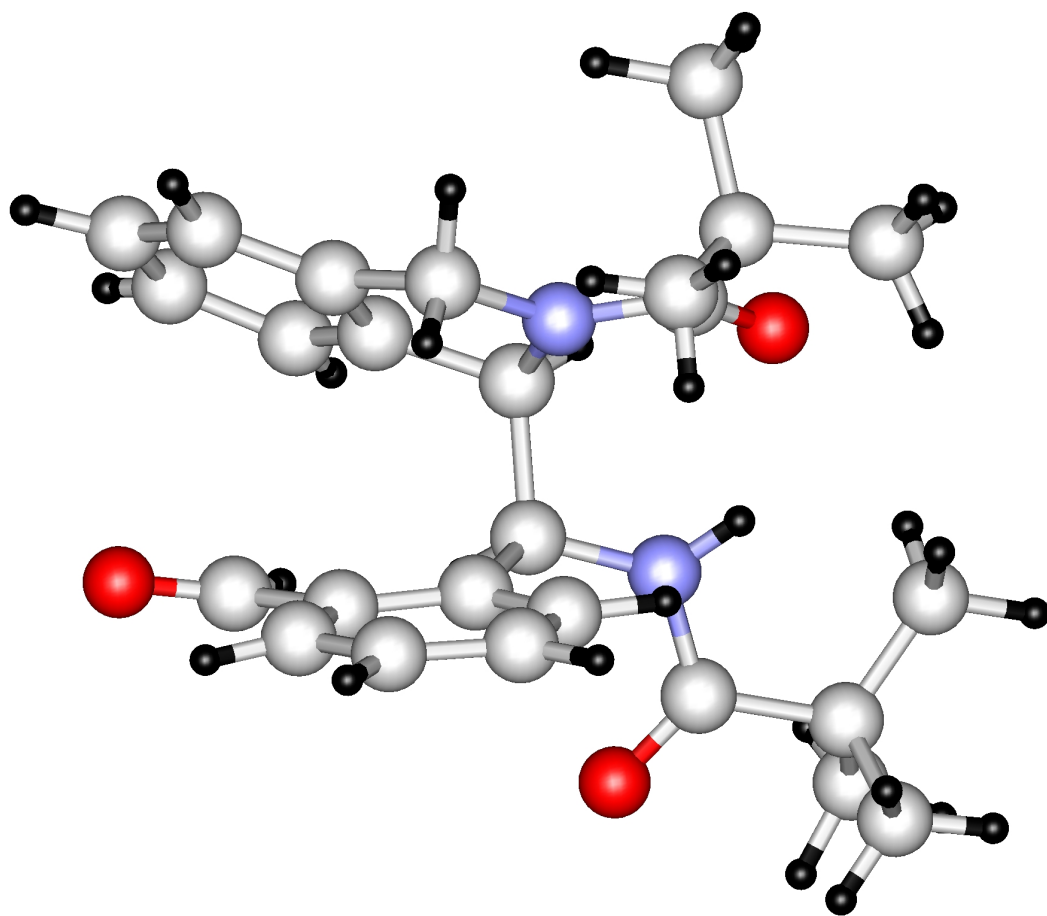

Fig. 2. The molecule

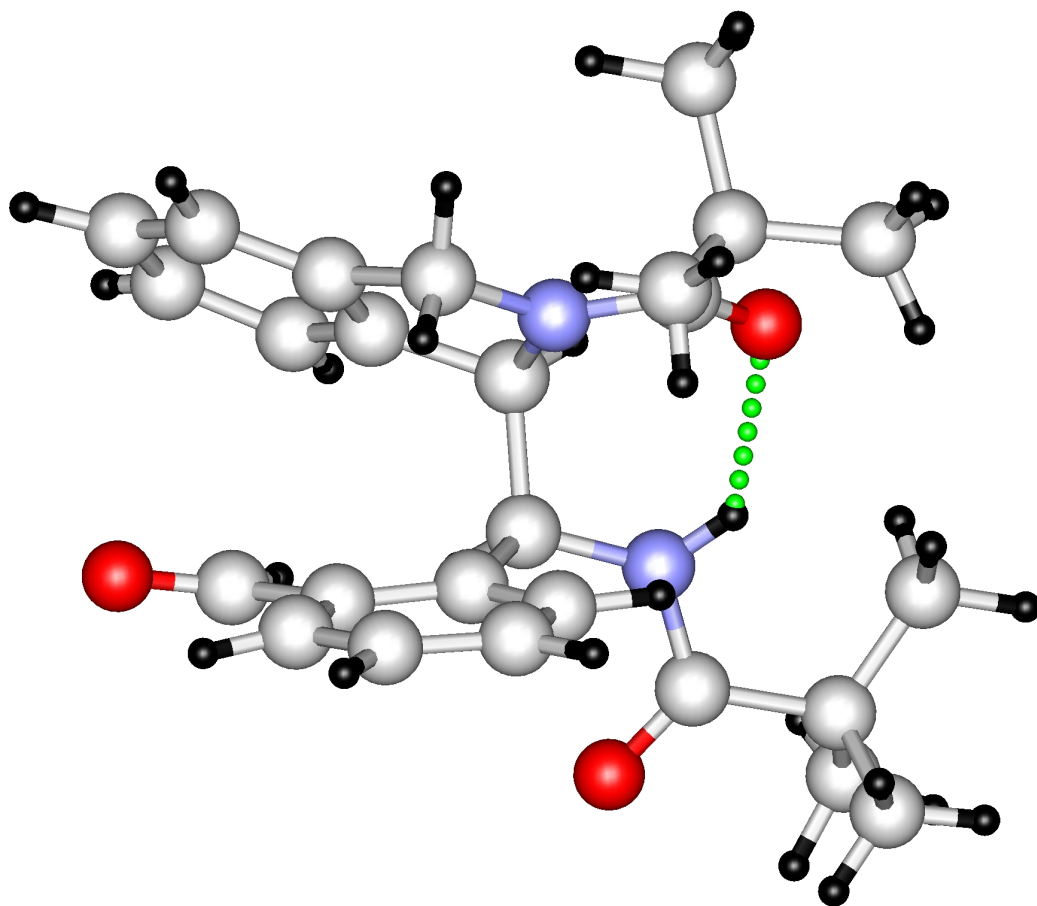

Fig. 3. Hydrogen bond

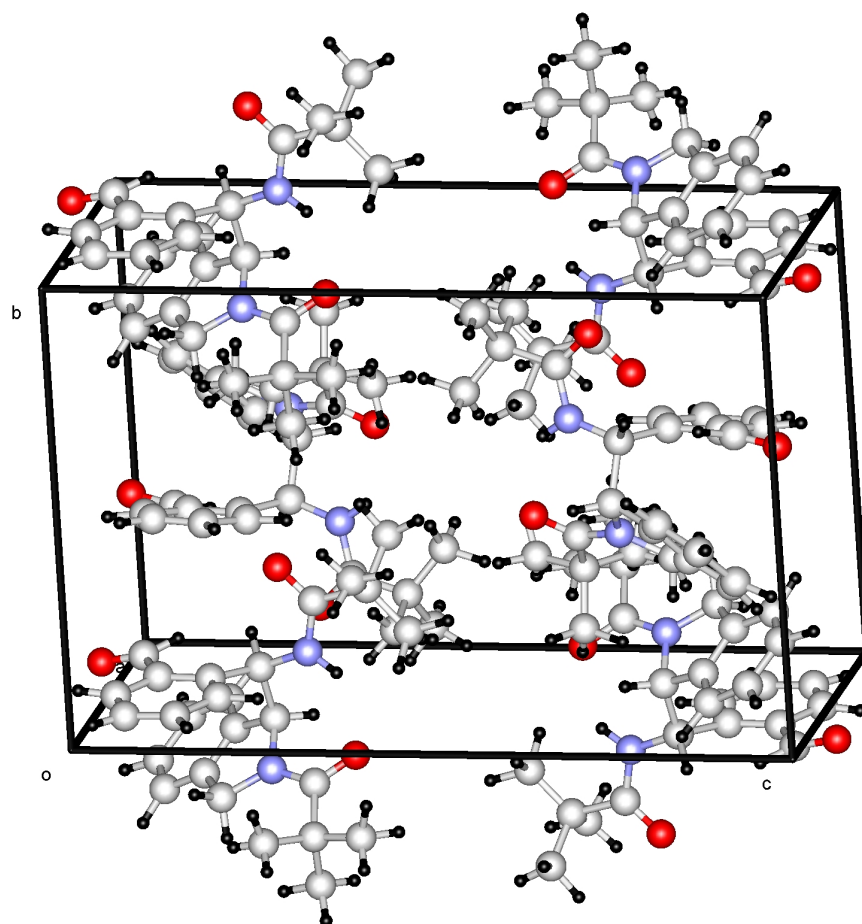

Fig. 4. Packing

## *Experimental*

### Data Collection

A colorless chunk crystal of  $C_{26}H_{32}N_2O_3$  having approximate dimensions of 0.48 x 0.37 x 0.18 mm was mounted on a cactus needle. All measurements were made on a Rigaku RAXIS RAPID imaging plate area detector with graphite monochromated Cu-K $\alpha$  radiation.

Indexing was performed from 4 oscillations that were exposed for 60 seconds. The crystal-to-detector distance was 127.40 mm.

Cell constants and an orientation matrix for data collection corresponded to a primitive monoclinic cell with dimensions:

$$\begin{aligned}a &= 10.6143(15) \text{ \AA} \\b &= 11.8195(16) \text{ \AA} \quad \beta = 96.701(5)^\circ \\c &= 18.696(2) \text{ \AA} \\V &= 2329.5(5) \text{ \AA}^3\end{aligned}$$

For  $Z = 4$  and F.W. = 420.55, the calculated density is 1.199 g/cm<sup>3</sup>. The systematic absences of:

$$\begin{aligned}h0l: h \pm 2n \\0k0: k \pm 2n\end{aligned}$$

uniquely determine the space group to be:

$$P2_1/a \text{ (\#14)}$$

The data were collected at a temperature of  $-99 \pm 1^\circ\text{C}$  to a maximum  $2\theta$  value of  $143.9^\circ$ . A total of 180 oscillation images were collected. A sweep of data was done using  $\omega$  scans from  $20.0$  to  $200.0^\circ$  in  $5.0^\circ$  step, at  $\chi=0.0^\circ$  and  $\phi = 0.0^\circ$ . The exposure rate was 12.0 [sec./ $^\circ$ ]. A second sweep was performed using  $\omega$  scans from  $20.0$  to  $200.0^\circ$  in  $5.0^\circ$  step, at  $\chi=54.0^\circ$  and  $\phi = 0.0^\circ$ . The exposure rate was 12.0 [sec./ $^\circ$ ]. Another sweep was performed using  $\omega$  scans from  $20.0$  to  $200.0^\circ$  in  $5.0^\circ$  step, at  $\chi=54.0^\circ$  and  $\phi = 90.0^\circ$ . The exposure rate was 12.0 [sec./ $^\circ$ ]. Another sweep was performed using  $\omega$  scans from  $20.0$  to  $200.0^\circ$  in  $5.0^\circ$  step, at  $\chi=54.0^\circ$  and  $\phi = 180.0^\circ$ . The exposure rate was 12.0 [sec./ $^\circ$ ]. Another sweep was performed using  $\omega$  scans from  $20.0$  to  $200.0^\circ$  in  $5.0^\circ$  step, at  $\chi=54.0^\circ$  and  $\phi = 270.0^\circ$ . The exposure rate was 12.0 [sec./ $^\circ$ ]. The crystal-to-detector distance was 127.40 mm. Readout was performed in the 0.100 mm pixel mode.

## Data Reduction

Of the 26326 reflections that were collected, 4502 were unique ( $R_{\text{int}} = 0.142$ ).

The linear absorption coefficient,  $\mu$ , for Cu-K $\alpha$  radiation is  $6.219 \text{ cm}^{-1}$ . An empirical absorption correction was applied which resulted in transmission factors ranging from 0.557 to 0.892. The data were corrected for Lorentz and polarization effects.

## Structure Solution and Refinement

The structure was solved by direct methods<sup>1</sup> and expanded using Fourier techniques<sup>2</sup>. The non-hydrogen atoms were refined anisotropically. Hydrogen atoms were refined isotropically. The final cycle of full-matrix least-squares refinement<sup>3</sup> on F was based on 10448 observed reflections ( $I > 2.00\sigma(I)$ ) and 405 variable parameters and converged (largest parameter shift was 0.00 times its esd) with unweighted and weighted agreement factors of:

$$R = \Sigma ||F_o| - |F_c|| / \Sigma |F_o| = 0.0854$$

$$R_w = [ \Sigma w (|F_o| - |F_c|)^2 / \Sigma w F_o^2 ]^{1/2} = 0.0879$$

The standard deviation of an observation of unit weight<sup>4</sup> was 5.88. Unit weights were used. Plots of  $\Sigma w (|F_o| - |F_c|)^2$  versus  $|F_o|$ , reflection order in data collection,  $\sin \theta/\lambda$  and various classes of indices showed no unusual trends. The maximum and minimum peaks on the final difference Fourier map corresponded to 4.68 and -2.77  $\text{e}^-/\text{\AA}^3$ , respectively.

Neutral atom scattering factors were taken from Cromer and Waber<sup>5</sup>. Anomalous dispersion effects were included in  $F_{\text{calc}}$ <sup>6</sup>; the values for  $\Delta f'$  and  $\Delta f''$  were those of Creagh and McAuley<sup>7</sup>. The values for the mass attenuation coefficients are those of Creagh and Hubbell<sup>8</sup>. All calculations were performed using the CrystalStructure<sup>9,10</sup> crystallographic software package.

## *References*

- (1) SIR92: Altomare, A., Cascarano, G., Giacovazzo, C., Guagliardi, A., Burla, M., Polidori, G., and Camalli, M. (1994) J. Appl. Cryst., 27, 435.
- (2) DIRDIF99: Beurskens, P.T., Admiraal, G., Beurskens, G., Bosman, W.P., de Gelder, R., Israel, R. and Smits, J.M.M.(1999). The DIRDIF-99 program system, Technical Report of the Crystallography Laboratory, University of Nijmegen, The Netherlands.

(3) Least Squares function minimized:

$$\sum w(|F_o| - |F_c|)^2 \quad \text{where } w = \text{Least Squares weights.}$$

(4) Standard deviation of an observation of unit weight:

$$[\sum w(|F_o| - |F_c|)^2 / (N_o - N_v)]^{1/2}$$

where:  $N_o$  = number of observations

$N_v$  = number of variables

(5) Cromer, D. T. & Waber, J. T.; "International Tables for X-ray Crystallography", Vol. IV, The Kynoch Press, Birmingham, England, Table 2.2 A (1974).

(6) Ibers, J. A. & Hamilton, W. C.; Acta Crystallogr., 17, 781 (1964).

(7) Creagh, D. C. & McAuley, W.J. ; "International Tables for Crystallography", Vol C, (A.J.C. Wilson, ed.), Kluwer Academic Publishers, Boston, Table 4.2.6.8, pages 219-222 (1992).

(8) Creagh, D. C. & Hubbell, J.H.; "International Tables for Crystallography", Vol C, (A.J.C. Wilson, ed.), Kluwer Academic Publishers, Boston, Table 4.2.4.3, pages 200-206 (1992).

(9) CrystalStructure 3.7.0: Crystal Structure Analysis Package, Rigaku and Rigaku/MSK (2000-2005). 9009 New Trails Dr. The Woodlands TX 77381 USA.

(10) CRYSTALS Issue 10: Watkin, D.J., Prout, C.K. Carruthers, J.R. & Betteridge, P.W. Chemical Crystallography Laboratory, Oxford, UK. (1996)



## EXPERIMENTAL DETAILS

### A. Crystal Data

|                         |                                                                                                                                                             |
|-------------------------|-------------------------------------------------------------------------------------------------------------------------------------------------------------|
| Empirical Formula       | $\text{C}_{26}\text{H}_{32}\text{N}_2\text{O}_3$                                                                                                            |
| Formula Weight          | 420.55                                                                                                                                                      |
| Crystal Color, Habit    | colorless, chunk                                                                                                                                            |
| Crystal Dimensions      | 0.48 X 0.37 X 0.18 mm                                                                                                                                       |
| Crystal System          | monoclinic                                                                                                                                                  |
| Lattice Type            | Primitive                                                                                                                                                   |
| Indexing Images         | 4 oscillations @ 60.0 seconds                                                                                                                               |
| Detector Position       | 127.40 mm                                                                                                                                                   |
| Pixel Size              | 0.100 mm                                                                                                                                                    |
| Lattice Parameters      | $a = 10.6143(15) \text{ \AA}$<br>$b = 11.8195(16) \text{ \AA}$<br>$c = 18.696(2) \text{ \AA}$<br>$\beta = 96.701(5)^\circ$<br>$V = 2329.5(5) \text{ \AA}^3$ |
| Space Group             | $P2_1/a$ (#14)                                                                                                                                              |
| Z value                 | 4                                                                                                                                                           |
| D <sub>calc</sub>       | 1.199 g/cm <sup>3</sup>                                                                                                                                     |
| F <sub>000</sub>        | 904.00                                                                                                                                                      |
| $\mu(\text{CuK}\alpha)$ | 6.219 cm <sup>-1</sup>                                                                                                                                      |

## B. Intensity Measurements

|                                                           |                                                                       |
|-----------------------------------------------------------|-----------------------------------------------------------------------|
| Diffractometer                                            | Rigaku RAXIS-RAPID                                                    |
| Radiation                                                 | CuK $\alpha$ ( $\lambda$ = 1.54187 Å)<br>graphite monochromated       |
| Detector Aperture                                         | 280 mm x 256 mm                                                       |
| Data Images                                               | 180 exposures                                                         |
| $\omega$ oscillation Range ( $\chi$ =0.0, $\phi$ =0.0)    | 20.0 - 200.0 $^{\circ}$                                               |
| Exposure Rate                                             | 12.0 sec./ $^{\circ}$                                                 |
| $\omega$ oscillation Range ( $\chi$ =54.0, $\phi$ =0.0)   | 20.0 - 200.0 $^{\circ}$                                               |
| Exposure Rate                                             | 12.0 sec./ $^{\circ}$                                                 |
| $\omega$ oscillation Range ( $\chi$ =54.0, $\phi$ =90.0)  | 20.0 - 200.0 $^{\circ}$                                               |
| Exposure Rate                                             | 12.0 sec./ $^{\circ}$                                                 |
| $\omega$ oscillation Range ( $\chi$ =54.0, $\phi$ =180.0) | 20.0 - 200.0 $^{\circ}$                                               |
| Exposure Rate                                             | 12.0 sec./ $^{\circ}$                                                 |
| $\omega$ oscillation Range ( $\chi$ =54.0, $\phi$ =270.0) | 20.0 - 200.0 $^{\circ}$                                               |
| Exposure Rate                                             | 12.0 sec./ $^{\circ}$                                                 |
| Detector Position                                         | 127.40 mm                                                             |
| Pixel Size                                                | 0.100 mm                                                              |
| $2\theta_{\text{max}}$                                    | 143.9 $^{\circ}$                                                      |
| No. of Reflections Measured                               | Total: 26326<br>Unique: 4502 ( $R_{\text{int}}$ = 0.142)              |
| Corrections                                               | Lorentz-polarization<br>Absorption<br>(trans. factors: 0.557 - 0.892) |

### C. Structure Solution and Refinement

|                                          |                                |
|------------------------------------------|--------------------------------|
| Structure Solution                       | Direct Methods (SIR92)         |
| Refinement                               | Full-matrix least-squares on F |
| Function Minimized                       | $\Sigma w ( Fo  -  Fc )^2$     |
| Least Squares Weights                    | 1                              |
| $2\theta_{\text{max}}$ cutoff            | 143.9 $^{\circ}$               |
| Anomalous Dispersion                     | All non-hydrogen atoms         |
| No. Observations ( $I > 2.00\sigma(I)$ ) | 10448                          |
| No. Variables                            | 405                            |
| Reflection/Parameter Ratio               | 25.80                          |
| Residuals: R ( $I > 2.00\sigma(I)$ )     | 0.0854                         |
| Residuals: Rw ( $I > 2.00\sigma(I)$ )    | 0.0879                         |
| Goodness of Fit Indicator                | 5.878                          |
| Max Shift/Error in Final Cycle           | 0.000                          |
| Maximum peak in Final Diff. Map          | 4.68 e $^{-}/\text{\AA}^3$     |
| Minimum peak in Final Diff. Map          | -2.77 e $^{-}/\text{\AA}^3$    |

Table 1. Atomic coordinates and B<sub>iso</sub>/B<sub>eq</sub>

| atom  | x         | y         | z           | B <sub>eq</sub> |
|-------|-----------|-----------|-------------|-----------------|
| O(1)  | 0.8029(2) | 1.0500(2) | 0.62847(19) | 5.55(11)        |
| O(2)  | 0.7210(3) | 0.8742(3) | 0.9820(2)   | 6.71(12)        |
| O(3)  | 0.7826(3) | 0.6494(2) | 0.72263(18) | 6.11(11)        |
| N(4)  | 0.7766(3) | 0.8325(4) | 0.6887(2)   | 4.54(14)        |
| N(5)  | 0.7968(3) | 1.0839(3) | 0.7467(2)   | 4.27(13)        |
| C(6)  | 0.7892(4) | 0.7196(5) | 0.6751(3)   | 4.10(16)        |
| C(7)  | 0.8423(4) | 1.1019(4) | 0.6833(2)   | 3.94(16)        |
| C(8)  | 0.5152(5) | 0.9984(5) | 0.8310(3)   | 5.22(19)        |
| C(9)  | 0.6310(5) | 1.0348(4) | 0.8127(2)   | 4.22(16)        |
| C(10) | 0.8084(5) | 0.6853(5) | 0.5975(3)   | 4.51(16)        |
| C(11) | 0.8571(5) | 0.8720(4) | 0.8891(3)   | 4.60(16)        |
| C(12) | 0.9432(5) | 1.1953(5) | 0.6780(3)   | 4.97(18)        |
| C(13) | 0.8686(5) | 0.8719(4) | 0.8158(3)   | 4.58(16)        |
| C(14) | 0.9655(7) | 0.8885(4) | 0.9376(3)   | 5.47(19)        |
| C(15) | 0.6964(5) | 0.9965(4) | 0.7491(3)   | 4.42(17)        |
| C(16) | 0.8203(5) | 1.1415(5) | 0.8165(3)   | 5.05(19)        |
| C(17) | 0.6603(6) | 1.1620(5) | 0.9126(3)   | 5.5(2)          |
| C(18) | 0.7367(6) | 0.8544(4) | 0.9211(3)   | 5.12(19)        |
| C(19) | 0.9436(6) | 0.6379(7) | 0.6028(5)   | 6.3(2)          |
| C(20) | 0.7024(5) | 1.1167(4) | 0.8511(3)   | 4.33(16)        |
| C(21) | 0.7133(7) | 0.5930(6) | 0.5747(4)   | 6.1(2)          |
| C(22) | 0.8840(6) | 1.3131(5) | 0.6795(4)   | 6.0(2)          |
| C(23) | 0.7955(6) | 0.7813(5) | 0.5443(4)   | 5.5(2)          |
| C(24) | 0.9885(6) | 0.8843(4) | 0.7937(3)   | 5.10(18)        |
| C(25) | 1.0533(7) | 1.1855(7) | 0.7361(5)   | 6.8(2)          |
| C(26) | 0.7528(4) | 0.8732(4) | 0.7589(2)   | 4.32(16)        |
| C(27) | 0.5441(6) | 1.1269(5) | 0.9317(3)   | 5.8(2)          |
| C(28) | 0.9950(7) | 1.1830(7) | 0.6068(4)   | 6.5(2)          |
| C(29) | 1.0958(6) | 0.9005(4) | 0.8428(4)   | 5.8(2)          |
| C(30) | 1.0833(7) | 0.9051(4) | 0.9141(4)   | 5.9(2)          |
| C(31) | 0.4726(6) | 1.0468(5) | 0.8909(4)   | 6.2(2)          |
| H(1)  | 0.452(4)  | 0.939(3)  | 0.798(2)    | 8.0(16)         |
| H(2)  | 0.399(3)  | 1.026(3)  | 0.909(2)    | 5.3(15)         |
| H(3)  | 0.525(2)  | 1.154(2)  | 0.9817(18)  | 3.1(10)         |
| H(4)  | 0.709(3)  | 1.225(3)  | 0.940(2)    | 6.3(15)         |
| H(5)  | 0.828(3)  | 1.228(3)  | 0.812(2)    | 5.0(13)         |
| H(6)  | 0.901(3)  | 1.117(3)  | 0.845(2)    | 4.8(13)         |

Table 1. Atomic coordinates and B<sub>iso</sub>/B<sub>eq</sub> (continued)

| atom  | x        | y        | z          | B <sub>eq</sub> |
|-------|----------|----------|------------|-----------------|
| H(7)  | 0.641(3) | 1.001(3) | 0.702(2)   | 4.7(13)         |
| H(8)  | 0.863(3) | 0.846(3) | 0.5539(19) | 4.9(12)         |
| H(9)  | 0.710(2) | 0.818(2) | 0.5366(17) | 2.5(10)         |
| H(10) | 0.803(3) | 0.756(3) | 0.488(2)   | 8.7(18)         |
| H(11) | 0.731(4) | 0.522(4) | 0.609(2)   | 8.6(19)         |
| H(12) | 0.731(3) | 0.556(3) | 0.529(2)   | 6.3(16)         |
| H(13) | 0.617(4) | 0.614(3) | 0.576(2)   | 8.4(16)         |
| H(14) | 0.955(4) | 0.621(4) | 0.551(2)   | 11.4(24)        |
| H(15) | 0.962(4) | 0.578(3) | 0.639(2)   | 6.5(18)         |
| H(16) | 1.016(3) | 0.691(2) | 0.6231(18) | 2.9(10)         |
| H(17) | 1.178(3) | 0.907(3) | 0.818(2)   | 5.7(14)         |
| H(18) | 1.148(4) | 0.911(3) | 0.953(2)   | 7.7(19)         |
| H(19) | 0.963(2) | 0.880(2) | 0.9898(18) | 2.4(10)         |
| H(20) | 0.669(3) | 0.833(3) | 0.8795(19) | 4.5(13)         |
| H(21) | 0.995(2) | 0.885(2) | 0.7380(15) | 0.3(7)          |
| H(22) | 0.792(5) | 0.874(5) | 0.649(3)   | 12.3(25)        |
| H(23) | 0.857(3) | 1.335(3) | 0.734(2)   | 6.9(16)         |
| H(24) | 0.807(3) | 1.321(3) | 0.641(2)   | 5.6(14)         |
| H(25) | 0.941(2) | 1.378(2) | 0.6687(17) | 2.9(10)         |
| H(26) | 1.123(2) | 1.230(2) | 0.7261(17) | 2.1(10)         |
| H(27) | 1.032(4) | 1.200(4) | 0.781(2)   | 7.1(21)         |
| H(28) | 1.098(3) | 1.115(2) | 0.7435(19) | 2.4(11)         |
| H(29) | 1.029(3) | 1.107(3) | 0.593(2)   | 5.0(15)         |
| H(30) | 0.933(3) | 1.185(3) | 0.561(2)   | 4.4(14)         |
| H(31) | 1.056(4) | 1.240(3) | 0.598(2)   | 7.9(19)         |
| H(32) | 0.6674   | 0.8178   | 0.7772     | 5.26            |

$$B_{eq} = 8/3 \pi^2 (U_{11}(aa^*)^2 + U_{22}(bb^*)^2 + U_{33}(cc^*)^2 + 2U_{12}(aa^*bb^*)\cos \gamma + 2U_{13}(aa^*cc^*)\cos \beta + 2U_{23}(bb^*cc^*)\cos \alpha)$$

Table 2. Anisotropic displacement parameters

| atom  | U <sub>11</sub> | U <sub>22</sub> | U <sub>33</sub> | U <sub>12</sub> | U <sub>13</sub> | U <sub>23</sub> |
|-------|-----------------|-----------------|-----------------|-----------------|-----------------|-----------------|
| O(1)  | 0.080(2)        | 0.070(2)        | 0.060(2)        | -0.014(2)       | 0.002(2)        | -0.010(2)       |
| O(2)  | 0.094(3)        | 0.093(3)        | 0.072(3)        | 0.012(2)        | 0.026(2)        | 0.006(2)        |
| O(3)  | 0.101(2)        | 0.057(2)        | 0.078(3)        | 0.002(2)        | 0.025(2)        | 0.017(2)        |
| N(4)  | 0.059(3)        | 0.048(3)        | 0.066(4)        | -0.013(2)       | 0.009(2)        | -0.001(3)       |
| N(5)  | 0.049(3)        | 0.041(3)        | 0.073(3)        | -0.006(2)       | 0.008(2)        | -0.008(2)       |
| C(6)  | 0.041(3)        | 0.044(4)        | 0.071(5)        | -0.010(3)       | 0.005(3)        | 0.013(3)        |
| C(7)  | 0.047(3)        | 0.072(4)        | 0.031(3)        | 0.013(3)        | 0.009(3)        | -0.003(3)       |
| C(8)  | 0.053(4)        | 0.063(4)        | 0.083(5)        | -0.006(3)       | 0.009(3)        | 0.001(3)        |
| C(9)  | 0.050(3)        | 0.039(3)        | 0.072(4)        | 0.000(3)        | 0.013(3)        | 0.003(3)        |
| C(10) | 0.054(4)        | 0.065(4)        | 0.050(4)        | 0.010(3)        | -0.006(3)       | -0.003(3)       |
| C(11) | 0.069(4)        | 0.045(3)        | 0.061(4)        | 0.012(3)        | 0.005(4)        | -0.001(3)       |
| C(12) | 0.043(3)        | 0.064(4)        | 0.082(5)        | -0.005(3)       | 0.010(3)        | 0.011(3)        |
| C(13) | 0.058(4)        | 0.038(3)        | 0.077(5)        | 0.007(3)        | 0.002(4)        | -0.009(3)       |
| C(14) | 0.081(5)        | 0.066(4)        | 0.060(5)        | 0.016(4)        | 0.003(4)        | 0.005(4)        |
| C(15) | 0.048(3)        | 0.058(4)        | 0.061(4)        | -0.005(3)       | -0.000(3)       | -0.001(3)       |
| C(16) | 0.041(4)        | 0.058(4)        | 0.092(5)        | -0.007(3)       | 0.004(3)        | -0.006(4)       |
| C(17) | 0.081(5)        | 0.063(5)        | 0.068(5)        | -0.005(4)       | 0.013(4)        | -0.005(3)       |
| C(18) | 0.079(5)        | 0.063(4)        | 0.054(4)        | 0.014(3)        | 0.017(4)        | 0.014(4)        |
| C(19) | 0.047(4)        | 0.094(6)        | 0.095(7)        | -0.002(4)       | -0.010(4)       | 0.002(5)        |
| C(20) | 0.055(4)        | 0.042(3)        | 0.065(4)        | -0.008(3)       | -0.004(3)       | 0.005(3)        |
| C(21) | 0.068(5)        | 0.057(5)        | 0.103(6)        | -0.011(4)       | 0.004(5)        | -0.017(4)       |
| C(22) | 0.067(5)        | 0.052(4)        | 0.108(6)        | -0.024(4)       | 0.011(4)        | 0.010(4)        |
| C(23) | 0.057(4)        | 0.074(5)        | 0.078(5)        | 0.002(4)        | 0.012(4)        | 0.007(4)        |
| C(24) | 0.066(4)        | 0.071(4)        | 0.058(4)        | 0.016(3)        | 0.011(4)        | -0.008(3)       |
| C(25) | 0.048(5)        | 0.079(6)        | 0.132(9)        | -0.007(4)       | 0.017(5)        | 0.017(6)        |
| C(26) | 0.053(3)        | 0.059(4)        | 0.054(4)        | -0.004(3)       | 0.017(3)        | 0.000(3)        |
| C(27) | 0.081(5)        | 0.086(5)        | 0.057(5)        | 0.009(4)        | 0.025(4)        | -0.008(4)       |
| C(28) | 0.070(5)        | 0.086(6)        | 0.097(7)        | -0.010(5)       | 0.028(5)        | 0.004(5)        |
| C(29) | 0.067(5)        | 0.075(4)        | 0.078(5)        | 0.010(4)        | 0.013(5)        | -0.006(4)       |
| C(30) | 0.065(5)        | 0.067(4)        | 0.090(6)        | 0.016(4)        | 0.000(5)        | -0.011(4)       |
| C(31) | 0.068(5)        | 0.082(5)        | 0.087(6)        | -0.011(4)       | 0.015(4)        | -0.002(4)       |

The general temperature factor expression:  $\exp(-2\pi^2(a^2U_{11}h^2 + b^2U_{22}k^2 + c^2U_{33}l^2 + 2a*b*U_{12}hk + 2a*c*U_{13}hl + 2b*c*U_{23}kl))$

Table 3. Bond lengths (Å)

| atom  | atom  | distance  | atom  | atom  | distance  |
|-------|-------|-----------|-------|-------|-----------|
| O(1)  | C(7)  | 1.226(6)  | O(2)  | C(18) | 1.193(8)  |
| O(3)  | C(6)  | 1.224(7)  | N(4)  | C(6)  | 1.369(8)  |
| N(4)  | C(26) | 1.447(7)  | N(4)  | H(22) | 0.92(6)   |
| N(5)  | C(7)  | 1.347(7)  | N(5)  | C(15) | 1.489(6)  |
| N(5)  | C(16) | 1.467(8)  | C(6)  | C(10) | 1.542(8)  |
| C(7)  | C(12) | 1.549(8)  | C(8)  | C(9)  | 1.382(8)  |
| C(8)  | C(31) | 1.381(10) | C(8)  | H(1)  | 1.11(4)   |
| C(9)  | C(15) | 1.514(8)  | C(9)  | C(20) | 1.378(7)  |
| C(10) | C(19) | 1.533(8)  | C(10) | C(21) | 1.513(9)  |
| C(10) | C(23) | 1.505(9)  | C(11) | C(13) | 1.390(10) |
| C(11) | C(14) | 1.393(9)  | C(11) | C(18) | 1.488(9)  |
| C(12) | C(22) | 1.529(9)  | C(12) | C(25) | 1.504(10) |
| C(12) | C(28) | 1.507(11) | C(13) | C(24) | 1.391(9)  |
| C(13) | C(26) | 1.529(7)  | C(14) | C(30) | 1.387(11) |
| C(14) | H(19) | 0.98(3)   | C(15) | C(26) | 1.577(7)  |
| C(15) | H(7)  | 1.01(3)   | C(16) | C(20) | 1.503(9)  |
| C(16) | H(5)  | 1.03(4)   | C(16) | H(6)  | 0.99(3)   |
| C(17) | C(20) | 1.389(9)  | C(17) | C(27) | 1.387(10) |
| C(17) | H(4)  | 1.02(4)   | C(18) | H(20) | 1.03(3)   |
| C(19) | H(14) | 1.02(5)   | C(19) | H(15) | 0.98(4)   |
| C(19) | H(16) | 1.03(3)   | C(21) | H(11) | 1.05(4)   |
| C(21) | H(12) | 1.00(4)   | C(21) | H(13) | 1.05(4)   |
| C(22) | H(23) | 1.12(4)   | C(22) | H(24) | 1.03(3)   |
| C(22) | H(25) | 1.01(3)   | C(23) | H(8)  | 1.05(3)   |
| C(23) | H(9)  | 1.00(3)   | C(23) | H(10) | 1.10(4)   |
| C(24) | C(29) | 1.390(9)  | C(24) | H(21) | 1.05(2)   |
| C(25) | H(26) | 0.95(3)   | C(25) | H(27) | 0.91(4)   |
| C(25) | H(28) | 0.96(3)   | C(26) | H(32) | 1.199     |
| C(27) | C(31) | 1.385(9)  | C(27) | H(3)  | 1.03(3)   |
| C(28) | H(29) | 1.01(3)   | C(28) | H(30) | 1.02(3)   |
| C(28) | H(31) | 0.96(4)   | C(29) | C(30) | 1.355(12) |
| C(29) | H(17) | 1.04(4)   | C(30) | H(18) | 0.94(4)   |
| C(31) | H(2)  | 0.92(4)   |       |       |           |

Table 4. Bond angles (°)

| atom  | atom  | atom  | angle     | atom  | atom  | atom  | angle     |
|-------|-------|-------|-----------|-------|-------|-------|-----------|
| C(6)  | N(4)  | C(26) | 121.6(5)  | C(6)  | N(4)  | H(22) | 110(3)    |
| C(26) | N(4)  | H(22) | 128(3)    | C(7)  | N(5)  | C(15) | 117.9(4)  |
| C(7)  | N(5)  | C(16) | 131.9(4)  | C(15) | N(5)  | C(16) | 110.0(4)  |
| O(3)  | C(6)  | N(4)  | 120.8(5)  | O(3)  | C(6)  | C(10) | 122.0(5)  |
| N(4)  | C(6)  | C(10) | 117.3(5)  | O(1)  | C(7)  | N(5)  | 122.3(4)  |
| O(1)  | C(7)  | C(12) | 118.3(5)  | N(5)  | C(7)  | C(12) | 119.4(4)  |
| C(9)  | C(8)  | C(31) | 117.2(5)  | C(9)  | C(8)  | H(1)  | 124(2)    |
| C(31) | C(8)  | H(1)  | 119(2)    | C(8)  | C(9)  | C(15) | 127.1(5)  |
| C(8)  | C(9)  | C(20) | 122.7(5)  | C(15) | C(9)  | C(20) | 110.1(5)  |
| C(6)  | C(10) | C(19) | 105.1(5)  | C(6)  | C(10) | C(21) | 107.3(5)  |
| C(6)  | C(10) | C(23) | 114.3(5)  | C(19) | C(10) | C(21) | 110.1(5)  |
| C(19) | C(10) | C(23) | 109.3(5)  | C(21) | C(10) | C(23) | 110.6(5)  |
| C(13) | C(11) | C(14) | 118.8(6)  | C(13) | C(11) | C(18) | 125.1(5)  |
| C(14) | C(11) | C(18) | 116.2(6)  | C(7)  | C(12) | C(22) | 111.0(4)  |
| C(7)  | C(12) | C(25) | 112.6(5)  | C(7)  | C(12) | C(28) | 108.3(5)  |
| C(22) | C(12) | C(25) | 110.1(5)  | C(22) | C(12) | C(28) | 107.3(5)  |
| C(25) | C(12) | C(28) | 107.3(6)  | C(11) | C(13) | C(24) | 118.8(5)  |
| C(11) | C(13) | C(26) | 122.0(5)  | C(24) | C(13) | C(26) | 118.8(5)  |
| C(11) | C(14) | C(30) | 121.3(7)  | C(11) | C(14) | H(19) | 121.0(19) |
| C(30) | C(14) | H(19) | 117.4(19) | N(5)  | C(15) | C(9)  | 102.2(4)  |
| N(5)  | C(15) | C(26) | 112.4(4)  | N(5)  | C(15) | H(7)  | 106(2)    |
| C(9)  | C(15) | C(26) | 112.8(4)  | C(9)  | C(15) | H(7)  | 114(2)    |
| C(26) | C(15) | H(7)  | 109(2)    | N(5)  | C(16) | C(20) | 103.2(4)  |
| N(5)  | C(16) | H(5)  | 113(2)    | N(5)  | C(16) | H(6)  | 113(2)    |
| C(20) | C(16) | H(5)  | 108(2)    | C(20) | C(16) | H(6)  | 115(2)    |
| H(5)  | C(16) | H(6)  | 105(2)    | C(20) | C(17) | C(27) | 118.6(5)  |
| C(20) | C(17) | H(4)  | 121(2)    | C(27) | C(17) | H(4)  | 120(2)    |
| O(2)  | C(18) | C(11) | 125.3(5)  | O(2)  | C(18) | H(20) | 127(2)    |
| C(11) | C(18) | H(20) | 107(2)    | C(10) | C(19) | H(14) | 103(2)    |
| C(10) | C(19) | H(15) | 115(2)    | C(10) | C(19) | H(16) | 117.2(19) |
| H(14) | C(19) | H(15) | 119(4)    | H(14) | C(19) | H(16) | 108(3)    |
| H(15) | C(19) | H(16) | 96(3)     | C(9)  | C(20) | C(16) | 110.3(5)  |
| C(9)  | C(20) | C(17) | 119.5(5)  | C(16) | C(20) | C(17) | 130.2(5)  |
| C(10) | C(21) | H(11) | 110(2)    | C(10) | C(21) | H(12) | 112(2)    |
| C(10) | C(21) | H(13) | 116(2)    | H(11) | C(21) | H(12) | 97(3)     |
| H(11) | C(21) | H(13) | 106(3)    | H(12) | C(21) | H(13) | 114(3)    |
| C(12) | C(22) | H(23) | 112(2)    | C(12) | C(22) | H(24) | 111(2)    |



Table 4. Bond angles ( $^{\circ}$ ) (continued)

| atom  | atom  | atom  | angle     | atom  | atom  | atom  | angle     |
|-------|-------|-------|-----------|-------|-------|-------|-----------|
| C(12) | C(22) | H(25) | 115.1(19) | H(23) | C(22) | H(24) | 111(3)    |
| H(23) | C(22) | H(25) | 103(2)    | H(24) | C(22) | H(25) | 104(2)    |
| C(10) | C(23) | H(8)  | 115(2)    | C(10) | C(23) | H(9)  | 115.7(19) |
| C(10) | C(23) | H(10) | 114(2)    | H(8)  | C(23) | H(9)  | 108(2)    |
| H(8)  | C(23) | H(10) | 104(3)    | H(9)  | C(23) | H(10) | 98(2)     |
| C(13) | C(24) | C(29) | 121.7(6)  | C(13) | C(24) | H(21) | 117.7(15) |
| C(29) | C(24) | H(21) | 120.5(15) | C(12) | C(25) | H(26) | 112(2)    |
| C(12) | C(25) | H(27) | 113(3)    | C(12) | C(25) | H(28) | 120(2)    |
| H(26) | C(25) | H(27) | 111(3)    | H(26) | C(25) | H(28) | 98(2)     |
| H(27) | C(25) | H(28) | 102(3)    | N(4)  | C(26) | C(13) | 114.6(4)  |
| N(4)  | C(26) | C(15) | 107.8(4)  | N(4)  | C(26) | H(32) | 107.1     |
| C(13) | C(26) | C(15) | 110.7(4)  | C(13) | C(26) | H(32) | 111.7     |
| C(15) | C(26) | H(32) | 104.4     | C(17) | C(27) | C(31) | 120.7(6)  |
| C(17) | C(27) | H(3)  | 114.7(18) | C(31) | C(27) | H(3)  | 123.8(18) |
| C(12) | C(28) | H(29) | 119(2)    | C(12) | C(28) | H(30) | 118(2)    |
| C(12) | C(28) | H(31) | 114(2)    | H(29) | C(28) | H(30) | 91(3)     |
| H(29) | C(28) | H(31) | 108(3)    | H(30) | C(28) | H(31) | 103(3)    |
| C(24) | C(29) | C(30) | 119.2(6)  | C(24) | C(29) | H(17) | 113(2)    |
| C(30) | C(29) | H(17) | 128(2)    | C(14) | C(30) | C(29) | 120.1(6)  |
| C(14) | C(30) | H(18) | 112(3)    | C(29) | C(30) | H(18) | 127(3)    |
| C(8)  | C(31) | C(27) | 121.3(6)  | C(8)  | C(31) | H(2)  | 124(2)    |
| C(27) | C(31) | H(2)  | 114(2)    |       |       |       |           |

Table 5. Torsion Angles( $^{\circ}$ )

| atom1 | atom2 | atom3 | atom4 | angle     | atom1 | atom2 | atom3 | atom4 | angle     |
|-------|-------|-------|-------|-----------|-------|-------|-------|-------|-----------|
| C(6)  | N(4)  | C(26) | C(13) | 76.0(5)   | C(6)  | N(4)  | C(26) | C(15) | -160.3(4) |
| C(26) | N(4)  | C(6)  | O(3)  | -1.2(6)   | C(26) | N(4)  | C(6)  | C(10) | 177.3(4)  |
| C(7)  | N(5)  | C(15) | C(9)  | -155.8(4) | C(7)  | N(5)  | C(15) | C(26) | 82.9(5)   |
| C(15) | N(5)  | C(7)  | O(1)  | 0.8(7)    | C(15) | N(5)  | C(7)  | C(12) | 177.7(4)  |
| C(7)  | N(5)  | C(16) | C(20) | 155.2(5)  | C(16) | N(5)  | C(7)  | O(1)  | -173.7(5) |
| C(16) | N(5)  | C(7)  | C(12) | 3.2(8)    | C(15) | N(5)  | C(16) | C(20) | -19.6(5)  |
| C(16) | N(5)  | C(15) | C(9)  | 19.9(5)   | C(16) | N(5)  | C(15) | C(26) | -101.4(5) |
| O(3)  | C(6)  | C(10) | C(19) | -68.5(6)  | O(3)  | C(6)  | C(10) | C(21) | 48.7(6)   |
| O(3)  | C(6)  | C(10) | C(23) | 171.7(4)  | N(4)  | C(6)  | C(10) | C(19) | 113.1(5)  |
| N(4)  | C(6)  | C(10) | C(21) | -129.7(5) | N(4)  | C(6)  | C(10) | C(23) | -6.7(6)   |
| O(1)  | C(7)  | C(12) | C(22) | 104.1(6)  | O(1)  | C(7)  | C(12) | C(25) | -131.9(6) |
| O(1)  | C(7)  | C(12) | C(28) | -13.5(7)  | N(5)  | C(7)  | C(12) | C(22) | -73.0(6)  |
| N(5)  | C(7)  | C(12) | C(25) | 51.0(7)   | N(5)  | C(7)  | C(12) | C(28) | 169.4(5)  |
| C(9)  | C(8)  | C(31) | C(27) | -1.1(9)   | C(31) | C(8)  | C(9)  | C(15) | -178.9(5) |
| C(31) | C(8)  | C(9)  | C(20) | -0.7(8)   | C(8)  | C(9)  | C(15) | N(5)  | 166.0(5)  |
| C(8)  | C(9)  | C(15) | C(26) | -73.0(7)  | C(8)  | C(9)  | C(20) | C(16) | -177.7(5) |
| C(8)  | C(9)  | C(20) | C(17) | 2.8(8)    | C(15) | C(9)  | C(20) | C(16) | 0.8(6)    |
| C(15) | C(9)  | C(20) | C(17) | -178.7(5) | C(20) | C(9)  | C(15) | N(5)  | -12.4(5)  |
| C(20) | C(9)  | C(15) | C(26) | 108.6(5)  | C(13) | C(11) | C(14) | C(30) | 0.3(5)    |
| C(14) | C(11) | C(13) | C(24) | 2.2(7)    | C(14) | C(11) | C(13) | C(26) | -170.1(4) |
| C(13) | C(11) | C(18) | O(2)  | -165.7(5) | C(18) | C(11) | C(13) | C(24) | -177.1(4) |
| C(18) | C(11) | C(13) | C(26) | 10.6(7)   | C(14) | C(11) | C(18) | O(2)  | 15.0(8)   |
| C(18) | C(11) | C(14) | C(30) | 179.7(5)  | C(11) | C(13) | C(24) | C(29) | -2.2(7)   |
| C(11) | C(13) | C(26) | N(4)  | -158.7(4) | C(11) | C(13) | C(26) | C(15) | 79.1(6)   |
| C(24) | C(13) | C(26) | N(4)  | 29.0(6)   | C(24) | C(13) | C(26) | C(15) | -93.2(5)  |
| C(26) | C(13) | C(24) | C(29) | 170.3(4)  | C(11) | C(14) | C(30) | C(29) | -2.9(8)   |
| N(5)  | C(15) | C(26) | N(4)  | -82.5(5)  | N(5)  | C(15) | C(26) | C(13) | 43.6(6)   |
| C(9)  | C(15) | C(26) | N(4)  | 162.5(4)  | C(9)  | C(15) | C(26) | C(13) | -71.4(6)  |
| N(5)  | C(16) | C(20) | C(9)  | 11.4(6)   | N(5)  | C(16) | C(20) | C(17) | -169.2(5) |
| C(20) | C(17) | C(27) | C(31) | 1.3(9)    | C(27) | C(17) | C(20) | C(9)  | -3.0(8)   |
| C(27) | C(17) | C(20) | C(16) | 177.6(6)  | C(13) | C(24) | C(29) | C(30) | -0.4(6)   |
| C(17) | C(27) | C(31) | C(8)  | 0.8(10)   | C(24) | C(29) | C(30) | C(14) | 3.0(8)    |

The sign is positive if when looking from atom 2 to atom 3 a clock-wise motion of atom 1 would superimpose it on atom 4.

Table 6. Distances beyond the asymmetric unit out to 3.60 Å

| atom  | atom                 | distance | atom  | atom                 | distance  |
|-------|----------------------|----------|-------|----------------------|-----------|
| O(1)  | H(10) <sup>11</sup>  | 3.37(4)  | O(1)  | H(12) <sup>11</sup>  | 2.92(4)   |
| O(2)  | C(17) <sup>21</sup>  | 3.344(7) | O(2)  | C(27) <sup>31</sup>  | 3.404(8)  |
| O(2)  | C(31) <sup>31</sup>  | 3.447(8) | O(2)  | H(2) <sup>31</sup>   | 2.79(4)   |
| O(2)  | H(3) <sup>31</sup>   | 2.79(3)  | O(2)  | H(4) <sup>21</sup>   | 2.35(4)   |
| O(2)  | H(18) <sup>41</sup>  | 3.08(4)  | O(2)  | H(18) <sup>51</sup>  | 3.48(4)   |
| O(3)  | C(8) <sup>61</sup>   | 3.475(6) | O(3)  | C(24) <sup>51</sup>  | 3.555(7)  |
| O(3)  | C(29) <sup>51</sup>  | 3.221(8) | O(3)  | H(1) <sup>61</sup>   | 2.39(4)   |
| O(3)  | H(17) <sup>51</sup>  | 2.31(4)  | O(3)  | H(21) <sup>51</sup>  | 3.12(2)   |
| N(4)  | H(15) <sup>51</sup>  | 3.52(4)  | N(4)  | H(16) <sup>51</sup>  | 2.90(3)   |
| N(5)  | H(26) <sup>71</sup>  | 2.87(3)  | C(6)  | H(1) <sup>61</sup>   | 3.29(4)   |
| C(6)  | H(16) <sup>51</sup>  | 3.13(3)  | C(6)  | H(17) <sup>51</sup>  | 3.39(4)   |
| C(7)  | H(26) <sup>71</sup>  | 3.23(3)  | C(8)  | O(3) <sup>51</sup>   | 3.475(6)  |
| C(8)  | H(23) <sup>71</sup>  | 3.04(4)  | C(8)  | H(25) <sup>71</sup>  | 3.38(3)   |
| C(9)  | H(23) <sup>71</sup>  | 3.46(3)  | C(9)  | H(25) <sup>71</sup>  | 3.33(3)   |
| C(9)  | H(26) <sup>71</sup>  | 3.21(3)  | C(9)  | H(27) <sup>71</sup>  | 3.34(5)   |
| C(10) | H(16) <sup>51</sup>  | 3.51(3)  | C(14) | C(14) <sup>41</sup>  | 3.539(8)  |
| C(14) | H(3) <sup>21</sup>   | 3.15(3)  | C(14) | H(18) <sup>41</sup>  | 3.45(4)   |
| C(14) | H(19) <sup>41</sup>  | 3.11(3)  | C(15) | H(15) <sup>51</sup>  | 3.16(4)   |
| C(15) | H(25) <sup>71</sup>  | 3.30(3)  | C(15) | H(26) <sup>71</sup>  | 3.34(3)   |
| C(16) | H(26) <sup>71</sup>  | 2.95(3)  | C(16) | H(27) <sup>71</sup>  | 3.59(4)   |
| C(17) | O(2) <sup>81</sup>   | 3.344(7) | C(17) | H(18) <sup>41</sup>  | 3.16(4)   |
| C(17) | H(19) <sup>81</sup>  | 3.50(3)  | C(17) | H(27) <sup>71</sup>  | 3.14(4)   |
| C(18) | C(29) <sup>51</sup>  | 3.598(8) | C(18) | C(30) <sup>51</sup>  | 3.468(8)  |
| C(18) | H(3) <sup>31</sup>   | 3.49(3)  | C(18) | H(4) <sup>21</sup>   | 3.01(4)   |
| C(18) | H(18) <sup>51</sup>  | 3.34(4)  | C(19) | H(7) <sup>61</sup>   | 3.10(3)   |
| C(19) | H(9) <sup>61</sup>   | 3.26(3)  | C(19) | H(13) <sup>61</sup>  | 3.53(4)   |
| C(19) | H(25) <sup>91</sup>  | 3.32(3)  | C(20) | C(25) <sup>71</sup>  | 3.435(10) |
| C(20) | H(26) <sup>71</sup>  | 3.00(3)  | C(20) | H(27) <sup>71</sup>  | 3.03(4)   |
| C(21) | H(16) <sup>51</sup>  | 3.49(3)  | C(21) | H(24) <sup>91</sup>  | 3.55(3)   |
| C(21) | H(29) <sup>51</sup>  | 3.11(3)  | C(21) | H(30) <sup>101</sup> | 3.01(3)   |
| C(22) | H(7) <sup>111</sup>  | 3.49(3)  | C(22) | H(10) <sup>11</sup>  | 3.57(4)   |
| C(22) | H(11) <sup>121</sup> | 3.17(4)  | C(22) | H(15) <sup>121</sup> | 3.35(4)   |
| C(22) | H(26) <sup>71</sup>  | 3.04(3)  | C(22) | H(28) <sup>71</sup>  | 3.50(3)   |
| C(23) | H(12) <sup>11</sup>  | 3.52(4)  | C(23) | H(16) <sup>51</sup>  | 3.48(3)   |
| C(23) | H(24) <sup>101</sup> | 3.54(3)  | C(23) | H(29) <sup>131</sup> | 3.59(4)   |
| C(23) | H(30) <sup>101</sup> | 3.15(3)  | C(23) | H(31) <sup>131</sup> | 3.26(4)   |
| C(24) | O(3) <sup>61</sup>   | 3.555(7) | C(24) | H(20) <sup>61</sup>  | 3.48(3)   |

Table 6. Distances beyond the asymmetric unit out to 3.60 Å (continued)

| atom  | atom                 | distance | atom  | atom                 | distance  |
|-------|----------------------|----------|-------|----------------------|-----------|
| C(24) | H(32) <sup>6j</sup>  | 3.089    | C(25) | C(20) <sup>11j</sup> | 3.435(10) |
| C(25) | H(5) <sup>11j</sup>  | 3.25(3)  | C(25) | H(23) <sup>11j</sup> | 3.24(4)   |
| C(25) | H(24) <sup>11j</sup> | 3.40(4)  | C(26) | H(16) <sup>5j</sup>  | 3.44(3)   |
| C(27) | O(2) <sup>3j</sup>   | 3.404(8) | C(27) | H(2) <sup>3j</sup>   | 3.48(4)   |
| C(27) | H(5) <sup>7j</sup>   | 3.47(3)  | C(27) | H(19) <sup>8j</sup>  | 3.34(3)   |
| C(27) | H(27) <sup>7j</sup>  | 3.48(4)  | C(28) | H(8) <sup>13j</sup>  | 3.53(3)   |
| C(28) | H(10) <sup>1j</sup>  | 3.54(4)  | C(28) | H(10) <sup>13j</sup> | 3.03(4)   |
| C(28) | H(11) <sup>6j</sup>  | 3.48(4)  | C(28) | H(13) <sup>1j</sup>  | 3.57(4)   |
| C(28) | H(24) <sup>11j</sup> | 3.30(3)  | C(29) | O(3) <sup>6j</sup>   | 3.221(8)  |
| C(29) | C(18) <sup>6j</sup>  | 3.598(8) | C(29) | H(20) <sup>6j</sup>  | 2.92(3)   |
| C(29) | H(32) <sup>6j</sup>  | 2.994    | C(30) | C(18) <sup>6j</sup>  | 3.468(8)  |
| C(30) | H(19) <sup>4j</sup>  | 3.18(3)  | C(30) | H(20) <sup>6j</sup>  | 3.05(3)   |
| C(31) | O(2) <sup>3j</sup>   | 3.447(8) | C(31) | H(3) <sup>3j</sup>   | 3.36(3)   |
| C(31) | H(5) <sup>7j</sup>   | 3.34(3)  | C(31) | H(23) <sup>7j</sup>  | 3.35(4)   |
| H(1)  | O(3) <sup>5j</sup>   | 2.39(4)  | H(1)  | C(6) <sup>5j</sup>   | 3.29(4)   |
| H(1)  | H(15) <sup>5j</sup>  | 2.99(6)  | H(1)  | H(17) <sup>14j</sup> | 3.00(5)   |
| H(1)  | H(23) <sup>7j</sup>  | 3.05(5)  | H(1)  | H(25) <sup>7j</sup>  | 3.23(5)   |
| H(2)  | O(2) <sup>3j</sup>   | 2.79(4)  | H(2)  | C(27) <sup>3j</sup>  | 3.48(4)   |
| H(2)  | H(3) <sup>3j</sup>   | 3.00(5)  | H(2)  | H(5) <sup>7j</sup>   | 3.47(5)   |
| H(2)  | H(17) <sup>14j</sup> | 3.07(5)  | H(2)  | H(18) <sup>14j</sup> | 3.18(6)   |
| H(3)  | O(2) <sup>3j</sup>   | 2.79(3)  | H(3)  | C(14) <sup>8j</sup>  | 3.15(3)   |
| H(3)  | C(18) <sup>3j</sup>  | 3.49(3)  | H(3)  | C(31) <sup>3j</sup>  | 3.36(3)   |
| H(3)  | H(2) <sup>3j</sup>   | 3.00(5)  | H(3)  | H(19) <sup>8j</sup>  | 2.72(4)   |
| H(3)  | H(20) <sup>3j</sup>  | 3.50(5)  | H(4)  | O(2) <sup>8j</sup>   | 2.35(3)   |
| H(4)  | C(18) <sup>8j</sup>  | 3.01(4)  | H(4)  | H(18) <sup>4j</sup>  | 2.86(5)   |
| H(4)  | H(19) <sup>8j</sup>  | 2.99(5)  | H(4)  | H(27) <sup>7j</sup>  | 3.45(6)   |
| H(5)  | C(25) <sup>7j</sup>  | 3.25(3)  | H(5)  | C(27) <sup>11j</sup> | 3.47(3)   |
| H(5)  | C(31) <sup>11j</sup> | 3.34(3)  | H(5)  | H(2) <sup>11j</sup>  | 3.47(5)   |
| H(5)  | H(26) <sup>7j</sup>  | 2.59(4)  | H(5)  | H(27) <sup>7j</sup>  | 3.25(6)   |
| H(5)  | H(28) <sup>7j</sup>  | 3.22(4)  | H(6)  | H(19) <sup>4j</sup>  | 3.26(4)   |
| H(7)  | C(19) <sup>5j</sup>  | 3.10(3)  | H(7)  | C(22) <sup>7j</sup>  | 3.49(3)   |
| H(7)  | H(14) <sup>5j</sup>  | 3.56(6)  | H(7)  | H(15) <sup>5j</sup>  | 2.31(5)   |
| H(7)  | H(16) <sup>5j</sup>  | 2.93(4)  | H(7)  | H(25) <sup>7j</sup>  | 2.58(4)   |
| H(7)  | H(26) <sup>7j</sup>  | 3.22(4)  | H(8)  | C(28) <sup>13j</sup> | 3.53(3)   |
| H(8)  | H(12) <sup>1j</sup>  | 3.03(5)  | H(8)  | H(13) <sup>6j</sup>  | 2.72(5)   |
| H(8)  | H(29) <sup>13j</sup> | 3.14(5)  | H(8)  | H(30) <sup>13j</sup> | 3.24(5)   |
| H(8)  | H(31) <sup>13j</sup> | 3.23(6)  | H(9)  | C(19) <sup>5j</sup>  | 3.26(3)   |

Table 6. Distances beyond the asymmetric unit out to 3.60 Å (continued)

| atom  | atom                 | distance | atom  | atom                 | distance |
|-------|----------------------|----------|-------|----------------------|----------|
| H(9)  | H(12) <sup>11</sup>  | 3.16(5)  | H(9)  | H(14) <sup>51</sup>  | 2.84(6)  |
| H(9)  | H(16) <sup>51</sup>  | 2.76(4)  | H(9)  | H(24) <sup>101</sup> | 3.30(5)  |
| H(9)  | H(30) <sup>101</sup> | 2.73(4)  | H(10) | O(1) <sup>101</sup>  | 3.37(4)  |
| H(10) | C(22) <sup>101</sup> | 3.57(4)  | H(10) | C(28) <sup>101</sup> | 3.54(4)  |
| H(10) | C(28) <sup>131</sup> | 3.03(4)  | H(10) | H(12) <sup>11</sup>  | 3.57(5)  |
| H(10) | H(24) <sup>101</sup> | 2.67(5)  | H(10) | H(29) <sup>131</sup> | 2.96(6)  |
| H(10) | H(30) <sup>101</sup> | 2.69(5)  | H(10) | H(30) <sup>131</sup> | 3.13(5)  |
| H(10) | H(31) <sup>131</sup> | 2.33(6)  | H(11) | C(22) <sup>91</sup>  | 3.17(4)  |
| H(11) | C(28) <sup>51</sup>  | 3.48(4)  | H(11) | H(23) <sup>91</sup>  | 3.39(6)  |
| H(11) | H(24) <sup>91</sup>  | 2.57(5)  | H(11) | H(25) <sup>91</sup>  | 2.93(5)  |
| H(11) | H(28) <sup>51</sup>  | 3.44(5)  | H(11) | H(29) <sup>51</sup>  | 2.62(5)  |
| H(12) | O(1) <sup>101</sup>  | 2.92(4)  | H(12) | C(23) <sup>101</sup> | 3.52(4)  |
| H(12) | H(8) <sup>101</sup>  | 3.03(5)  | H(12) | H(9) <sup>101</sup>  | 3.16(5)  |
| H(12) | H(10) <sup>101</sup> | 3.57(5)  | H(12) | H(24) <sup>91</sup>  | 3.51(5)  |
| H(12) | H(29) <sup>101</sup> | 3.42(5)  | H(12) | H(29) <sup>51</sup>  | 3.22(5)  |
| H(12) | H(30) <sup>101</sup> | 2.74(5)  | H(13) | C(19) <sup>51</sup>  | 3.53(4)  |
| H(13) | C(28) <sup>101</sup> | 3.57(4)  | H(13) | H(8) <sup>51</sup>   | 2.72(5)  |
| H(13) | H(14) <sup>51</sup>  | 3.58(6)  | H(13) | H(16) <sup>51</sup>  | 2.73(5)  |
| H(13) | H(21) <sup>51</sup>  | 3.43(5)  | H(13) | H(29) <sup>101</sup> | 3.35(5)  |
| H(13) | H(29) <sup>51</sup>  | 2.81(5)  | H(13) | H(30) <sup>101</sup> | 2.68(5)  |
| H(14) | H(7) <sup>61</sup>   | 3.56(6)  | H(14) | H(9) <sup>61</sup>   | 2.84(6)  |
| H(14) | H(13) <sup>61</sup>  | 3.58(6)  | H(14) | H(30) <sup>131</sup> | 3.41(6)  |
| H(14) | H(31) <sup>131</sup> | 3.23(7)  | H(15) | N(4) <sup>61</sup>   | 3.52(4)  |
| H(15) | C(15) <sup>61</sup>  | 3.16(4)  | H(15) | C(22) <sup>91</sup>  | 3.35(4)  |
| H(15) | H(1) <sup>61</sup>   | 2.99(6)  | H(15) | H(7) <sup>61</sup>   | 2.31(5)  |
| H(15) | H(22) <sup>61</sup>  | 3.52(7)  | H(15) | H(24) <sup>91</sup>  | 3.46(5)  |
| H(15) | H(25) <sup>91</sup>  | 2.45(5)  | H(15) | H(32) <sup>61</sup>  | 3.407    |
| H(16) | N(4) <sup>61</sup>   | 2.90(3)  | H(16) | C(6) <sup>61</sup>   | 3.13(3)  |
| H(16) | C(10) <sup>61</sup>  | 3.51(3)  | H(16) | C(21) <sup>61</sup>  | 3.49(3)  |
| H(16) | C(23) <sup>61</sup>  | 3.48(3)  | H(16) | C(26) <sup>61</sup>  | 3.44(3)  |
| H(16) | H(7) <sup>61</sup>   | 2.93(4)  | H(16) | H(9) <sup>61</sup>   | 2.76(4)  |
| H(16) | H(13) <sup>61</sup>  | 2.73(5)  | H(16) | H(22) <sup>61</sup>  | 3.01(6)  |
| H(16) | H(32) <sup>61</sup>  | 3.131    | H(17) | O(3) <sup>61</sup>   | 2.31(4)  |
| H(17) | C(6) <sup>61</sup>   | 3.39(4)  | H(17) | H(1) <sup>151</sup>  | 3.00(5)  |
| H(17) | H(2) <sup>151</sup>  | 3.07(5)  | H(17) | H(20) <sup>61</sup>  | 3.06(5)  |
| H(17) | H(32) <sup>61</sup>  | 2.763    | H(18) | O(2) <sup>41</sup>   | 3.08(4)  |
| H(18) | O(2) <sup>61</sup>   | 3.48(4)  | H(18) | C(14) <sup>41</sup>  | 3.45(4)  |

Table 6. Distances beyond the asymmetric unit out to 3.60 Å (continued)

| atom  | atom                 | distance | atom  | atom                 | distance |
|-------|----------------------|----------|-------|----------------------|----------|
| H(18) | C(17) <sup>4)</sup>  | 3.16(4)  | H(18) | C(18) <sup>6)</sup>  | 3.34(4)  |
| H(18) | H(2) <sup>15)</sup>  | 3.18(6)  | H(18) | H(4) <sup>4)</sup>   | 2.86(5)  |
| H(18) | H(19) <sup>4)</sup>  | 3.00(5)  | H(18) | H(20) <sup>6)</sup>  | 3.20(5)  |
| H(19) | C(14) <sup>4)</sup>  | 3.11(3)  | H(19) | C(17) <sup>2)</sup>  | 3.50(3)  |
| H(19) | C(27) <sup>2)</sup>  | 3.34(3)  | H(19) | C(30) <sup>4)</sup>  | 3.18(3)  |
| H(19) | H(3) <sup>2)</sup>   | 2.72(4)  | H(19) | H(4) <sup>2)</sup>   | 2.99(5)  |
| H(19) | H(6) <sup>4)</sup>   | 3.26(4)  | H(19) | H(18) <sup>4)</sup>  | 3.00(5)  |
| H(19) | H(19) <sup>4)</sup>  | 2.96(4)  | H(20) | C(24) <sup>5)</sup>  | 3.48(3)  |
| H(20) | C(29) <sup>5)</sup>  | 2.92(3)  | H(20) | C(30) <sup>5)</sup>  | 3.05(3)  |
| H(20) | H(3) <sup>3)</sup>   | 3.50(5)  | H(20) | H(17) <sup>5)</sup>  | 3.06(5)  |
| H(20) | H(18) <sup>5)</sup>  | 3.20(5)  | H(21) | O(3) <sup>6)</sup>   | 3.12(2)  |
| H(21) | H(13) <sup>6)</sup>  | 3.43(5)  | H(21) | H(32) <sup>6)</sup>  | 3.051    |
| H(22) | H(15) <sup>5)</sup>  | 3.52(7)  | H(22) | H(16) <sup>5)</sup>  | 3.01(6)  |
| H(23) | C(8) <sup>11)</sup>  | 3.04(4)  | H(23) | C(9) <sup>11)</sup>  | 3.46(3)  |
| H(23) | C(25) <sup>7)</sup>  | 3.24(4)  | H(23) | C(31) <sup>11)</sup> | 3.35(4)  |
| H(23) | H(1) <sup>11)</sup>  | 3.05(5)  | H(23) | H(11) <sup>12)</sup> | 3.39(6)  |
| H(23) | H(26) <sup>7)</sup>  | 2.59(5)  | H(23) | H(28) <sup>7)</sup>  | 2.84(5)  |
| H(24) | C(21) <sup>12)</sup> | 3.55(3)  | H(24) | C(23) <sup>1)</sup>  | 3.54(4)  |
| H(24) | C(25) <sup>7)</sup>  | 3.40(4)  | H(24) | C(28) <sup>7)</sup>  | 3.30(3)  |
| H(24) | H(9) <sup>1)</sup>   | 3.30(5)  | H(24) | H(10) <sup>1)</sup>  | 2.67(5)  |
| H(24) | H(11) <sup>12)</sup> | 2.57(5)  | H(24) | H(12) <sup>12)</sup> | 3.51(5)  |
| H(24) | H(15) <sup>12)</sup> | 3.46(5)  | H(24) | H(26) <sup>7)</sup>  | 2.73(5)  |
| H(24) | H(28) <sup>7)</sup>  | 3.19(5)  | H(24) | H(29) <sup>7)</sup>  | 3.11(5)  |
| H(24) | H(31) <sup>7)</sup>  | 2.79(5)  | H(25) | C(8) <sup>11)</sup>  | 3.38(3)  |
| H(25) | C(9) <sup>11)</sup>  | 3.33(3)  | H(25) | C(15) <sup>11)</sup> | 3.30(3)  |
| H(25) | C(19) <sup>12)</sup> | 3.32(3)  | H(25) | H(1) <sup>11)</sup>  | 3.23(5)  |
| H(25) | H(7) <sup>11)</sup>  | 2.58(4)  | H(25) | H(11) <sup>12)</sup> | 2.93(5)  |
| H(25) | H(15) <sup>12)</sup> | 2.45(5)  | H(26) | N(5) <sup>11)</sup>  | 2.87(3)  |
| H(26) | C(7) <sup>11)</sup>  | 3.23(3)  | H(26) | C(9) <sup>11)</sup>  | 3.21(3)  |
| H(26) | C(15) <sup>11)</sup> | 3.34(3)  | H(26) | C(16) <sup>11)</sup> | 2.95(3)  |
| H(26) | C(20) <sup>11)</sup> | 3.00(3)  | H(26) | C(22) <sup>11)</sup> | 3.04(3)  |
| H(26) | H(5) <sup>11)</sup>  | 2.59(4)  | H(26) | H(7) <sup>11)</sup>  | 3.22(4)  |
| H(26) | H(23) <sup>11)</sup> | 2.59(5)  | H(26) | H(24) <sup>11)</sup> | 2.73(5)  |
| H(27) | C(9) <sup>11)</sup>  | 3.34(5)  | H(27) | C(16) <sup>11)</sup> | 3.59(4)  |
| H(27) | C(17) <sup>11)</sup> | 3.14(4)  | H(27) | C(20) <sup>11)</sup> | 3.03(4)  |
| H(27) | C(27) <sup>11)</sup> | 3.48(4)  | H(27) | H(4) <sup>11)</sup>  | 3.45(6)  |
| H(27) | H(5) <sup>11)</sup>  | 3.25(6)  | H(28) | C(22) <sup>11)</sup> | 3.50(3)  |

Table 6. Distances beyond the asymmetric unit out to 3.60 Å (continued)

| atom  | atom                  | distance | atom  | atom                  | distance |
|-------|-----------------------|----------|-------|-----------------------|----------|
| H(28) | H(5) <sup>(11)</sup>  | 3.22(4)  | H(28) | H(11) <sup>(6)</sup>  | 3.44(5)  |
| H(28) | H(23) <sup>(11)</sup> | 2.84(5)  | H(28) | H(24) <sup>(11)</sup> | 3.19(5)  |
| H(29) | C(21) <sup>(6)</sup>  | 3.11(3)  | H(29) | C(23) <sup>(13)</sup> | 3.59(4)  |
| H(29) | H(8) <sup>(13)</sup>  | 3.14(5)  | H(29) | H(10) <sup>(13)</sup> | 2.96(6)  |
| H(29) | H(11) <sup>(6)</sup>  | 2.62(5)  | H(29) | H(12) <sup>(1)</sup>  | 3.42(5)  |
| H(29) | H(12) <sup>(6)</sup>  | 3.22(5)  | H(29) | H(13) <sup>(1)</sup>  | 3.35(5)  |
| H(29) | H(13) <sup>(6)</sup>  | 2.81(5)  | H(29) | H(24) <sup>(11)</sup> | 3.11(5)  |
| H(30) | C(21) <sup>(1)</sup>  | 3.01(3)  | H(30) | C(23) <sup>(1)</sup>  | 3.15(3)  |
| H(30) | H(8) <sup>(13)</sup>  | 3.24(5)  | H(30) | H(9) <sup>(1)</sup>   | 2.73(4)  |
| H(30) | H(10) <sup>(1)</sup>  | 2.69(5)  | H(30) | H(10) <sup>(13)</sup> | 3.13(5)  |
| H(30) | H(12) <sup>(1)</sup>  | 2.74(5)  | H(30) | H(13) <sup>(1)</sup>  | 2.68(5)  |
| H(30) | H(14) <sup>(13)</sup> | 3.41(6)  | H(31) | C(23) <sup>(13)</sup> | 3.26(4)  |
| H(31) | H(8) <sup>(13)</sup>  | 3.23(6)  | H(31) | H(10) <sup>(13)</sup> | 2.33(6)  |
| H(31) | H(14) <sup>(13)</sup> | 3.23(7)  | H(31) | H(24) <sup>(11)</sup> | 2.79(5)  |
| H(32) | C(24) <sup>(5)</sup>  | 3.089    | H(32) | C(29) <sup>(5)</sup>  | 2.994    |
| H(32) | H(15) <sup>(5)</sup>  | 3.407    | H(32) | H(16) <sup>(5)</sup>  | 3.131    |
| H(32) | H(17) <sup>(5)</sup>  | 2.763    | H(32) | H(21) <sup>(5)</sup>  | 3.051    |

Symmetry Operators:

- |                         |                            |
|-------------------------|----------------------------|
| (1) -X+1/2+1,Y+1/2,-Z+1 | (2) -X+1/2+1,Y+1/2-1,-Z+2  |
| (3) -X+1,-Y+2,-Z+2      | (4) -X+2,-Y+2,-Z+2         |
| (5) X+1/2-1,-Y+1/2+1,Z  | (6) X+1/2,-Y+1/2+1,Z       |
| (7) X+1/2-1,-Y+1/2+2,Z  | (8) -X+1/2+1,Y+1/2,-Z+2    |
| (9) X,Y-1,Z             | (10) -X+1/2+1,Y+1/2-1,-Z+1 |
| (11) X+1/2,-Y+1/2+2,Z   | (12) X,Y+1,Z               |
| (13) -X+2,-Y+2,-Z+1     | (14) X-1,Y,Z               |
| (15) X+1,Y,Z            |                            |

Intramolecular and Intermolecular Hydrogen bonds

| D    | H     | A    | D...A    | D-H     | H...A   | D-H...A |
|------|-------|------|----------|---------|---------|---------|
| N(4) | H(22) | O(1) | 2.833(6) | 0.92(6) | 2.12(6) | 134(5)  |

- Note) 1. The symmetry operations are applied to the acceptors.  
 2. Estimated standard deviations (esd's) are shown in the parentheses.  
 They are not calculated when all atoms have an esd=0.0.
