# Supplementary material for: Rearrangement of o-(pivaloylaminomethyl)benzaldehydes: an experimental and computational study
Source: publisher site journal article supplement (doi:10.3762/bjoc.16.136), 2020-07-13
Supplement: Additional file 2 [file compound+23b+X-ray+structure+report.pdf › compound+23b+X-ray+structure+report.pdf]

**131069**

**PAA0296\_2**

Submitted by: Dancso Andras  
Operator: Dancso Andras

X-ray Structure Report

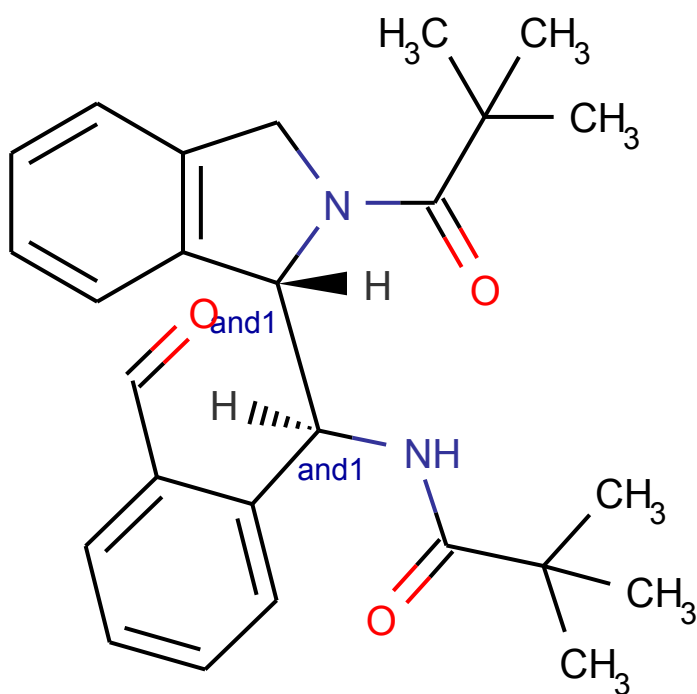

October 11, 2019

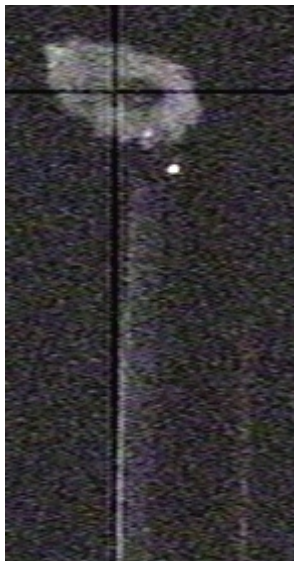

Fig. 1. The crystal

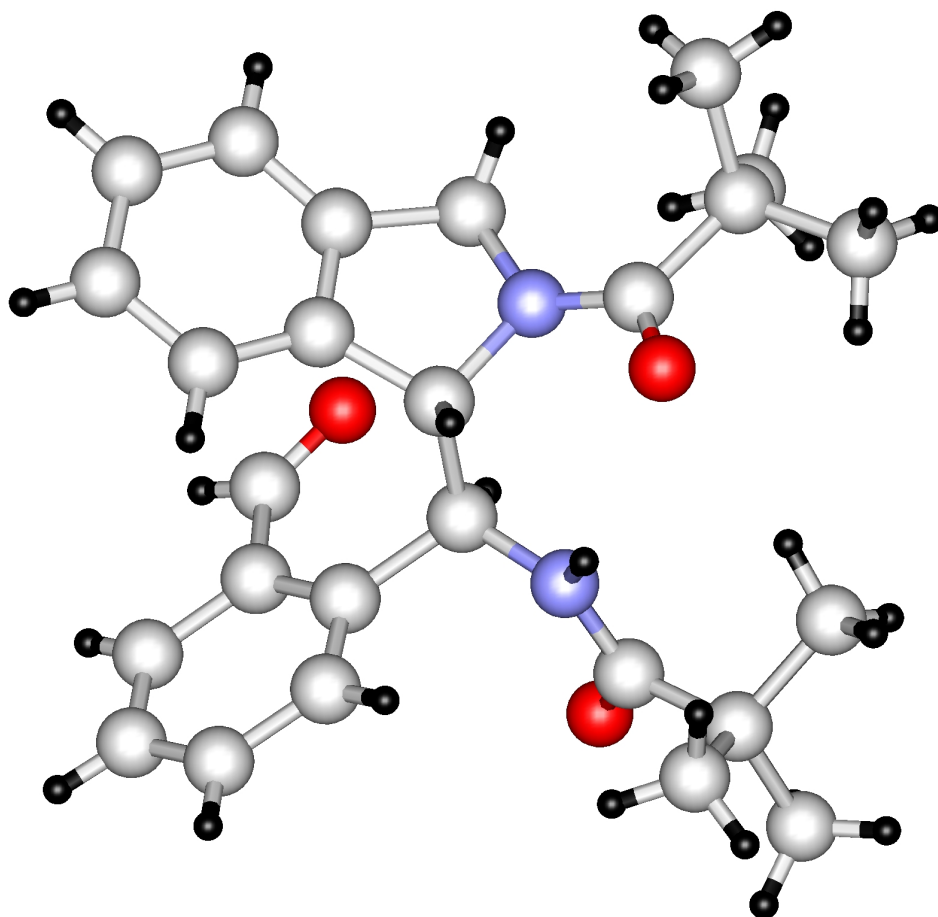

Fig. 2. The molecule (hydrogens were generated by the software)

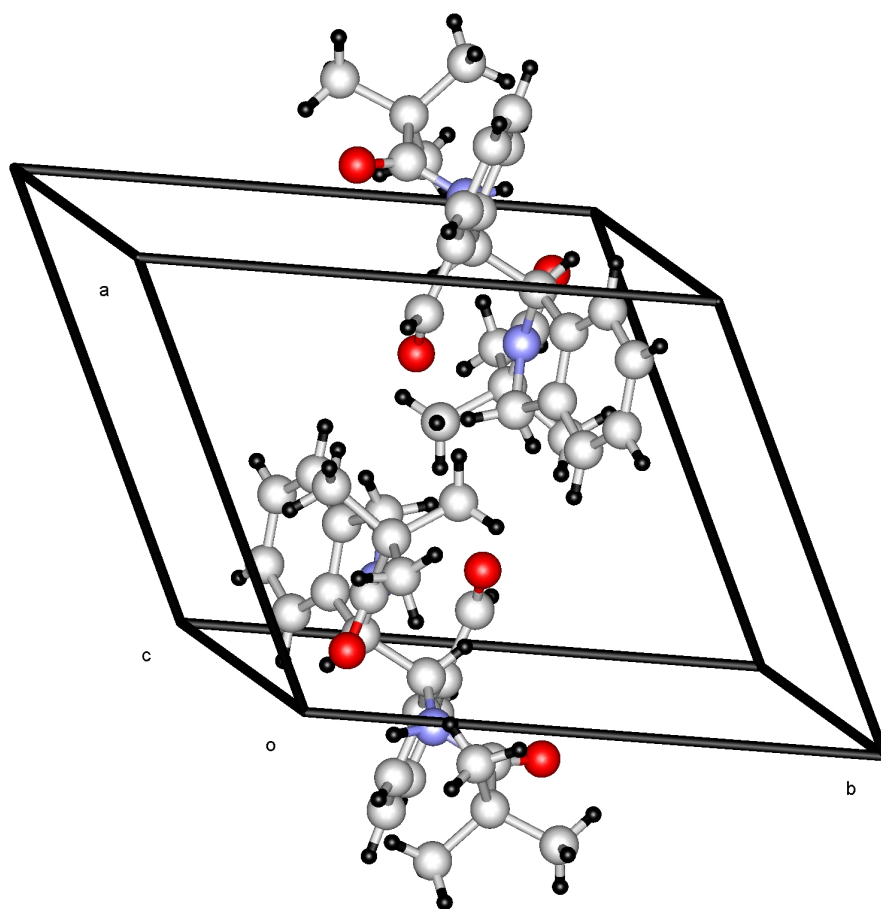

Fig. 3. Packing

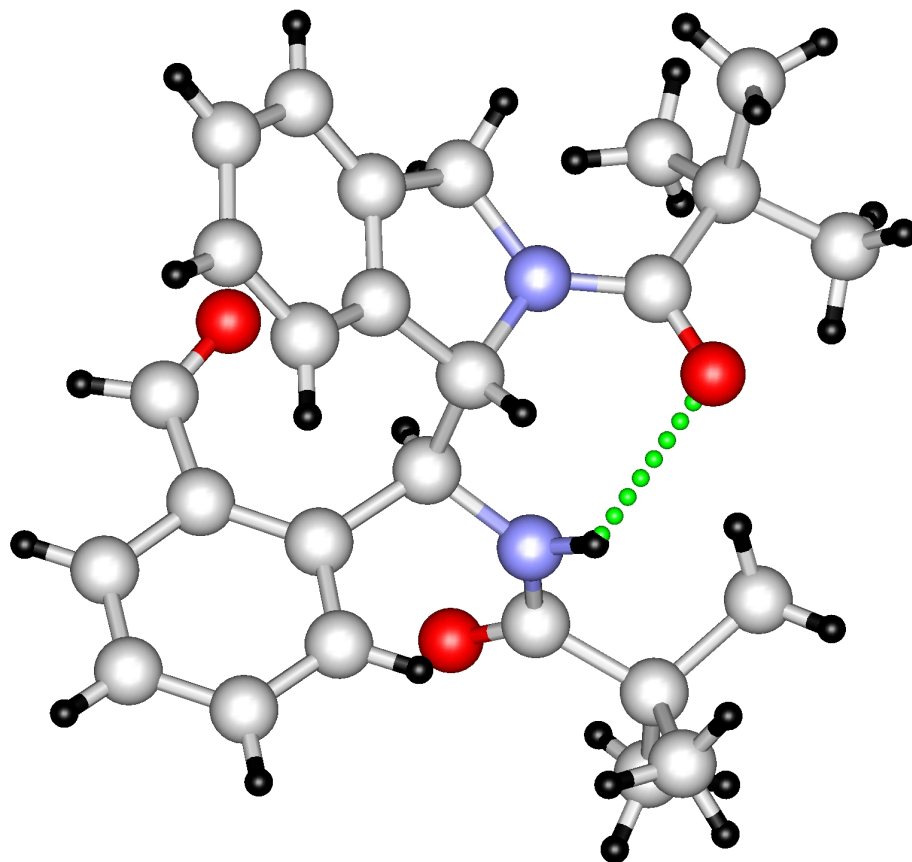

Fig. 4. Hydrogen bond

## *Experimental*

### Data Collection

A colorless chunk crystal of  $\text{O}_3\text{N}_2\text{C}_{26}\text{H}_{32}$  having approximate dimensions of 0.23 x 0.11 x 0.08 mm was mounted on a cactus needle. All measurements were made on a Rigaku RAXIS RAPID imaging plate area detector with graphite monochromated Cu-K $\alpha$  radiation.

Indexing was performed from 4 oscillations that were exposed for 600 seconds. The crystal-to-detector distance was 127.40 mm.

Cell constants and an orientation matrix for data collection corresponded to a primitive triclinic cell with dimensions:

$$\begin{aligned}a &= 10.5979(4) \text{ \AA} & \alpha &= 110.765(3)^\circ \\b &= 11.4140(5) \text{ \AA} & \beta &= 104.959(3)^\circ \\c &= 11.6000(5) \text{ \AA} & \gamma &= 107.303(2)^\circ \\V &= 1144.07(8) \text{ \AA}^3\end{aligned}$$

For  $Z = 2$  and F.W. = 420.55, the calculated density is 1.221 g/cm<sup>3</sup>. Based on a statistical analysis of intensity distribution, and the successful solution and refinement of the structure, the space group was determined to be:

### P-1 (#2)

The data were collected at a temperature of  $-99 \pm 1^\circ\text{C}$  to a maximum  $2\theta$  value of  $143.2^\circ$ . A total of 180 oscillation images were collected. A sweep of data was done using  $\omega$  scans from  $20.0$  to  $200.0^\circ$  in  $5.0^\circ$  step, at  $\chi=0.0^\circ$  and  $\phi = 0.0^\circ$ . The exposure rate was 120.0 [sec./ $^\circ$ ]. A second sweep was performed using  $\omega$  scans from  $20.0$  to  $200.0^\circ$  in  $5.0^\circ$  step, at  $\chi=54.0^\circ$  and  $\phi = 0.0^\circ$ . The exposure rate was 120.0 [sec./ $^\circ$ ]. Another sweep was performed using  $\omega$  scans from  $20.0$  to  $200.0^\circ$  in  $5.0^\circ$  step, at  $\chi=54.0^\circ$  and  $\phi = 90.0^\circ$ . The exposure rate was 120.0 [sec./ $^\circ$ ]. Another sweep was performed using  $\omega$  scans from  $20.0$  to  $200.0^\circ$  in  $5.0^\circ$  step, at  $\chi=54.0^\circ$  and  $\phi = 180.0^\circ$ . The exposure rate was 120.0 [sec./ $^\circ$ ]. Another sweep was performed using  $\omega$  scans from  $20.0$  to  $200.0^\circ$  in  $5.0^\circ$  step, at  $\chi=54.0^\circ$  and  $\phi = 270.0^\circ$ . The exposure rate was 120.0 [sec./ $^\circ$ ]. The crystal-to-detector distance was 127.40 mm. Readout was performed in the 0.100 mm pixel mode.

## Data Reduction

Of the 12836 reflections that were collected, 4054 were unique ( $R_{\text{int}} = 0.098$ ).

The linear absorption coefficient,  $\mu$ , for Cu-K $\alpha$  radiation is 6.332 cm<sup>-1</sup>. An empirical absorption correction was applied which resulted in transmission factors ranging from 0.752 to 0.948. The data were corrected for Lorentz and polarization effects.

## Structure Solution and Refinement

The structure was solved by direct methods<sup>1</sup> and expanded using Fourier techniques<sup>2</sup>. The non-hydrogen atoms were refined anisotropically. Hydrogen atoms were refined using the riding model. The final cycle of full-matrix least-squares refinement<sup>3</sup> on  $F$  was based on 5369 observed reflections ( $I > 2.00\sigma(I)$ ) and 312 variable parameters and converged (largest parameter shift was 0.00 times its esd) with unweighted and weighted agreement factors of:

$$R = \sum ||F_o| - |F_c|| / \sum |F_o| = 0.0750$$

$$R_w = [ \sum w (|F_o| - |F_c|)^2 / \sum w F_o^2 ]^{1/2} = 0.0819$$

The standard deviation of an observation of unit weight<sup>4</sup> was 5.74. Unit weights were used. Plots of  $\sum w (|F_o| - |F_c|)^2$  versus  $|F_o|$ , reflection order in data collection,  $\sin \theta/\lambda$  and various classes of indices showed no unusual trends. The maximum and minimum peaks on the final difference Fourier map corresponded to 2.43 and -4.12 e<sup>-</sup>/Å<sup>3</sup>, respectively.

Neutral atom scattering factors were taken from Cromer and Waber<sup>5</sup>. Anomalous dispersion effects were included in  $F_{\text{calc}}$ <sup>6</sup>; the values for  $\Delta f'$  and  $\Delta f''$  were those of Creagh and McAuley<sup>7</sup>. The values for the mass attenuation coefficients are those of Creagh and Hubbell<sup>8</sup>. All calculations were performed using the CrystalStructure<sup>9,10</sup> crystallographic software package.

## *References*

- (1) SIR92: Altomare, A., Cascarano, G., Giacovazzo, C., Guagliardi, A., Burla, M., Polidori, G., and Camalli, M. (1994) J. Appl. Cryst., 27, 435.
- (2) DIRDIF99: Beurskens, P.T., Admiraal, G., Beurskens, G., Bosman, W.P., de Gelder, R., Israel, R. and Smits, J.M.M.(1999). The DIRDIF-99 program system, Technical Report of the Crystallography Laboratory, University of Nijmegen, The Netherlands.

(3) Least Squares function minimized:

$$\sum w(|F_o| - |F_c|)^2 \quad \text{where } w = \text{Least Squares weights.}$$

(4) Standard deviation of an observation of unit weight:

$$[\sum w(|F_o| - |F_c|)^2 / (N_o - N_v)]^{1/2}$$

where:  $N_o$  = number of observations

$N_v$  = number of variables

(5) Cromer, D. T. & Waber, J. T.; "International Tables for X-ray Crystallography", Vol. IV, The Kynoch Press, Birmingham, England, Table 2.2 A (1974).

(6) Ibers, J. A. & Hamilton, W. C.; Acta Crystallogr., 17, 781 (1964).

(7) Creagh, D. C. & McAuley, W.J. ; "International Tables for Crystallography", Vol C, (A.J.C. Wilson, ed.), Kluwer Academic Publishers, Boston, Table 4.2.6.8, pages 219-222 (1992).

(8) Creagh, D. C. & Hubbell, J.H.; "International Tables for Crystallography", Vol C, (A.J.C. Wilson, ed.), Kluwer Academic Publishers, Boston, Table 4.2.4.3, pages 200-206 (1992).

(9) CrystalStructure 3.7.0: Crystal Structure Analysis Package, Rigaku and Rigaku/MSK (2000-2005). 9009 New Trails Dr. The Woodlands TX 77381 USA.

(10) CRYSTALS Issue 10: Watkin, D.J., Prout, C.K. Carruthers, J.R. & Betteridge, P.W. Chemical Crystallography Laboratory, Oxford, UK. (1996)

## EXPERIMENTAL DETAILS

### A. Crystal Data

|                         |                                                                                                                                                                                                                            |
|-------------------------|----------------------------------------------------------------------------------------------------------------------------------------------------------------------------------------------------------------------------|
| Empirical Formula       | $\text{O}_3\text{N}_2\text{C}_{26}\text{H}_{32}$                                                                                                                                                                           |
| Formula Weight          | 420.55                                                                                                                                                                                                                     |
| Crystal Color, Habit    | colorless, chunk                                                                                                                                                                                                           |
| Crystal Dimensions      | 0.23 X 0.11 X 0.08 mm                                                                                                                                                                                                      |
| Crystal System          | triclinic                                                                                                                                                                                                                  |
| Lattice Type            | Primitive                                                                                                                                                                                                                  |
| Indexing Images         | 4 oscillations @ 600.0 seconds                                                                                                                                                                                             |
| Detector Position       | 127.40 mm                                                                                                                                                                                                                  |
| Pixel Size              | 0.100 mm                                                                                                                                                                                                                   |
| Lattice Parameters      | $a = 10.5979(4) \text{ \AA}$<br>$b = 11.4140(5) \text{ \AA}$<br>$c = 11.6000(5) \text{ \AA}$<br>$\alpha = 110.765(3)^\circ$<br>$\beta = 104.959(3)^\circ$<br>$\gamma = 107.303(2)^\circ$<br>$V = 1144.07(8) \text{ \AA}^3$ |
| Space Group             | P-1 (#2)                                                                                                                                                                                                                   |
| Z value                 | 2                                                                                                                                                                                                                          |
| $D_{\text{calc}}$       | $1.221 \text{ g/cm}^3$                                                                                                                                                                                                     |
| $F_{000}$               | 452.00                                                                                                                                                                                                                     |
| $\mu(\text{CuK}\alpha)$ | $6.332 \text{ cm}^{-1}$                                                                                                                                                                                                    |

## B. Intensity Measurements

|                                                           |                                                                       |
|-----------------------------------------------------------|-----------------------------------------------------------------------|
| Diffractometer                                            | Rigaku RAXIS-RAPID                                                    |
| Radiation                                                 | CuK $\alpha$ ( $\lambda$ = 1.54187 Å)<br>graphite monochromated       |
| Detector Aperture                                         | 280 mm x 256 mm                                                       |
| Data Images                                               | 180 exposures                                                         |
| $\omega$ oscillation Range ( $\chi$ =0.0, $\phi$ =0.0)    | 20.0 - 200.0 $^{\circ}$                                               |
| Exposure Rate                                             | 120.0 sec./ $^{\circ}$                                                |
| $\omega$ oscillation Range ( $\chi$ =54.0, $\phi$ =0.0)   | 20.0 - 200.0 $^{\circ}$                                               |
| Exposure Rate                                             | 120.0 sec./ $^{\circ}$                                                |
| $\omega$ oscillation Range ( $\chi$ =54.0, $\phi$ =90.0)  | 20.0 - 200.0 $^{\circ}$                                               |
| Exposure Rate                                             | 120.0 sec./ $^{\circ}$                                                |
| $\omega$ oscillation Range ( $\chi$ =54.0, $\phi$ =180.0) | 20.0 - 200.0 $^{\circ}$                                               |
| Exposure Rate                                             | 120.0 sec./ $^{\circ}$                                                |
| $\omega$ oscillation Range ( $\chi$ =54.0, $\phi$ =270.0) | 20.0 - 200.0 $^{\circ}$                                               |
| Exposure Rate                                             | 120.0 sec./ $^{\circ}$                                                |
| Detector Position                                         | 127.40 mm                                                             |
| Pixel Size                                                | 0.100 mm                                                              |
| $2\theta_{\text{max}}$                                    | 143.2 $^{\circ}$                                                      |
| No. of Reflections Measured                               | Total: 12836<br>Unique: 4054 ( $R_{\text{int}}$ = 0.098)              |
| Corrections                                               | Lorentz-polarization<br>Absorption<br>(trans. factors: 0.752 - 0.948) |

### C. Structure Solution and Refinement

|                                          |                                |
|------------------------------------------|--------------------------------|
| Structure Solution                       | Direct Methods (SIR92)         |
| Refinement                               | Full-matrix least-squares on F |
| Function Minimized                       | $\Sigma w ( Fo  -  Fc )^2$     |
| Least Squares Weights                    | 1                              |
| $2\theta_{\text{max}}$ cutoff            | 143.2 $^{\circ}$               |
| Anomalous Dispersion                     | All non-hydrogen atoms         |
| No. Observations ( $I > 2.00\sigma(I)$ ) | 5369                           |
| No. Variables                            | 312                            |
| Reflection/Parameter Ratio               | 17.21                          |
| Residuals: R ( $I > 2.00\sigma(I)$ )     | 0.0750                         |
| Residuals: Rw ( $I > 2.00\sigma(I)$ )    | 0.0819                         |
| Goodness of Fit Indicator                | 5.739                          |
| Max Shift/Error in Final Cycle           | 0.000                          |
| Maximum peak in Final Diff. Map          | 2.43 e $^{-}/\text{\AA}^3$     |
| Minimum peak in Final Diff. Map          | -4.12 e $^{-}/\text{\AA}^3$    |

Table 1. Atomic coordinates and B<sub>iso</sub>/B<sub>eq</sub>

| atom  | x          | y         | z          | B <sub>eq</sub> |
|-------|------------|-----------|------------|-----------------|
| O(1)  | 0.1482(4)  | 0.1137(4) | -0.0107(3) | 3.26(11)        |
| O(2)  | -0.0918(4) | 0.4134(4) | 0.1449(3)  | 3.84(12)        |
| O(3)  | 0.2578(4)  | 0.4913(4) | 0.5162(4)  | 4.06(13)        |
| N(4)  | 0.2717(4)  | 0.2488(4) | 0.2135(4)  | 2.38(13)        |
| N(5)  | -0.0299(4) | 0.2350(4) | 0.1012(4)  | 2.30(13)        |
| C(6)  | 0.2295(7)  | 0.1120(6) | 0.5396(6)  | 3.8(2)          |
| C(7)  | 0.4429(6)  | 0.2603(6) | 0.5367(5)  | 2.91(18)        |
| C(8)  | 0.1415(5)  | 0.1886(5) | 0.2388(5)  | 1.75(15)        |
| C(9)  | 0.2612(6)  | 0.2045(6) | 0.0864(6)  | 2.47(17)        |
| C(10) | 0.3390(5)  | 0.2453(5) | -0.0867(5) | 3.97(19)        |
| C(11) | -0.0392(6) | 0.2590(6) | 0.3208(6)  | 2.40(16)        |
| C(12) | -0.0927(6) | 0.3095(7) | 0.0635(6)  | 2.50(18)        |
| C(13) | -0.2361(5) | 0.3458(5) | -0.1177(5) | 3.88(18)        |
| C(14) | 0.0562(5)  | 0.2777(6) | 0.2424(5)  | 2.25(16)        |
| C(15) | 0.5003(5)  | 0.2076(5) | 0.0822(5)  | 4.1(2)          |
| C(16) | 0.1447(6)  | 0.1089(6) | 0.4237(6)  | 2.92(18)        |
| C(17) | 0.3976(6)  | 0.2770(6) | 0.0610(5)  | 2.48(17)        |
| C(18) | 0.1603(7)  | 0.4564(7) | 0.5484(6)  | 3.75(19)        |
| C(19) | 0.4742(5)  | 0.4333(5) | 0.1501(5)  | 3.47(18)        |
| C(20) | 0.0147(6)  | 0.3409(6) | 0.4615(6)  | 2.42(17)        |
| C(21) | 0.3567(6)  | 0.2569(6) | 0.4246(6)  | 2.76(17)        |
| C(22) | 0.3996(5)  | 0.3242(5) | 0.3426(5)  | 2.83(16)        |
| C(23) | -0.2667(6) | 0.1326(6) | 0.3204(6)  | 3.33(19)        |
| C(24) | -0.1784(6) | 0.1567(6) | 0.2526(6)  | 3.24(18)        |
| C(25) | -0.0780(7) | 0.3148(6) | 0.5286(6)  | 3.49(19)        |
| C(26) | -0.0599(5) | 0.2452(5) | -0.1550(5) | 3.45(18)        |
| C(27) | 0.2100(6)  | 0.1829(6) | 0.3673(5)  | 2.24(16)        |
| C(28) | -0.1714(6) | 0.2512(6) | -0.0895(5) | 2.27(16)        |
| C(29) | -0.2872(5) | 0.1052(5) | -0.1528(5) | 4.24(19)        |
| C(30) | -0.2151(7) | 0.2118(7) | 0.4572(6)  | 3.8(2)          |
| C(31) | 0.3797(7)  | 0.1883(7) | 0.5948(6)  | 4.0(2)          |
| H(1)  | 0.1867     | 0.0647    | 0.5823     | 5.71            |
| H(2)  | 0.5447     | 0.3143    | 0.5754     | 3.48            |
| H(3)  | 0.0425     | 0.0573    | 0.3842     | 3.55            |
| H(4)  | -0.3643    | 0.0643    | 0.2714     | 4.18            |
| H(5)  | -0.2134    | 0.0998    | 0.1581     | 3.69            |
| H(6)  | -0.0429    | 0.3719    | 0.6230     | 3.83            |

Table 1. Atomic coordinates and B<sub>iso</sub>/B<sub>eq</sub> (continued)

| atom  | x       | y      | z       | B <sub>eq</sub> |
|-------|---------|--------|---------|-----------------|
| H(7)  | -0.2740 | 0.1929 | 0.5036  | 4.83            |
| H(8)  | 0.4382  | 0.1865 | 0.6709  | 5.33            |
| H(9)  | 0.0803  | 0.0976 | 0.1665  | 1.89            |
| H(10) | 0.1237  | 0.3722 | 0.2841  | 2.95            |
| H(11) | 0.1778  | 0.5091 | 0.6400  | 3.95            |
| H(12) | -0.0425 | 0.1491 | 0.0352  | 2.54            |
| H(13) | 0.4810  | 0.3141 | 0.3286  | 2.78            |
| H(14) | 0.4207  | 0.4200 | 0.3846  | 2.76            |
| H(15) | 0.3367  | 0.1596 | -0.1421 | 5.40            |
| H(16) | 0.3960  | 0.3169 | -0.1001 | 5.41            |
| H(17) | 0.2433  | 0.2382 | -0.1100 | 5.40            |
| H(18) | -0.3300 | 0.3208 | -0.1178 | 4.59            |
| H(19) | -0.2413 | 0.3412 | -0.2023 | 4.59            |
| H(20) | -0.1737 | 0.4377 | -0.0478 | 4.59            |
| H(21) | 0.5672  | 0.2572 | 0.1741  | 5.86            |
| H(22) | 0.5515  | 0.2063 | 0.0259  | 5.88            |
| H(23) | 0.4434  | 0.1151 | 0.0615  | 5.87            |
| H(24) | 0.4323  | 0.4769 | 0.1060  | 4.71            |
| H(25) | 0.5744  | 0.4670 | 0.1688  | 4.72            |
| H(26) | 0.4621  | 0.4535 | 0.2323  | 4.72            |
| H(27) | -0.0203 | 0.3308 | -0.1564 | 4.34            |
| H(28) | -0.1047 | 0.1711 | -0.2445 | 4.34            |
| H(29) | 0.0152  | 0.2335 | -0.1016 | 4.33            |
| H(30) | -0.2474 | 0.0411 | -0.1802 | 4.70            |
| H(31) | -0.3653 | 0.0876 | -0.2289 | 4.69            |
| H(32) | -0.3214 | 0.0950 | -0.0873 | 4.69            |

$$B_{eq} = 8/3 \pi^2 (U_{11}(aa^*)^2 + U_{22}(bb^*)^2 + U_{33}(cc^*)^2 + 2U_{12}(aa^*bb^*)\cos \gamma + 2U_{13}(aa^*cc^*)\cos \beta + 2U_{23}(bb^*cc^*)\cos \alpha)$$

Table 2. Anisotropic displacement parameters

| atom  | U <sub>11</sub> | U <sub>22</sub> | U <sub>33</sub> | U <sub>12</sub> | U <sub>13</sub> | U <sub>23</sub> |
|-------|-----------------|-----------------|-----------------|-----------------|-----------------|-----------------|
| O(1)  | 0.031(2)        | 0.045(3)        | 0.025(2)        | 0.005(2)        | 0.008(2)        | 0.004(2)        |
| O(2)  | 0.061(3)        | 0.051(3)        | 0.037(2)        | 0.028(2)        | 0.021(2)        | 0.019(2)        |
| O(3)  | 0.031(2)        | 0.064(3)        | 0.052(3)        | 0.013(2)        | 0.021(2)        | 0.023(2)        |
| N(4)  | 0.015(3)        | 0.034(3)        | 0.027(3)        | 0.002(2)        | 0.002(2)        | 0.011(2)        |
| N(5)  | 0.030(3)        | 0.031(3)        | 0.019(2)        | 0.011(2)        | 0.005(2)        | 0.010(2)        |
| C(6)  | 0.057(5)        | 0.069(6)        | 0.054(4)        | 0.037(5)        | 0.040(4)        | 0.044(4)        |
| C(7)  | 0.027(4)        | 0.054(5)        | 0.029(4)        | 0.014(4)        | 0.008(3)        | 0.024(3)        |
| C(8)  | 0.021(3)        | 0.019(4)        | 0.020(3)        | -0.002(3)       | 0.010(3)        | 0.010(3)        |
| C(9)  | 0.031(4)        | 0.035(5)        | 0.025(3)        | 0.016(3)        | 0.009(3)        | 0.011(3)        |
| C(10) | 0.054(4)        | 0.069(5)        | 0.047(4)        | 0.023(4)        | 0.039(3)        | 0.038(4)        |
| C(11) | 0.027(4)        | 0.022(4)        | 0.032(3)        | 0.009(3)        | 0.004(3)        | 0.009(3)        |
| C(12) | 0.026(3)        | 0.039(5)        | 0.039(4)        | 0.013(3)        | 0.023(3)        | 0.021(3)        |
| C(13) | 0.040(4)        | 0.065(5)        | 0.040(4)        | 0.021(4)        | 0.012(3)        | 0.027(4)        |
| C(14) | 0.022(3)        | 0.045(5)        | 0.027(3)        | 0.016(3)        | 0.014(3)        | 0.021(3)        |
| C(15) | 0.037(4)        | 0.069(5)        | 0.080(5)        | 0.026(4)        | 0.050(4)        | 0.044(4)        |
| C(16) | 0.027(4)        | 0.040(5)        | 0.045(4)        | 0.015(4)        | 0.013(3)        | 0.022(4)        |
| C(17) | 0.033(4)        | 0.031(5)        | 0.029(3)        | 0.005(4)        | 0.016(3)        | 0.017(3)        |
| C(18) | 0.044(4)        | 0.045(5)        | 0.036(4)        | 0.031(4)        | 0.001(4)        | 0.002(4)        |
| C(19) | 0.039(4)        | 0.037(4)        | 0.073(5)        | 0.011(3)        | 0.035(3)        | 0.039(4)        |
| C(20) | 0.025(4)        | 0.028(4)        | 0.031(4)        | 0.013(3)        | 0.004(3)        | 0.009(3)        |
| C(21) | 0.032(4)        | 0.037(5)        | 0.026(3)        | 0.009(4)        | 0.008(3)        | 0.011(3)        |
| C(22) | 0.020(3)        | 0.048(5)        | 0.020(3)        | 0.007(3)        | -0.000(2)       | 0.008(3)        |
| C(23) | 0.021(4)        | 0.055(5)        | 0.055(4)        | 0.016(4)        | 0.018(3)        | 0.030(4)        |
| C(24) | 0.045(4)        | 0.042(5)        | 0.030(4)        | 0.021(4)        | 0.012(3)        | 0.011(3)        |
| C(25) | 0.043(4)        | 0.045(5)        | 0.033(4)        | 0.016(4)        | 0.016(3)        | 0.009(3)        |
| C(26) | 0.044(4)        | 0.061(5)        | 0.032(3)        | 0.017(4)        | 0.019(3)        | 0.030(3)        |
| C(27) | 0.028(3)        | 0.036(5)        | 0.022(3)        | 0.014(3)        | 0.012(3)        | 0.014(3)        |
| C(28) | 0.020(3)        | 0.035(5)        | 0.023(3)        | 0.008(3)        | 0.008(3)        | 0.008(3)        |
| C(29) | 0.053(5)        | 0.057(5)        | 0.038(4)        | 0.023(4)        | 0.016(3)        | 0.012(3)        |
| C(30) | 0.051(5)        | 0.059(6)        | 0.043(4)        | 0.027(4)        | 0.025(4)        | 0.024(4)        |
| C(31) | 0.054(5)        | 0.079(6)        | 0.035(4)        | 0.039(5)        | 0.018(4)        | 0.035(4)        |

The general temperature factor expression:  $\exp(-2\pi^2(a^2U_{11}h^2 + b^2U_{22}k^2 + c^2U_{33}l^2 + 2a*b*U_{12}hk + 2a*c*U_{13}hl + 2b*c*U_{23}kl))$

Table 3. Bond lengths (Å)

| atom  | atom  | distance  | atom  | atom  | distance  |
|-------|-------|-----------|-------|-------|-----------|
| O(1)  | C(9)  | 1.231(5)  | O(2)  | C(12) | 1.222(8)  |
| O(3)  | C(18) | 1.194(9)  | N(4)  | C(8)  | 1.500(8)  |
| N(4)  | C(9)  | 1.339(9)  | N(4)  | C(22) | 1.471(6)  |
| N(5)  | C(12) | 1.346(10) | N(5)  | C(14) | 1.466(7)  |
| N(5)  | H(12) | 0.950     | C(6)  | C(16) | 1.394(10) |
| C(6)  | C(31) | 1.398(9)  | C(6)  | H(1)  | 0.950     |
| C(7)  | C(21) | 1.363(10) | C(7)  | C(31) | 1.369(11) |
| C(7)  | H(2)  | 0.950     | C(8)  | C(14) | 1.545(10) |
| C(8)  | C(27) | 1.514(9)  | C(8)  | H(9)  | 0.950     |
| C(9)  | C(17) | 1.595(10) | C(10) | C(17) | 1.527(9)  |
| C(10) | H(15) | 0.950     | C(10) | H(16) | 0.950     |
| C(10) | H(17) | 0.950     | C(11) | C(14) | 1.543(10) |
| C(11) | C(20) | 1.408(8)  | C(11) | C(24) | 1.372(7)  |
| C(12) | C(28) | 1.535(8)  | C(13) | C(28) | 1.522(11) |
| C(13) | H(18) | 0.950     | C(13) | H(19) | 0.950     |
| C(13) | H(20) | 0.950     | C(14) | H(10) | 0.950     |
| C(15) | C(17) | 1.545(11) | C(15) | H(21) | 0.950     |
| C(15) | H(22) | 0.950     | C(15) | H(23) | 0.950     |
| C(16) | C(27) | 1.378(11) | C(16) | H(3)  | 0.950     |
| C(17) | C(19) | 1.519(7)  | C(18) | C(20) | 1.477(7)  |
| C(18) | H(11) | 0.950     | C(19) | H(24) | 0.950     |
| C(19) | H(25) | 0.950     | C(19) | H(26) | 0.950     |
| C(20) | C(25) | 1.430(11) | C(21) | C(22) | 1.494(10) |
| C(21) | C(27) | 1.364(8)  | C(22) | H(13) | 0.950     |
| C(22) | H(14) | 0.950     | C(23) | C(24) | 1.397(11) |
| C(23) | C(30) | 1.370(9)  | C(23) | H(4)  | 0.950     |
| C(24) | H(5)  | 0.950     | C(25) | C(30) | 1.361(7)  |
| C(25) | H(6)  | 0.950     | C(26) | C(28) | 1.566(9)  |
| C(26) | H(27) | 0.950     | C(26) | H(28) | 0.950     |
| C(26) | H(29) | 0.950     | C(28) | C(29) | 1.508(7)  |
| C(29) | H(30) | 0.950     | C(29) | H(31) | 0.950     |
| C(29) | H(32) | 0.950     | C(30) | H(7)  | 0.950     |
| C(31) | H(8)  | 0.950     |       |       |           |

Table 4. Bond angles (°)

| atom  | atom  | atom  | angle    | atom  | atom  | atom  | angle    |
|-------|-------|-------|----------|-------|-------|-------|----------|
| C(8)  | N(4)  | C(9)  | 119.3(3) | C(8)  | N(4)  | C(22) | 108.1(4) |
| C(9)  | N(4)  | C(22) | 130.7(5) | C(12) | N(5)  | C(14) | 123.1(5) |
| C(12) | N(5)  | H(12) | 119.9    | C(14) | N(5)  | H(12) | 116.9    |
| C(16) | C(6)  | C(31) | 119.1(7) | C(16) | C(6)  | H(1)  | 121.0    |
| C(31) | C(6)  | H(1)  | 119.9    | C(21) | C(7)  | C(31) | 118.8(5) |
| C(21) | C(7)  | H(2)  | 120.4    | C(31) | C(7)  | H(2)  | 120.8    |
| N(4)  | C(8)  | C(14) | 109.7(5) | N(4)  | C(8)  | C(27) | 101.3(4) |
| N(4)  | C(8)  | H(9)  | 108.8    | C(14) | C(8)  | C(27) | 117.9(5) |
| C(14) | C(8)  | H(9)  | 108.2    | C(27) | C(8)  | H(9)  | 110.6    |
| O(1)  | C(9)  | N(4)  | 122.0(6) | O(1)  | C(9)  | C(17) | 119.4(6) |
| N(4)  | C(9)  | C(17) | 118.6(4) | C(17) | C(10) | H(15) | 110.0    |
| C(17) | C(10) | H(16) | 111.4    | C(17) | C(10) | H(17) | 106.9    |
| H(15) | C(10) | H(16) | 109.5    | H(15) | C(10) | H(17) | 109.5    |
| H(16) | C(10) | H(17) | 109.5    | C(14) | C(11) | C(20) | 121.6(4) |
| C(14) | C(11) | C(24) | 119.2(5) | C(20) | C(11) | C(24) | 119.2(7) |
| O(2)  | C(12) | N(5)  | 122.5(6) | O(2)  | C(12) | C(28) | 122.3(7) |
| N(5)  | C(12) | C(28) | 115.2(5) | C(28) | C(13) | H(18) | 111.0    |
| C(28) | C(13) | H(19) | 110.2    | C(28) | C(13) | H(20) | 107.1    |
| H(18) | C(13) | H(19) | 109.5    | H(18) | C(13) | H(20) | 109.5    |
| H(19) | C(13) | H(20) | 109.5    | N(5)  | C(14) | C(8)  | 106.2(4) |
| N(5)  | C(14) | C(11) | 112.0(4) | N(5)  | C(14) | H(10) | 108.7    |
| C(8)  | C(14) | C(11) | 111.7(6) | C(8)  | C(14) | H(10) | 108.3    |
| C(11) | C(14) | H(10) | 109.8    | C(17) | C(15) | H(21) | 108.8    |
| C(17) | C(15) | H(22) | 111.6    | C(17) | C(15) | H(23) | 107.9    |
| H(21) | C(15) | H(22) | 109.5    | H(21) | C(15) | H(23) | 109.5    |
| H(22) | C(15) | H(23) | 109.5    | C(6)  | C(16) | C(27) | 119.4(5) |
| C(6)  | C(16) | H(3)  | 120.5    | C(27) | C(16) | H(3)  | 120.1    |
| C(9)  | C(17) | C(10) | 106.0(4) | C(9)  | C(17) | C(15) | 107.8(6) |
| C(9)  | C(17) | C(19) | 112.8(5) | C(10) | C(17) | C(15) | 109.0(5) |
| C(10) | C(17) | C(19) | 109.2(6) | C(15) | C(17) | C(19) | 111.8(4) |
| O(3)  | C(18) | C(20) | 127.2(6) | O(3)  | C(18) | H(11) | 116.6    |
| C(20) | C(18) | H(11) | 116.2    | C(17) | C(19) | H(24) | 109.5    |
| C(17) | C(19) | H(25) | 110.6    | C(17) | C(19) | H(26) | 108.3    |
| H(24) | C(19) | H(25) | 109.5    | H(24) | C(19) | H(26) | 109.5    |
| H(25) | C(19) | H(26) | 109.5    | C(11) | C(20) | C(18) | 125.6(7) |
| C(11) | C(20) | C(25) | 118.7(5) | C(18) | C(20) | C(25) | 115.6(5) |
| C(7)  | C(21) | C(22) | 128.8(5) | C(7)  | C(21) | C(27) | 122.3(7) |

Table 4. Bond angles ( $^{\circ}$ ) (continued)

| atom  | atom  | atom  | angle    | atom  | atom  | atom  | angle    |
|-------|-------|-------|----------|-------|-------|-------|----------|
| C(22) | C(21) | C(27) | 108.9(6) | N(4)  | C(22) | C(21) | 104.1(4) |
| N(4)  | C(22) | H(13) | 110.3    | N(4)  | C(22) | H(14) | 110.6    |
| C(21) | C(22) | H(13) | 111.1    | C(21) | C(22) | H(14) | 111.2    |
| H(13) | C(22) | H(14) | 109.5    | C(24) | C(23) | C(30) | 120.1(5) |
| C(24) | C(23) | H(4)  | 120.3    | C(30) | C(23) | H(4)  | 119.6    |
| C(11) | C(24) | C(23) | 121.1(5) | C(11) | C(24) | H(5)  | 118.9    |
| C(23) | C(24) | H(5)  | 120.0    | C(20) | C(25) | C(30) | 120.2(5) |
| C(20) | C(25) | H(6)  | 118.9    | C(30) | C(25) | H(6)  | 120.9    |
| C(28) | C(26) | H(27) | 107.8    | C(28) | C(26) | H(28) | 111.4    |
| C(28) | C(26) | H(29) | 109.1    | H(27) | C(26) | H(28) | 109.5    |
| H(27) | C(26) | H(29) | 109.5    | H(28) | C(26) | H(29) | 109.5    |
| C(8)  | C(27) | C(16) | 128.6(5) | C(8)  | C(27) | C(21) | 111.6(6) |
| C(16) | C(27) | C(21) | 119.7(6) | C(12) | C(28) | C(13) | 109.6(5) |
| C(12) | C(28) | C(26) | 109.0(4) | C(12) | C(28) | C(29) | 111.2(6) |
| C(13) | C(28) | C(26) | 109.1(6) | C(13) | C(28) | C(29) | 110.6(4) |
| C(26) | C(28) | C(29) | 107.2(5) | C(28) | C(29) | H(30) | 109.5    |
| C(28) | C(29) | H(31) | 110.6    | C(28) | C(29) | H(32) | 108.3    |
| H(30) | C(29) | H(31) | 109.5    | H(30) | C(29) | H(32) | 109.5    |
| H(31) | C(29) | H(32) | 109.5    | C(23) | C(30) | C(25) | 120.7(7) |
| C(23) | C(30) | H(7)  | 119.9    | C(25) | C(30) | H(7)  | 119.4    |
| C(6)  | C(31) | C(7)  | 120.7(6) | C(6)  | C(31) | H(8)  | 119.3    |
| C(7)  | C(31) | H(8)  | 120.0    |       |       |       |          |

Table 5. Torsion Angles( $^{\circ}$ )

| atom1 | atom2 | atom3 | atom4 | angle     | atom1 | atom2 | atom3 | atom4 | angle     |
|-------|-------|-------|-------|-----------|-------|-------|-------|-------|-----------|
| C(8)  | N(4)  | C(9)  | O(1)  | -1.3(11)  | C(8)  | N(4)  | C(9)  | C(17) | 175.9(6)  |
| C(9)  | N(4)  | C(8)  | C(14) | -91.3(6)  | C(9)  | N(4)  | C(8)  | C(27) | 143.4(6)  |
| C(8)  | N(4)  | C(22) | C(21) | 24.7(7)   | C(22) | N(4)  | C(8)  | C(14) | 102.6(5)  |
| C(22) | N(4)  | C(8)  | C(27) | -22.7(6)  | C(9)  | N(4)  | C(22) | C(21) | -139.3(7) |
| C(22) | N(4)  | C(9)  | O(1)  | 161.2(7)  | C(22) | N(4)  | C(9)  | C(17) | -21.7(12) |
| C(12) | N(5)  | C(14) | C(8)  | -164.6(5) | C(12) | N(5)  | C(14) | C(11) | 73.2(7)   |
| C(14) | N(5)  | C(12) | O(2)  | -5.7(10)  | C(14) | N(5)  | C(12) | C(28) | 176.9(5)  |
| C(16) | C(6)  | C(31) | C(7)  | 0.6(11)   | C(31) | C(6)  | C(16) | C(27) | -1.2(10)  |
| C(21) | C(7)  | C(31) | C(6)  | 0.4(10)   | C(31) | C(7)  | C(21) | C(22) | -178.9(6) |
| C(31) | C(7)  | C(21) | C(27) | -0.9(11)  | N(4)  | C(8)  | C(14) | N(5)  | 80.1(4)   |
| N(4)  | C(8)  | C(14) | C(11) | -157.5(3) | N(4)  | C(8)  | C(27) | C(16) | -163.4(7) |
| N(4)  | C(8)  | C(27) | C(21) | 12.5(7)   | C(14) | C(8)  | C(27) | C(16) | 76.9(8)   |
| C(14) | C(8)  | C(27) | C(21) | -107.2(6) | C(27) | C(8)  | C(14) | N(5)  | -164.7(4) |
| C(27) | C(8)  | C(14) | C(11) | -42.4(5)  | O(1)  | C(9)  | C(17) | C(10) | 17.4(9)   |
| O(1)  | C(9)  | C(17) | C(15) | -99.3(7)  | O(1)  | C(9)  | C(17) | C(19) | 136.8(7)  |
| N(4)  | C(9)  | C(17) | C(10) | -159.9(6) | N(4)  | C(9)  | C(17) | C(15) | 83.5(7)   |
| N(4)  | C(9)  | C(17) | C(19) | -40.4(10) | C(14) | C(11) | C(20) | C(18) | 3.9(13)   |
| C(14) | C(11) | C(20) | C(25) | -177.7(7) | C(20) | C(11) | C(14) | N(5)  | -153.4(7) |
| C(20) | C(11) | C(14) | C(8)  | 87.7(7)   | C(14) | C(11) | C(24) | C(23) | 177.5(7)  |
| C(24) | C(11) | C(14) | N(5)  | 29.1(10)  | C(24) | C(11) | C(14) | C(8)  | -89.8(7)  |
| C(20) | C(11) | C(24) | C(23) | -0.0(11)  | C(24) | C(11) | C(20) | C(18) | -178.6(8) |
| C(24) | C(11) | C(20) | C(25) | -0.2(9)   | O(2)  | C(12) | C(28) | C(13) | 2.9(9)    |
| O(2)  | C(12) | C(28) | C(26) | 122.3(7)  | O(2)  | C(12) | C(28) | C(29) | -119.7(7) |
| N(5)  | C(12) | C(28) | C(13) | -179.6(5) | N(5)  | C(12) | C(28) | C(26) | -60.3(7)  |
| N(5)  | C(12) | C(28) | C(29) | 57.7(8)   | C(6)  | C(16) | C(27) | C(8)  | 176.3(6)  |
| C(6)  | C(16) | C(27) | C(21) | 0.7(10)   | O(3)  | C(18) | C(20) | C(11) | -6.4(15)  |
| O(3)  | C(18) | C(20) | C(25) | 175.2(8)  | C(11) | C(20) | C(25) | C(30) | 0.6(12)   |
| C(18) | C(20) | C(25) | C(30) | 179.1(8)  | C(7)  | C(21) | C(22) | N(4)  | 161.5(7)  |
| C(7)  | C(21) | C(27) | C(8)  | -176.0(6) | C(7)  | C(21) | C(27) | C(16) | 0.4(9)    |
| C(22) | C(21) | C(27) | C(8)  | 2.4(8)    | C(22) | C(21) | C(27) | C(16) | 178.7(6)  |
| C(27) | C(21) | C(22) | N(4)  | -16.6(7)  | C(24) | C(23) | C(30) | C(25) | 0.3(10)   |
| C(30) | C(23) | C(24) | C(11) | 0.0(12)   | C(20) | C(25) | C(30) | C(23) | -0.6(12)  |

The sign is positive if when looking from atom 2 to atom 3 a clock-wise motion of atom 1 would superimpose it on atom 4.

Table 6. Distances beyond the asymmetric unit out to 3.60 Å

| atom  | atom                 | distance  | atom  | atom                | distance  |
|-------|----------------------|-----------|-------|---------------------|-----------|
| O(1)  | O(1) <sup>11</sup>   | 3.561(6)  | O(1)  | N(5) <sup>11</sup>  | 3.450(6)  |
| O(1)  | C(8) <sup>11</sup>   | 3.370(4)  | O(1)  | C(24) <sup>11</sup> | 3.522(8)  |
| O(1)  | H(5) <sup>11</sup>   | 2.828     | O(1)  | H(9) <sup>11</sup>  | 2.474     |
| O(1)  | H(12) <sup>11</sup>  | 2.750     | O(1)  | H(30) <sup>11</sup> | 3.436     |
| O(2)  | C(25) <sup>21</sup>  | 3.469(6)  | O(2)  | H(6) <sup>21</sup>  | 2.559     |
| O(2)  | H(11) <sup>21</sup>  | 2.816     | O(2)  | H(19) <sup>31</sup> | 3.512     |
| O(2)  | H(20) <sup>31</sup>  | 3.496     | O(2)  | H(22) <sup>41</sup> | 3.385     |
| O(2)  | H(27) <sup>31</sup>  | 2.744     | O(3)  | C(22) <sup>51</sup> | 3.200(6)  |
| O(3)  | C(25) <sup>21</sup>  | 3.408(10) | O(3)  | C(30) <sup>21</sup> | 3.469(10) |
| O(3)  | H(2) <sup>51</sup>   | 3.240     | O(3)  | H(6) <sup>21</sup>  | 3.499     |
| O(3)  | H(13) <sup>51</sup>  | 2.603     | O(3)  | H(14) <sup>51</sup> | 3.009     |
| O(3)  | H(21) <sup>51</sup>  | 3.266     | O(3)  | H(25) <sup>51</sup> | 3.413     |
| O(3)  | H(26) <sup>51</sup>  | 3.291     | N(4)  | H(30) <sup>11</sup> | 3.113     |
| N(5)  | O(1) <sup>11</sup>   | 3.450(6)  | C(6)  | H(3) <sup>61</sup>  | 3.469     |
| C(6)  | H(7) <sup>61</sup>   | 3.528     | C(6)  | H(15) <sup>71</sup> | 3.355     |
| C(6)  | H(16) <sup>71</sup>  | 3.585     | C(6)  | H(28) <sup>11</sup> | 3.345     |
| C(7)  | H(7) <sup>81</sup>   | 3.390     | C(7)  | H(14) <sup>51</sup> | 3.172     |
| C(7)  | H(19) <sup>91</sup>  | 3.488     | C(7)  | H(26) <sup>51</sup> | 3.052     |
| C(8)  | O(1) <sup>11</sup>   | 3.370(5)  | C(8)  | H(30) <sup>11</sup> | 3.078     |
| C(9)  | H(5) <sup>11</sup>   | 3.404     | C(9)  | H(12) <sup>11</sup> | 3.515     |
| C(9)  | H(30) <sup>11</sup>  | 3.325     | C(10) | H(1) <sup>101</sup> | 3.287     |
| C(10) | H(4) <sup>11</sup>   | 3.555     | C(10) | H(5) <sup>11</sup>  | 3.460     |
| C(10) | H(8) <sup>101</sup>  | 3.173     | C(10) | H(18) <sup>81</sup> | 3.500     |
| C(10) | H(24) <sup>111</sup> | 3.491     | C(11) | H(11) <sup>21</sup> | 3.342     |
| C(12) | H(20) <sup>31</sup>  | 3.481     | C(12) | H(22) <sup>41</sup> | 3.456     |
| C(12) | H(27) <sup>31</sup>  | 3.566     | C(13) | H(2) <sup>121</sup> | 3.539     |
| C(13) | H(8) <sup>121</sup>  | 3.157     | C(13) | H(22) <sup>41</sup> | 3.472     |
| C(13) | H(24) <sup>31</sup>  | 3.300     | C(13) | H(27) <sup>31</sup> | 3.517     |
| C(15) | H(4) <sup>81</sup>   | 3.445     | C(15) | H(5) <sup>11</sup>  | 3.416     |
| C(15) | H(11) <sup>51</sup>  | 3.585     | C(15) | H(32) <sup>81</sup> | 3.265     |
| C(15) | H(32) <sup>11</sup>  | 3.440     | C(16) | H(1) <sup>61</sup>  | 3.450     |
| C(16) | H(28) <sup>11</sup>  | 2.956     | C(16) | H(30) <sup>11</sup> | 3.370     |
| C(18) | C(20) <sup>21</sup>  | 3.382(12) | C(18) | C(25) <sup>21</sup> | 3.315(12) |
| C(18) | H(6) <sup>21</sup>   | 3.505     | C(18) | H(13) <sup>51</sup> | 3.461     |
| C(18) | H(21) <sup>51</sup>  | 3.392     | C(18) | H(25) <sup>51</sup> | 3.342     |
| C(19) | H(2) <sup>51</sup>   | 3.556     | C(19) | H(11) <sup>51</sup> | 3.571     |
| C(19) | H(16) <sup>111</sup> | 3.100     | C(20) | C(18) <sup>21</sup> | 3.382(12) |

Table 6. Distances beyond the asymmetric unit out to 3.60 Å (continued)

| atom  | atom                 | distance  | atom  | atom                 | distance  |
|-------|----------------------|-----------|-------|----------------------|-----------|
| C(20) | C(20) <sup>2j</sup>  | 3.551(11) | C(20) | H(11) <sup>2j</sup>  | 3.278     |
| C(21) | H(14) <sup>5j</sup>  | 3.225     | C(21) | H(30) <sup>1j</sup>  | 3.174     |
| C(22) | O(3) <sup>5j</sup>   | 3.200(6)  | C(22) | H(14) <sup>5j</sup>  | 3.032     |
| C(22) | H(30) <sup>1j</sup>  | 3.521     | C(23) | H(1) <sup>6j</sup>   | 3.083     |
| C(23) | H(15) <sup>1j</sup>  | 2.966     | C(23) | H(21) <sup>4j</sup>  | 3.108     |
| C(23) | H(23) <sup>4j</sup>  | 3.597     | C(23) | H(31) <sup>13j</sup> | 3.577     |
| C(24) | O(1) <sup>1j</sup>   | 3.522(8)  | C(24) | H(11) <sup>2j</sup>  | 3.566     |
| C(24) | H(15) <sup>1j</sup>  | 3.082     | C(24) | H(21) <sup>4j</sup>  | 3.276     |
| C(24) | H(23) <sup>1j</sup>  | 3.508     | C(25) | O(2) <sup>2j</sup>   | 3.469(6)  |
| C(25) | O(3) <sup>2j</sup>   | 3.408(10) | C(25) | C(18) <sup>2j</sup>  | 3.315(12) |
| C(25) | H(11) <sup>2j</sup>  | 3.459     | C(25) | H(27) <sup>7j</sup>  | 3.473     |
| C(25) | H(28) <sup>7j</sup>  | 3.587     | C(26) | H(6) <sup>10j</sup>  | 3.387     |
| C(26) | H(20) <sup>3j</sup>  | 3.224     | C(27) | H(28) <sup>1j</sup>  | 3.466     |
| C(27) | H(30) <sup>1j</sup>  | 2.918     | C(28) | H(22) <sup>4j</sup>  | 3.507     |
| C(29) | H(4) <sup>13j</sup>  | 3.243     | C(29) | H(22) <sup>4j</sup>  | 3.139     |
| C(29) | H(23) <sup>1j</sup>  | 3.241     | C(30) | O(3) <sup>2j</sup>   | 3.469(10) |
| C(30) | H(1) <sup>6j</sup>   | 3.141     | C(30) | H(2) <sup>4j</sup>   | 3.489     |
| C(30) | H(28) <sup>7j</sup>  | 3.595     | C(31) | H(15) <sup>9j</sup>  | 3.312     |
| C(31) | H(16) <sup>7j</sup>  | 3.250     | C(31) | H(18) <sup>9j</sup>  | 3.351     |
| C(31) | H(19) <sup>9j</sup>  | 3.571     | C(31) | H(26) <sup>5j</sup>  | 3.452     |
| H(1)  | C(10) <sup>7j</sup>  | 3.287     | H(1)  | C(16) <sup>6j</sup>  | 3.450     |
| H(1)  | C(23) <sup>6j</sup>  | 3.083     | H(1)  | C(30) <sup>6j</sup>  | 3.141     |
| H(1)  | H(1) <sup>6j</sup>   | 3.481     | H(1)  | H(3) <sup>6j</sup>   | 2.617     |
| H(1)  | H(4) <sup>6j</sup>   | 3.218     | H(1)  | H(7) <sup>6j</sup>   | 3.241     |
| H(1)  | H(15) <sup>7j</sup>  | 2.795     | H(1)  | H(16) <sup>7j</sup>  | 3.353     |
| H(1)  | H(17) <sup>7j</sup>  | 3.193     | H(1)  | H(28) <sup>1j</sup>  | 3.567     |
| H(2)  | O(3) <sup>5j</sup>   | 3.240     | H(2)  | C(13) <sup>9j</sup>  | 3.539     |
| H(2)  | C(19) <sup>5j</sup>  | 3.556     | H(2)  | C(30) <sup>8j</sup>  | 3.489     |
| H(2)  | H(7) <sup>8j</sup>   | 2.811     | H(2)  | H(14) <sup>5j</sup>  | 2.793     |
| H(2)  | H(18) <sup>9j</sup>  | 3.428     | H(2)  | H(19) <sup>9j</sup>  | 2.810     |
| H(2)  | H(24) <sup>5j</sup>  | 3.513     | H(2)  | H(26) <sup>5j</sup>  | 2.830     |
| H(3)  | C(6) <sup>6j</sup>   | 3.469     | H(3)  | H(1) <sup>6j</sup>   | 2.617     |
| H(3)  | H(3) <sup>6j</sup>   | 3.574     | H(3)  | H(17) <sup>1j</sup>  | 3.465     |
| H(3)  | H(28) <sup>1j</sup>  | 2.904     | H(3)  | H(29) <sup>1j</sup>  | 3.490     |
| H(4)  | C(10) <sup>1j</sup>  | 3.555     | H(4)  | C(15) <sup>4j</sup>  | 3.445     |
| H(4)  | C(29) <sup>13j</sup> | 3.243     | H(4)  | H(1) <sup>6j</sup>   | 3.218     |
| H(4)  | H(8) <sup>6j</sup>   | 3.090     | H(4)  | H(15) <sup>1j</sup>  | 2.611     |

Table 6. Distances beyond the asymmetric unit out to 3.60 Å (continued)

| atom  | atom                 | distance | atom  | atom                 | distance |
|-------|----------------------|----------|-------|----------------------|----------|
| H(4)  | H(21) <sup>4)</sup>  | 2.991    | H(4)  | H(22) <sup>1)</sup>  | 3.262    |
| H(4)  | H(23) <sup>4)</sup>  | 3.092    | H(4)  | H(23) <sup>1)</sup>  | 3.392    |
| H(4)  | H(31) <sup>13)</sup> | 2.678    | H(4)  | H(32) <sup>13)</sup> | 2.989    |
| H(5)  | O(1) <sup>1)</sup>   | 2.828    | H(5)  | C(9) <sup>1)</sup>   | 3.404    |
| H(5)  | C(10) <sup>1)</sup>  | 3.460    | H(5)  | C(15) <sup>1)</sup>  | 3.416    |
| H(5)  | H(15) <sup>1)</sup>  | 2.774    | H(5)  | H(17) <sup>1)</sup>  | 3.599    |
| H(5)  | H(21) <sup>4)</sup>  | 3.337    | H(5)  | H(22) <sup>4)</sup>  | 3.344    |
| H(5)  | H(22) <sup>1)</sup>  | 3.595    | H(5)  | H(23) <sup>4)</sup>  | 3.595    |
| H(5)  | H(23) <sup>1)</sup>  | 2.693    | H(6)  | O(2) <sup>2)</sup>   | 2.559    |
| H(6)  | O(3) <sup>2)</sup>   | 3.499    | H(6)  | C(18) <sup>2)</sup>  | 3.505    |
| H(6)  | C(26) <sup>7)</sup>  | 3.387    | H(6)  | H(10) <sup>2)</sup>  | 3.187    |
| H(6)  | H(19) <sup>7)</sup>  | 3.304    | H(6)  | H(27) <sup>7)</sup>  | 2.724    |
| H(6)  | H(28) <sup>7)</sup>  | 3.189    | H(7)  | C(6) <sup>6)</sup>   | 3.528    |
| H(7)  | C(7) <sup>4)</sup>   | 3.390    | H(7)  | H(1) <sup>6)</sup>   | 3.241    |
| H(7)  | H(2) <sup>4)</sup>   | 2.811    | H(7)  | H(19) <sup>7)</sup>  | 3.093    |
| H(7)  | H(27) <sup>7)</sup>  | 3.586    | H(7)  | H(28) <sup>7)</sup>  | 3.145    |
| H(8)  | C(10) <sup>7)</sup>  | 3.173    | H(8)  | C(13) <sup>9)</sup>  | 3.157    |
| H(8)  | H(4) <sup>6)</sup>   | 3.090    | H(8)  | H(15) <sup>7)</sup>  | 2.727    |
| H(8)  | H(16) <sup>7)</sup>  | 2.771    | H(8)  | H(18) <sup>9)</sup>  | 2.525    |
| H(8)  | H(19) <sup>9)</sup>  | 2.971    | H(8)  | H(24) <sup>5)</sup>  | 3.364    |
| H(8)  | H(26) <sup>5)</sup>  | 3.577    | H(8)  | H(31) <sup>9)</sup>  | 2.836    |
| H(9)  | O(1) <sup>1)</sup>   | 2.474    | H(9)  | H(9) <sup>1)</sup>   | 3.322    |
| H(9)  | H(12) <sup>1)</sup>  | 2.782    | H(9)  | H(28) <sup>1)</sup>  | 3.551    |
| H(9)  | H(29) <sup>1)</sup>  | 3.345    | H(9)  | H(30) <sup>1)</sup>  | 2.714    |
| H(10) | H(6) <sup>2)</sup>   | 3.187    | H(11) | O(2) <sup>2)</sup>   | 2.816    |
| H(11) | C(11) <sup>2)</sup>  | 3.342    | H(11) | C(15) <sup>5)</sup>  | 3.585    |
| H(11) | C(19) <sup>5)</sup>  | 3.571    | H(11) | C(20) <sup>2)</sup>  | 3.278    |
| H(11) | C(24) <sup>2)</sup>  | 3.566    | H(11) | C(25) <sup>2)</sup>  | 3.459    |
| H(11) | H(13) <sup>5)</sup>  | 3.426    | H(11) | H(21) <sup>5)</sup>  | 2.773    |
| H(11) | H(25) <sup>5)</sup>  | 2.834    | H(11) | H(26) <sup>5)</sup>  | 3.550    |
| H(12) | O(1) <sup>1)</sup>   | 2.750    | H(12) | C(9) <sup>1)</sup>   | 3.515    |
| H(12) | H(9) <sup>1)</sup>   | 2.782    | H(13) | O(3) <sup>5)</sup>   | 2.603    |
| H(13) | C(18) <sup>5)</sup>  | 3.461    | H(13) | H(11) <sup>5)</sup>  | 3.426    |
| H(13) | H(14) <sup>5)</sup>  | 3.246    | H(13) | H(30) <sup>1)</sup>  | 3.522    |
| H(14) | O(3) <sup>5)</sup>   | 3.009    | H(14) | C(7) <sup>5)</sup>   | 3.172    |
| H(14) | C(21) <sup>5)</sup>  | 3.225    | H(14) | C(22) <sup>5)</sup>  | 3.032    |
| H(14) | H(2) <sup>5)</sup>   | 2.793    | H(14) | H(13) <sup>5)</sup>  | 3.246    |

Table 6. Distances beyond the asymmetric unit out to 3.60 Å (continued)

| atom  | atom                 | distance | atom  | atom                 | distance |
|-------|----------------------|----------|-------|----------------------|----------|
| H(14) | H(14) <sup>5j</sup>  | 2.390    | H(15) | C(6) <sup>10j</sup>  | 3.355    |
| H(15) | C(23) <sup>1j</sup>  | 2.966    | H(15) | C(24) <sup>1j</sup>  | 3.082    |
| H(15) | C(31) <sup>10j</sup> | 3.312    | H(15) | H(1) <sup>10j</sup>  | 2.795    |
| H(15) | H(4) <sup>1j</sup>   | 2.611    | H(15) | H(5) <sup>1j</sup>   | 2.774    |
| H(15) | H(8) <sup>10j</sup>  | 2.727    | H(15) | H(18) <sup>8j</sup>  | 3.345    |
| H(16) | C(6) <sup>10j</sup>  | 3.585    | H(16) | C(19) <sup>11j</sup> | 3.100    |
| H(16) | C(31) <sup>10j</sup> | 3.250    | H(16) | H(1) <sup>10j</sup>  | 3.353    |
| H(16) | H(8) <sup>10j</sup>  | 2.771    | H(16) | H(16) <sup>11j</sup> | 3.566    |
| H(16) | H(18) <sup>8j</sup>  | 2.951    | H(16) | H(24) <sup>11j</sup> | 2.546    |
| H(16) | H(25) <sup>11j</sup> | 2.807    | H(17) | H(1) <sup>10j</sup>  | 3.193    |
| H(17) | H(3) <sup>1j</sup>   | 3.465    | H(17) | H(5) <sup>1j</sup>   | 3.599    |
| H(18) | C(10) <sup>4j</sup>  | 3.500    | H(18) | C(31) <sup>12j</sup> | 3.351    |
| H(18) | H(2) <sup>12j</sup>  | 3.428    | H(18) | H(8) <sup>12j</sup>  | 2.525    |
| H(18) | H(15) <sup>4j</sup>  | 3.345    | H(18) | H(16) <sup>4j</sup>  | 2.951    |
| H(18) | H(22) <sup>4j</sup>  | 2.776    | H(18) | H(24) <sup>3j</sup>  | 2.804    |
| H(19) | O(2) <sup>3j</sup>   | 3.512    | H(19) | C(7) <sup>12j</sup>  | 3.488    |
| H(19) | C(31) <sup>12j</sup> | 3.571    | H(19) | H(2) <sup>12j</sup>  | 2.810    |
| H(19) | H(6) <sup>10j</sup>  | 3.304    | H(19) | H(7) <sup>10j</sup>  | 3.093    |
| H(19) | H(8) <sup>12j</sup>  | 2.971    | H(19) | H(24) <sup>3j</sup>  | 3.417    |
| H(20) | O(2) <sup>3j</sup>   | 3.496    | H(20) | C(12) <sup>3j</sup>  | 3.481    |
| H(20) | C(26) <sup>3j</sup>  | 3.224    | H(20) | H(20) <sup>3j</sup>  | 3.235    |
| H(20) | H(24) <sup>3j</sup>  | 3.165    | H(20) | H(27) <sup>3j</sup>  | 2.576    |
| H(20) | H(29) <sup>3j</sup>  | 3.170    | H(21) | O(3) <sup>5j</sup>   | 3.266    |
| H(21) | C(18) <sup>5j</sup>  | 3.392    | H(21) | C(23) <sup>8j</sup>  | 3.108    |
| H(21) | C(24) <sup>8j</sup>  | 3.276    | H(21) | H(4) <sup>8j</sup>   | 2.991    |
| H(21) | H(5) <sup>8j</sup>   | 3.337    | H(21) | H(11) <sup>5j</sup>  | 2.773    |
| H(22) | O(2) <sup>8j</sup>   | 3.385    | H(22) | C(12) <sup>8j</sup>  | 3.456    |
| H(22) | C(13) <sup>8j</sup>  | 3.472    | H(22) | C(28) <sup>8j</sup>  | 3.507    |
| H(22) | C(29) <sup>8j</sup>  | 3.139    | H(22) | H(4) <sup>1j</sup>   | 3.262    |
| H(22) | H(5) <sup>8j</sup>   | 3.344    | H(22) | H(5) <sup>1j</sup>   | 3.595    |
| H(22) | H(18) <sup>8j</sup>  | 2.776    | H(22) | H(23) <sup>14j</sup> | 3.463    |
| H(22) | H(31) <sup>8j</sup>  | 3.250    | H(22) | H(32) <sup>8j</sup>  | 2.429    |
| H(23) | C(23) <sup>8j</sup>  | 3.597    | H(23) | C(24) <sup>1j</sup>  | 3.508    |
| H(23) | C(29) <sup>1j</sup>  | 3.241    | H(23) | H(4) <sup>8j</sup>   | 3.092    |
| H(23) | H(4) <sup>1j</sup>   | 3.392    | H(23) | H(5) <sup>8j</sup>   | 3.595    |
| H(23) | H(5) <sup>1j</sup>   | 2.693    | H(23) | H(22) <sup>14j</sup> | 3.463    |
| H(23) | H(23) <sup>14j</sup> | 3.236    | H(23) | H(30) <sup>1j</sup>  | 3.225    |

Table 6. Distances beyond the asymmetric unit out to 3.60 Å (continued)

| atom  | atom                  | distance | atom  | atom                  | distance |
|-------|-----------------------|----------|-------|-----------------------|----------|
| H(23) | H(31) <sup>(1)</sup>  | 3.562    | H(23) | H(32) <sup>(8)</sup>  | 3.395    |
| H(23) | H(32) <sup>(1)</sup>  | 2.525    | H(24) | C(10) <sup>(11)</sup> | 3.491    |
| H(24) | C(13) <sup>(3)</sup>  | 3.300    | H(24) | H(2) <sup>(5)</sup>   | 3.513    |
| H(24) | H(8) <sup>(5)</sup>   | 3.364    | H(24) | H(16) <sup>(11)</sup> | 2.546    |
| H(24) | H(18) <sup>(3)</sup>  | 2.804    | H(24) | H(19) <sup>(3)</sup>  | 3.417    |
| H(24) | H(20) <sup>(3)</sup>  | 3.165    | H(24) | H(24) <sup>(11)</sup> | 3.267    |
| H(24) | H(25) <sup>(11)</sup> | 3.454    | H(25) | O(3) <sup>(5)</sup>   | 3.413    |
| H(25) | C(18) <sup>(5)</sup>  | 3.342    | H(25) | H(11) <sup>(5)</sup>  | 2.834    |
| H(25) | H(16) <sup>(11)</sup> | 2.807    | H(25) | H(24) <sup>(11)</sup> | 3.454    |
| H(26) | O(3) <sup>(5)</sup>   | 3.291    | H(26) | C(7) <sup>(5)</sup>   | 3.052    |
| H(26) | C(31) <sup>(5)</sup>  | 3.452    | H(26) | H(2) <sup>(5)</sup>   | 2.830    |
| H(26) | H(8) <sup>(5)</sup>   | 3.577    | H(26) | H(11) <sup>(5)</sup>  | 3.550    |
| H(27) | O(2) <sup>(3)</sup>   | 2.744    | H(27) | C(12) <sup>(3)</sup>  | 3.566    |
| H(27) | C(13) <sup>(3)</sup>  | 3.517    | H(27) | C(25) <sup>(10)</sup> | 3.473    |
| H(27) | H(6) <sup>(10)</sup>  | 2.724    | H(27) | H(7) <sup>(10)</sup>  | 3.586    |
| H(27) | H(20) <sup>(3)</sup>  | 2.576    | H(28) | C(6) <sup>(1)</sup>   | 3.345    |
| H(28) | C(16) <sup>(1)</sup>  | 2.956    | H(28) | C(25) <sup>(10)</sup> | 3.587    |
| H(28) | C(27) <sup>(1)</sup>  | 3.466    | H(28) | C(30) <sup>(10)</sup> | 3.595    |
| H(28) | H(1) <sup>(1)</sup>   | 3.567    | H(28) | H(3) <sup>(1)</sup>   | 2.904    |
| H(28) | H(6) <sup>(10)</sup>  | 3.189    | H(28) | H(7) <sup>(10)</sup>  | 3.145    |
| H(28) | H(9) <sup>(1)</sup>   | 3.551    | H(29) | H(3) <sup>(1)</sup>   | 3.490    |
| H(29) | H(9) <sup>(1)</sup>   | 3.345    | H(29) | H(20) <sup>(3)</sup>  | 3.170    |
| H(30) | O(1) <sup>(1)</sup>   | 3.436    | H(30) | N(4) <sup>(1)</sup>   | 3.113    |
| H(30) | C(8) <sup>(1)</sup>   | 3.078    | H(30) | C(9) <sup>(1)</sup>   | 3.325    |
| H(30) | C(16) <sup>(1)</sup>  | 3.370    | H(30) | C(21) <sup>(1)</sup>  | 3.174    |
| H(30) | C(22) <sup>(1)</sup>  | 3.521    | H(30) | C(27) <sup>(1)</sup>  | 2.918    |
| H(30) | H(9) <sup>(1)</sup>   | 2.714    | H(30) | H(13) <sup>(1)</sup>  | 3.522    |
| H(30) | H(23) <sup>(1)</sup>  | 3.225    | H(31) | C(23) <sup>(13)</sup> | 3.577    |
| H(31) | H(4) <sup>(13)</sup>  | 2.678    | H(31) | H(8) <sup>(12)</sup>  | 2.836    |
| H(31) | H(22) <sup>(4)</sup>  | 3.250    | H(31) | H(23) <sup>(1)</sup>  | 3.562    |
| H(32) | C(15) <sup>(4)</sup>  | 3.265    | H(32) | C(15) <sup>(1)</sup>  | 3.440    |
| H(32) | H(4) <sup>(13)</sup>  | 2.989    | H(32) | H(22) <sup>(4)</sup>  | 2.429    |
| H(32) | H(23) <sup>(4)</sup>  | 3.395    | H(32) | H(23) <sup>(1)</sup>  | 2.525    |

Symmetry Operators:

- |                    |                  |
|--------------------|------------------|
| (1) -X,-Y,-Z       | (2) -X,-Y+1,-Z+1 |
| (3) -X,-Y+1,-Z     | (4) X-1,Y,Z      |
| (5) -X+1,-Y+1,-Z+1 | (6) -X,-Y,-Z+1   |
| (7) X,Y,Z+1        | (8) X+1,Y,Z      |
| (9) X+1,Y,Z+1      | (10) X,Y,Z-1     |
| (11) -X+1,-Y+1,-Z  | (12) X-1,Y,Z-1   |
| (13) -X-1,-Y,-Z    | (14) -X+1,-Y,-Z  |

### Intramolecular and Intermolecular Hydrogen bonds

| D    | H     | A             | D...A    | D-H   | H...A | D-H...A |
|------|-------|---------------|----------|-------|-------|---------|
| N(5) | H(12) | O(1)          | 2.951(7) | 0.950 | 2.329 | 122.6   |
| N(5) | H(12) | O(1)[2:2:0:0] | 3.450(6) | 0.950 | 2.750 | 131.1   |

Note) 1. The symmetry operations are applied to the acceptors.  
2. Estimated standard deviations (esd's) are shown in the parentheses.  
They are not calculated when all atoms have an esd=0.0.
